# Supplementary material for: Interspecies systems biology links bacterial metabolic pathways to nematode gene expression, chemotaxis behavior, and survival
Source: HighWire-hosted journal article supplement (doi:10.1101/gr.280848.125), 2025-08-05
Supplement: Supplemental_Tables.xlsx [file Supplemental_Tables.xlsx]

## Sheet: Table S1 - Genome quality asses
Supplemental Table S1 – Genome quality assessment
The table shows a summary of assembly features for all sequenced bacterial genomes.
Strain	Genome size (Mb)	Number of proteins	Number of scaffolds	N50 (kb)	GC%	Genome completeness (BUSCO)	Gene annotation completeness (BUSCO)
LRB2	5.12	4674	87	672.89	59.58	96	96
LRB3	3.90	3552	88	752.23	42.78	100	100
LRB4	4.22	3856	94	457.68	37.87	100	100
LRB7	5.43	5014	45	607.25	55.05	100	100
LRB8	5.51	4906	54	496.14	64.57	100	100
LRB11	4.65	8398	74	418.6	35.77	98.4	98.4
LRB14	3.94	3661	103	945.09	38.67	99.2	99.2
LRB17	4.98	4638	231	226.27	48.56	99.2	99.2
LRB19	4.77	4319	42	2944.69	65.95	100	100
LRB20	4.17	3883	90	363.78	50.27	100	100
LRB21	3.92	3680	84	784.29	38.80	99.2	99.2
LRB26	6.20	5499	104	691.31	60.27	99.2	99.2
LRB28	5.64	5107	106	335.5	61.31	98.4	98.4
LRB29	4.07	3753	95	254.41	37.57	100	100
LRB31	4.73	4397	137	205.71	38.10	100	100
LRB32	4.73	4401	142	205.8	38	100	100
LRB33	3.85	3538	73	940.12	38.44	98.4	98.4
LRB34	4.87	4453	89	526.14	56.04	99.2	99.2
LRB40	5.24	4729	165	248.83	51.92	100	100
LRB41	3.12	3200	52	2119.9	46.28	100	100
LRB44	4.66	4255	230	377.52	40.51	99.2	99.2
LRB45	5.04	4472	175	223.22	36.19	99.2	99.2
LRB46	4.86	4429	163	327.94	57.21	96	96
LRB53	5.84	5215	178	473.05	62.34	100	100
LRB56	3.09	3064	76	995	36.11	99.2	99.2
LRB59	4.85	4568	116	351.04	37.98	100	100
LRB63	5.84	5215	162	320.82	62.34	100	100
LRB69	5.15	4742	60	525.25	55.06	100	100
LRB70	5.16	4746	72	2722.2	55.05	100	100
LRB72	5.12	4672	83	672.32	59.58	96	96
LRB73	6.15	5463	78	683.25	60.29	99.2	99.2
LRB74	4.67	4339	95	284.54	38.20	100	100
LRB80	4.17	3924	74	234.34	37.53	100	100
LRB81	4.09	3781	65	309.92	50.30	100	100
LRB83	6.16	5461	98	675.85	60.28	99.2	99.2
LRB88	6.84	6119	28	1146.16	63.44	100	100
LRB89	3.50	3259	48	404.49	31.42	98.4	98.4
LRB90	4.54	4188	128	222.37	38.17	100	100
LRB97b	3.83	3574	96	453.07	38.74	98.4	98.4
LRB98	4.96	4618	103	376.03	55.18	99.2	99.2
LRB103	5.64	5105	105	351.65	61.31	98.4	98.4
LRB104	3.75	3492	100	343.97	31.15	99.2	99.2
LRB108	3.50	3258	50	364.12	31.42	98.4	98.4
LRB109	4.23	3932	219	422	37.72	100	100
LRB111	4.23	3862	95	302	37.93	100	100
LRB112	4.23	7722	92	333.4	37.93	100	100
LRB113	3.06	2846	189	89.50	43.17	99.2	99.2
LRB119	5.27	4926	84	490.26	55.02	100	100
LRB120	5.3	4756	182	278.45	37.18	99.2	99.2
L2	5.44	4525	114	421.38	39.31	97.6	96.8
L23	6.31	5725	239	112.4	64.78	96.8	96.8
L27	5.66	5255	148	263.3	59.89	98.4	98.4
L28	5.12	4556	65	429.27	65.61	97.6	96.8
L29	5.65	5252	92	263.28	59.89	98.4	98.4
L31	3.93	3381	26	1192.52	67.01	100	100
L35	6.32	5722	240	112.4	64.78	96.8	96.8
L54	5.65	5256	92	263.3	59.89	98.4	98.4
L55A	6.32	5728	241	116.27	64.78	96.8	96.8
L74	5.88	5262	66	501.56	62.62	100	100
L91	6.32	5726	259	112.64	64.78	96.8	96.8
L93	6.32	5725	234	116.27	64.78	96.8	96.8
L100	6.9	5938	29	1718.23	64.55	96.8	96.8
V6	5.71	5388	434	56.02	58.60	95.2	95.2
V8	4.55	4210	138	97.84	53.84	96.8	96.8
V14	5.97	5849	957	24.17	53.40	100	100
V15	5.16	4845	245	70.29	59.47	96	96
V20	4.39	4173	244	95.33	53.83	97.6	97.6
V39	5.1	4898	1007	26.58	55.96	98.4	98.4
V46	5.75	5442	803	27.50	53.65	100	100
V48	4.69	4440	1254	21.51	56.56	97.6	97.6
V52	4.59	4300	186	105.92	53.66	96.8	96.8
V61	4.57	4264	171	108.51	53.79	96.8	96.8
V64	5.16	4844	248	65.53	59.47	96	96
V69	5.39	5148	876	22.79	54.00	100	100
V71	4.9	4474	682	32.54	54.89	100	100
V72	4.61	4324	179	94.37	53.76	96.8	96.8
V74	5.96	5843	956	24.73	53.40	100	100
V88	4.61	4321	176	94.37	53.75	96.8	96.8
V91	5.37	5024	567	33.7	53.23	99.2	99.2
V94	4.60	4391	415	55.18	55.25	99.2	99.2
V97	5.96	5856	932	24.08	54.39	100	100
NA6	4.98	4539	195	326.57	56.48	99.2	99.2
SFM3	4.53	4269	671	40.11	55.16	99.2	99.2
TSA3A	3.8	3604	77	234.19	42.31	98.4	98.4

## Sheet: Table S2 - Bacterial nomenclatu
Supplemental Table S2 – Bacterial nomenclature
The table shows the species assignment based on the best hits of the DIAMOND search of all annotated proteins against the NCBI nr database.
Strain	Assignment_DIAMOND	Median percent identity
LRB2	Serratia marcescens	100
LRB3	Acinetobacter courvalinii	100
LRB4	Proteus terrae	100
LRB7	Serratia quinivorans	100
LRB8	Pseudomonas putida	100
LRB11	Chryseobacterium sp. G0186	96.5
LRB14	Acinetobacter calcoaceticus	99.3
LRB17	Hafnia alvei	99.9
LRB19	Stenotrophomonas lactitubi	100
LRB20	Morganella morganii	100
LRB21	Acinetobacter pittii	99.7
LRB26	Pseudomonas fluorescens	100
LRB28	Comamonas thiooxydans	100
LRB29	Acinetobacter gerneri	99.6
LRB31	Acinetobacter guillouiae	99.8
LRB32	Acinetobacter guillouiae	99.8
LRB33	Acinetobacter seifertii	99.9
LRB34	Enterobacter asburiae	100
LRB40	Serratia fonticola	98.6
LRB41	Exiguobacterium sp. RIT341	99.7
LRB44	Providencia rettgeri	100
LRB45	Chryseobacterium sp. MEBOG06	97.9
LRB46	Cronobacter dublinensis	100
LRB53	Pseudomonas putida	100
LRB56	Kurthia gibsonii	98.3
LRB59	Acinetobacter sp. I-MWF	99.7
LRB63	Pseudomonas putida	100
LRB69	Serratia quinivorans	99.8
LRB70	Serratia quinivorans	99.8
LRB72	Serratia marcescens	100
LRB73	Pseudomonas fluorescens	100
LRB74	Acinetobacter guillouiae	99.7
LRB80	Acinetobacter gerneri	99.6
LRB81	Morganella morganii	100
LRB83	Pseudomonas fluorescens	100
LRB88	Pseudomonas protegens	100
LRB89	Empedobacter falsenii	99.2
LRB90	Acinetobacter sp. I-MWF	99.8
LRB98	Enterobacter asburiae	99.4
LRB103	Comamonas thiooxydans	100
LRB104	Empedobacter falsenii	99.5
LRB108	Empedobacter falsenii	99.1
LRB109	Acinetobacter gerneri	99.6
LRB111	Proteus terrae	100
LRB112	Proteus terrae	100
LRB113	Acinetobacter lwoffii	100
LRB119	Serratia quinivorans	100
LRB120	Chryseobacterium lactis	97.8
LRB97b	Acinetobacter calcoaceticus	98.4
L2	Sphingobacterium composti	75.6
L23	Achromobacter pestifer	96.4
L27	Agrobacterium tumefaciens	99.6
L28	Comamonas sp. BIGb0124	99.7
L29	Agrobacterium tumefaciens	99.6
L31	Stenotrophomonas rhizophila	94.3
L35	Achromobacter pestifer	96.4
L54	Agrobacterium tumefaciens	99.6
L55A	Achromobacter pestifer	96.4
L74	Pseudomonas sp. PDM14	82.5
L91	Achromobacter pestifer	96.4
L93	Achromobacter pestifer	96.4
L100	Achromobacter kerstersii	94
V6	Serratia marcescens	100
V8	Citrobacter koseri	100
V14	Klebsiella spallanzanii	99.6
V15	Serratia marcescens	100
V20	Citrobacter koseri	99.8
V39	Klebsiella michiganensis	99.6
V46	Klebsiella spallanzanii	99.9
V48	Raoultella sp. 10-1	99.4
V52	Citrobacter koseri	100
V61	Citrobacter koseri	100
V64	Serratia marcescens	100
V69	Escherichia coli	96
V71	Erwinia toletana	88.4
V72	Citrobacter koseri	100
V74	Klebsiella spallanzanii	99.6
V88	Citrobacter koseri	100
V91	Escherichia coli	90.8
V94	Enterobacter mori	99.6
V97	Klebsiella spallanzanii	99.6
NA6	Erwinia aphidicola	100
SFM3	Enterobacter mori	99.6
TSA3A	Enterococcus casseliflavus	100

## Sheet: Table S3 - Metabolic pathway gr
Supplemental Table S3 – Metabolic pathway groups
The table shows all the metacyc pathways together with the predicted absence/presence patterns across our bacterial collection.
Pathways	MPG Alias	LRB103	LRB104	LRB108	LRB109	LRB11	LRB111	LRB112	LRB113	LRB119	LRB120	LRB14	LRB17	LRB19	LRB2	LRB20	LRB21	LRB26	LRB28	LRB29	LRB3	LRB31	LRB32	LRB33	LRB34	LRB4	LRB40	LRB41	LRB44	LRB45	LRB46	LRB53	LRB56	LRB59	LRB63	LRB69	LRB7	LRB70	LRB72	LRB73	LRB74	LRB8	LRB80	LRB81	LRB83	LRB88	LRB89	LRB90	LRB97b
C4 photosynthetic carbon assimilation cycle, PEPCK type		0	0	0	0	0	0	0	0	1	0	0	0	0	1	0	0	1	0	0	0	0	0	0	0	0	0	0	0	0	0	1	0	0	1	1	1	1	1	1	0	1	0	0	1	1	0	0	0
L-alanine degradation II (to D-lactate)		0	1	1	0	0	1	0	0	1	0	0	1	1	1	1	0	1	0	0	0	0	0	0	1	1	1	0	1	0	0	1	0	0	1	1	1	1	1	1	0	1	0	1	1	1	1	0	0
resorcinol degradation		0	0	0	1	0	0	0	0	0	0	0	0	0	0	0	0	0	0	1	0	0	0	0	0	0	0	0	0	0	0	0	0	0	0	0	0	0	0	0	0	0	1	0	0	0	0	0	0
D-erythronate degradation II		0	0	0	0	0	0	0	0	0	0	0	0	0	0	0	0	0	0	0	0	0	0	0	0	0	1	0	1	0	0	0	0	0	0	1	0	1	0	0	0	0	0	0	0	1	0	0	0
sulfoacetate degradation		0	0	0	0	0	1	0	0	1	0	0	0	0	1	0	0	0	0	0	0	0	0	0	0	1	0	1	1	0	0	0	0	0	0	1	1	1	1	0	0	0	0	0	0	0	0	0	0
phenyl adenosylcobamide biosynthesis from adenosylcobinamide-GDP		0	0	0	0	0	0	0	0	0	0	0	0	0	0	0	0	0	0	0	0	0	0	0	0	0	0	0	0	0	0	0	0	0	0	0	0	0	0	0	0	0	0	0	0	0	0	0	0
4-methylphenyl adenosylcobamide biosynthesis from adenosylcobinamide-GDP		0	0	0	0	0	0	0	0	0	0	0	0	0	0	0	0	0	0	0	0	0	0	0	0	0	0	0	0	0	0	0	0	0	0	0	0	0	0	0	0	0	0	0	0	0	0	0	0
L-arginine degradation XIII (reductive Stickland reaction)		0	0	0	0	0	0	0	0	0	0	0	0	0	0	0	0	1	0	0	0	0	0	0	1	0	1	0	0	0	1	1	0	0	1	0	0	0	0	1	0	1	0	0	1	1	0	0	0
galactitol degradation		0	0	0	0	0	0	0	0	1	0	0	0	0	0	0	0	0	0	0	0	0	0	0	0	0	1	0	0	0	0	0	0	0	0	0	0	0	0	0	0	0	0	0	0	0	0	0	0
betaxanthin biosynthesis (via dopamine)		0	1	0	1	1	1	1	1	1	1	1	0	0	1	0	1	0	0	1	1	1	1	1	1	1	1	0	1	1	0	1	0	1	1	1	1	1	1	0	1	1	1	0	0	0	0	1	1
flavin biosynthesis III (fungi)		0	0	0	0	0	1	0	0	1	0	1	1	0	1	1	1	0	0	0	0	0	0	1	1	1	1	0	1	0	1	0	0	0	0	1	1	1	1	0	0	0	0	1	0	0	0	0	1
hydrogen oxidation II (aerobic, NAD)		0	0	0	0	0	0	0	0	0	0	0	0	0	0	0	0	0	0	0	0	0	0	0	0	0	0	0	0	0	0	0	0	0	0	0	0	0	0	0	0	0	0	0	0	0	0	0	0
hydrogen production II		0	0	0	0	0	0	0	0	0	0	0	0	0	0	0	0	0	0	0	0	0	0	0	0	0	0	0	0	0	0	0	0	0	0	0	0	0	0	0	0	0	0	0	0	0	0	0	0
dTDP-3-acetamido-&alpha;-D-fucose biosynthesis		0	0	0	0	0	0	0	0	0	0	0	0	0	0	0	0	0	0	0	0	0	0	0	0	0	0	0	0	0	0	0	0	0	0	0	0	0	0	0	0	0	0	0	0	0	0	0	0
uracil degradation III		0	0	0	0	0	0	0	0	1	0	0	0	0	0	0	0	0	0	0	0	0	0	1	1	0	0	0	0	0	1	0	0	0	0	1	1	1	0	0	0	0	0	0	0	0	0	0	0
pentaketide chromone biosynthesis		0	0	0	0	0	0	0	0	1	0	0	1	0	1	0	0	0	0	0	0	0	0	0	0	0	0	0	1	0	0	0	0	0	0	1	1	1	1	0	0	0	0	0	0	0	0	0	0
hydroxymethylpyrimidine salvage		0	0	0	0	0	1	0	0	1	0	0	1	0	1	1	0	0	0	0	0	0	0	0	1	1	1	1	1	0	1	0	1	0	0	1	1	1	1	0	0	0	0	1	0	0	0	0	0
L-glutamate degradation V (via hydroxyglutarate)		1	0	0	1	0	0	1	1	0	0	1	0	1	0	0	1	1	1	1	1	1	1	1	0	0	0	0	1	0	0	1	1	1	1	0	0	0	0	1	1	1	1	0	1	1	0	1	1
L-glutamate degradation XI (reductive Stickland reaction)		1	0	0	1	0	0	1	1	0	0	1	0	1	0	0	1	1	1	1	1	1	1	1	0	0	0	0	1	0	0	1	1	1	1	0	0	0	0	1	1	1	1	0	1	1	0	1	1
incomplete reductive TCA cycle	Group 14	0	0	0	0	0	0	0	0	0	0	0	0	0	0	0	0	0	0	0	0	0	0	0	0	0	0	1	0	0	0	0	0	0	0	0	0	0	0	0	0	0	0	0	0	0	0	0	0
formaldehyde assimilation II (assimilatory RuMP Cycle)	Group 14	0	0	0	0	0	0	0	0	0	0	0	0	0	0	0	0	0	0	0	0	0	0	0	0	0	0	1	0	0	0	0	0	0	0	0	0	0	0	0	0	0	0	0	0	0	0	0	0
petrobactin biosynthesis	Group 14	0	0	0	0	0	0	0	0	0	0	0	0	0	0	0	0	0	0	0	0	0	0	0	0	0	0	1	0	0	0	0	0	0	0	0	0	0	0	0	0	0	0	0	0	0	0	0	0
TCA cycle V (2-oxoglutarate synthase)	Group 14	0	0	0	0	0	0	0	0	0	0	0	0	0	0	0	0	0	0	0	0	0	0	0	0	0	0	1	0	0	0	0	0	0	0	0	0	0	0	0	0	0	0	0	0	0	0	0	0
thiamine phosphate formation from pyrithiamine and oxythiamine (yeast)	Group 14	0	0	0	0	0	0	0	0	0	0	0	0	0	0	0	0	0	0	0	0	0	0	0	0	0	0	1	0	0	0	0	0	0	0	0	0	0	0	0	0	0	0	0	0	0	0	0	0
pentose phosphate pathway (oxidative branch) II	Group 14	0	0	0	0	0	0	0	0	0	0	0	0	0	0	0	0	0	0	0	0	0	0	0	0	0	0	1	0	0	0	0	0	0	0	0	0	0	0	0	0	0	0	0	0	0	0	0	0
formaldehyde oxidation I	Group 14	0	0	0	0	0	0	0	0	0	0	0	0	0	0	0	0	0	0	0	0	0	0	0	0	0	0	1	0	0	0	0	0	0	0	0	0	0	0	0	0	0	0	0	0	0	0	0	0
L-ascorbate degradation I (bacterial, anaerobic)		0	0	0	0	0	0	0	0	0	0	0	1	0	1	0	0	0	0	0	0	0	0	0	1	0	1	0	1	0	0	0	0	0	0	0	0	0	1	0	0	0	0	0	0	0	0	0	0
D-apionate degradation I (xylose isomerase family decarboxylase)		0	0	0	0	0	0	0	0	0	0	0	0	0	0	0	0	0	0	0	0	0	0	0	0	0	0	0	0	0	0	0	0	0	0	0	0	0	0	0	0	0	0	0	0	0	0	0	0
glutathione biosynthesis		1	0	0	1	0	1	1	1	1	0	1	1	0	1	1	1	1	1	1	1	1	1	1	1	1	1	0	1	0	1	1	0	1	1	1	1	1	1	1	1	1	1	1	1	1	0	1	1
adenosylcobalamin biosynthesis from adenosylcobinamide-GDP I		0	0	0	1	0	0	0	0	0	0	1	1	0	0	0	1	1	0	1	1	1	1	1	0	0	1	0	0	0	0	1	0	1	1	0	0	0	0	1	1	1	1	0	1	1	0	1	1
L-threonine degradation II		0	0	0	0	0	1	0	0	1	0	0	1	1	1	0	0	1	0	0	0	0	0	0	1	1	1	1	1	0	1	1	0	0	1	1	1	1	1	1	0	1	0	0	1	1	0	0	0
glycolysis II (from fructose 6-phosphate)		1	1	1	0	1	1	0	0	1	1	0	1	1	1	1	0	1	1	0	0	0	0	0	1	1	1	1	1	1	1	1	1	0	1	1	1	1	1	1	0	1	0	1	1	1	1	0	0
4-hydroxymandelate degradation		1	0	0	1	0	0	0	0	0	0	1	0	0	1	1	1	0	1	1	1	1	1	1	0	0	0	0	0	0	0	0	0	1	0	0	0	0	1	0	1	1	1	1	0	1	0	1	1
methylglyoxal degradation III		0	0	0	0	0	1	0	0	1	0	0	1	0	1	1	0	0	0	0	0	0	0	0	1	1	1	1	0	0	1	0	0	0	0	1	1	1	1	0	0	0	0	1	0	0	0	0	0
4-hydroxyphenylacetate degradation		0	0	0	1	0	0	0	0	1	0	0	1	0	1	0	0	0	0	1	0	0	0	0	1	0	1	0	1	0	0	0	0	0	0	1	1	1	1	0	0	1	1	0	0	1	0	0	0
phosphatidylserine and phosphatidylethanolamine biosynthesis I		0	0	0	0	0	1	0	0	1	0	0	1	0	1	1	0	1	0	0	0	0	0	0	1	1	1	0	1	0	1	1	0	0	1	1	1	1	1	1	0	0	0	1	1	1	0	0	0
acetoacetate degradation (to acetyl CoA)		0	0	0	0	0	0	0	0	0	0	0	0	0	0	0	0	0	0	0	0	0	0	0	0	0	0	0	0	0	0	0	0	0	0	0	0	0	0	0	0	0	0	0	0	0	0	0	0
glycogen biosynthesis I (from ADP-D-Glucose)		0	0	0	0	1	1	0	0	1	1	0	1	0	1	0	0	1	0	0	0	0	0	0	1	1	1	1	0	1	1	1	0	0	1	1	1	1	1	1	0	1	0	0	1	1	0	0	0
dTDP-4-O-demethyl-beta-L-noviose biosynthesis		0	0	0	0	0	0	0	0	0	0	0	0	0	0	0	0	1	0	0	0	0	0	0	0	0	0	0	0	0	0	0	0	0	0	0	0	0	0	1	0	0	0	0	1	0	0	0	0
glycerol degradation II		0	0	0	0	0	1	1	1	0	0	0	0	0	0	0	0	0	0	0	0	0	0	0	1	1	0	1	0	0	1	0	0	0	0	0	0	0	0	0	0	0	0	0	0	0	0	0	0
fluoroacetate degradation		0	0	0	0	0	0	0	0	0	0	0	0	0	0	0	0	1	0	0	0	0	0	0	0	0	0	1	0	0	0	0	0	0	0	0	0	0	0	1	0	0	0	0	1	0	0	0	0
maltose degradation		0	0	0	0	0	0	0	0	0	0	0	0	0	0	0	0	0	0	0	0	0	0	0	0	0	0	1	0	0	0	0	0	0	0	0	0	0	0	0	0	0	0	0	0	0	0	0	0
methylamine degradation II		0	0	0	0	0	0	0	0	0	0	0	0	0	0	0	0	0	0	0	0	0	0	0	0	0	0	0	0	0	0	1	0	0	1	0	0	0	0	0	0	0	0	0	0	0	0	0	0
L-serine degradation		1	1	1	0	1	1	0	0	1	1	1	1	1	1	1	1	1	1	0	0	0	0	1	1	1	1	1	1	1	1	1	1	0	1	1	1	1	1	1	0	1	0	1	1	1	1	0	1
oleate biosynthesis IV (anaerobic)		1	0	0	0	0	1	0	0	1	0	0	1	1	1	1	0	1	1	0	0	0	0	0	1	1	1	0	1	0	1	1	0	0	1	1	1	1	1	1	0	1	0	1	1	1	0	0	0
two-component alkanesulfonate monooxygenase		0	0	0	0	0	0	0	0	1	0	0	1	0	1	0	0	1	0	0	0	0	0	0	1	0	1	0	0	0	1	1	0	0	1	1	1	1	1	1	0	1	0	0	1	1	0	0	0
heme a biosynthesis		0	0	0	0	0	0	0	0	0	0	0	0	0	0	0	0	0	0	0	0	0	0	0	0	0	0	1	0	0	0	0	0	0	0	0	0	0	0	0	0	0	0	0	0	0	0	0	0
histamine degradation		0	0	0	0	0	0	1	1	0	1	0	0	1	0	0	0	1	0	0	0	0	0	0	0	0	0	0	0	1	0	1	1	0	1	0	0	0	0	1	0	1	0	0	1	1	0	0	0
glycolate and glyoxylate degradation II		0	0	0	0	0	0	0	0	0	0	0	0	0	0	0	0	0	0	0	0	0	0	0	0	0	0	0	0	0	0	1	0	0	1	0	0	0	0	0	0	1	0	0	0	0	0	0	0
arsenate reduction (respiratory)		0	0	0	0	0	0	0	0	0	0	0	0	0	0	0	0	0	0	0	0	0	0	0	0	0	0	0	0	0	0	1	0	0	1	0	0	0	0	0	0	1	0	0	0	0	0	0	0
sulfate reduction I (assimilatory)		0	0	0	0	0	1	0	0	1	0	0	1	0	1	0	0	0	0	0	0	0	0	0	1	1	1	0	1	0	1	0	1	0	0	1	1	1	1	0	0	0	0	0	0	0	0	0	0
chitin degradation II (Vibrio)		0	0	0	0	0	0	0	0	1	0	0	0	1	1	0	0	1	0	0	1	0	0	0	1	0	1	0	0	0	1	0	0	0	0	1	1	1	1	1	0	0	0	0	1	1	0	0	0
sulfoacetaldehyde degradation I		1	1	1	1	0	1	1	1	1	0	1	1	0	1	1	1	1	1	1	1	1	1	1	1	1	1	0	1	0	1	1	0	1	1	1	1	1	1	1	1	1	1	1	1	1	1	1	1
ketogenesis		0	0	0	0	0	0	0	0	0	0	0	0	0	0	0	0	0	0	0	0	0	0	0	0	0	0	0	0	0	0	0	0	0	0	0	0	0	0	0	0	0	0	0	0	0	0	0	0
sulfoacetaldehyde degradation IV		0	0	0	0	0	1	0	0	1	0	0	1	0	1	0	0	0	0	0	0	0	0	0	1	1	1	0	0	0	1	0	0	0	0	1	1	1	1	0	0	0	0	0	0	0	0	0	0
taurine degradation II		1	0	0	0	0	0	0	0	0	0	0	0	0	0	0	0	0	1	0	0	0	0	0	0	0	0	0	0	0	0	0	0	0	0	0	0	0	0	0	0	0	0	0	0	0	0	0	0
benzoyl-CoA degradation I (aerobic)		1	0	0	0	0	0	0	0	0	0	0	0	0	0	0	0	0	1	0	0	0	0	0	0	0	0	0	0	0	0	0	0	0	0	0	0	0	0	0	0	0	0	0	0	0	0	0	0
L-rhamnose degradation III		1	0	0	0	0	0	0	0	0	0	0	0	0	0	0	0	0	1	0	0	0	0	0	0	0	0	0	0	0	0	0	0	0	0	0	0	0	0	0	0	0	0	0	0	0	0	0	0
gluconeogenesis I	Group 3	1	1	1	1	1	1	1	1	1	1	1	1	1	1	1	1	1	1	1	1	1	1	1	1	1	1	1	1	1	1	1	1	1	1	1	1	1	1	1	1	1	1	1	1	1	1	1	1
L-glutamate degradation II	Group 3	1	1	1	1	1	1	1	1	1	1	1	1	1	1	1	1	1	1	1	1	1	1	1	1	1	1	1	1	1	1	1	1	1	1	1	1	1	1	1	1	1	1	1	1	1	1	1	1
ppGpp metabolism	Group 3	1	1	1	1	1	1	1	1	1	1	1	1	1	1	1	1	1	1	1	1	1	1	1	1	1	1	1	1	1	1	1	1	1	1	1	1	1	1	1	1	1	1	1	1	1	1	1	1
acetate conversion to acetyl-CoA	Group 3	1	1	1	1	1	1	1	1	1	1	1	1	1	1	1	1	1	1	1	1	1	1	1	1	1	1	1	1	1	1	1	1	1	1	1	1	1	1	1	1	1	1	1	1	1	1	1	1
succinate to cytochrome bo oxidase electron transfer	Group 3	1	1	1	1	1	1	1	1	1	1	1	1	1	1	1	1	1	1	1	1	1	1	1	1	1	1	1	1	1	1	1	1	1	1	1	1	1	1	1	1	1	1	1	1	1	1	1	1
lipoate biosynthesis and incorporation I	Group 3	1	1	1	1	1	1	1	1	1	1	1	1	1	1	1	1	1	1	1	1	1	1	1	1	1	1	1	1	1	1	1	1	1	1	1	1	1	1	1	1	1	1	1	1	1	1	1	1
2-oxoglutarate decarboxylation to succinyl-CoA	Group 3	1	1	1	1	1	1	1	1	1	1	1	1	1	1	1	1	1	1	1	1	1	1	1	1	1	1	1	1	1	1	1	1	1	1	1	1	1	1	1	1	1	1	1	1	1	1	1	1
fatty acid beta-oxidation III (unsaturated, odd number)	Group 3	1	1	1	1	1	1	1	1	1	1	1	1	1	1	1	1	1	1	1	1	1	1	1	1	1	1	1	1	1	1	1	1	1	1	1	1	1	1	1	1	1	1	1	1	1	1	1	1
long-chain fatty acid activation	Group 3	1	1	1	1	1	1	1	1	1	1	1	1	1	1	1	1	1	1	1	1	1	1	1	1	1	1	1	1	1	1	1	1	1	1	1	1	1	1	1	1	1	1	1	1	1	1	1	1
TCA cycle III (animals)	Group 3	1	1	1	1	1	1	1	1	1	1	1	1	1	1	1	1	1	1	1	1	1	1	1	1	1	1	1	1	1	1	1	1	1	1	1	1	1	1	1	1	1	1	1	1	1	1	1	1
ethene biosynthesis III (microbes)	Group 3	1	1	1	1	1	1	1	1	1	1	1	1	1	1	1	1	1	1	1	1	1	1	1	1	1	1	1	1	1	1	1	1	1	1	1	1	1	1	1	1	1	1	1	1	1	1	1	1
UTP and CTP de novo biosynthesis	Group 3	1	1	1	1	1	1	1	1	1	1	1	1	1	1	1	1	1	1	1	1	1	1	1	1	1	1	1	1	1	1	1	1	1	1	1	1	1	1	1	1	1	1	1	1	1	1	1	1
TCA cycle I (prokaryotic)	Group 3	1	1	1	1	1	1	1	1	1	1	1	1	1	1	1	1	1	1	1	1	1	1	1	1	1	1	1	1	1	1	1	1	1	1	1	1	1	1	1	1	1	1	1	1	1	1	1	1
L-threonine degradation I		0	0	0	0	0	1	0	0	1	0	0	1	0	1	1	0	0	0	0	0	0	0	0	1	1	1	0	1	0	1	0	0	0	0	1	1	1	1	0	0	0	0	1	0	0	0	0	0
pyruvate fermentation to ethanol I		0	0	0	0	0	1	0	0	1	0	0	1	0	1	1	0	0	0	0	0	0	0	0	1	1	1	0	1	0	1	0	0	0	0	1	1	1	1	0	0	0	0	1	0	0	0	0	0
8-amino-7-oxononanoate biosynthesis III		0	0	0	1	0	0	0	0	0	0	0	0	0	0	0	0	0	0	1	0	0	0	0	0	0	0	0	0	0	0	0	1	0	0	0	0	0	0	0	0	0	0	0	0	1	0	0	0
L-methionine salvage from L-homocysteine		0	0	0	0	0	0	0	0	1	0	0	0	0	1	0	0	0	0	0	0	0	0	0	1	0	1	0	0	0	1	0	1	0	0	1	1	1	1	0	0	0	0	0	0	0	0	0	0
itaconate degradation		0	0	0	0	0	0	0	0	0	0	0	0	0	0	0	0	0	0	0	0	0	0	0	0	0	0	0	0	0	0	0	0	0	0	0	0	0	0	0	0	0	0	0	0	1	0	0	0
trans-caffeate degradation (aerobic)		0	0	0	1	0	0	0	0	0	0	0	0	0	0	0	0	0	0	1	0	0	0	0	0	0	0	0	0	0	0	0	0	0	0	0	0	0	0	0	0	0	0	0	0	0	0	0	0
S-methyl-5-thio-&alpha;-D-ribose 1-phosphate degradation III		0	0	0	0	0	0	0	0	0	0	0	0	0	0	1	0	0	0	0	0	0	0	0	0	0	0	0	0	0	0	0	0	0	0	0	0	0	0	0	0	0	0	1	0	0	0	0	0
L-arginine degradation X (arginine monooxygenase pathway)		0	0	0	0	0	0	0	0	0	0	0	0	0	0	0	0	1	0	0	0	0	0	0	0	0	0	1	0	0	0	1	1	0	1	0	0	0	0	1	0	1	0	0	1	1	0	0	0
L-phenylalanine biosynthesis III (cytosolic, plants)		1	0	0	1	0	1	0	0	1	0	1	1	1	1	1	1	1	1	1	1	1	1	1	1	1	1	0	1	0	1	1	1	1	1	1	1	1	1	1	1	1	1	1	1	1	0	1	1
UDP-N-acetylmuramoyl-pentapeptide biosynthesis I (meso-diaminopimelate containing)		1	1	1	1	1	1	1	1	1	1	1	1	1	1	1	1	1	1	1	1	1	1	1	1	1	1	1	1	1	1	1	1	1	1	1	1	1	1	1	1	1	1	1	1	1	1	1	1
peptidoglycan biosynthesis I (meso-diaminopimelate containing)		1	1	1	1	1	1	1	1	1	1	1	1	1	1	1	1	1	1	1	1	1	1	1	1	1	1	1	1	1	1	1	1	1	1	1	1	1	1	1	1	1	1	1	1	1	1	1	1
N-methylpyrrolidone degradation		0	0	0	0	0	0	0	0	0	0	0	0	0	0	0	0	0	0	0	0	0	0	0	0	0	0	0	0	0	0	1	0	0	1	0	0	0	0	0	0	0	0	0	0	1	0	0	0
pectin degradation I		0	0	0	0	0	0	0	0	0	0	0	0	0	0	0	0	0	0	0	0	0	0	0	0	0	0	0	0	0	0	0	0	0	0	0	0	0	0	0	0	0	0	0	0	0	0	0	0
curcumin degradation		1	0	0	0	0	0	1	1	1	0	0	1	1	1	0	1	1	1	0	0	0	0	0	1	0	1	1	0	0	1	1	0	0	1	1	1	1	1	1	0	1	0	0	1	1	0	0	0
L-phenylalanine degradation VI (reductive Stickland reaction)		0	0	0	0	0	1	0	0	0	0	0	0	0	0	0	0	0	0	0	0	0	0	0	0	1	0	0	0	0	0	0	0	0	0	0	0	0	0	0	0	0	0	0	0	0	0	0	0
L-tryptophan biosynthesis (complex)		1	1	1	1	0	1	1	1	1	1	1	1	1	1	1	1	1	1	1	1	1	1	1	1	1	1	1	1	0	1	1	1	1	1	1	1	1	1	1	1	1	1	1	1	1	1	1	1
vancomycin resistance II		0	0	0	0	0	1	0	0	1	0	0	0	1	0	0	0	0	0	0	0	0	0	0	1	1	1	0	1	0	0	0	0	0	0	1	1	1	0	0	0	0	0	0	0	0	0	0	0
mannosylglycerate biosynthesis I		0	0	0	0	0	0	0	0	0	0	0	0	0	0	0	0	0	0	0	0	0	0	0	0	0	0	0	0	0	0	0	0	0	0	0	1	0	0	0	0	0	0	0	0	0	0	0	0
4-hydroxyacetophenone degradation		0	0	0	1	0	0	0	0	0	0	0	0	0	0	0	0	0	0	1	0	0	0	0	0	0	0	0	0	0	0	0	0	1	0	0	0	0	0	0	0	0	1	0	0	0	0	1	0
lipoprotein posttranslational modification		0	0	0	1	0	0	1	1	1	0	1	1	0	1	0	1	0	0	1	1	1	1	1	1	0	1	0	1	0	0	1	0	1	1	1	1	1	1	0	1	1	1	0	0	1	0	1	1
UDP-N-acetyl-D-galactosamine biosynthesis II		0	0	0	0	0	0	0	0	1	0	0	1	1	1	1	0	0	0	0	0	0	0	0	1	0	1	1	1	0	1	0	0	0	0	1	1	1	1	0	0	0	0	1	0	0	0	0	0
Kdo transfer to lipid IVA I (E. coli)		1	0	0	1	0	1	1	1	1	0	1	1	1	1	1	1	1	1	1	1	1	1	1	1	1	1	0	1	0	1	1	0	1	1	1	1	1	1	1	1	1	1	1	1	1	0	1	1
Kdo transfer to lipid IVA IV (P. putida)		1	0	0	1	0	1	1	1	1	0	1	1	1	1	1	1	1	1	1	1	1	1	1	1	1	1	0	1	0	1	1	0	1	1	1	1	1	1	1	1	1	1	1	1	1	0	1	1
ferroxidase		1	0	0	1	0	1	1	1	1	0	1	1	1	1	1	1	1	1	1	1	1	1	1	1	1	1	0	1	0	1	1	0	1	1	1	1	1	1	1	1	1	1	1	1	1	0	1	1
ubiquinol-8 biosynthesis (late decarboxylation)		0	0	0	0	0	1	0	0	1	0	0	0	1	1	0	0	1	0	0	0	0	0	0	1	1	1	0	1	0	1	1	0	0	1	1	1	1	1	1	0	1	0	0	1	1	0	0	0
glucosylglycerol biosynthesis	Group 31	0	0	0	0	0	0	0	0	0	0	0	0	0	0	0	0	0	0	0	0	0	0	0	1	0	0	0	0	0	1	0	0	0	0	0	0	0	0	0	0	0	0	0	0	0	0	0	0
trehalose biosynthesis II	Group 31	0	0	0	0	0	0	0	0	0	0	0	0	0	0	0	0	0	0	0	0	0	0	0	1	0	0	0	0	0	1	0	0	0	0	0	0	0	0	0	0	0	0	0	0	0	0	0	0
NAD salvage pathway I (PNC VI cycle)	Group 31	0	0	0	0	0	0	0	0	0	0	0	0	0	0	0	0	0	0	0	0	0	0	0	1	0	0	0	0	0	1	0	0	0	0	0	0	0	0	0	0	0	0	0	0	0	0	0	0
trehalose biosynthesis I	Group 31	0	0	0	0	0	0	0	0	0	0	0	0	0	0	0	0	0	0	0	0	0	0	0	1	0	0	0	0	0	1	0	0	0	0	0	0	0	0	0	0	0	0	0	0	0	0	0	0
benzoate degradation II (aerobic and anaerobic)		1	1	1	1	0	0	1	1	1	0	1	0	0	1	0	1	1	1	1	1	1	1	1	0	0	0	1	0	0	0	1	1	1	1	1	1	1	1	1	1	1	1	0	1	1	1	1	1
L-lactaldehyde degradation (anaerobic)		0	0	0	1	0	1	1	1	1	0	1	1	0	0	1	1	1	0	1	1	1	1	1	1	1	1	1	1	1	1	1	0	1	1	1	1	1	0	1	1	1	1	1	1	1	0	1	1
S-methyl-5'-thioadenosine degradation III		0	0	0	0	0	0	0	0	0	0	0	0	1	0	0	0	1	0	0	0	0	0	0	0	0	0	0	0	0	0	0	0	0	0	0	0	0	0	1	0	0	0	0	1	0	0	0	0
salmochelin biosynthesis		0	0	0	0	0	0	0	0	0	0	0	0	0	0	0	0	0	0	0	0	0	0	0	0	0	0	0	0	0	0	0	0	0	0	0	0	0	0	0	0	0	0	0	0	0	0	0	0
fatty acid biosynthesis initiation (type II)		1	1	1	0	1	1	0	0	1	1	0	1	1	1	1	0	0	1	0	0	0	0	0	1	1	1	1	1	1	1	0	1	0	0	1	1	1	1	0	0	0	0	1	0	1	1	0	0
ubiquinol-9 biosynthesis (early decarboxylation)		0	0	0	0	0	1	0	0	1	0	0	1	1	1	1	0	1	0	0	0	0	0	0	1	1	1	0	1	0	1	1	0	0	1	1	1	1	1	1	0	1	0	1	1	1	0	0	0
ubiquinol-10 biosynthesis (early decarboxylation)		0	0	0	0	0	1	0	0	1	0	0	1	1	1	1	0	1	0	0	0	0	0	0	1	1	1	0	1	0	1	1	0	0	1	1	1	1	1	1	0	1	0	1	1	1	0	0	0
ubiquinol-8 biosynthesis (early decarboxylation)		0	0	0	0	0	1	0	0	1	0	0	1	1	1	1	0	1	0	0	0	0	0	0	1	1	1	0	1	0	1	1	0	0	1	1	1	1	1	1	0	1	0	1	1	1	0	0	0
pyruvate fermentation to (R)-acetoin II		0	0	0	0	0	1	0	0	1	0	0	1	0	1	0	0	0	0	0	0	0	0	0	1	1	0	1	0	0	1	0	0	0	0	1	1	1	1	0	0	0	0	0	0	0	0	0	0
D-allose degradation		0	0	0	0	0	0	0	0	0	0	0	0	0	0	0	0	0	0	0	0	0	0	0	0	0	0	0	0	0	0	0	0	0	0	0	0	0	0	0	0	0	0	0	0	0	0	0	0
2-amino-3-carboxymuconate semialdehyde degradation to 2-hydroxypentadienoate		0	0	0	0	0	0	0	0	1	0	0	0	0	0	0	0	0	0	0	0	0	0	0	0	0	0	0	0	0	0	0	0	0	0	0	0	0	0	0	0	0	0	0	0	0	0	0	0
lipoate salvage I		0	1	1	0	0	1	0	0	1	0	0	1	0	1	1	0	0	0	0	0	0	0	0	1	1	0	1	1	0	1	0	1	0	0	1	1	1	1	0	0	0	0	1	0	0	1	0	0
pyruvate fermentation to acetate II		1	1	1	1	0	1	1	1	1	0	1	1	0	1	1	1	1	1	1	1	1	1	1	1	1	1	1	1	0	1	1	0	1	1	1	1	1	1	1	1	1	1	1	1	1	1	1	1
tetrahydromonapterin biosynthesis		0	0	0	0	0	0	0	0	1	0	0	0	0	1	0	0	0	0	0	0	0	0	0	1	0	1	0	0	0	0	0	0	0	0	1	1	1	1	0	0	0	0	0	0	0	0	0	0
pyruvate decarboxylation to acetyl CoA II		0	0	0	0	0	0	0	0	1	0	0	1	0	1	1	0	0	0	0	0	0	0	0	1	0	1	0	0	0	1	0	0	0	0	1	1	1	1	0	0	0	0	1	0	0	0	0	0
Pyruvate-ferredoxin oxidorectase to acetyl-CoA		0	0	0	0	0	0	0	0	1	0	0	1	0	1	1	0	0	0	0	0	0	0	0	1	0	1	0	0	0	1	0	0	0	0	1	1	1	1	0	0	0	0	1	0	0	0	0	0
L-arabinose degradation II		0	1	0	0	0	0	0	0	1	0	0	0	1	0	0	0	0	0	0	0	0	0	0	1	0	0	0	0	0	1	0	0	0	0	0	0	0	0	0	0	0	0	0	0	1	0	0	0
salicylate biosynthesis I		0	0	0	0	0	1	0	0	0	0	1	0	0	1	0	1	0	0	0	0	0	0	1	0	1	1	1	1	0	0	0	1	0	0	0	0	0	1	0	0	0	0	0	0	0	0	0	0
spermidine biosynthesis II		0	0	0	0	0	0	0	0	0	0	0	0	0	0	0	0	0	0	0	0	0	0	0	0	0	0	0	0	0	0	1	0	0	1	0	0	0	0	0	0	1	0	0	0	1	0	0	0
acyl-CoA hydrolysis		0	1	1	1	0	1	1	1	1	0	1	1	1	1	1	1	1	0	1	1	1	1	1	1	1	1	0	1	0	1	1	0	1	1	1	1	1	1	1	1	1	1	1	1	1	1	1	1
(R)- and (S)-3-hydroxybutanoate biosynthesis (engineered)		0	1	1	1	0	1	1	1	1	0	1	1	1	1	1	1	1	0	1	1	1	1	1	1	1	1	0	1	0	1	1	0	1	1	1	1	1	1	1	1	1	1	1	1	1	1	1	1
oleate beta-oxidation (thioesterase-dependent, yeast)		0	1	1	1	0	1	1	1	1	0	1	1	1	1	1	1	1	0	1	1	1	1	1	1	1	1	0	1	0	1	1	0	1	1	1	1	1	1	1	1	1	1	1	1	1	1	1	1
3-oxoadipate degradation		1	0	0	1	0	0	1	1	1	0	1	0	0	1	0	1	1	1	1	1	1	1	1	0	0	0	0	0	0	0	1	0	1	1	1	1	1	1	1	1	1	1	0	1	1	0	1	1
all-trans-farnesol biosynthesis		0	0	0	0	0	0	0	0	0	0	0	0	0	0	0	0	0	0	0	0	0	0	0	0	0	0	0	0	0	0	0	1	0	0	0	0	0	0	0	0	0	0	0	0	0	0	0	0
glycerol degradation V		0	0	0	0	0	1	0	0	1	0	0	1	0	1	0	0	0	0	0	0	0	0	0	0	1	1	0	0	0	0	0	0	0	0	1	1	1	1	0	0	0	0	0	0	0	0	0	0
L-glutamate degradation I		1	1	1	1	1	1	1	1	1	1	1	1	1	1	1	1	1	1	1	1	1	1	1	1	1	1	1	1	1	0	1	1	1	1	1	1	1	1	1	1	1	1	1	1	1	1	1	1
L-lyxose degradation		0	0	0	0	0	0	0	0	0	0	0	1	0	0	0	0	0	0	0	0	0	0	0	1	0	1	0	1	0	0	0	0	0	0	0	1	0	0	0	0	0	0	0	0	0	0	0	0
L-tryptophan degradation I (via anthranilate)		1	0	0	0	0	0	0	0	0	0	0	0	0	0	0	0	0	1	0	0	0	0	0	0	0	0	1	0	0	0	0	0	0	0	0	0	0	0	0	0	0	0	0	0	1	0	0	0
atrazine degradation I (aerobic)		1	0	0	0	0	0	0	0	0	0	0	1	0	0	0	0	0	1	0	0	0	0	0	0	0	0	0	0	0	0	1	0	0	1	0	0	0	0	0	0	1	0	0	0	0	0	0	0
beta-D-glucuronide and D-glucuronate degradation		0	0	1	0	0	0	0	0	0	0	0	0	0	0	0	0	0	0	0	0	0	0	0	0	0	0	0	0	0	0	0	0	0	0	0	0	0	0	0	0	0	0	0	0	0	1	0	0
assimilatory sulfate reduction III		0	1	1	0	1	0	0	0	0	1	0	0	0	0	0	0	0	0	0	0	0	0	0	0	0	0	0	0	1	0	0	0	1	0	0	0	0	0	0	1	0	0	0	0	0	1	1	0
salicylate degradation II		1	0	0	0	0	0	0	0	0	0	0	0	0	0	0	0	0	1	0	0	0	0	0	0	0	0	0	0	0	0	0	0	0	0	0	0	0	0	0	0	0	0	0	0	0	0	0	0
chlorinated phenols degradation		1	0	0	1	0	0	1	1	0	0	1	0	0	0	0	0	0	1	1	0	1	1	1	0	0	0	0	0	0	0	0	0	1	0	0	0	0	0	0	1	0	1	0	0	0	0	1	1
hydrogen sulfide biosynthesis II (mammalian)		0	1	1	0	0	0	0	0	1	0	0	0	1	1	0	0	1	0	0	0	0	0	0	1	0	1	0	0	0	1	0	0	0	0	1	1	1	1	1	0	1	0	0	1	0	1	0	0
cytochrome c biogenesis (system III type)		1	1	1	0	1	0	0	0	1	1	0	1	1	1	0	0	1	1	0	0	0	0	0	0	0	1	1	1	1	1	1	1	0	1	1	1	1	1	1	0	1	0	0	1	1	1	0	0
NADH repair (prokaryotes)		0	1	1	1	1	0	1	1	1	1	1	1	1	1	0	1	1	0	1	1	1	1	1	1	0	1	0	0	1	1	0	0	1	0	1	1	1	1	1	1	0	1	0	1	0	1	1	1
NADPH repair (prokaryotes)		0	1	1	1	1	0	1	1	1	1	1	1	1	1	0	1	1	0	1	1	1	1	1	1	0	1	0	0	1	1	0	0	1	0	1	1	1	1	1	1	0	1	0	1	0	1	1	1
taurine degradation III		0	0	0	1	0	0	0	0	0	0	0	1	0	0	0	0	1	0	1	1	1	1	0	0	0	0	0	0	0	0	1	1	1	1	0	0	0	0	1	1	1	1	0	1	1	0	1	0
L-tryptophan degradation IV (via indole-3-lactate)		0	0	0	0	0	1	0	0	1	0	0	1	1	1	1	0	1	0	0	0	0	0	0	1	1	1	0	1	0	1	1	0	0	1	1	1	1	1	1	0	1	0	1	1	1	0	0	0
trehalose biosynthesis IV		0	0	0	0	0	1	0	0	1	0	0	1	1	1	0	0	1	0	0	0	0	0	0	1	1	1	1	0	0	1	1	0	0	1	1	1	1	1	1	0	1	0	0	1	1	0	0	0
L-gulonate degradation		0	0	0	0	0	0	1	1	1	0	1	1	0	0	0	1	0	0	0	1	0	0	0	1	0	1	1	1	0	1	1	0	0	1	1	1	1	0	0	0	1	0	0	0	0	0	0	0
m-cresol degradation		1	0	0	1	0	0	0	0	0	0	0	0	0	0	0	0	0	1	1	0	0	0	0	0	0	0	0	0	0	0	0	0	0	0	0	0	0	0	0	0	0	1	0	0	0	0	0	0
acrylate degradation I		1	0	0	1	0	0	1	1	0	0	1	0	0	0	0	1	1	1	1	1	1	1	1	0	0	0	0	1	0	0	1	0	1	1	0	0	0	0	1	1	1	1	0	1	1	0	1	1
D-arabinose degradation III	Group 5	0	0	0	0	0	0	0	0	0	0	0	0	0	0	0	0	0	0	0	0	0	0	0	0	0	0	0	0	0	0	0	0	0	0	0	0	0	0	0	0	0	0	0	0	0	0	0	0
mannosylfructose biosynthesis	Group 5	0	0	0	0	0	0	0	0	0	0	0	0	0	0	0	0	0	0	0	0	0	0	0	0	0	0	0	0	0	0	0	0	0	0	0	0	0	0	0	0	0	0	0	0	0	0	0	0
L-tyrosine biosynthesis III	Group 5	0	0	0	0	0	0	0	0	0	0	0	0	0	0	0	0	0	0	0	0	0	0	0	0	0	0	0	0	0	0	0	0	0	0	0	0	0	0	0	0	0	0	0	0	0	0	0	0
D-galacturonate degradation II	Group 5	0	0	0	0	0	0	0	0	0	0	0	0	0	0	0	0	0	0	0	0	0	0	0	0	0	0	0	0	0	0	0	0	0	0	0	0	0	0	0	0	0	0	0	0	0	0	0	0
icosapentaenoate biosynthesis IV (bacteria)	Group 5	0	0	0	0	0	0	0	0	0	0	0	0	0	0	0	0	0	0	0	0	0	0	0	0	0	0	0	0	0	0	0	0	0	0	0	0	0	0	0	0	0	0	0	0	0	0	0	0
docosahexaenoate biosynthesis II (bacteria)	Group 5	0	0	0	0	0	0	0	0	0	0	0	0	0	0	0	0	0	0	0	0	0	0	0	0	0	0	0	0	0	0	0	0	0	0	0	0	0	0	0	0	0	0	0	0	0	0	0	0
gamma-resorcylate degradation I	Group 5	0	0	0	0	0	0	0	0	0	0	0	0	0	0	0	0	0	0	0	0	0	0	0	0	0	0	0	0	0	0	0	0	0	0	0	0	0	0	0	0	0	0	0	0	0	0	0	0
D-altritol and galactitol degradation	Group 5	0	0	0	0	0	0	0	0	0	0	0	0	0	0	0	0	0	0	0	0	0	0	0	0	0	0	0	0	0	0	0	0	0	0	0	0	0	0	0	0	0	0	0	0	0	0	0	0
pseudomonine biosynthesis	Group 5	0	0	0	0	0	0	0	0	0	0	0	0	0	0	0	0	0	0	0	0	0	0	0	0	0	0	0	0	0	0	0	0	0	0	0	0	0	0	0	0	0	0	0	0	0	0	0	0
homospermidine biosynthesis II	Group 5	0	0	0	0	0	0	0	0	0	0	0	0	0	0	0	0	0	0	0	0	0	0	0	0	0	0	0	0	0	0	0	0	0	0	0	0	0	0	0	0	0	0	0	0	0	0	0	0
ribitol degradation	Group 5	0	0	0	0	0	0	0	0	0	0	0	0	0	0	0	0	0	0	0	0	0	0	0	0	0	0	0	0	0	0	0	0	0	0	0	0	0	0	0	0	0	0	0	0	0	0	0	0
sulfoacetaldehyde degradation II		1	0	0	1	0	1	1	1	1	0	1	1	1	1	1	1	1	1	1	1	1	1	1	1	1	1	1	1	0	1	1	1	1	1	1	1	1	1	1	1	1	1	1	1	1	0	1	1
ADP-L-glycero-beta-D-manno-heptose biosynthesis		0	0	0	0	0	1	0	0	1	0	0	1	0	1	1	0	0	0	0	0	0	0	0	1	1	1	0	1	0	1	1	0	0	1	1	1	1	1	0	0	0	0	1	0	0	0	0	0
glucose and glucose-1-phosphate degradation		0	0	0	0	0	0	0	0	1	0	0	0	0	1	0	0	0	0	0	0	0	0	0	1	0	1	0	0	0	1	0	0	0	0	1	1	1	1	0	0	0	0	0	0	0	0	0	0
trans, trans-farnesyl diphosphate biosynthesis		1	0	0	1	0	1	1	1	1	0	0	1	1	1	1	1	1	1	1	0	1	1	1	1	1	1	1	1	0	1	1	1	1	1	1	1	1	1	1	1	1	1	1	1	1	0	1	0
choline degradation III		0	0	0	0	0	1	0	0	1	0	0	1	0	1	0	0	0	0	0	0	0	0	0	1	1	1	0	1	0	1	0	0	0	0	1	1	1	1	0	0	0	0	0	0	0	0	0	0
adenosine nucleotides degradation II		0	0	0	0	0	0	0	0	1	0	0	1	0	0	1	0	1	0	0	0	0	0	1	1	0	1	0	0	0	1	1	0	0	1	1	1	1	0	1	0	1	0	1	1	1	0	0	0
2-oxoisovalerate decarboxylation to isobutanoyl-CoA		0	0	0	0	0	0	0	0	0	0	0	0	1	0	0	0	1	0	0	0	0	0	0	0	0	0	1	0	0	0	1	1	0	1	0	0	0	0	1	0	1	0	0	1	1	0	0	0
glyoxylate cycle		1	1	1	1	1	1	1	1	1	1	1	1	1	1	0	1	1	1	1	1	1	1	1	1	1	1	0	1	1	1	1	1	1	1	1	1	1	1	1	1	1	1	0	1	1	1	1	1
chlorogenic acid degradation		0	0	0	1	0	0	0	0	0	0	1	0	0	0	0	1	0	0	1	1	0	0	1	0	0	0	0	0	0	0	0	0	0	0	0	0	0	0	0	0	0	1	0	0	0	0	0	1
2-amino-3-hydroxycyclopent-2-enone biosynthesis		0	0	0	0	0	0	0	0	0	0	0	0	0	1	0	0	0	0	0	0	0	0	0	0	0	0	1	0	0	0	0	0	0	0	0	1	0	1	0	0	0	0	0	0	0	0	0	0
thiamine diphosphate salvage I		0	0	0	0	0	0	0	0	0	0	0	0	0	0	0	0	0	0	0	0	0	0	0	1	0	0	0	0	0	1	0	0	0	0	0	0	0	0	0	0	0	0	0	0	0	0	0	0
dTDP-N-acetylthomosamine biosynthesis		0	0	0	0	0	0	0	0	0	0	0	0	0	0	0	0	0	0	0	0	0	0	0	1	0	0	0	0	0	1	0	0	0	0	0	0	0	0	0	0	0	0	0	0	0	0	0	0
fatty acid beta-oxidation V (unsaturated, odd number, di-isomerase-dependent)		1	0	0	1	1	0	1	1	0	1	1	0	1	0	0	1	1	1	1	1	1	1	1	0	0	1	0	0	1	0	1	1	1	1	0	0	0	0	1	1	1	1	0	1	1	0	1	1
4-amino-2-methyl-5-diphosphomethylpyrimidine biosynthesis I		0	0	0	0	0	1	0	0	1	0	0	1	0	1	1	0	0	0	0	0	0	0	0	1	1	1	0	1	0	1	0	0	0	0	1	1	1	1	0	0	0	0	1	0	0	0	0	0
phytol degradation		1	0	0	1	0	0	0	0	1	0	1	0	1	1	0	1	1	1	1	1	1	1	1	1	0	1	0	1	0	0	0	1	1	0	1	1	1	1	1	1	0	1	0	1	1	0	1	1
nitrate reduction VIIIb (dissimilatory)		0	0	0	1	0	1	0	0	1	0	0	1	0	1	1	0	0	0	0	0	0	0	0	1	1	0	0	1	0	1	0	0	0	0	1	1	1	1	0	0	0	1	1	0	0	0	0	0
uracil degradation I (reductive)		0	0	0	0	0	0	0	0	0	0	0	0	0	0	0	0	1	0	0	0	0	0	0	0	0	1	0	0	0	0	1	0	0	1	0	0	0	0	1	0	1	0	0	1	1	0	0	0
thymine degradation		0	0	0	0	0	0	0	0	0	0	0	0	0	0	0	0	1	0	0	0	0	0	0	0	0	1	0	0	0	0	1	0	0	1	0	0	0	0	1	0	1	0	0	1	1	0	0	0
2-deoxy-D-ribose degradation I		0	0	0	0	0	1	0	0	0	0	0	0	0	0	0	0	0	0	0	0	0	0	0	0	1	0	0	1	0	0	0	0	0	0	0	0	0	0	0	0	0	0	0	0	0	0	0	0
chitin deacetylation		1	0	0	0	1	0	0	0	1	1	1	0	0	1	0	1	1	1	0	1	1	1	1	1	0	0	0	0	1	0	1	0	1	1	1	1	1	1	1	1	1	0	0	1	1	0	1	1
nicotinate degradation I		0	0	0	0	0	0	0	0	1	0	0	0	0	0	0	0	0	0	0	0	1	1	0	0	0	0	0	0	0	0	1	0	1	1	1	1	1	0	0	1	0	0	0	0	0	0	1	0
fatty acid biosynthesis initiation (mitochondria)		0	0	0	0	0	0	0	0	1	0	1	0	0	1	0	1	1	0	0	0	0	0	1	0	0	1	0	1	0	1	1	0	0	1	1	1	1	1	1	0	1	0	0	1	1	0	0	1
androstenedione degradation I (aerobic)		1	0	0	0	0	0	0	0	0	0	0	0	0	0	0	0	0	1	0	0	0	0	0	0	0	0	0	0	0	0	1	0	0	1	0	0	0	0	0	0	0	0	0	0	0	0	0	0
dimethylsulfoniopropanoate degradation I (cleavage)		0	0	0	0	0	0	0	0	0	0	0	0	0	0	0	0	0	0	0	0	0	0	1	0	0	0	0	0	0	0	1	0	0	1	0	0	0	0	0	0	0	0	0	0	0	0	0	0
fructan biosynthesis		0	0	0	0	0	0	0	0	0	0	1	0	1	0	0	0	1	0	0	0	0	0	1	0	0	0	0	0	1	0	1	0	0	1	0	0	0	0	1	0	0	0	0	1	0	0	0	1
lipid IVA biosynthesis (E. coli)		1	1	1	1	0	1	1	1	1	0	1	1	1	1	1	1	1	1	1	1	1	1	1	1	1	1	0	1	0	1	1	0	1	1	1	1	1	1	1	1	1	1	1	1	1	1	1	1
lipid IVA biosynthesis (P. putida)		1	1	1	1	0	1	1	1	1	0	1	1	1	1	1	1	1	1	1	1	1	1	1	1	1	1	0	1	0	1	1	0	1	1	1	1	1	1	1	1	1	1	1	1	1	1	1	1
UDP-&alpha;-D-galacturonate biosynthesis I (from UDP-D-glucuronate)		1	1	1	0	1	1	0	0	1	1	0	0	1	1	1	0	1	1	0	1	1	1	0	1	1	1	1	1	1	1	1	0	1	1	1	1	1	1	1	1	1	0	1	1	1	1	1	0
seleno-amino acid detoxification and volatilization III		0	0	0	0	0	0	0	0	0	0	1	0	0	0	0	1	1	0	0	0	0	0	1	0	0	0	0	0	0	0	1	0	0	1	0	0	0	0	1	0	0	0	0	1	1	0	0	1
5-(methoxycarbonylmethoxy)uridine biosynthesis		0	0	0	0	0	1	0	0	1	0	0	1	0	1	1	0	1	0	0	0	0	0	0	1	1	1	0	1	0	1	1	0	0	1	1	1	1	1	1	0	1	0	1	1	1	0	0	0
CDP-diacylglycerol biosynthesis I		0	0	0	0	0	1	0	0	1	0	0	1	0	1	1	0	1	0	0	0	0	0	0	1	1	1	0	1	0	1	1	0	0	1	1	1	1	1	1	0	1	0	1	1	1	0	0	0
thiazole component of thiamine diphosphate biosynthesis I		0	0	0	0	0	1	0	0	1	0	0	1	0	1	1	0	1	0	0	0	0	0	0	1	1	1	0	1	0	1	0	0	0	0	1	1	1	1	1	0	1	0	1	1	0	0	0	0
xanthine and xanthosine salvage		0	1	1	0	0	1	0	0	1	0	0	1	0	1	1	0	1	0	0	0	0	0	0	1	1	1	1	1	0	1	1	1	0	1	1	1	1	1	1	0	1	0	1	1	1	1	0	0
malonate degradation II (biotin-dependent)		0	0	0	0	0	0	0	0	0	0	0	0	0	0	0	0	0	0	0	0	0	0	0	0	0	0	0	0	0	0	0	0	0	0	0	0	0	0	0	0	0	0	0	0	0	0	0	0
Escherichia coli serotype O9a O-antigen biosynthesis		0	0	0	0	0	0	0	0	0	0	0	0	0	0	0	0	0	0	0	0	0	0	0	0	0	0	0	0	0	0	0	0	0	0	0	0	0	0	0	0	0	0	0	0	0	0	0	0
(S)-lactate fermentation to propanoate, acetate and hydrogen		0	0	0	0	0	0	0	0	0	0	0	0	0	0	0	0	0	0	0	0	0	0	0	0	0	0	0	0	0	0	0	0	0	0	0	0	0	0	0	0	0	0	0	0	0	0	0	0
D-serine degradation		1	0	0	0	0	1	0	0	1	0	1	1	0	1	1	1	0	1	0	1	1	1	1	1	1	1	0	1	0	0	1	1	1	1	1	1	1	1	0	1	1	0	1	0	0	0	1	1
D-fructuronate degradation		0	0	0	0	0	0	0	0	1	0	0	1	0	1	1	0	0	0	0	0	0	0	0	1	0	1	0	1	0	1	0	0	0	0	1	1	1	1	0	0	0	0	1	0	0	0	0	0
biotin-carboxyl carrier protein assembly		0	0	0	0	0	1	0	0	1	0	0	1	0	1	1	0	1	0	0	0	0	0	0	1	1	1	1	1	0	1	0	1	0	0	1	1	1	1	1	0	1	0	1	1	1	0	0	0
pyruvate fermentation to (S)-lactate		0	0	0	0	0	0	0	0	0	0	0	0	0	0	0	0	0	0	0	0	0	0	0	0	0	0	1	0	0	1	0	1	0	0	0	0	0	0	0	0	0	0	0	0	0	0	0	0
triacylglycerol degradation		0	0	0	0	0	0	0	0	0	0	0	0	0	0	0	1	0	0	0	0	0	0	1	0	0	0	0	0	0	0	0	0	0	0	0	0	0	0	0	0	0	0	0	0	0	0	0	0
nonaprenyl diphosphate biosynthesis I		1	1	1	1	0	1	1	1	1	0	1	1	1	1	1	1	1	1	1	1	1	1	1	1	1	1	0	1	0	1	1	0	1	1	1	1	1	1	1	1	1	1	1	1	1	1	1	1
L-leucine degradation I		1	1	1	1	1	1	1	1	1	1	1	1	1	1	0	1	1	1	1	1	1	1	1	1	1	1	1	1	1	1	1	1	1	1	1	1	1	1	1	1	1	1	0	1	1	1	1	1
glycerol degradation III		0	0	0	0	0	0	0	0	0	0	0	0	0	0	0	0	0	0	0	0	0	0	0	0	0	1	0	0	0	0	0	0	0	0	0	0	0	0	0	0	0	0	0	0	0	0	0	0
(S)-propane-1,2-diol degradation		0	0	0	0	0	0	0	0	0	0	0	0	0	0	0	0	0	0	0	0	0	0	0	0	0	1	0	0	0	0	0	0	0	0	0	0	0	0	0	0	0	0	0	0	0	0	0	0
1,3-propanediol biosynthesis (engineered)		0	0	0	0	0	0	0	0	0	0	0	0	0	0	0	0	0	0	0	0	0	0	0	0	0	1	0	0	0	0	0	0	0	0	0	0	0	0	0	0	0	0	0	0	0	0	0	0
glutathionylspermidine biosynthesis		0	1	1	0	0	1	0	0	1	0	0	1	1	1	1	1	1	0	0	0	0	0	1	1	1	1	0	1	0	1	0	0	0	0	1	1	1	1	1	0	1	0	1	1	1	1	0	0
trypanothione biosynthesis		0	1	1	0	0	1	0	0	1	0	0	1	1	1	1	1	1	0	0	0	0	0	1	1	1	1	0	1	0	1	0	0	0	0	1	1	1	1	1	0	1	0	1	1	1	1	0	0
L-tryptophan degradation to 2-amino-3-carboxymuconate semialdehyde		0	0	0	0	0	0	0	0	0	0	0	0	1	0	0	0	0	0	0	0	0	0	0	0	0	0	0	0	0	0	0	0	0	0	0	0	0	0	0	0	0	0	0	0	0	0	0	0
crepenynate biosynthesis	Group 36	0	0	0	0	0	0	0	0	0	0	0	0	0	0	0	0	0	0	0	0	0	0	0	0	0	0	0	0	0	0	0	0	0	0	0	0	0	0	0	0	0	0	0	0	0	0	0	0
rhamnogalacturonan type I degradation II (bacteria)	Group 36	0	0	0	0	0	0	0	0	0	0	0	0	0	0	0	0	0	0	0	0	0	0	0	0	0	0	0	0	0	0	0	0	0	0	0	0	0	0	0	0	0	0	0	0	0	0	0	0
heparin degradation	Group 36	0	0	0	0	0	0	0	0	0	0	0	0	0	0	0	0	0	0	0	0	0	0	0	0	0	0	0	0	0	0	0	0	0	0	0	0	0	0	0	0	0	0	0	0	0	0	0	0
heparan sulfate degradation	Group 36	0	0	0	0	0	0	0	0	0	0	0	0	0	0	0	0	0	0	0	0	0	0	0	0	0	0	0	0	0	0	0	0	0	0	0	0	0	0	0	0	0	0	0	0	0	0	0	0
beta-alanine biosynthesis I		0	0	0	1	0	0	0	0	0	0	1	1	0	0	0	1	0	0	1	1	0	0	1	1	0	0	0	0	0	0	0	0	1	0	0	0	0	0	0	1	0	1	0	0	0	0	1	1
phosphopantothenate biosynthesis I		1	0	0	0	0	1	0	0	1	0	0	1	0	1	0	0	1	1	0	0	0	0	0	1	1	1	0	1	0	1	1	0	0	1	1	1	1	1	1	0	1	0	0	1	1	0	0	0
sulfur oxidation I (aerobic)		0	0	0	0	0	0	0	0	0	0	1	0	0	0	0	1	0	0	0	0	0	0	1	0	0	0	0	0	0	0	0	1	0	0	0	0	0	0	0	0	0	0	0	0	0	0	0	1
pyruvate to cytochrome bo oxidase electron transfer		1	1	1	1	1	1	0	0	1	1	0	1	1	1	1	0	1	1	1	0	0	0	1	1	1	1	1	1	1	1	1	1	0	1	1	1	1	1	1	0	1	1	1	1	1	1	0	0
GDP-mannose biosynthesis		1	0	0	0	0	0	0	0	1	0	0	0	1	1	0	0	1	1	0	0	0	0	0	1	0	0	0	0	0	1	0	0	0	0	1	1	1	1	1	0	1	0	0	1	1	0	0	0
homospermidine biosynthesis I		0	1	1	0	1	0	0	0	0	1	0	0	0	0	0	0	0	0	0	0	0	0	0	0	0	0	0	0	1	0	0	0	0	0	0	0	0	0	0	0	0	0	0	0	0	1	0	0
folate transformations III (E. coli)		0	0	0	1	0	1	0	0	1	0	0	1	1	1	1	0	1	0	1	0	0	0	0	1	1	1	0	1	0	1	1	1	0	1	1	1	1	1	1	0	1	1	1	1	1	0	0	0
folate transformations II (plants)		0	0	0	1	0	1	0	0	1	0	0	1	1	1	1	0	1	0	1	0	0	0	0	1	1	1	0	1	0	1	1	1	0	1	1	1	1	1	1	0	1	1	1	1	1	0	0	0
polymyxin resistance		0	0	0	0	0	1	0	0	1	0	0	1	0	1	1	0	1	0	0	0	0	0	0	1	1	1	0	1	0	0	0	0	0	0	1	1	1	1	1	0	0	0	1	1	1	0	0	0
arginine deiminase test		0	0	0	0	0	0	0	0	0	0	0	0	0	0	0	0	1	0	0	0	0	0	0	1	0	1	0	0	0	1	1	0	0	1	0	0	0	0	1	0	1	0	0	1	1	0	0	0
(S,S)-butanediol degradation		0	0	0	1	0	0	0	0	1	0	1	0	0	1	1	1	0	0	1	0	1	1	1	1	0	0	0	1	0	1	0	0	1	0	1	1	1	1	0	1	0	1	1	0	0	0	1	1
(S,S)-butanediol biosynthesis		0	0	0	1	0	0	0	0	1	0	1	0	0	1	1	1	0	0	1	0	1	1	1	1	0	0	0	1	0	1	0	0	1	0	1	1	1	1	0	1	0	1	1	0	0	0	1	1
meso-butanediol biosynthesis I		0	0	0	1	0	0	0	0	1	0	1	0	0	1	1	1	0	0	1	0	1	1	1	1	0	0	0	1	0	1	0	0	1	0	1	1	1	1	0	1	0	1	1	0	0	0	1	1
indigo biosynthesis		0	0	0	1	0	0	1	1	0	0	0	0	0	0	0	0	0	0	1	1	0	0	0	0	0	0	0	0	0	0	1	0	0	1	0	0	0	0	0	1	0	1	0	0	1	0	0	1
baumannoferrin biosynthesis		0	0	0	0	0	0	0	0	0	0	0	0	0	0	0	1	0	0	0	1	1	1	0	0	0	0	0	0	0	0	0	0	0	0	0	0	0	0	0	1	0	0	0	0	0	0	0	0
L-lyxonate degradation		1	0	0	0	0	0	1	1	0	0	0	0	0	0	0	1	1	1	0	0	0	0	0	0	0	0	0	0	0	0	1	0	0	1	0	0	0	0	1	0	1	0	0	1	0	0	0	0
benzoyl-CoA degradation III (anaerobic)		1	0	0	1	0	0	0	0	0	0	0	0	0	0	0	0	0	1	1	0	0	0	0	0	0	0	0	0	0	0	1	0	0	1	0	0	0	0	0	0	0	0	0	0	1	0	0	0
guanosine nucleotides degradation II		1	0	0	0	0	0	0	0	1	0	0	1	0	0	1	0	1	1	0	0	0	0	1	1	0	0	0	0	0	0	1	0	0	1	1	1	1	0	1	0	1	0	1	1	1	0	0	0
nitrate reduction III (dissimilatory)		0	0	0	0	0	1	0	0	1	0	0	1	0	1	1	0	0	0	0	0	0	0	0	1	1	0	0	1	0	1	0	0	0	0	1	1	1	1	0	0	0	0	1	0	0	0	0	0
prodigiosin biosynthesis		0	0	0	0	0	0	0	0	0	0	0	0	0	0	0	0	0	0	0	0	0	0	0	0	0	0	0	0	0	0	0	0	0	0	0	0	0	0	0	0	0	0	0	0	0	0	0	0
(R,R)-butanediol degradation		0	0	0	1	0	0	1	1	0	0	1	0	0	0	0	1	1	0	1	0	1	1	1	0	0	0	0	0	0	0	1	1	1	1	0	0	0	0	1	1	1	1	0	1	1	0	1	1
(R,R)-butanediol biosynthesis		0	0	0	1	0	0	1	1	0	0	1	0	0	0	0	1	1	0	1	0	1	1	1	0	0	0	0	0	0	0	1	1	1	1	0	0	0	0	1	1	1	1	0	1	1	0	1	1
putrescine degradation V		1	0	0	1	0	1	1	1	1	0	0	1	0	1	1	0	1	1	1	0	1	1	0	1	1	1	0	1	0	1	1	0	0	1	1	1	1	1	1	1	1	1	1	1	1	0	0	0
catechol degradation to 2-hydroxypentadienoate I		1	0	0	0	0	0	0	0	0	0	0	0	0	0	0	0	0	1	0	0	0	0	0	0	0	0	0	0	0	0	0	0	0	0	0	0	0	0	0	0	0	0	0	0	0	0	0	0
catechol degradation to 2-hydroxypentadienoate II		1	0	0	0	0	0	0	0	0	0	0	0	0	0	0	0	0	1	0	0	0	0	0	0	0	0	0	0	0	0	0	0	0	0	0	0	0	0	0	0	0	0	0	0	0	0	0	0
3-chlorocatechol degradation III (meta pathway)		1	0	0	0	0	0	0	0	0	0	0	0	0	0	0	0	0	1	0	0	0	0	0	0	0	0	0	0	0	0	0	0	0	0	0	0	0	0	0	0	0	0	0	0	0	0	0	0
2-aminoethylphosphonate biosynthesis		0	0	0	0	0	0	0	0	0	0	0	0	0	0	0	0	0	0	0	0	0	0	0	0	0	0	0	0	0	0	0	0	0	0	0	0	0	0	0	0	0	0	0	0	0	0	0	0
methylgallate degradation	Group 33	1	0	0	0	0	0	0	0	0	0	0	0	0	0	0	0	0	1	0	0	0	0	0	0	0	0	0	0	0	0	0	0	0	0	0	0	0	0	0	0	0	0	0	0	0	0	0	0
protocatechuate degradation I (meta-cleavage pathway)	Group 33	1	0	0	0	0	0	0	0	0	0	0	0	0	0	0	0	0	1	0	0	0	0	0	0	0	0	0	0	0	0	0	0	0	0	0	0	0	0	0	0	0	0	0	0	0	0	0	0
3-chlorobenzoate degradation II (via protocatechuate)	Group 33	1	0	0	0	0	0	0	0	0	0	0	0	0	0	0	0	0	1	0	0	0	0	0	0	0	0	0	0	0	0	0	0	0	0	0	0	0	0	0	0	0	0	0	0	0	0	0	0
3,4-dichlorobenzoate degradation	Group 33	1	0	0	0	0	0	0	0	0	0	0	0	0	0	0	0	0	1	0	0	0	0	0	0	0	0	0	0	0	0	0	0	0	0	0	0	0	0	0	0	0	0	0	0	0	0	0	0
tetrahydrofolate biosynthesis		1	1	1	1	0	1	1	1	1	0	1	1	1	1	1	1	1	1	1	1	1	1	1	1	1	1	1	1	0	1	1	1	1	1	1	1	1	1	1	1	1	1	1	1	1	1	1	1
Folate biosynthesis from GTP and 4-aminobenzoate via dihydropterin-3-triphosphate		1	1	1	1	0	1	1	1	1	0	1	1	1	1	1	1	1	1	1	1	1	1	1	1	1	1	1	1	0	1	1	1	1	1	1	1	1	1	1	1	1	1	1	1	1	1	1	1
N-acetyl-D-galactosamine degradation		0	0	0	0	0	0	0	0	1	0	0	0	0	1	1	0	0	0	0	0	0	0	0	0	0	1	0	1	0	0	0	0	0	0	1	1	1	1	0	0	0	0	1	0	0	0	0	0
(Kdo)2-lipid A biosynthesis I (E. coli)	Group 4	0	0	0	0	0	1	0	0	1	0	0	1	0	1	1	0	0	0	0	0	0	0	0	1	1	1	0	1	0	1	0	0	0	0	1	1	1	1	0	0	0	0	1	0	0	0	0	0
CDP-diacylglycerol biosynthesis II	Group 4	0	0	0	0	0	1	0	0	1	0	0	1	0	1	1	0	0	0	0	0	0	0	0	1	1	1	0	1	0	1	0	0	0	0	1	1	1	1	0	0	0	0	1	0	0	0	0	0
folate transformations I	Group 4	0	0	0	0	0	1	0	0	1	0	0	1	0	1	1	0	0	0	0	0	0	0	0	1	1	1	0	1	0	1	0	0	0	0	1	1	1	1	0	0	0	0	1	0	0	0	0	0
NAD salvage pathway IV (from nicotinamide riboside)	Group 4	0	0	0	0	0	1	0	0	1	0	0	1	0	1	1	0	0	0	0	0	0	0	0	1	1	1	0	1	0	1	0	0	0	0	1	1	1	1	0	0	0	0	1	0	0	0	0	0
acyl-[acyl-carrier protein] thioesterase pathway	Group 4	0	0	0	0	0	1	0	0	1	0	0	1	0	1	1	0	0	0	0	0	0	0	0	1	1	1	0	1	0	1	0	0	0	0	1	1	1	1	0	0	0	0	1	0	0	0	0	0
cis-vaccenate biosynthesis	Group 4	0	0	0	0	0	1	0	0	1	0	0	1	0	1	1	0	0	0	0	0	0	0	0	1	1	1	0	1	0	1	0	0	0	0	1	1	1	1	0	0	0	0	1	0	0	0	0	0
palmitoleate biosynthesis I (from (5Z)-dodec-5-enoate)	Group 4	0	0	0	0	0	1	0	0	1	0	0	1	0	1	1	0	0	0	0	0	0	0	0	1	1	1	0	1	0	1	0	0	0	0	1	1	1	1	0	0	0	0	1	0	0	0	0	0
adenine and adenosine salvage V	Group 4	0	0	0	0	0	1	0	0	1	0	0	1	0	1	1	0	0	0	0	0	0	0	0	1	1	1	0	1	0	1	0	0	0	0	1	1	1	1	0	0	0	0	1	0	0	0	0	0
guanine and guanosine salvage III	Group 4	0	0	0	0	0	1	0	0	1	0	0	1	0	1	1	0	0	0	0	0	0	0	0	1	1	1	0	1	0	1	0	0	0	0	1	1	1	1	0	0	0	0	1	0	0	0	0	0
pyrimidine deoxyribonucleotides de novo biosynthesis II	Group 4	0	0	0	0	0	1	0	0	1	0	0	1	0	1	1	0	0	0	0	0	0	0	0	1	1	1	0	1	0	1	0	0	0	0	1	1	1	1	0	0	0	0	1	0	0	0	0	0
pyridoxal 5'-phosphate salvage II (plants)	Group 4	0	0	0	0	0	1	0	0	1	0	0	1	0	1	1	0	0	0	0	0	0	0	0	1	1	1	0	1	0	1	0	0	0	0	1	1	1	1	0	0	0	0	1	0	0	0	0	0
molybdenum cofactor biosynthesis	Group 4	0	0	0	0	0	1	0	0	1	0	0	1	0	1	1	0	0	0	0	0	0	0	0	1	1	1	0	1	0	1	0	0	0	0	1	1	1	1	0	0	0	0	1	0	0	0	0	0
thiazole biosynthesis I (facultative anaerobic bacteria) with tautomerase	Group 4	0	0	0	0	0	1	0	0	1	0	0	1	0	1	1	0	0	0	0	0	0	0	0	1	1	1	0	1	0	1	0	0	0	0	1	1	1	1	0	0	0	0	1	0	0	0	0	0
tRNA processing		0	0	0	1	0	1	1	1	1	0	1	1	1	1	1	1	1	0	1	1	1	1	1	1	1	1	0	1	0	1	1	0	1	1	1	1	1	1	1	1	1	1	1	1	1	0	1	1
sulfide oxidation I (to sulfur globules)		0	0	0	0	0	0	0	0	0	0	1	0	0	1	0	1	1	0	0	0	0	0	1	0	0	0	0	0	0	0	1	0	0	1	0	0	0	1	1	0	1	0	0	1	1	0	0	1
gentisate degradation I		1	0	0	1	0	0	0	0	0	0	1	0	0	0	0	0	0	1	1	0	0	0	1	0	0	0	0	0	0	0	0	0	0	0	0	0	0	0	0	0	0	1	0	0	0	0	0	0
L-glutamate biosynthesis II		1	1	1	1	1	1	1	1	1	1	1	1	0	1	1	1	1	1	1	1	1	1	1	1	1	1	1	1	1	0	1	1	1	1	1	1	1	1	1	1	1	1	1	1	1	1	1	1
L-glutamate degradation X		1	1	1	1	1	1	1	1	1	1	1	1	0	1	1	1	1	1	1	1	1	1	1	1	1	1	1	1	1	0	1	1	1	1	1	1	1	1	1	1	1	1	1	1	1	1	1	1
isoniazid activation		1	1	1	1	1	0	0	0	1	1	1	0	1	1	0	1	1	1	1	0	0	0	1	1	0	0	0	0	1	1	1	0	0	1	1	1	1	1	1	0	1	1	0	1	1	1	0	1
NADH:menaquinone6 oxidoreductase		1	0	0	1	0	1	1	1	1	0	1	1	1	1	1	1	1	1	1	1	1	1	1	1	1	1	0	1	0	1	1	0	1	1	1	1	1	1	1	1	1	1	1	1	1	0	1	1
2-methylcitrate cycle I		0	0	0	0	0	0	0	0	0	0	0	0	1	1	1	0	1	0	0	0	0	0	0	0	0	0	0	1	1	0	1	0	0	1	0	0	0	1	1	0	1	0	1	1	1	0	0	0
L-galactonate degradation		0	0	0	0	0	0	0	0	1	0	0	0	0	0	0	0	0	0	0	0	0	0	0	0	0	1	0	1	0	0	0	0	0	0	1	1	1	0	0	0	0	0	0	0	0	0	0	0
starch degradation V		0	0	0	0	0	0	0	0	1	0	0	1	0	1	0	0	1	0	0	0	0	0	0	1	0	1	0	0	0	1	1	0	0	1	1	1	1	1	1	0	1	0	0	1	1	0	0	0
L-ornithine biosynthesis II		1	0	0	1	0	1	1	1	1	0	1	1	0	1	1	1	1	1	1	1	1	1	1	1	1	1	0	1	0	0	1	1	1	1	1	1	1	1	1	1	1	1	1	1	1	0	1	1
2-aminoethylphosphonate degradation I		0	0	0	1	0	0	0	0	0	0	0	0	0	1	0	1	1	0	1	0	0	0	1	0	0	1	0	1	0	0	1	1	1	1	0	0	0	1	1	1	1	1	0	1	1	0	1	0
pyrimidine ribonucleosides salvage I		0	1	1	0	0	1	0	0	1	0	0	1	0	1	1	0	0	0	0	0	0	0	0	1	1	1	1	1	0	1	0	1	0	0	1	1	1	1	0	0	0	0	1	0	0	1	0	0
ethene biosynthesis I (plants)		1	0	0	0	0	0	0	0	0	0	0	0	0	0	0	0	1	1	0	0	0	0	0	0	0	0	0	0	0	0	0	0	0	0	0	0	0	0	0	0	0	0	0	0	1	0	0	0
NAD biosynthesis from 2-amino-3-carboxymuconate semialdehyde		0	0	0	1	0	0	1	1	1	0	1	1	1	1	0	1	1	0	1	0	0	1	1	1	0	1	1	1	0	1	1	1	1	1	1	1	1	1	1	1	1	1	0	1	1	0	1	1
L-threonine degradation IV		1	0	0	1	0	1	1	1	1	0	0	1	0	1	1	0	0	1	1	0	1	1	0	1	1	1	1	1	0	1	1	0	0	1	1	1	1	1	0	0	1	1	1	0	0	0	0	0
NADH to cytochrome bo oxidase electron transfer II		1	0	0	1	0	1	1	1	1	0	1	1	0	1	1	1	1	1	1	1	1	1	1	1	1	1	0	1	0	1	1	0	1	1	1	1	1	1	1	1	1	1	1	1	1	0	1	1
NADH to cytochrome bd oxidase electron transfer II		1	0	0	1	0	1	1	1	1	0	1	1	0	1	1	1	1	1	1	1	1	1	1	1	1	1	0	1	0	1	1	0	1	1	1	1	1	1	1	1	1	1	1	1	1	0	1	1
L-lysine biosynthesis II		0	0	0	0	0	0	0	0	0	0	0	0	0	0	0	0	0	0	0	0	0	0	0	0	0	0	1	0	0	0	0	1	0	0	0	0	0	0	0	0	0	0	0	0	0	0	0	0
L-asparagine degradation III (mammalian)		0	1	1	0	1	0	0	0	0	1	0	0	0	0	0	0	0	0	0	0	0	0	0	0	0	0	0	0	1	0	0	0	0	0	0	0	0	0	0	0	0	0	0	0	0	1	0	0
L-lysine degradation VI		0	1	1	0	1	0	0	0	0	1	0	0	0	0	0	0	0	0	0	0	0	0	0	0	0	0	0	0	1	0	0	0	0	0	0	0	0	0	0	0	0	0	0	0	0	1	0	0
1,2,4,5-tetrachlorobenzene degradation		1	0	0	1	0	0	1	1	0	0	0	0	0	0	0	1	0	1	1	0	0	0	0	0	0	0	0	0	0	0	0	0	0	0	0	0	0	0	0	0	1	1	0	0	0	0	0	0
guanylyl molybdenum cofactor biosynthesis		0	0	0	0	0	1	1	1	1	0	1	1	0	1	1	1	1	0	0	1	1	1	1	1	1	1	0	1	0	1	1	0	1	1	1	1	1	1	1	1	1	0	1	1	1	0	1	1
bis(guanylyl molybdenum cofactor) biosynthesis		0	0	0	0	0	1	1	1	1	0	1	1	0	1	1	1	1	0	0	1	1	1	1	1	1	1	0	1	0	1	1	0	1	1	1	1	1	1	1	1	1	0	1	1	1	0	1	1
bis(guanylyl tungstenpterin) cofactor biosynthesis		0	0	0	0	0	1	1	1	1	0	1	1	0	1	1	1	1	0	0	1	1	1	1	1	1	1	0	1	0	1	1	0	1	1	1	1	1	1	1	1	1	0	1	1	1	0	1	1
2,3-cis-flavanols biosynthesis		0	0	0	0	0	0	1	1	0	0	0	0	0	0	0	0	0	0	0	1	1	1	0	0	0	0	0	0	0	0	0	0	1	0	0	0	0	0	0	1	0	0	0	0	0	0	1	0
beta-alanine biosynthesis III		1	0	0	1	0	1	1	1	1	0	1	1	1	1	0	1	1	1	1	1	1	1	1	1	1	1	1	1	0	1	0	0	1	0	1	1	1	1	1	1	0	1	0	1	0	0	1	1
Entner-Doudoroff pathway III (semi-phosphorylative)		0	0	0	0	0	0	0	0	1	0	0	1	0	0	0	0	1	0	0	0	0	0	0	1	0	1	0	0	0	1	1	0	0	1	1	1	1	0	1	0	0	0	0	1	1	0	0	0
paraoxon degradation		0	0	0	0	0	1	0	0	1	0	0	1	1	1	1	0	0	0	0	0	0	0	0	1	1	1	0	1	0	1	0	0	0	0	1	1	1	1	0	0	0	0	1	0	0	0	0	0
8-amino-7-oxononanoate biosynthesis I		0	0	0	0	0	1	0	0	1	0	0	1	1	1	1	0	0	0	0	0	0	0	0	1	1	1	0	1	0	1	0	0	0	0	1	1	1	1	0	0	0	0	1	0	0	0	0	0
5'-deoxyadenosine degradation I		0	0	0	0	0	0	0	0	1	0	0	1	1	1	1	0	1	0	0	0	0	0	0	1	0	1	0	0	0	1	1	0	0	1	1	1	1	1	1	0	1	0	1	1	1	0	0	0
ethanol degradation I		1	0	0	1	0	1	1	1	1	0	0	1	0	1	1	0	0	1	1	0	1	1	0	1	1	1	0	1	0	1	1	0	0	1	1	1	1	1	0	0	1	1	1	0	0	0	0	0
NAD salvage pathway V (PNC V cycle)		0	0	0	1	0	1	1	1	1	0	1	1	1	1	1	1	1	0	1	0	0	0	1	1	1	1	1	1	0	1	0	1	1	0	1	1	1	1	1	1	0	1	1	1	1	0	1	1
partial TCA cycle (obligate autotrophs)		1	1	1	1	1	1	1	1	1	1	1	1	1	1	1	1	1	1	1	1	1	1	1	1	1	1	0	1	1	1	1	0	1	1	1	1	1	1	1	1	1	1	1	1	1	1	1	1
trehalose degradation I (low osmolarity)		0	0	0	0	0	0	0	0	1	0	0	1	1	1	0	0	1	0	0	0	0	0	0	1	0	1	1	0	0	1	1	0	0	1	1	1	1	1	1	0	1	0	0	1	1	0	0	0
glycogen degradation II		0	0	0	0	1	0	0	0	1	1	0	1	0	1	0	0	1	0	0	0	0	0	0	1	0	1	0	0	1	1	1	0	0	1	1	1	1	1	1	0	1	0	0	1	1	0	0	0
hydrogen oxidation I (aerobic)	Group 32	0	0	0	0	0	1	0	0	0	0	0	1	0	0	1	0	0	0	0	0	0	0	0	0	1	1	0	1	0	0	0	0	0	0	0	0	0	0	0	0	0	0	1	0	0	0	0	0
hydrogen to fumarate electron transfer	Group 32	0	0	0	0	0	1	0	0	0	0	0	1	0	0	1	0	0	0	0	0	0	0	0	0	1	1	0	1	0	0	0	0	0	0	0	0	0	0	0	0	0	0	1	0	0	0	0	0
hydrogen to dimethyl sulfoxide electron transfer	Group 32	0	0	0	0	0	1	0	0	0	0	0	1	0	0	1	0	0	0	0	0	0	0	0	0	1	1	0	1	0	0	0	0	0	0	0	0	0	0	0	0	0	0	1	0	0	0	0	0
hydrogen to trimethylamine N-oxide electron transfer	Group 32	0	0	0	0	0	1	0	0	0	0	0	1	0	0	1	0	0	0	0	0	0	0	0	0	1	1	0	1	0	0	0	0	0	0	0	0	0	0	0	0	0	0	1	0	0	0	0	0
thiosulfate disproportionation II (cytochrome)		0	0	0	0	0	1	0	0	0	0	0	0	0	0	0	0	0	0	0	0	0	0	0	0	1	0	0	0	0	0	0	0	0	0	0	0	0	0	0	0	0	0	0	0	0	0	0	0
thiosulfate disproportionation III (quinone)		0	0	0	0	0	1	0	0	0	0	0	0	0	0	0	0	0	0	0	0	0	0	0	0	1	0	0	0	0	0	0	0	0	0	0	0	0	0	0	0	0	0	0	0	0	0	0	0
cyanide detoxification I		0	0	0	0	0	0	0	0	0	0	0	0	0	0	0	0	1	0	0	0	0	0	0	0	0	0	0	0	0	0	0	0	0	0	0	0	0	0	1	0	0	0	0	1	1	0	0	0
UDP-N-acetylmuramoyl-pentapeptide biosynthesis II (lysine-containing)		1	1	1	1	1	1	1	1	1	1	1	1	1	1	1	1	1	1	1	1	1	1	1	1	1	1	1	1	1	1	1	1	1	1	1	1	1	1	1	1	1	1	1	1	1	1	1	1
alginate biosynthesis I (algal)		0	0	0	0	0	0	0	0	0	0	0	0	0	0	0	0	1	0	0	0	0	0	0	0	0	0	0	0	0	0	1	0	0	1	0	0	0	0	1	0	1	0	0	1	1	0	0	0
L-alanine degradation IV		0	1	1	0	1	0	0	0	0	1	0	0	0	0	0	0	0	0	0	0	0	0	0	0	0	0	1	0	1	0	0	1	0	0	0	0	0	0	0	0	0	0	0	0	0	1	0	0
phenylethylamine degradation II		0	0	0	0	0	0	0	0	0	0	0	0	0	0	0	0	0	0	0	0	0	0	0	0	0	0	0	0	0	0	1	0	0	1	0	0	0	0	0	0	0	0	0	0	1	0	0	0
cob(II)yrinate a,c-diamide biosynthesis I (early cobalt insertion)		0	0	0	0	0	0	0	0	0	0	0	1	0	0	1	0	0	0	0	0	0	0	0	1	0	1	0	0	0	0	0	1	0	0	0	0	0	0	0	0	0	0	1	0	0	0	0	0
D-sorbitol degradation I		0	0	0	0	0	0	0	0	0	0	0	0	0	1	1	0	0	0	0	0	0	0	0	0	0	0	0	1	0	0	0	0	0	0	0	0	0	1	0	0	0	0	1	0	0	0	0	0
glycine betaine biosynthesis II (Gram-positive bacteria)		1	1	1	1	1	1	1	1	1	1	1	1	1	1	0	1	1	1	1	1	1	1	1	1	1	1	1	1	1	1	1	1	1	1	1	1	1	1	1	1	1	1	0	1	1	1	1	1
L-threonine biosynthesis		1	1	1	0	0	1	0	0	1	1	0	1	1	1	1	0	1	1	0	0	0	0	0	1	1	1	0	1	1	1	1	1	0	1	1	1	1	1	1	0	1	0	1	1	1	1	0	0
L-methionine biosynthesis II		1	1	1	0	0	1	0	0	1	1	0	1	1	1	1	0	1	1	0	0	0	0	0	1	1	1	0	1	1	1	1	1	0	1	1	1	1	1	1	0	1	0	1	1	1	1	0	0
salicylate degradation IV		0	0	0	0	0	0	0	0	0	0	0	0	0	0	0	0	0	0	0	0	0	0	0	0	0	0	0	0	0	0	0	0	0	0	0	0	0	0	0	0	0	0	0	0	0	0	0	0
L-rhamnose degradation I		0	0	0	0	0	0	0	0	0	0	0	1	0	0	0	0	0	0	0	0	0	0	0	1	0	1	0	1	0	1	0	0	0	0	0	1	0	0	0	0	0	0	0	0	0	0	0	0
beta-alanine degradation II		1	0	0	1	0	0	0	0	1	0	1	0	1	1	0	1	1	1	1	1	1	1	1	0	0	0	0	0	0	0	1	1	1	1	1	1	1	1	1	1	1	1	0	1	1	0	1	1
beta-alanine biosynthesis II		1	0	0	1	0	0	0	0	1	0	1	0	1	1	0	1	1	1	1	1	1	1	1	0	0	0	0	0	0	0	1	1	1	1	1	1	1	1	1	1	1	1	0	1	1	0	1	1
cyanophycin metabolism		1	1	0	0	1	0	0	0	0	1	0	0	0	0	0	0	0	1	0	0	0	0	0	0	0	0	0	0	1	0	0	0	0	0	0	0	0	0	0	0	0	0	0	0	0	0	0	0
tetrahydropteridine recycling		1	0	0	0	1	1	1	1	1	0	0	1	0	1	1	0	1	1	0	1	1	1	0	1	1	1	0	1	1	1	1	1	1	1	1	1	1	1	1	1	1	0	1	1	1	0	1	0
L-tyrosine degradation V (reductive Stickland reaction)		0	0	0	0	0	1	0	0	0	0	0	0	0	0	0	0	0	0	0	0	0	0	0	0	1	0	0	0	0	0	0	0	0	0	0	0	0	0	0	0	0	0	0	0	0	0	0	0
L-Fucose degradation (non-phosphorylating)		0	0	0	0	0	0	0	0	1	0	0	0	0	0	0	0	0	0	0	0	1	1	0	0	0	0	0	0	0	0	1	0	1	1	1	1	1	0	0	0	1	0	0	0	0	0	1	0
NAD salvage (plants)		0	0	0	0	0	1	0	0	1	0	0	1	0	1	1	0	0	0	0	0	0	0	0	1	1	1	0	1	0	1	0	0	0	0	1	1	1	1	0	1	0	1	1	0	0	0	0	0
CDP-4-dehydro-3,6-dideoxy-D-glucose biosynthesis		0	0	0	0	0	0	0	0	0	0	0	0	0	0	0	0	1	0	0	0	0	0	0	0	0	0	0	0	0	0	1	0	0	1	0	0	0	0	1	0	0	0	0	1	1	0	0	0
tetracycline resistance		0	0	0	0	1	0	0	0	0	1	0	0	0	0	0	0	0	0	0	0	0	0	0	0	0	0	0	0	1	0	0	0	0	0	0	0	0	0	0	0	0	0	0	0	1	0	0	0
cinnamoyl-CoA biosynthesis		0	0	0	0	0	0	0	0	0	0	0	1	0	0	0	0	1	0	0	0	1	1	0	1	0	1	0	1	0	0	1	0	1	1	0	0	0	0	1	1	1	0	0	1	1	0	1	0
L-histidine degradation VI		1	1	1	0	1	0	0	0	1	1	1	1	1	1	0	1	1	1	0	1	1	1	1	1	0	1	0	1	1	0	1	0	1	1	1	1	1	1	1	1	1	0	0	1	1	1	1	1
L-histidine degradation II		1	1	1	0	1	0	0	0	1	1	1	1	1	1	0	1	1	1	0	1	1	1	1	1	0	1	0	1	1	0	1	0	1	1	1	1	1	1	1	1	1	0	0	1	1	1	1	1
arginine dependent acid resistance		1	0	0	0	0	1	0	0	1	0	0	1	1	1	1	0	1	1	0	0	0	0	0	1	1	1	1	1	0	1	1	1	0	1	1	1	1	1	1	0	1	0	1	1	1	0	0	0
L-glutamate biosynthesis IV		1	0	0	1	0	1	1	1	1	0	1	1	1	1	1	1	1	1	1	1	1	1	1	1	1	1	1	1	0	1	1	1	1	1	1	1	1	1	1	1	1	1	1	1	1	0	1	1
molybdopterin biosynthesis		0	0	0	0	0	1	0	0	1	0	0	1	0	1	1	0	0	0	0	0	0	0	0	1	1	1	0	1	0	1	0	0	0	0	1	1	1	1	1	0	0	0	1	1	0	0	0	0
N-end rule pathway II (prokaryotic)		1	0	0	1	0	0	1	1	0	0	1	0	1	0	0	1	1	1	1	1	1	1	1	0	0	0	0	0	0	0	1	0	1	1	0	0	0	0	1	1	1	1	0	1	1	0	1	1
L-citrulline degradation		0	0	0	0	0	1	0	0	0	0	0	1	0	0	1	0	1	0	0	0	0	0	0	1	1	1	0	1	0	1	1	0	0	1	0	1	0	0	1	0	1	0	1	1	1	0	0	0
L-histidine biosynthesis		1	1	1	1	1	1	1	1	1	1	0	1	1	1	1	0	1	1	1	1	0	0	0	1	1	1	0	1	1	1	1	1	0	1	1	1	1	1	1	0	1	1	1	1	1	1	0	0
L-arginine degradation III (arginine decarboxylase/agmatinase pathway)		0	0	0	0	0	1	0	0	1	0	0	1	0	1	1	0	1	0	0	0	0	0	0	1	1	1	1	1	0	1	1	1	0	1	1	1	1	1	1	0	1	0	1	1	1	0	0	0
putrescine biosynthesis I		0	0	0	0	0	1	0	0	1	0	0	1	0	1	1	0	1	0	0	0	0	0	0	1	1	1	1	1	0	1	1	1	0	1	1	1	1	1	1	0	1	0	1	1	1	0	0	0
dTDP-beta-L-rhamnose biosynthesis		1	0	0	1	0	0	0	0	1	0	0	0	0	0	0	0	1	1	1	0	0	0	1	0	1	1	1	0	0	0	1	0	0	1	1	1	1	0	1	0	1	1	0	1	1	0	0	1
trans-3-hydroxy-L-proline degradation		0	0	0	0	0	0	0	0	0	0	0	0	0	0	0	0	0	0	0	0	0	0	0	0	0	0	0	0	0	0	0	0	0	0	0	0	0	0	0	0	1	0	0	0	0	0	0	0
acetate and ATP formation from acetyl-CoA I		1	0	0	1	0	1	1	1	1	0	1	1	0	1	1	1	1	1	1	1	1	1	1	1	1	1	1	1	0	1	1	0	1	1	1	1	1	1	1	1	1	1	1	1	1	0	1	1
L-isoleucine biosynthesis II		0	0	0	0	0	1	0	0	1	0	0	1	0	1	0	0	0	0	0	0	0	0	0	1	1	1	0	1	0	1	0	0	0	0	1	1	1	1	0	0	0	0	0	0	0	0	0	0
NAD salvage pathway II (PNC IV cycle)		0	0	0	0	0	0	0	0	1	0	0	1	0	1	0	0	1	0	0	0	0	0	0	1	0	1	0	0	0	1	1	0	0	1	1	1	1	1	1	0	1	0	0	1	1	0	0	0
thiosulfate disproportionation IV (rhodanese)		0	0	0	0	0	1	0	0	1	0	0	1	0	1	1	0	1	0	0	0	0	0	0	1	1	1	0	1	0	1	1	0	0	1	1	1	1	1	1	0	1	0	1	1	1	0	0	0
glycerophosphodiester degradation		0	0	0	0	0	1	0	0	1	0	0	1	0	1	1	0	0	0	0	0	0	0	0	1	1	1	1	1	0	1	0	0	0	0	1	1	1	1	0	0	0	0	1	0	0	0	0	0
palmitoyl ethanolamide biosynthesis		0	0	0	0	0	0	0	0	1	0	0	1	0	1	0	0	0	0	0	0	0	0	0	1	0	1	0	0	0	1	0	0	0	0	1	1	1	1	0	0	0	0	0	0	0	0	0	0
diacylglycerol and triacylglycerol biosynthesis		0	0	0	0	0	0	0	0	1	0	0	1	0	1	0	0	0	0	0	0	0	0	0	1	0	1	0	0	0	1	0	0	0	0	1	1	1	1	0	0	0	0	0	0	0	0	0	0
heme b biosynthesis II (oxygen-independent)		1	1	1	1	1	1	1	1	1	1	0	1	1	1	1	0	1	1	1	0	1	1	0	1	1	1	0	1	1	1	1	0	1	1	1	1	1	1	1	1	1	1	1	1	1	1	1	0
nitrate reduction X (dissimilatory, periplasmic)		1	0	0	0	0	0	0	0	0	0	0	0	0	0	0	0	0	1	0	0	0	0	0	0	0	0	0	0	0	0	0	0	0	0	0	0	0	0	0	0	0	0	0	0	0	0	0	0
glyphosate degradation II		0	0	0	1	0	0	1	1	0	0	1	0	0	0	0	1	1	0	1	1	1	1	1	0	0	0	0	0	0	0	1	1	1	1	0	0	0	0	1	1	1	1	0	1	1	0	1	1
pyruvate fermentation to ethanol II	Group 30	0	0	0	1	0	1	0	0	1	0	1	1	0	1	1	1	0	0	1	1	0	0	1	1	1	0	0	1	0	1	0	0	0	0	1	1	1	1	0	0	1	1	1	0	0	0	0	1
pyruvate fermentation to acetate VIII	Group 30	0	0	0	1	0	1	0	0	1	0	1	1	0	1	1	1	0	0	1	1	0	0	1	1	1	0	0	1	0	1	0	0	0	0	1	1	1	1	0	0	1	1	1	0	0	0	0	1
acetaldehyde biosynthesis II	Group 30	0	0	0	1	0	1	0	0	1	0	1	1	0	1	1	1	0	0	1	1	0	0	1	1	1	0	0	1	0	1	0	0	0	0	1	1	1	1	0	0	1	1	1	0	0	0	0	1
butanol and isobutanol biosynthesis (engineered)	Group 30	0	0	0	1	0	1	0	0	1	0	1	1	0	1	1	1	0	0	1	1	0	0	1	1	1	0	0	1	0	1	0	0	0	0	1	1	1	1	0	0	1	1	1	0	0	0	0	1
L-valine degradation II	Group 29	0	0	0	1	0	1	0	0	1	0	1	1	0	1	1	1	0	0	1	1	0	0	1	1	1	1	0	1	0	1	0	0	0	0	1	1	1	1	0	0	1	1	1	0	0	0	0	1
L-leucine degradation III	Group 29	0	0	0	1	0	1	0	0	1	0	1	1	0	1	1	1	0	0	1	1	0	0	1	1	1	1	0	1	0	1	0	0	0	0	1	1	1	1	0	0	1	1	1	0	0	0	0	1
L-isoleucine degradation II	Group 29	0	0	0	1	0	1	0	0	1	0	1	1	0	1	1	1	0	0	1	1	0	0	1	1	1	1	0	1	0	1	0	0	0	0	1	1	1	1	0	0	1	1	1	0	0	0	0	1
indole-3-acetate biosynthesis VI (bacteria)	Group 29	0	0	0	1	0	1	0	0	1	0	1	1	0	1	1	1	0	0	1	1	0	0	1	1	1	1	0	1	0	1	0	0	0	0	1	1	1	1	0	0	1	1	1	0	0	0	0	1
D-sorbitol degradation II		0	0	0	0	0	0	0	0	0	0	0	0	0	1	0	0	0	0	0	0	0	0	0	1	0	1	0	0	0	0	0	0	0	0	0	1	0	1	0	0	0	0	0	0	0	0	0	0
L-alanine degradation III	Group 25	1	1	1	1	0	1	1	1	1	0	1	1	1	1	1	1	1	1	1	1	1	1	1	1	1	1	1	1	0	1	1	1	1	1	1	1	1	1	1	1	1	1	1	1	1	1	1	1
L-alanine biosynthesis II	Group 25	1	1	1	1	0	1	1	1	1	0	1	1	1	1	1	1	1	1	1	1	1	1	1	1	1	1	1	1	0	1	1	1	1	1	1	1	1	1	1	1	1	1	1	1	1	1	1	1
triclosan resistance	Group 25	1	1	1	1	0	1	1	1	1	0	1	1	1	1	1	1	1	1	1	1	1	1	1	1	1	1	1	1	0	1	1	1	1	1	1	1	1	1	1	1	1	1	1	1	1	1	1	1
pyrimidine nucleobases salvage I	Group 25	1	1	1	1	0	1	1	1	1	0	1	1	1	1	1	1	1	1	1	1	1	1	1	1	1	1	1	1	0	1	1	1	1	1	1	1	1	1	1	1	1	1	1	1	1	1	1	1
UDP-&alpha;-D-glucose biosynthesis		1	0	0	0	0	1	1	1	1	0	1	1	1	1	1	1	1	1	1	1	1	1	1	1	1	1	1	1	0	1	1	0	1	1	1	1	1	1	1	1	1	1	1	1	1	0	1	1
hentriaconta-3,6,9,12,15,19,22,25,28-nonaene biosynthesis	Group 34	0	0	0	0	0	0	0	0	0	0	0	0	1	0	0	0	0	0	0	0	0	0	0	0	0	0	0	0	0	0	0	0	0	0	0	0	0	0	0	0	0	0	0	0	0	0	0	0
Kdo transfer to lipid IVA II (Haemophilus)	Group 34	0	0	0	0	0	0	0	0	0	0	0	0	1	0	0	0	0	0	0	0	0	0	0	0	0	0	0	0	0	0	0	0	0	0	0	0	0	0	0	0	0	0	0	0	0	0	0	0
cis-alkene biosynthesis	Group 34	0	0	0	0	0	0	0	0	0	0	0	0	1	0	0	0	0	0	0	0	0	0	0	0	0	0	0	0	0	0	0	0	0	0	0	0	0	0	0	0	0	0	0	0	0	0	0	0
UDP-N-acetylmuramoyl-pentapeptide biosynthesis III (meso-diaminopimelate containing)	Group 34	0	0	0	0	0	0	0	0	0	0	0	0	1	0	0	0	0	0	0	0	0	0	0	0	0	0	0	0	0	0	0	0	0	0	0	0	0	0	0	0	0	0	0	0	0	0	0	0
serine racemization		1	1	1	0	0	1	0	0	1	0	1	1	1	0	0	1	0	1	0	0	0	0	1	0	1	1	0	1	0	0	1	0	0	1	1	1	1	0	0	0	0	0	0	0	0	1	0	1
UDP-N-acetyl-&alpha;-D-fucosamine biosynthesis		0	0	0	0	0	0	0	0	0	0	0	0	0	0	0	0	1	0	0	0	0	0	0	0	0	0	0	0	0	0	1	0	0	1	0	0	0	0	1	0	0	0	0	1	1	0	0	0
UDP-&alpha;-D-glucuronate biosynthesis (from UDP-glucose)		1	1	1	1	1	1	1	1	1	1	1	1	1	1	1	0	1	1	1	1	1	1	0	1	1	1	1	1	1	1	1	0	1	1	1	1	1	1	1	1	1	1	1	1	1	1	1	1
3-methylthiopropanoate biosynthesis		0	0	0	0	0	0	0	0	1	0	0	0	1	1	0	0	1	0	0	0	0	0	0	1	0	1	1	0	0	1	0	0	0	0	1	1	1	1	1	0	1	0	0	1	1	0	0	0
D-arabitol degradation		0	0	0	0	0	0	0	0	0	0	0	1	0	0	1	0	1	0	0	0	0	0	0	0	0	0	0	1	0	0	0	0	0	0	0	1	0	0	1	0	0	0	1	1	1	0	0	0
4-hydroxybenzoate biosynthesis II (bacteria)		0	0	0	1	0	1	1	1	1	0	1	0	0	1	0	1	1	0	1	1	1	1	1	1	1	1	0	0	0	1	1	0	1	1	1	1	1	1	1	1	1	1	0	1	1	0	1	1
fatty acid beta-oxidation VII (yeast peroxisome)		1	1	1	1	1	0	1	1	0	1	1	0	1	0	0	1	1	1	1	1	1	1	1	0	0	1	0	0	1	0	1	1	1	1	0	0	0	0	1	1	1	1	0	1	1	1	1	1
L-isoleucine biosynthesis I (from threonine)		1	1	1	1	1	1	1	1	1	1	1	1	0	1	1	1	1	1	1	1	1	1	1	1	1	1	0	1	1	1	1	1	1	1	1	1	1	1	1	1	1	1	1	1	1	1	1	1
methylglyoxal degradation VI		0	0	0	0	0	1	0	0	1	0	0	1	0	0	1	0	0	0	0	0	1	1	0	1	1	1	0	0	0	1	0	0	0	0	1	1	1	0	0	0	0	0	1	0	0	0	0	0
glycine betaine degradation I		0	0	0	0	0	0	0	0	0	0	0	0	0	0	0	0	1	0	0	0	0	0	0	0	0	0	0	0	0	0	1	0	0	1	0	0	0	0	1	0	1	0	0	1	1	0	0	0
histamine biosynthesis		0	0	0	1	0	0	0	0	0	0	0	0	0	0	1	0	0	0	1	1	0	0	0	0	0	1	0	0	0	0	0	0	0	0	0	0	0	0	0	0	0	1	1	0	0	0	0	0
xylitol degradation		0	0	0	0	0	0	0	0	1	0	0	0	0	1	1	0	0	0	0	0	1	1	0	0	0	0	1	1	0	0	0	0	1	0	0	0	0	1	0	1	0	0	1	0	1	0	1	0
C4 photosynthetic carbon assimilation cycle, NAD-ME type		1	0	0	1	0	1	1	1	1	0	1	1	1	1	1	1	0	1	1	1	1	1	1	1	1	1	0	1	0	1	1	0	1	1	1	1	1	1	0	1	0	1	1	0	0	0	1	1
phospholipid remodeling (phosphatidate, yeast)		0	0	0	0	0	1	0	0	1	0	0	1	0	0	0	0	0	0	0	0	0	0	0	1	1	1	0	1	0	1	0	0	0	0	1	1	1	0	0	0	0	0	0	0	0	0	0	0
ethanolamine utilization		0	0	0	0	0	0	0	0	1	0	1	1	0	1	1	1	1	0	0	1	1	1	1	0	0	1	0	0	0	1	1	0	1	1	1	1	1	1	1	1	1	0	1	1	1	0	1	1
quinate degradation I		0	0	0	1	0	0	0	0	1	0	1	0	0	1	0	1	1	0	1	1	1	1	1	0	0	0	0	0	0	0	1	0	1	1	1	0	1	1	1	1	1	1	0	1	1	0	1	1
shikimate degradation I		0	0	0	1	0	0	0	0	1	0	1	0	0	1	0	1	1	0	1	1	1	1	1	0	0	0	0	0	0	0	1	0	1	1	1	0	1	1	1	1	1	1	0	1	1	0	1	1
autoinducer AI-1 biosynthesis		0	0	0	0	0	0	0	0	1	0	1	1	0	1	0	0	0	0	0	0	0	0	1	0	0	1	0	0	0	0	0	0	0	0	0	1	0	1	0	0	0	0	0	0	0	0	0	1
pyruvate fermentation to (S)-acetoin		0	0	0	1	0	0	0	0	1	0	1	0	0	1	1	1	0	0	1	0	1	1	1	1	0	0	0	1	0	1	0	0	1	0	1	1	1	1	0	1	0	1	1	0	0	0	1	1
L-lysine biosynthesis III		1	0	0	0	0	1	1	1	0	0	0	0	0	0	1	0	0	1	0	0	0	0	0	0	1	0	0	1	0	0	0	1	0	0	0	0	0	0	0	0	0	0	1	0	0	0	0	0
glycolate and glyoxylate degradation I		1	0	0	0	0	0	1	1	0	0	0	0	0	0	0	1	1	1	0	0	0	0	0	1	0	1	0	0	0	0	1	0	0	1	1	0	1	0	1	0	1	0	0	1	1	0	0	0
cardiolipin biosynthesis III		0	0	0	0	0	1	0	0	1	0	0	1	0	1	1	0	1	0	0	0	0	0	0	1	1	1	1	1	0	1	1	1	0	1	1	1	1	1	1	0	1	0	1	1	1	0	0	0
cardiolipin biosynthesis I		0	0	0	0	0	1	0	0	1	0	0	1	0	1	1	0	1	0	0	0	0	0	0	1	1	1	1	1	0	1	1	1	0	1	1	1	1	1	1	0	1	0	1	1	1	0	0	0
D-gulosides conversion to D-glucosides		0	0	0	0	0	0	0	0	0	0	0	0	0	0	0	0	0	0	0	0	0	0	0	1	0	0	0	0	0	1	0	0	0	0	0	0	0	0	0	0	0	0	0	0	0	0	0	0
propanoate fermentation to 2-methylbutanoate		1	0	0	1	0	0	1	1	0	0	1	0	1	0	0	1	1	1	1	1	1	1	1	0	0	0	0	1	0	0	1	0	1	1	0	0	0	0	1	1	1	1	0	1	1	0	1	1
formaldehyde oxidation VII (THF pathway)		1	0	0	1	0	1	1	1	1	0	1	1	1	1	1	1	1	1	1	1	1	1	1	1	1	1	0	1	0	1	1	0	1	1	1	1	1	1	1	1	1	1	1	1	1	0	1	1
D-gluconate degradation		0	0	0	0	0	1	0	0	1	0	0	1	0	1	1	0	1	0	0	0	0	0	0	1	1	1	1	1	1	1	0	0	0	0	1	1	1	1	1	0	0	0	1	1	1	0	0	0
monolignol glucosides biosynthesis		0	0	0	0	0	0	0	0	0	0	0	1	0	0	0	0	0	0	0	0	0	0	0	1	0	1	1	0	0	0	0	1	0	0	0	0	0	0	0	0	0	0	0	0	0	0	0	0
acetyl-CoA fermentation to butanoate clostridia		0	1	1	0	1	0	1	1	0	1	0	0	0	0	0	0	0	0	0	0	0	0	0	0	0	0	0	0	1	0	0	0	0	0	0	0	0	0	0	0	0	0	0	0	0	1	0	0
fatty acid beta-oxidation I (generic)		1	1	1	1	1	1	1	1	1	1	1	1	1	1	1	1	1	1	1	1	1	1	1	1	1	1	1	1	1	1	1	1	1	1	1	1	1	1	1	1	1	1	1	1	1	1	1	1
guanosine ribonucleotides de novo biosynthesis		1	1	1	1	1	1	1	1	1	1	1	1	1	1	1	1	1	1	1	1	1	1	1	1	1	1	1	1	1	1	1	1	1	1	1	1	1	1	1	1	1	1	1	1	1	1	1	1
pyridoxal 5'-phosphate biosynthesis I		1	1	1	1	0	1	1	1	1	0	1	1	1	1	1	1	1	1	1	1	1	1	1	1	1	1	0	1	0	1	1	0	1	1	1	1	1	1	1	1	1	1	1	1	1	1	1	1
cadaverine biosynthesis		1	0	0	1	1	1	1	1	1	1	1	1	1	1	1	1	1	1	1	1	1	1	1	1	1	1	0	1	1	1	1	0	1	1	1	1	1	1	1	1	1	1	1	1	1	0	1	1
S-adenosyl-L-methionine salvage II		1	1	1	1	1	0	1	1	0	1	1	0	1	0	1	1	1	1	1	1	1	1	1	0	0	0	0	0	1	0	1	0	1	1	0	0	0	0	1	1	1	1	1	1	1	1	1	1
sulfoacetaldehyde degradation III		0	0	0	0	0	1	0	0	1	0	1	1	1	1	0	1	1	0	0	0	0	0	1	1	1	1	0	0	0	1	1	0	0	1	1	1	1	1	1	0	1	0	0	1	1	0	0	1
NAD biosynthesis III (from nicotinamide)		0	0	0	0	0	0	0	0	0	0	0	0	0	0	0	0	0	0	0	0	0	0	0	0	0	0	0	0	0	1	0	0	0	0	0	0	0	0	0	0	0	0	0	0	0	0	0	0
L-sorbose degradation		0	0	0	0	0	0	0	0	0	0	0	0	0	0	0	0	0	0	0	0	0	0	0	0	0	0	0	0	0	0	0	0	0	0	0	0	0	0	0	0	0	0	0	0	0	0	0	0
ornithine lipid biosynthesis		0	1	1	0	1	0	0	0	1	1	0	0	1	1	0	0	1	0	0	0	0	0	0	1	0	1	0	1	1	1	0	0	0	0	1	1	1	1	1	0	1	0	0	1	1	1	0	0
queuosine biosynthesis I (de novo)		1	0	0	1	0	1	1	1	1	0	1	1	1	1	1	1	1	1	1	1	1	1	1	1	1	1	1	1	0	1	1	0	1	1	1	1	1	1	1	1	1	1	1	1	1	0	1	1
L-tryptophan biosynthesis		1	0	0	1	0	1	1	1	1	0	1	1	1	1	1	1	1	1	1	1	1	1	1	1	1	1	1	1	0	1	1	0	1	1	1	1	1	1	1	1	1	1	1	1	1	0	1	1
volatile esters biosynthesis (during fruit ripening)		1	0	0	0	0	1	0	0	1	0	0	1	0	1	1	0	1	1	0	0	0	0	0	1	1	1	0	1	0	1	1	0	0	1	1	1	1	1	1	0	1	0	1	1	1	0	0	0
heme b biosynthesis V (aerobic)		1	1	1	1	1	1	1	1	1	1	1	1	1	1	1	1	1	1	1	1	1	1	1	1	1	1	1	1	1	1	1	1	1	1	1	1	1	1	1	1	1	1	1	1	1	1	1	1
protein N-glycosylation processing phase (plants and animals)		0	1	1	0	1	0	1	1	1	1	1	0	1	1	0	1	0	0	0	1	1	1	1	0	0	1	0	0	1	0	0	0	0	0	1	1	1	1	0	1	0	0	0	0	0	1	0	1
ethanol degradation III		0	0	0	0	0	1	0	0	0	0	0	0	0	0	0	0	0	0	0	0	0	0	0	0	1	0	0	1	0	0	0	0	0	0	0	0	0	0	0	0	0	0	0	0	0	0	0	0
salidroside biosynthesis		0	0	0	0	0	1	0	0	0	0	0	0	0	0	0	0	0	0	0	0	0	0	0	0	1	0	0	1	0	0	0	0	0	0	0	0	0	0	0	0	0	0	0	0	0	0	0	0
L-Tyrosine degradation to 4-hydroxyphenylacetate via tyramine		0	0	0	0	0	1	0	0	0	0	0	0	0	0	0	0	0	0	0	0	0	0	0	0	1	0	0	1	0	0	0	0	0	0	0	0	0	0	0	0	0	0	0	0	0	0	0	0
senecionine N-oxide biosynthesis		1	1	1	0	0	0	1	1	0	0	0	0	0	0	0	1	0	1	0	0	0	0	0	0	0	0	0	0	0	0	0	0	0	0	0	0	0	0	0	0	0	0	0	0	0	1	0	0
alkylnitronates degradation		1	0	0	0	0	0	1	1	0	0	1	1	0	1	0	1	1	1	0	1	1	1	1	1	0	0	0	0	0	0	1	0	1	1	0	0	0	1	1	1	0	0	0	1	0	0	1	1
citronellol degradation		1	0	0	1	0	0	0	0	0	0	1	0	1	0	0	1	1	1	1	1	1	1	1	0	0	0	0	0	0	0	0	0	1	0	0	0	0	0	1	1	0	1	0	1	1	0	1	1
glutarate degradation		0	0	0	0	0	0	0	0	0	0	0	1	0	0	0	0	0	0	0	0	0	0	0	0	0	0	0	0	0	0	1	0	0	1	0	0	0	0	0	0	0	0	0	0	0	0	0	0
glyphosate degradation III		0	0	0	0	0	0	0	0	1	0	0	1	0	1	0	0	0	0	0	0	0	0	0	1	0	1	0	0	0	0	0	0	0	0	1	1	1	1	0	0	0	0	0	0	0	0	0	0
cyclopropane fatty acid (CFA) biosynthesis		1	0	0	0	0	1	0	0	1	0	0	1	1	1	1	0	0	1	0	0	0	0	0	1	1	1	0	1	0	1	0	0	0	0	1	1	1	1	0	0	0	0	1	0	0	0	0	0
L-methionine biosynthesis I		1	0	0	1	0	1	1	1	1	0	1	1	1	1	1	1	1	1	1	1	1	1	1	1	1	1	0	1	0	1	1	1	1	1	1	1	1	1	1	1	1	1	1	1	1	0	1	1
ginsenoside degradation III		0	0	0	0	0	0	0	0	0	0	0	0	0	0	0	0	0	0	0	0	0	0	0	0	0	1	0	0	1	0	0	0	0	0	0	0	0	0	0	0	0	0	0	0	0	0	0	0
Entner-Doudoroff shunt		1	0	0	0	0	1	0	0	1	0	0	1	0	1	1	0	1	1	0	0	0	0	0	1	1	1	0	1	0	1	1	0	0	1	1	1	1	1	1	0	1	0	1	1	1	0	0	0
L-arginine degradation IX (arginine:pyruvate transaminase pathway)	Group 13	0	0	0	0	0	0	0	0	0	0	0	0	0	0	0	0	1	0	0	0	0	0	0	0	0	0	0	0	0	0	1	0	0	1	0	0	0	0	1	0	1	0	0	1	1	0	0	0
pyoverdine I biosynthesis	Group 13	0	0	0	0	0	0	0	0	0	0	0	0	0	0	0	0	1	0	0	0	0	0	0	0	0	0	0	0	0	0	1	0	0	1	0	0	0	0	1	0	1	0	0	1	1	0	0	0
4-aminobutanoate degradation IV	Group 13	0	0	0	0	0	0	0	0	0	0	0	0	0	0	0	0	1	0	0	0	0	0	0	0	0	0	0	0	0	0	1	0	0	1	0	0	0	0	1	0	1	0	0	1	1	0	0	0
polyhydroxydecanoate biosynthesis	Group 13	0	0	0	0	0	0	0	0	0	0	0	0	0	0	0	0	1	0	0	0	0	0	0	0	0	0	0	0	0	0	1	0	0	1	0	0	0	0	1	0	1	0	0	1	1	0	0	0
N-acetylglutaminylglutamine amide biosynthesis	Group 13	0	0	0	0	0	0	0	0	0	0	0	0	0	0	0	0	1	0	0	0	0	0	0	0	0	0	0	0	0	0	1	0	0	1	0	0	0	0	1	0	1	0	0	1	1	0	0	0
phosphatidate biosynthesis (yeast)	Group 13	0	0	0	0	0	0	0	0	0	0	0	0	0	0	0	0	1	0	0	0	0	0	0	0	0	0	0	0	0	0	1	0	0	1	0	0	0	0	1	0	1	0	0	1	1	0	0	0
anhydromuropeptides recycling II	Group 13	0	0	0	0	0	0	0	0	0	0	0	0	0	0	0	0	1	0	0	0	0	0	0	0	0	0	0	0	0	0	1	0	0	1	0	0	0	0	1	0	1	0	0	1	1	0	0	0
L-ascorbate biosynthesis VIII (engineered pathway)		0	0	0	0	0	0	0	0	1	0	0	0	1	1	0	0	0	0	0	0	0	0	0	0	0	1	0	0	0	1	0	0	0	0	1	1	1	1	0	0	0	0	0	0	0	0	0	0
malonate degradation I (biotin-independent)		0	0	0	0	0	0	0	0	0	0	1	1	0	0	0	1	1	0	0	1	0	0	0	1	0	1	0	0	0	0	1	0	0	1	0	0	0	0	1	0	1	0	0	1	1	0	0	1
trehalose degradation II (cytosolic)		0	0	0	0	1	0	0	0	0	1	0	0	1	0	0	0	1	0	0	0	0	0	0	1	0	0	0	0	1	1	1	0	0	1	0	0	0	0	1	0	1	0	0	1	1	0	0	0
L-ascorbate degradation II (bacterial, aerobic)		0	0	0	0	0	0	0	0	1	0	0	1	0	1	0	0	0	0	0	0	0	0	0	1	0	0	0	1	0	0	0	0	0	0	1	1	1	1	0	0	0	0	0	0	0	0	0	0
heterolactic fermentation		0	0	0	0	0	0	0	0	1	0	0	0	0	1	1	0	0	0	0	0	0	0	0	1	0	1	0	1	0	1	0	0	0	0	1	1	1	1	0	0	0	0	1	0	0	0	0	0
polyhydroxybutanoate biosynthesis		0	0	0	0	0	0	0	0	1	0	0	1	0	1	0	0	1	0	0	0	0	0	0	1	0	1	0	0	0	1	1	0	0	1	1	1	1	1	1	0	1	0	0	1	0	0	0	0
4-hydroxy-2(1H)-quinolone biosynthesis		0	1	1	0	0	0	0	0	0	0	0	0	0	0	0	0	0	0	0	0	0	0	0	0	0	0	0	0	0	0	0	0	0	0	0	0	0	0	0	0	0	0	0	0	0	1	0	0
seleno-amino acid detoxification and volatilization I		0	0	0	0	0	0	0	0	1	0	0	1	1	1	0	0	0	0	0	0	0	0	0	1	0	1	0	0	0	1	0	0	0	0	1	1	1	1	0	0	0	0	0	0	0	0	0	0
pyrimidine deoxyribonucleotides dephosphorylation		0	0	0	0	0	0	0	0	0	0	0	0	0	0	0	0	0	0	0	0	0	0	0	0	0	0	0	0	0	0	0	0	0	0	0	0	0	0	0	0	0	0	0	0	0	0	0	0
trehalose degradation V		0	1	1	0	0	0	0	0	0	0	0	0	0	0	1	0	0	0	0	0	0	0	0	1	0	1	1	0	0	1	0	0	0	0	0	0	0	0	0	0	0	0	1	0	0	1	0	0
D-xylose degradation to ethylene glycol (engineered)		0	0	0	0	0	0	0	0	0	0	0	0	0	0	0	0	0	0	0	0	0	0	0	0	0	0	0	0	0	0	0	0	0	0	0	0	0	0	0	0	0	0	0	0	0	0	0	0
D-xylose degradation IV		0	0	0	0	0	0	0	0	0	0	0	0	0	0	0	0	0	0	0	0	0	0	0	0	0	0	0	0	0	0	0	0	0	0	0	0	0	0	0	0	0	0	0	0	0	0	0	0
cellulose biosynthesis		0	0	0	0	0	1	0	0	1	0	0	1	0	1	0	0	0	0	0	0	0	0	0	1	1	1	0	0	0	1	0	0	0	0	1	1	1	1	0	0	1	0	0	0	0	0	0	0
thiosulfate oxidation I (to tetrathionate)		1	0	0	0	0	0	0	0	0	0	0	0	0	0	0	0	0	1	0	0	0	0	0	0	0	0	0	0	0	0	1	0	0	1	0	0	0	0	0	0	1	0	0	0	1	0	0	0
mannitol degradation II		0	0	0	0	0	0	0	0	1	0	0	1	0	0	0	0	0	0	0	0	0	0	0	1	0	1	0	1	0	1	0	0	0	0	1	1	1	0	0	0	0	0	1	0	0	0	0	0
2-keto-L-gulonate biosynthesis		1	0	0	0	0	0	0	0	1	0	0	0	1	1	0	1	1	1	0	0	1	1	1	0	0	1	0	1	0	1	1	0	1	1	1	1	1	1	1	1	1	1	0	1	1	0	1	0
guaiacol biosynthesis	Group 35	0	0	0	0	0	0	0	0	0	0	0	0	0	0	0	0	0	0	0	0	0	0	0	0	0	0	0	0	0	0	0	0	0	0	0	0	0	0	0	0	0	0	0	0	0	0	0	0
betaxanthin biosynthesis	Group 35	0	0	0	0	0	0	0	0	0	0	0	0	0	0	0	0	0	0	0	0	0	0	0	0	0	0	0	0	0	0	0	0	0	0	0	0	0	0	0	0	0	0	0	0	0	0	0	0
noradrenaline and adrenaline degradation	Group 35	0	0	0	0	0	0	0	0	0	0	0	0	0	0	0	0	0	0	0	0	0	0	0	0	0	0	0	0	0	0	0	0	0	0	0	0	0	0	0	0	0	0	0	0	0	0	0	0
dopamine degradation	Group 35	0	0	0	0	0	0	0	0	0	0	0	0	0	0	0	0	0	0	0	0	0	0	0	0	0	0	0	0	0	0	0	0	0	0	0	0	0	0	0	0	0	0	0	0	0	0	0	0
aminopropanol phosphate biosynthesis I		0	0	0	0	0	0	0	0	0	0	0	1	0	0	1	0	0	0	0	0	0	0	0	1	0	1	0	0	0	0	0	0	0	0	0	0	0	0	0	0	0	0	1	0	0	0	0	0
myo-inositol degradation I		0	0	0	0	0	0	0	0	1	0	0	0	0	1	0	0	0	0	0	0	0	0	0	1	0	1	0	1	0	1	0	0	0	0	1	1	1	1	0	0	0	0	0	0	1	0	0	0
xyloglucan degradation II (exoglucanase)	Group 15	0	0	0	0	0	0	0	0	0	0	0	0	0	0	0	0	0	0	0	0	0	0	0	0	0	0	0	0	0	0	0	0	0	0	0	0	0	0	0	0	0	0	0	0	0	0	0	0
isoprene biosynthesis II (engineered)	Group 15	0	0	0	0	0	0	0	0	0	0	0	0	0	0	0	0	0	0	0	0	0	0	0	0	0	0	0	0	0	0	0	0	0	0	0	0	0	0	0	0	0	0	0	0	0	0	0	0
hyaluronan degradation	Group 15	0	0	0	0	0	0	0	0	0	0	0	0	0	0	0	0	0	0	0	0	0	0	0	0	0	0	0	0	0	0	0	0	0	0	0	0	0	0	0	0	0	0	0	0	0	0	0	0
&alpha;-diglucosyldiacylglycerol biosynthesis	Group 15	0	0	0	0	0	0	0	0	0	0	0	0	0	0	0	0	0	0	0	0	0	0	0	0	0	0	0	0	0	0	0	0	0	0	0	0	0	0	0	0	0	0	0	0	0	0	0	0
mevalonate pathway IV (archaea)	Group 15	0	0	0	0	0	0	0	0	0	0	0	0	0	0	0	0	0	0	0	0	0	0	0	0	0	0	0	0	0	0	0	0	0	0	0	0	0	0	0	0	0	0	0	0	0	0	0	0
mevalonate pathway I (eukaryotes and bacteria)	Group 15	0	0	0	0	0	0	0	0	0	0	0	0	0	0	0	0	0	0	0	0	0	0	0	0	0	0	0	0	0	0	0	0	0	0	0	0	0	0	0	0	0	0	0	0	0	0	0	0
Lacto-N-tetraose degradation	Group 15	0	0	0	0	0	0	0	0	0	0	0	0	0	0	0	0	0	0	0	0	0	0	0	0	0	0	0	0	0	0	0	0	0	0	0	0	0	0	0	0	0	0	0	0	0	0	0	0
dimethyl sulfide degradation II (oxidation)		0	0	0	1	0	0	0	0	0	0	0	0	0	0	0	0	0	0	1	0	1	1	1	0	0	0	0	0	0	0	0	0	1	0	0	0	0	0	0	1	0	1	0	0	0	0	1	0
adenine and adenosine salvage I		0	0	0	0	0	1	0	0	1	0	0	1	0	1	1	0	1	0	0	0	0	0	0	1	1	1	1	1	0	1	1	1	0	1	1	1	1	1	1	0	1	0	1	1	1	0	0	0
linezolid resistance		0	0	0	0	0	0	0	0	0	0	0	0	0	0	0	0	0	0	0	0	0	0	0	0	0	0	1	0	0	0	0	0	0	0	0	0	0	0	0	0	0	0	0	0	0	0	0	0
sulfur reduction III		0	0	0	0	0	0	0	0	0	0	0	0	0	0	0	0	0	0	0	0	0	0	0	0	0	0	1	0	0	0	0	0	0	0	0	0	0	0	0	0	0	0	0	0	0	0	0	0
L-tryptophan degradation II (via pyruvate)		0	1	1	0	1	1	0	0	0	1	0	0	0	0	1	0	0	0	0	0	0	0	0	0	1	0	0	1	1	1	0	0	0	0	0	0	0	0	0	0	0	0	1	0	0	1	0	0
inosine 5'-phosphate degradation		0	0	0	0	0	0	0	0	1	0	0	1	0	0	1	0	1	0	0	0	0	0	0	1	0	1	0	0	0	1	1	0	0	1	1	1	1	0	1	0	1	0	1	1	1	0	0	0
UDP-N-acetyl-D-galactosamine biosynthesis I		1	1	1	1	1	1	1	1	1	1	1	1	1	1	1	1	1	1	1	1	1	1	1	1	1	1	1	1	1	1	1	0	1	1	1	1	1	1	1	1	0	1	1	1	1	1	1	1
1,2-dichloroethane degradation	Group 1	0	0	0	0	0	0	0	0	0	0	0	0	0	0	0	0	0	0	0	0	0	0	0	0	0	0	0	0	0	0	0	0	0	0	0	0	0	0	0	0	0	0	0	0	0	0	0	0
1,4-dichlorobenzene degradation	Group 1	0	0	0	0	0	0	0	0	0	0	0	0	0	0	0	0	0	0	0	0	0	0	0	0	0	0	0	0	0	0	0	0	0	0	0	0	0	0	0	0	0	0	0	0	0	0	0	0
anthranilate degradation III (anaerobic)	Group 1	0	0	0	0	0	0	0	0	0	0	0	0	0	0	0	0	0	0	0	0	0	0	0	0	0	0	0	0	0	0	0	0	0	0	0	0	0	0	0	0	0	0	0	0	0	0	0	0
orthanilate degradation	Group 1	0	0	0	0	0	0	0	0	0	0	0	0	0	0	0	0	0	0	0	0	0	0	0	0	0	0	0	0	0	0	0	0	0	0	0	0	0	0	0	0	0	0	0	0	0	0	0	0
2-oxobutanoate degradation II	Group 1	0	0	0	0	0	0	0	0	0	0	0	0	0	0	0	0	0	0	0	0	0	0	0	0	0	0	0	0	0	0	0	0	0	0	0	0	0	0	0	0	0	0	0	0	0	0	0	0
1,8-cineole degradation	Group 1	0	0	0	0	0	0	0	0	0	0	0	0	0	0	0	0	0	0	0	0	0	0	0	0	0	0	0	0	0	0	0	0	0	0	0	0	0	0	0	0	0	0	0	0	0	0	0	0
ammonia oxidation I (aerobic)	Group 1	0	0	0	0	0	0	0	0	0	0	0	0	0	0	0	0	0	0	0	0	0	0	0	0	0	0	0	0	0	0	0	0	0	0	0	0	0	0	0	0	0	0	0	0	0	0	0	0
L-arginine degradation VIII (arginine oxidase pathway)	Group 1	0	0	0	0	0	0	0	0	0	0	0	0	0	0	0	0	0	0	0	0	0	0	0	0	0	0	0	0	0	0	0	0	0	0	0	0	0	0	0	0	0	0	0	0	0	0	0	0
Calvin-Benson-Bassham cycle	Group 1	0	0	0	0	0	0	0	0	0	0	0	0	0	0	0	0	0	0	0	0	0	0	0	0	0	0	0	0	0	0	0	0	0	0	0	0	0	0	0	0	0	0	0	0	0	0	0	0
camalexin biosynthesis	Group 1	0	0	0	0	0	0	0	0	0	0	0	0	0	0	0	0	0	0	0	0	0	0	0	0	0	0	0	0	0	0	0	0	0	0	0	0	0	0	0	0	0	0	0	0	0	0	0	0
benzoyl-CoA degradation II (anaerobic)	Group 1	0	0	0	0	0	0	0	0	0	0	0	0	0	0	0	0	0	0	0	0	0	0	0	0	0	0	0	0	0	0	0	0	0	0	0	0	0	0	0	0	0	0	0	0	0	0	0	0
pyruvate fermentation to butanoate	Group 1	0	0	0	0	0	0	0	0	0	0	0	0	0	0	0	0	0	0	0	0	0	0	0	0	0	0	0	0	0	0	0	0	0	0	0	0	0	0	0	0	0	0	0	0	0	0	0	0
3,8-divinyl-chlorophyllide a biosynthesis I (aerobic, light-dependent)	Group 1	0	0	0	0	0	0	0	0	0	0	0	0	0	0	0	0	0	0	0	0	0	0	0	0	0	0	0	0	0	0	0	0	0	0	0	0	0	0	0	0	0	0	0	0	0	0	0	0
methanogenesis from methanol	Group 1	0	0	0	0	0	0	0	0	0	0	0	0	0	0	0	0	0	0	0	0	0	0	0	0	0	0	0	0	0	0	0	0	0	0	0	0	0	0	0	0	0	0	0	0	0	0	0	0
reductive acetyl coenzyme A pathway I (homoacetogenic bacteria)	Group 1	0	0	0	0	0	0	0	0	0	0	0	0	0	0	0	0	0	0	0	0	0	0	0	0	0	0	0	0	0	0	0	0	0	0	0	0	0	0	0	0	0	0	0	0	0	0	0	0
creatinine degradation I	Group 1	0	0	0	0	0	0	0	0	0	0	0	0	0	0	0	0	0	0	0	0	0	0	0	0	0	0	0	0	0	0	0	0	0	0	0	0	0	0	0	0	0	0	0	0	0	0	0	0
cyanate degradation	Group 1	0	0	0	0	0	0	0	0	0	0	0	0	0	0	0	0	0	0	0	0	0	0	0	0	0	0	0	0	0	0	0	0	0	0	0	0	0	0	0	0	0	0	0	0	0	0	0	0
cyclohexanol degradation	Group 1	0	0	0	0	0	0	0	0	0	0	0	0	0	0	0	0	0	0	0	0	0	0	0	0	0	0	0	0	0	0	0	0	0	0	0	0	0	0	0	0	0	0	0	0	0	0	0	0
L-cysteine degradation I	Group 1	0	0	0	0	0	0	0	0	0	0	0	0	0	0	0	0	0	0	0	0	0	0	0	0	0	0	0	0	0	0	0	0	0	0	0	0	0	0	0	0	0	0	0	0	0	0	0	0
D-arabinose degradation II	Group 1	0	0	0	0	0	0	0	0	0	0	0	0	0	0	0	0	0	0	0	0	0	0	0	0	0	0	0	0	0	0	0	0	0	0	0	0	0	0	0	0	0	0	0	0	0	0	0	0
nitrate reduction I (denitrification)	Group 1	0	0	0	0	0	0	0	0	0	0	0	0	0	0	0	0	0	0	0	0	0	0	0	0	0	0	0	0	0	0	0	0	0	0	0	0	0	0	0	0	0	0	0	0	0	0	0	0
benzenesulfonate degradation	Group 1	0	0	0	0	0	0	0	0	0	0	0	0	0	0	0	0	0	0	0	0	0	0	0	0	0	0	0	0	0	0	0	0	0	0	0	0	0	0	0	0	0	0	0	0	0	0	0	0
dissimilatory sulfate reduction I (to hydrogen sufide))	Group 1	0	0	0	0	0	0	0	0	0	0	0	0	0	0	0	0	0	0	0	0	0	0	0	0	0	0	0	0	0	0	0	0	0	0	0	0	0	0	0	0	0	0	0	0	0	0	0	0
sulfur oxidation II (Fe+3-dependent)	Group 1	0	0	0	0	0	0	0	0	0	0	0	0	0	0	0	0	0	0	0	0	0	0	0	0	0	0	0	0	0	0	0	0	0	0	0	0	0	0	0	0	0	0	0	0	0	0	0	0
fluorene degradation I	Group 1	0	0	0	0	0	0	0	0	0	0	0	0	0	0	0	0	0	0	0	0	0	0	0	0	0	0	0	0	0	0	0	0	0	0	0	0	0	0	0	0	0	0	0	0	0	0	0	0
D-galactose degradation II	Group 1	0	0	0	0	0	0	0	0	0	0	0	0	0	0	0	0	0	0	0	0	0	0	0	0	0	0	0	0	0	0	0	0	0	0	0	0	0	0	0	0	0	0	0	0	0	0	0	0
gamma-hexachlorocyclohexane degradation	Group 1	0	0	0	0	0	0	0	0	0	0	0	0	0	0	0	0	0	0	0	0	0	0	0	0	0	0	0	0	0	0	0	0	0	0	0	0	0	0	0	0	0	0	0	0	0	0	0	0
glutathione-glutaredoxin redox reactions	Group 1	0	0	0	0	0	0	0	0	0	0	0	0	0	0	0	0	0	0	0	0	0	0	0	0	0	0	0	0	0	0	0	0	0	0	0	0	0	0	0	0	0	0	0	0	0	0	0	0
creatine biosynthesis	Group 1	0	0	0	0	0	0	0	0	0	0	0	0	0	0	0	0	0	0	0	0	0	0	0	0	0	0	0	0	0	0	0	0	0	0	0	0	0	0	0	0	0	0	0	0	0	0	0	0
hexaprenyl diphosphate biosynthesis	Group 1	0	0	0	0	0	0	0	0	0	0	0	0	0	0	0	0	0	0	0	0	0	0	0	0	0	0	0	0	0	0	0	0	0	0	0	0	0	0	0	0	0	0	0	0	0	0	0	0
L-histidine degradation IV	Group 1	0	0	0	0	0	0	0	0	0	0	0	0	0	0	0	0	0	0	0	0	0	0	0	0	0	0	0	0	0	0	0	0	0	0	0	0	0	0	0	0	0	0	0	0	0	0	0	0
lactose and galactose degradation I	Group 1	0	0	0	0	0	0	0	0	0	0	0	0	0	0	0	0	0	0	0	0	0	0	0	0	0	0	0	0	0	0	0	0	0	0	0	0	0	0	0	0	0	0	0	0	0	0	0	0
L-lysine degradation III	Group 1	0	0	0	0	0	0	0	0	0	0	0	0	0	0	0	0	0	0	0	0	0	0	0	0	0	0	0	0	0	0	0	0	0	0	0	0	0	0	0	0	0	0	0	0	0	0	0	0
protein N-glycosylation initial phase (eukaryotic)	Group 1	0	0	0	0	0	0	0	0	0	0	0	0	0	0	0	0	0	0	0	0	0	0	0	0	0	0	0	0	0	0	0	0	0	0	0	0	0	0	0	0	0	0	0	0	0	0	0	0
methanogenesis from acetate	Group 1	0	0	0	0	0	0	0	0	0	0	0	0	0	0	0	0	0	0	0	0	0	0	0	0	0	0	0	0	0	0	0	0	0	0	0	0	0	0	0	0	0	0	0	0	0	0	0	0
methanogenesis from H2 and CO2	Group 1	0	0	0	0	0	0	0	0	0	0	0	0	0	0	0	0	0	0	0	0	0	0	0	0	0	0	0	0	0	0	0	0	0	0	0	0	0	0	0	0	0	0	0	0	0	0	0	0
methyl-coenzyme M reduction to methane	Group 1	0	0	0	0	0	0	0	0	0	0	0	0	0	0	0	0	0	0	0	0	0	0	0	0	0	0	0	0	0	0	0	0	0	0	0	0	0	0	0	0	0	0	0	0	0	0	0	0
L-methionine degradation I (to L-homocysteine)	Group 1	0	0	0	0	0	0	0	0	0	0	0	0	0	0	0	0	0	0	0	0	0	0	0	0	0	0	0	0	0	0	0	0	0	0	0	0	0	0	0	0	0	0	0	0	0	0	0	0
Entner-Doudoroff pathway II (non-phosphorylative)	Group 1	0	0	0	0	0	0	0	0	0	0	0	0	0	0	0	0	0	0	0	0	0	0	0	0	0	0	0	0	0	0	0	0	0	0	0	0	0	0	0	0	0	0	0	0	0	0	0	0
Bifidobacterium shunt	Group 1	0	0	0	0	0	0	0	0	0	0	0	0	0	0	0	0	0	0	0	0	0	0	0	0	0	0	0	0	0	0	0	0	0	0	0	0	0	0	0	0	0	0	0	0	0	0	0	0
acetylene degradation (anaerobic)	Group 1	0	0	0	0	0	0	0	0	0	0	0	0	0	0	0	0	0	0	0	0	0	0	0	0	0	0	0	0	0	0	0	0	0	0	0	0	0	0	0	0	0	0	0	0	0	0	0	0
L-lysine fermentation to acetate and butanoate	Group 1	0	0	0	0	0	0	0	0	0	0	0	0	0	0	0	0	0	0	0	0	0	0	0	0	0	0	0	0	0	0	0	0	0	0	0	0	0	0	0	0	0	0	0	0	0	0	0	0
purine nucleobases degradation I (anaerobic)	Group 1	0	0	0	0	0	0	0	0	0	0	0	0	0	0	0	0	0	0	0	0	0	0	0	0	0	0	0	0	0	0	0	0	0	0	0	0	0	0	0	0	0	0	0	0	0	0	0	0
nicotine degradation I (pyridine pathway)	Group 1	0	0	0	0	0	0	0	0	0	0	0	0	0	0	0	0	0	0	0	0	0	0	0	0	0	0	0	0	0	0	0	0	0	0	0	0	0	0	0	0	0	0	0	0	0	0	0	0
nitroglycerin degradation	Group 1	0	0	0	0	0	0	0	0	0	0	0	0	0	0	0	0	0	0	0	0	0	0	0	0	0	0	0	0	0	0	0	0	0	0	0	0	0	0	0	0	0	0	0	0	0	0	0	0
sulfur disproportionation I (anaerobic)	Group 1	0	0	0	0	0	0	0	0	0	0	0	0	0	0	0	0	0	0	0	0	0	0	0	0	0	0	0	0	0	0	0	0	0	0	0	0	0	0	0	0	0	0	0	0	0	0	0	0
reductive TCA cycle I	Group 1	0	0	0	0	0	0	0	0	0	0	0	0	0	0	0	0	0	0	0	0	0	0	0	0	0	0	0	0	0	0	0	0	0	0	0	0	0	0	0	0	0	0	0	0	0	0	0	0
coenzyme B biosynthesis	Group 1	0	0	0	0	0	0	0	0	0	0	0	0	0	0	0	0	0	0	0	0	0	0	0	0	0	0	0	0	0	0	0	0	0	0	0	0	0	0	0	0	0	0	0	0	0	0	0	0
coenzyme M biosynthesis I	Group 1	0	0	0	0	0	0	0	0	0	0	0	0	0	0	0	0	0	0	0	0	0	0	0	0	0	0	0	0	0	0	0	0	0	0	0	0	0	0	0	0	0	0	0	0	0	0	0	0
citrate lyase activation	Group 1	0	0	0	0	0	0	0	0	0	0	0	0	0	0	0	0	0	0	0	0	0	0	0	0	0	0	0	0	0	0	0	0	0	0	0	0	0	0	0	0	0	0	0	0	0	0	0	0
galena oxidation	Group 1	0	0	0	0	0	0	0	0	0	0	0	0	0	0	0	0	0	0	0	0	0	0	0	0	0	0	0	0	0	0	0	0	0	0	0	0	0	0	0	0	0	0	0	0	0	0	0	0
ammonia oxidation II (anaerobic)	Group 1	0	0	0	0	0	0	0	0	0	0	0	0	0	0	0	0	0	0	0	0	0	0	0	0	0	0	0	0	0	0	0	0	0	0	0	0	0	0	0	0	0	0	0	0	0	0	0	0
glycolysis V (Pyrococcus)	Group 1	0	0	0	0	0	0	0	0	0	0	0	0	0	0	0	0	0	0	0	0	0	0	0	0	0	0	0	0	0	0	0	0	0	0	0	0	0	0	0	0	0	0	0	0	0	0	0	0
orcinol degradation	Group 1	0	0	0	0	0	0	0	0	0	0	0	0	0	0	0	0	0	0	0	0	0	0	0	0	0	0	0	0	0	0	0	0	0	0	0	0	0	0	0	0	0	0	0	0	0	0	0	0
gallate degradation III (anaerobic)	Group 1	0	0	0	0	0	0	0	0	0	0	0	0	0	0	0	0	0	0	0	0	0	0	0	0	0	0	0	0	0	0	0	0	0	0	0	0	0	0	0	0	0	0	0	0	0	0	0	0
4-nitrotoluene degradation I	Group 1	0	0	0	0	0	0	0	0	0	0	0	0	0	0	0	0	0	0	0	0	0	0	0	0	0	0	0	0	0	0	0	0	0	0	0	0	0	0	0	0	0	0	0	0	0	0	0	0
adamantanone degradation	Group 1	0	0	0	0	0	0	0	0	0	0	0	0	0	0	0	0	0	0	0	0	0	0	0	0	0	0	0	0	0	0	0	0	0	0	0	0	0	0	0	0	0	0	0	0	0	0	0	0
arsonoacetate degradation	Group 1	0	0	0	0	0	0	0	0	0	0	0	0	0	0	0	0	0	0	0	0	0	0	0	0	0	0	0	0	0	0	0	0	0	0	0	0	0	0	0	0	0	0	0	0	0	0	0	0
phosphonoacetate degradation	Group 1	0	0	0	0	0	0	0	0	0	0	0	0	0	0	0	0	0	0	0	0	0	0	0	0	0	0	0	0	0	0	0	0	0	0	0	0	0	0	0	0	0	0	0	0	0	0	0	0
glycine betaine biosynthesis IV (from glycine)	Group 1	0	0	0	0	0	0	0	0	0	0	0	0	0	0	0	0	0	0	0	0	0	0	0	0	0	0	0	0	0	0	0	0	0	0	0	0	0	0	0	0	0	0	0	0	0	0	0	0
proline betaine degradation I	Group 1	0	0	0	0	0	0	0	0	0	0	0	0	0	0	0	0	0	0	0	0	0	0	0	0	0	0	0	0	0	0	0	0	0	0	0	0	0	0	0	0	0	0	0	0	0	0	0	0
thiocyanate degradation I	Group 1	0	0	0	0	0	0	0	0	0	0	0	0	0	0	0	0	0	0	0	0	0	0	0	0	0	0	0	0	0	0	0	0	0	0	0	0	0	0	0	0	0	0	0	0	0	0	0	0
(+)-camphor degradation	Group 1	0	0	0	0	0	0	0	0	0	0	0	0	0	0	0	0	0	0	0	0	0	0	0	0	0	0	0	0	0	0	0	0	0	0	0	0	0	0	0	0	0	0	0	0	0	0	0	0
phenylmercury acetate degradation	Group 1	0	0	0	0	0	0	0	0	0	0	0	0	0	0	0	0	0	0	0	0	0	0	0	0	0	0	0	0	0	0	0	0	0	0	0	0	0	0	0	0	0	0	0	0	0	0	0	0
dibenzo-p-dioxin degradation	Group 1	0	0	0	0	0	0	0	0	0	0	0	0	0	0	0	0	0	0	0	0	0	0	0	0	0	0	0	0	0	0	0	0	0	0	0	0	0	0	0	0	0	0	0	0	0	0	0	0
parathion degradation	Group 1	0	0	0	0	0	0	0	0	0	0	0	0	0	0	0	0	0	0	0	0	0	0	0	0	0	0	0	0	0	0	0	0	0	0	0	0	0	0	0	0	0	0	0	0	0	0	0	0
tetrachloroethene degradation	Group 1	0	0	0	0	0	0	0	0	0	0	0	0	0	0	0	0	0	0	0	0	0	0	0	0	0	0	0	0	0	0	0	0	0	0	0	0	0	0	0	0	0	0	0	0	0	0	0	0
pentachlorophenol degradation	Group 1	0	0	0	0	0	0	0	0	0	0	0	0	0	0	0	0	0	0	0	0	0	0	0	0	0	0	0	0	0	0	0	0	0	0	0	0	0	0	0	0	0	0	0	0	0	0	0	0
phenol degradation II (anaerobic)	Group 1	0	0	0	0	0	0	0	0	0	0	0	0	0	0	0	0	0	0	0	0	0	0	0	0	0	0	0	0	0	0	0	0	0	0	0	0	0	0	0	0	0	0	0	0	0	0	0	0
propanoyl CoA degradation I	Group 1	0	0	0	0	0	0	0	0	0	0	0	0	0	0	0	0	0	0	0	0	0	0	0	0	0	0	0	0	0	0	0	0	0	0	0	0	0	0	0	0	0	0	0	0	0	0	0	0
NADH to fumarate electron transfer	Group 1	0	0	0	0	0	0	0	0	0	0	0	0	0	0	0	0	0	0	0	0	0	0	0	0	0	0	0	0	0	0	0	0	0	0	0	0	0	0	0	0	0	0	0	0	0	0	0	0
NADH to trimethylamine N-oxide electron transfer	Group 1	0	0	0	0	0	0	0	0	0	0	0	0	0	0	0	0	0	0	0	0	0	0	0	0	0	0	0	0	0	0	0	0	0	0	0	0	0	0	0	0	0	0	0	0	0	0	0	0
NADH to dimethyl sulfoxide electron transfer	Group 1	0	0	0	0	0	0	0	0	0	0	0	0	0	0	0	0	0	0	0	0	0	0	0	0	0	0	0	0	0	0	0	0	0	0	0	0	0	0	0	0	0	0	0	0	0	0	0	0
nitrate reduction VIII (dissimilatory)	Group 1	0	0	0	0	0	0	0	0	0	0	0	0	0	0	0	0	0	0	0	0	0	0	0	0	0	0	0	0	0	0	0	0	0	0	0	0	0	0	0	0	0	0	0	0	0	0	0	0
autoinducer AI-2 degradation	Group 1	0	0	0	0	0	0	0	0	0	0	0	0	0	0	0	0	0	0	0	0	0	0	0	0	0	0	0	0	0	0	0	0	0	0	0	0	0	0	0	0	0	0	0	0	0	0	0	0
peptidoglycan maturation (meso-diaminopimelate containing)	Group 1	0	0	0	0	0	0	0	0	0	0	0	0	0	0	0	0	0	0	0	0	0	0	0	0	0	0	0	0	0	0	0	0	0	0	0	0	0	0	0	0	0	0	0	0	0	0	0	0
NADH to hydrogen peroxide electron transfer	Group 1	0	0	0	0	0	0	0	0	0	0	0	0	0	0	0	0	0	0	0	0	0	0	0	0	0	0	0	0	0	0	0	0	0	0	0	0	0	0	0	0	0	0	0	0	0	0	0	0
glycerol-3-phosphate to hydrogen peroxide electron transport	Group 1	0	0	0	0	0	0	0	0	0	0	0	0	0	0	0	0	0	0	0	0	0	0	0	0	0	0	0	0	0	0	0	0	0	0	0	0	0	0	0	0	0	0	0	0	0	0	0	0
periplasmic disulfide bond formation	Group 1	0	0	0	0	0	0	0	0	0	0	0	0	0	0	0	0	0	0	0	0	0	0	0	0	0	0	0	0	0	0	0	0	0	0	0	0	0	0	0	0	0	0	0	0	0	0	0	0
periplasmic disulfide bond reduction	Group 1	0	0	0	0	0	0	0	0	0	0	0	0	0	0	0	0	0	0	0	0	0	0	0	0	0	0	0	0	0	0	0	0	0	0	0	0	0	0	0	0	0	0	0	0	0	0	0	0
putrescine degradation III	Group 1	0	0	0	0	0	0	0	0	0	0	0	0	0	0	0	0	0	0	0	0	0	0	0	0	0	0	0	0	0	0	0	0	0	0	0	0	0	0	0	0	0	0	0	0	0	0	0	0
photosynthesis light reactions	Group 1	0	0	0	0	0	0	0	0	0	0	0	0	0	0	0	0	0	0	0	0	0	0	0	0	0	0	0	0	0	0	0	0	0	0	0	0	0	0	0	0	0	0	0	0	0	0	0	0
gibberellin inactivation I (2beta-hydroxylation)	Group 1	0	0	0	0	0	0	0	0	0	0	0	0	0	0	0	0	0	0	0	0	0	0	0	0	0	0	0	0	0	0	0	0	0	0	0	0	0	0	0	0	0	0	0	0	0	0	0	0
homogalacturonan biosynthesis	Group 1	0	0	0	0	0	0	0	0	0	0	0	0	0	0	0	0	0	0	0	0	0	0	0	0	0	0	0	0	0	0	0	0	0	0	0	0	0	0	0	0	0	0	0	0	0	0	0	0
homogalacturonan degradation	Group 1	0	0	0	0	0	0	0	0	0	0	0	0	0	0	0	0	0	0	0	0	0	0	0	0	0	0	0	0	0	0	0	0	0	0	0	0	0	0	0	0	0	0	0	0	0	0	0	0
suberin monomers biosynthesis	Group 1	0	0	0	0	0	0	0	0	0	0	0	0	0	0	0	0	0	0	0	0	0	0	0	0	0	0	0	0	0	0	0	0	0	0	0	0	0	0	0	0	0	0	0	0	0	0	0	0
lupeol biosynthesis	Group 1	0	0	0	0	0	0	0	0	0	0	0	0	0	0	0	0	0	0	0	0	0	0	0	0	0	0	0	0	0	0	0	0	0	0	0	0	0	0	0	0	0	0	0	0	0	0	0	0
carbon disulfide oxidation I (anaerobic)	Group 1	0	0	0	0	0	0	0	0	0	0	0	0	0	0	0	0	0	0	0	0	0	0	0	0	0	0	0	0	0	0	0	0	0	0	0	0	0	0	0	0	0	0	0	0	0	0	0	0
coniferin metabolism	Group 1	0	0	0	0	0	0	0	0	0	0	0	0	0	0	0	0	0	0	0	0	0	0	0	0	0	0	0	0	0	0	0	0	0	0	0	0	0	0	0	0	0	0	0	0	0	0	0	0
L-homomethionine biosynthesis	Group 1	0	0	0	0	0	0	0	0	0	0	0	0	0	0	0	0	0	0	0	0	0	0	0	0	0	0	0	0	0	0	0	0	0	0	0	0	0	0	0	0	0	0	0	0	0	0	0	0
glucosinolate biosynthesis from homomethionine	Group 1	0	0	0	0	0	0	0	0	0	0	0	0	0	0	0	0	0	0	0	0	0	0	0	0	0	0	0	0	0	0	0	0	0	0	0	0	0	0	0	0	0	0	0	0	0	0	0	0
phenylacetate degradation II (anaerobic)	Group 1	0	0	0	0	0	0	0	0	0	0	0	0	0	0	0	0	0	0	0	0	0	0	0	0	0	0	0	0	0	0	0	0	0	0	0	0	0	0	0	0	0	0	0	0	0	0	0	0
fluorene degradation II	Group 1	0	0	0	0	0	0	0	0	0	0	0	0	0	0	0	0	0	0	0	0	0	0	0	0	0	0	0	0	0	0	0	0	0	0	0	0	0	0	0	0	0	0	0	0	0	0	0	0
vitamin E biosynthesis (tocopherols)	Group 1	0	0	0	0	0	0	0	0	0	0	0	0	0	0	0	0	0	0	0	0	0	0	0	0	0	0	0	0	0	0	0	0	0	0	0	0	0	0	0	0	0	0	0	0	0	0	0	0
m-xylene degradation (anaerobic)	Group 1	0	0	0	0	0	0	0	0	0	0	0	0	0	0	0	0	0	0	0	0	0	0	0	0	0	0	0	0	0	0	0	0	0	0	0	0	0	0	0	0	0	0	0	0	0	0	0	0
plastoquinol-9 biosynthesis I	Group 1	0	0	0	0	0	0	0	0	0	0	0	0	0	0	0	0	0	0	0	0	0	0	0	0	0	0	0	0	0	0	0	0	0	0	0	0	0	0	0	0	0	0	0	0	0	0	0	0
methane oxidation to methanol I	Group 1	0	0	0	0	0	0	0	0	0	0	0	0	0	0	0	0	0	0	0	0	0	0	0	0	0	0	0	0	0	0	0	0	0	0	0	0	0	0	0	0	0	0	0	0	0	0	0	0
formaldehyde oxidation VI (H4MPT pathway)	Group 1	0	0	0	0	0	0	0	0	0	0	0	0	0	0	0	0	0	0	0	0	0	0	0	0	0	0	0	0	0	0	0	0	0	0	0	0	0	0	0	0	0	0	0	0	0	0	0	0
indole-3-acetate inactivation IX	Group 1	0	0	0	0	0	0	0	0	0	0	0	0	0	0	0	0	0	0	0	0	0	0	0	0	0	0	0	0	0	0	0	0	0	0	0	0	0	0	0	0	0	0	0	0	0	0	0	0
photorespiration	Group 1	0	0	0	0	0	0	0	0	0	0	0	0	0	0	0	0	0	0	0	0	0	0	0	0	0	0	0	0	0	0	0	0	0	0	0	0	0	0	0	0	0	0	0	0	0	0	0	0
indole-3-acetate activation I	Group 1	0	0	0	0	0	0	0	0	0	0	0	0	0	0	0	0	0	0	0	0	0	0	0	0	0	0	0	0	0	0	0	0	0	0	0	0	0	0	0	0	0	0	0	0	0	0	0	0
triacylsucrose biosynthesis (Solanum)	Group 1	0	0	0	0	0	0	0	0	0	0	0	0	0	0	0	0	0	0	0	0	0	0	0	0	0	0	0	0	0	0	0	0	0	0	0	0	0	0	0	0	0	0	0	0	0	0	0	0
tetraacylsucrose biosynthesis (Solanum)	Group 1	0	0	0	0	0	0	0	0	0	0	0	0	0	0	0	0	0	0	0	0	0	0	0	0	0	0	0	0	0	0	0	0	0	0	0	0	0	0	0	0	0	0	0	0	0	0	0	0
cis-abienol biosynthesis	Group 1	0	0	0	0	0	0	0	0	0	0	0	0	0	0	0	0	0	0	0	0	0	0	0	0	0	0	0	0	0	0	0	0	0	0	0	0	0	0	0	0	0	0	0	0	0	0	0	0
acylsucrose biosynthesis (Solanum pennellii)	Group 1	0	0	0	0	0	0	0	0	0	0	0	0	0	0	0	0	0	0	0	0	0	0	0	0	0	0	0	0	0	0	0	0	0	0	0	0	0	0	0	0	0	0	0	0	0	0	0	0
acylsucrose biosynthesis (Solanum habrochaites)	Group 1	0	0	0	0	0	0	0	0	0	0	0	0	0	0	0	0	0	0	0	0	0	0	0	0	0	0	0	0	0	0	0	0	0	0	0	0	0	0	0	0	0	0	0	0	0	0	0	0
labdenediol and sclareol biosynthesis	Group 1	0	0	0	0	0	0	0	0	0	0	0	0	0	0	0	0	0	0	0	0	0	0	0	0	0	0	0	0	0	0	0	0	0	0	0	0	0	0	0	0	0	0	0	0	0	0	0	0
cholesterol biosynthesis (plants, early side-chain reductase)	Group 1	0	0	0	0	0	0	0	0	0	0	0	0	0	0	0	0	0	0	0	0	0	0	0	0	0	0	0	0	0	0	0	0	0	0	0	0	0	0	0	0	0	0	0	0	0	0	0	0
gentisate 5-O-beta-D-xylopyranoside biosynthesis	Group 1	0	0	0	0	0	0	0	0	0	0	0	0	0	0	0	0	0	0	0	0	0	0	0	0	0	0	0	0	0	0	0	0	0	0	0	0	0	0	0	0	0	0	0	0	0	0	0	0
phenylpropanoid volatiles glycoconjugation (tomato)	Group 1	0	0	0	0	0	0	0	0	0	0	0	0	0	0	0	0	0	0	0	0	0	0	0	0	0	0	0	0	0	0	0	0	0	0	0	0	0	0	0	0	0	0	0	0	0	0	0	0
methylsalicylate biosynthesis	Group 1	0	0	0	0	0	0	0	0	0	0	0	0	0	0	0	0	0	0	0	0	0	0	0	0	0	0	0	0	0	0	0	0	0	0	0	0	0	0	0	0	0	0	0	0	0	0	0	0
solasodine and soladulcidine biosynthesis	Group 1	0	0	0	0	0	0	0	0	0	0	0	0	0	0	0	0	0	0	0	0	0	0	0	0	0	0	0	0	0	0	0	0	0	0	0	0	0	0	0	0	0	0	0	0	0	0	0	0
&alpha;-tomatine biosynthesis	Group 1	0	0	0	0	0	0	0	0	0	0	0	0	0	0	0	0	0	0	0	0	0	0	0	0	0	0	0	0	0	0	0	0	0	0	0	0	0	0	0	0	0	0	0	0	0	0	0	0
solasodine glycosylation	Group 1	0	0	0	0	0	0	0	0	0	0	0	0	0	0	0	0	0	0	0	0	0	0	0	0	0	0	0	0	0	0	0	0	0	0	0	0	0	0	0	0	0	0	0	0	0	0	0	0
&alpha;-tomatine degradation	Group 1	0	0	0	0	0	0	0	0	0	0	0	0	0	0	0	0	0	0	0	0	0	0	0	0	0	0	0	0	0	0	0	0	0	0	0	0	0	0	0	0	0	0	0	0	0	0	0	0
cembratrienediol biosynthesis	Group 1	0	0	0	0	0	0	0	0	0	0	0	0	0	0	0	0	0	0	0	0	0	0	0	0	0	0	0	0	0	0	0	0	0	0	0	0	0	0	0	0	0	0	0	0	0	0	0	0
monoacylsucrose biosynthesis (Solanum)	Group 1	0	0	0	0	0	0	0	0	0	0	0	0	0	0	0	0	0	0	0	0	0	0	0	0	0	0	0	0	0	0	0	0	0	0	0	0	0	0	0	0	0	0	0	0	0	0	0	0
diacylsucrose biosynthesis (Solanum)	Group 1	0	0	0	0	0	0	0	0	0	0	0	0	0	0	0	0	0	0	0	0	0	0	0	0	0	0	0	0	0	0	0	0	0	0	0	0	0	0	0	0	0	0	0	0	0	0	0	0
decaprenoxanthin diglucoside biosynthesis	Group 1	0	0	0	0	0	0	0	0	0	0	0	0	0	0	0	0	0	0	0	0	0	0	0	0	0	0	0	0	0	0	0	0	0	0	0	0	0	0	0	0	0	0	0	0	0	0	0	0
aurone biosynthesis	Group 1	0	0	0	0	0	0	0	0	0	0	0	0	0	0	0	0	0	0	0	0	0	0	0	0	0	0	0	0	0	0	0	0	0	0	0	0	0	0	0	0	0	0	0	0	0	0	0	0
indole-3-acetate activation II	Group 1	0	0	0	0	0	0	0	0	0	0	0	0	0	0	0	0	0	0	0	0	0	0	0	0	0	0	0	0	0	0	0	0	0	0	0	0	0	0	0	0	0	0	0	0	0	0	0	0
indole-3-acetate inactivation I	Group 1	0	0	0	0	0	0	0	0	0	0	0	0	0	0	0	0	0	0	0	0	0	0	0	0	0	0	0	0	0	0	0	0	0	0	0	0	0	0	0	0	0	0	0	0	0	0	0	0
indole-3-acetate inactivation II	Group 1	0	0	0	0	0	0	0	0	0	0	0	0	0	0	0	0	0	0	0	0	0	0	0	0	0	0	0	0	0	0	0	0	0	0	0	0	0	0	0	0	0	0	0	0	0	0	0	0
indole-3-acetate inactivation III	Group 1	0	0	0	0	0	0	0	0	0	0	0	0	0	0	0	0	0	0	0	0	0	0	0	0	0	0	0	0	0	0	0	0	0	0	0	0	0	0	0	0	0	0	0	0	0	0	0	0
actinorhodin biosynthesis	Group 1	0	0	0	0	0	0	0	0	0	0	0	0	0	0	0	0	0	0	0	0	0	0	0	0	0	0	0	0	0	0	0	0	0	0	0	0	0	0	0	0	0	0	0	0	0	0	0	0
phenylpropanoid biosynthesis, initial reactions	Group 1	0	0	0	0	0	0	0	0	0	0	0	0	0	0	0	0	0	0	0	0	0	0	0	0	0	0	0	0	0	0	0	0	0	0	0	0	0	0	0	0	0	0	0	0	0	0	0	0
leucopelargonidin and leucocyanidin biosynthesis	Group 1	0	0	0	0	0	0	0	0	0	0	0	0	0	0	0	0	0	0	0	0	0	0	0	0	0	0	0	0	0	0	0	0	0	0	0	0	0	0	0	0	0	0	0	0	0	0	0	0
flavonoid biosynthesis	Group 1	0	0	0	0	0	0	0	0	0	0	0	0	0	0	0	0	0	0	0	0	0	0	0	0	0	0	0	0	0	0	0	0	0	0	0	0	0	0	0	0	0	0	0	0	0	0	0	0
mycothiol biosynthesis	Group 1	0	0	0	0	0	0	0	0	0	0	0	0	0	0	0	0	0	0	0	0	0	0	0	0	0	0	0	0	0	0	0	0	0	0	0	0	0	0	0	0	0	0	0	0	0	0	0	0
formaldehyde oxidation III (mycothiol-dependent)	Group 1	0	0	0	0	0	0	0	0	0	0	0	0	0	0	0	0	0	0	0	0	0	0	0	0	0	0	0	0	0	0	0	0	0	0	0	0	0	0	0	0	0	0	0	0	0	0	0	0
mycothiol-mediated detoxification	Group 1	0	0	0	0	0	0	0	0	0	0	0	0	0	0	0	0	0	0	0	0	0	0	0	0	0	0	0	0	0	0	0	0	0	0	0	0	0	0	0	0	0	0	0	0	0	0	0	0
fructosyllysine and glucosyllysine metabolism	Group 1	0	0	0	0	0	0	0	0	0	0	0	0	0	0	0	0	0	0	0	0	0	0	0	0	0	0	0	0	0	0	0	0	0	0	0	0	0	0	0	0	0	0	0	0	0	0	0	0
arsenate detoxification V	Group 1	0	0	0	0	0	0	0	0	0	0	0	0	0	0	0	0	0	0	0	0	0	0	0	0	0	0	0	0	0	0	0	0	0	0	0	0	0	0	0	0	0	0	0	0	0	0	0	0
aerobic respiration (NDH-1 to cytochrome c oxidase via plastocyanin)	Group 1	0	0	0	0	0	0	0	0	0	0	0	0	0	0	0	0	0	0	0	0	0	0	0	0	0	0	0	0	0	0	0	0	0	0	0	0	0	0	0	0	0	0	0	0	0	0	0	0
aerobic respiration in cyanobacteria (NDH-2 to cytochrome c oxidase via plastocyanin)	Group 1	0	0	0	0	0	0	0	0	0	0	0	0	0	0	0	0	0	0	0	0	0	0	0	0	0	0	0	0	0	0	0	0	0	0	0	0	0	0	0	0	0	0	0	0	0	0	0	0
protective electron sinks in the thylakoid membrane (PSII to PTOX)	Group 1	0	0	0	0	0	0	0	0	0	0	0	0	0	0	0	0	0	0	0	0	0	0	0	0	0	0	0	0	0	0	0	0	0	0	0	0	0	0	0	0	0	0	0	0	0	0	0	0
isoflavonoid biosynthesis I	Group 1	0	0	0	0	0	0	0	0	0	0	0	0	0	0	0	0	0	0	0	0	0	0	0	0	0	0	0	0	0	0	0	0	0	0	0	0	0	0	0	0	0	0	0	0	0	0	0	0
indole-3-acetate inactivation IV	Group 1	0	0	0	0	0	0	0	0	0	0	0	0	0	0	0	0	0	0	0	0	0	0	0	0	0	0	0	0	0	0	0	0	0	0	0	0	0	0	0	0	0	0	0	0	0	0	0	0
isoflavonoid biosynthesis II	Group 1	0	0	0	0	0	0	0	0	0	0	0	0	0	0	0	0	0	0	0	0	0	0	0	0	0	0	0	0	0	0	0	0	0	0	0	0	0	0	0	0	0	0	0	0	0	0	0	0
glutamate removal from folates	Group 1	0	0	0	0	0	0	0	0	0	0	0	0	0	0	0	0	0	0	0	0	0	0	0	0	0	0	0	0	0	0	0	0	0	0	0	0	0	0	0	0	0	0	0	0	0	0	0	0
free phenylpropanoid acid biosynthesis	Group 1	0	0	0	0	0	0	0	0	0	0	0	0	0	0	0	0	0	0	0	0	0	0	0	0	0	0	0	0	0	0	0	0	0	0	0	0	0	0	0	0	0	0	0	0	0	0	0	0
ammonia oxidation III	Group 1	0	0	0	0	0	0	0	0	0	0	0	0	0	0	0	0	0	0	0	0	0	0	0	0	0	0	0	0	0	0	0	0	0	0	0	0	0	0	0	0	0	0	0	0	0	0	0	0
ascorbate glutathione cycle	Group 1	0	0	0	0	0	0	0	0	0	0	0	0	0	0	0	0	0	0	0	0	0	0	0	0	0	0	0	0	0	0	0	0	0	0	0	0	0	0	0	0	0	0	0	0	0	0	0	0
myo-inositol biosynthesis	Group 1	0	0	0	0	0	0	0	0	0	0	0	0	0	0	0	0	0	0	0	0	0	0	0	0	0	0	0	0	0	0	0	0	0	0	0	0	0	0	0	0	0	0	0	0	0	0	0	0
formononetin biosynthesis	Group 1	0	0	0	0	0	0	0	0	0	0	0	0	0	0	0	0	0	0	0	0	0	0	0	0	0	0	0	0	0	0	0	0	0	0	0	0	0	0	0	0	0	0	0	0	0	0	0	0
daidzein conjugates interconversion	Group 1	0	0	0	0	0	0	0	0	0	0	0	0	0	0	0	0	0	0	0	0	0	0	0	0	0	0	0	0	0	0	0	0	0	0	0	0	0	0	0	0	0	0	0	0	0	0	0	0
genistein conjugates interconversion	Group 1	0	0	0	0	0	0	0	0	0	0	0	0	0	0	0	0	0	0	0	0	0	0	0	0	0	0	0	0	0	0	0	0	0	0	0	0	0	0	0	0	0	0	0	0	0	0	0	0
4-nitrobenzoate degradation	Group 1	0	0	0	0	0	0	0	0	0	0	0	0	0	0	0	0	0	0	0	0	0	0	0	0	0	0	0	0	0	0	0	0	0	0	0	0	0	0	0	0	0	0	0	0	0	0	0	0
C4 photosynthetic carbon assimilation cycle, NADP-ME type	Group 1	0	0	0	0	0	0	0	0	0	0	0	0	0	0	0	0	0	0	0	0	0	0	0	0	0	0	0	0	0	0	0	0	0	0	0	0	0	0	0	0	0	0	0	0	0	0	0	0
(-)-medicarpin biosynthesis	Group 1	0	0	0	0	0	0	0	0	0	0	0	0	0	0	0	0	0	0	0	0	0	0	0	0	0	0	0	0	0	0	0	0	0	0	0	0	0	0	0	0	0	0	0	0	0	0	0	0
(-)-maackiain biosynthesis	Group 1	0	0	0	0	0	0	0	0	0	0	0	0	0	0	0	0	0	0	0	0	0	0	0	0	0	0	0	0	0	0	0	0	0	0	0	0	0	0	0	0	0	0	0	0	0	0	0	0
(+)-pisatin biosynthesis	Group 1	0	0	0	0	0	0	0	0	0	0	0	0	0	0	0	0	0	0	0	0	0	0	0	0	0	0	0	0	0	0	0	0	0	0	0	0	0	0	0	0	0	0	0	0	0	0	0	0
fatty acid &alpha;-oxidation I (plants)	Group 1	0	0	0	0	0	0	0	0	0	0	0	0	0	0	0	0	0	0	0	0	0	0	0	0	0	0	0	0	0	0	0	0	0	0	0	0	0	0	0	0	0	0	0	0	0	0	0	0
phytosterol biosynthesis (plants)	Group 1	0	0	0	0	0	0	0	0	0	0	0	0	0	0	0	0	0	0	0	0	0	0	0	0	0	0	0	0	0	0	0	0	0	0	0	0	0	0	0	0	0	0	0	0	0	0	0	0
medicarpin conjugates interconversion	Group 1	0	0	0	0	0	0	0	0	0	0	0	0	0	0	0	0	0	0	0	0	0	0	0	0	0	0	0	0	0	0	0	0	0	0	0	0	0	0	0	0	0	0	0	0	0	0	0	0
brassinosteroid biosynthesis II	Group 1	0	0	0	0	0	0	0	0	0	0	0	0	0	0	0	0	0	0	0	0	0	0	0	0	0	0	0	0	0	0	0	0	0	0	0	0	0	0	0	0	0	0	0	0	0	0	0	0
trans-zeatin biosynthesis	Group 1	0	0	0	0	0	0	0	0	0	0	0	0	0	0	0	0	0	0	0	0	0	0	0	0	0	0	0	0	0	0	0	0	0	0	0	0	0	0	0	0	0	0	0	0	0	0	0	0
maackiain conjugates interconversion	Group 1	0	0	0	0	0	0	0	0	0	0	0	0	0	0	0	0	0	0	0	0	0	0	0	0	0	0	0	0	0	0	0	0	0	0	0	0	0	0	0	0	0	0	0	0	0	0	0	0
(-)-glycinol biosynthesis	Group 1	0	0	0	0	0	0	0	0	0	0	0	0	0	0	0	0	0	0	0	0	0	0	0	0	0	0	0	0	0	0	0	0	0	0	0	0	0	0	0	0	0	0	0	0	0	0	0	0
glyceollin biosynthesis	Group 1	0	0	0	0	0	0	0	0	0	0	0	0	0	0	0	0	0	0	0	0	0	0	0	0	0	0	0	0	0	0	0	0	0	0	0	0	0	0	0	0	0	0	0	0	0	0	0	0
cis-zeatin biosynthesis	Group 1	0	0	0	0	0	0	0	0	0	0	0	0	0	0	0	0	0	0	0	0	0	0	0	0	0	0	0	0	0	0	0	0	0	0	0	0	0	0	0	0	0	0	0	0	0	0	0	0
glucosinolate biosynthesis from phenylalanine	Group 1	0	0	0	0	0	0	0	0	0	0	0	0	0	0	0	0	0	0	0	0	0	0	0	0	0	0	0	0	0	0	0	0	0	0	0	0	0	0	0	0	0	0	0	0	0	0	0	0
cuticular wax biosynthesis	Group 1	0	0	0	0	0	0	0	0	0	0	0	0	0	0	0	0	0	0	0	0	0	0	0	0	0	0	0	0	0	0	0	0	0	0	0	0	0	0	0	0	0	0	0	0	0	0	0	0
cytokinins degradation	Group 1	0	0	0	0	0	0	0	0	0	0	0	0	0	0	0	0	0	0	0	0	0	0	0	0	0	0	0	0	0	0	0	0	0	0	0	0	0	0	0	0	0	0	0	0	0	0	0	0
biochanin A conjugates interconversion	Group 1	0	0	0	0	0	0	0	0	0	0	0	0	0	0	0	0	0	0	0	0	0	0	0	0	0	0	0	0	0	0	0	0	0	0	0	0	0	0	0	0	0	0	0	0	0	0	0	0
cytokinins 7-N-glucoside biosynthesis	Group 1	0	0	0	0	0	0	0	0	0	0	0	0	0	0	0	0	0	0	0	0	0	0	0	0	0	0	0	0	0	0	0	0	0	0	0	0	0	0	0	0	0	0	0	0	0	0	0	0
cytokinins 9-N-glucoside biosynthesis	Group 1	0	0	0	0	0	0	0	0	0	0	0	0	0	0	0	0	0	0	0	0	0	0	0	0	0	0	0	0	0	0	0	0	0	0	0	0	0	0	0	0	0	0	0	0	0	0	0	0
cytokinin-O-glucosides biosynthesis	Group 1	0	0	0	0	0	0	0	0	0	0	0	0	0	0	0	0	0	0	0	0	0	0	0	0	0	0	0	0	0	0	0	0	0	0	0	0	0	0	0	0	0	0	0	0	0	0	0	0
formononetin conjugates interconversion	Group 1	0	0	0	0	0	0	0	0	0	0	0	0	0	0	0	0	0	0	0	0	0	0	0	0	0	0	0	0	0	0	0	0	0	0	0	0	0	0	0	0	0	0	0	0	0	0	0	0
capsidiol biosynthesis	Group 1	0	0	0	0	0	0	0	0	0	0	0	0	0	0	0	0	0	0	0	0	0	0	0	0	0	0	0	0	0	0	0	0	0	0	0	0	0	0	0	0	0	0	0	0	0	0	0	0
sesquiterpenoid phytoalexins biosynthesis	Group 1	0	0	0	0	0	0	0	0	0	0	0	0	0	0	0	0	0	0	0	0	0	0	0	0	0	0	0	0	0	0	0	0	0	0	0	0	0	0	0	0	0	0	0	0	0	0	0	0
diterpene phytoalexins precursors biosynthesis	Group 1	0	0	0	0	0	0	0	0	0	0	0	0	0	0	0	0	0	0	0	0	0	0	0	0	0	0	0	0	0	0	0	0	0	0	0	0	0	0	0	0	0	0	0	0	0	0	0	0
putrescine degradation IV	Group 1	0	0	0	0	0	0	0	0	0	0	0	0	0	0	0	0	0	0	0	0	0	0	0	0	0	0	0	0	0	0	0	0	0	0	0	0	0	0	0	0	0	0	0	0	0	0	0	0
linamarin biosynthesis	Group 1	0	0	0	0	0	0	0	0	0	0	0	0	0	0	0	0	0	0	0	0	0	0	0	0	0	0	0	0	0	0	0	0	0	0	0	0	0	0	0	0	0	0	0	0	0	0	0	0
monoterpene biosynthesis	Group 1	0	0	0	0	0	0	0	0	0	0	0	0	0	0	0	0	0	0	0	0	0	0	0	0	0	0	0	0	0	0	0	0	0	0	0	0	0	0	0	0	0	0	0	0	0	0	0	0
phaseollin biosynthesis	Group 1	0	0	0	0	0	0	0	0	0	0	0	0	0	0	0	0	0	0	0	0	0	0	0	0	0	0	0	0	0	0	0	0	0	0	0	0	0	0	0	0	0	0	0	0	0	0	0	0
menthol biosynthesis	Group 1	0	0	0	0	0	0	0	0	0	0	0	0	0	0	0	0	0	0	0	0	0	0	0	0	0	0	0	0	0	0	0	0	0	0	0	0	0	0	0	0	0	0	0	0	0	0	0	0
L-lysine biosynthesis V	Group 1	0	0	0	0	0	0	0	0	0	0	0	0	0	0	0	0	0	0	0	0	0	0	0	0	0	0	0	0	0	0	0	0	0	0	0	0	0	0	0	0	0	0	0	0	0	0	0	0
flavonol biosynthesis	Group 1	0	0	0	0	0	0	0	0	0	0	0	0	0	0	0	0	0	0	0	0	0	0	0	0	0	0	0	0	0	0	0	0	0	0	0	0	0	0	0	0	0	0	0	0	0	0	0	0
linamarin degradation	Group 1	0	0	0	0	0	0	0	0	0	0	0	0	0	0	0	0	0	0	0	0	0	0	0	0	0	0	0	0	0	0	0	0	0	0	0	0	0	0	0	0	0	0	0	0	0	0	0	0
indole-3-acetate biosynthesis III (bacteria)	Group 1	0	0	0	0	0	0	0	0	0	0	0	0	0	0	0	0	0	0	0	0	0	0	0	0	0	0	0	0	0	0	0	0	0	0	0	0	0	0	0	0	0	0	0	0	0	0	0	0
L-tryptophan degradation V (side chain pathway)	Group 1	0	0	0	0	0	0	0	0	0	0	0	0	0	0	0	0	0	0	0	0	0	0	0	0	0	0	0	0	0	0	0	0	0	0	0	0	0	0	0	0	0	0	0	0	0	0	0	0
L-tryptophan degradation VI (via tryptamine)	Group 1	0	0	0	0	0	0	0	0	0	0	0	0	0	0	0	0	0	0	0	0	0	0	0	0	0	0	0	0	0	0	0	0	0	0	0	0	0	0	0	0	0	0	0	0	0	0	0	0
canavanine degradation	Group 1	0	0	0	0	0	0	0	0	0	0	0	0	0	0	0	0	0	0	0	0	0	0	0	0	0	0	0	0	0	0	0	0	0	0	0	0	0	0	0	0	0	0	0	0	0	0	0	0
cutin biosynthesis	Group 1	0	0	0	0	0	0	0	0	0	0	0	0	0	0	0	0	0	0	0	0	0	0	0	0	0	0	0	0	0	0	0	0	0	0	0	0	0	0	0	0	0	0	0	0	0	0	0	0
UDP-beta-L-rhamnose biosynthesis	Group 1	0	0	0	0	0	0	0	0	0	0	0	0	0	0	0	0	0	0	0	0	0	0	0	0	0	0	0	0	0	0	0	0	0	0	0	0	0	0	0	0	0	0	0	0	0	0	0	0
sinapate ester biosynthesis	Group 1	0	0	0	0	0	0	0	0	0	0	0	0	0	0	0	0	0	0	0	0	0	0	0	0	0	0	0	0	0	0	0	0	0	0	0	0	0	0	0	0	0	0	0	0	0	0	0	0
choline biosynthesis I	Group 1	0	0	0	0	0	0	0	0	0	0	0	0	0	0	0	0	0	0	0	0	0	0	0	0	0	0	0	0	0	0	0	0	0	0	0	0	0	0	0	0	0	0	0	0	0	0	0	0
L-tyrosine biosynthesis II	Group 1	0	0	0	0	0	0	0	0	0	0	0	0	0	0	0	0	0	0	0	0	0	0	0	0	0	0	0	0	0	0	0	0	0	0	0	0	0	0	0	0	0	0	0	0	0	0	0	0
choline biosynthesis II	Group 1	0	0	0	0	0	0	0	0	0	0	0	0	0	0	0	0	0	0	0	0	0	0	0	0	0	0	0	0	0	0	0	0	0	0	0	0	0	0	0	0	0	0	0	0	0	0	0	0
choline biosynthesis III	Group 1	0	0	0	0	0	0	0	0	0	0	0	0	0	0	0	0	0	0	0	0	0	0	0	0	0	0	0	0	0	0	0	0	0	0	0	0	0	0	0	0	0	0	0	0	0	0	0	0
(S)-reticuline biosynthesis I	Group 1	0	0	0	0	0	0	0	0	0	0	0	0	0	0	0	0	0	0	0	0	0	0	0	0	0	0	0	0	0	0	0	0	0	0	0	0	0	0	0	0	0	0	0	0	0	0	0	0
L-carnitine degradation II	Group 1	0	0	0	0	0	0	0	0	0	0	0	0	0	0	0	0	0	0	0	0	0	0	0	0	0	0	0	0	0	0	0	0	0	0	0	0	0	0	0	0	0	0	0	0	0	0	0	0
phenylpropanoid biosynthesis	Group 1	0	0	0	0	0	0	0	0	0	0	0	0	0	0	0	0	0	0	0	0	0	0	0	0	0	0	0	0	0	0	0	0	0	0	0	0	0	0	0	0	0	0	0	0	0	0	0	0
sucrose degradation II (sucrose synthase)	Group 1	0	0	0	0	0	0	0	0	0	0	0	0	0	0	0	0	0	0	0	0	0	0	0	0	0	0	0	0	0	0	0	0	0	0	0	0	0	0	0	0	0	0	0	0	0	0	0	0
nitrate reduction II (assimilatory)	Group 1	0	0	0	0	0	0	0	0	0	0	0	0	0	0	0	0	0	0	0	0	0	0	0	0	0	0	0	0	0	0	0	0	0	0	0	0	0	0	0	0	0	0	0	0	0	0	0	0
mannitol biosynthesis	Group 1	0	0	0	0	0	0	0	0	0	0	0	0	0	0	0	0	0	0	0	0	0	0	0	0	0	0	0	0	0	0	0	0	0	0	0	0	0	0	0	0	0	0	0	0	0	0	0	0
berberine biosynthesis	Group 1	0	0	0	0	0	0	0	0	0	0	0	0	0	0	0	0	0	0	0	0	0	0	0	0	0	0	0	0	0	0	0	0	0	0	0	0	0	0	0	0	0	0	0	0	0	0	0	0
phosphopantothenate biosynthesis II	Group 1	0	0	0	0	0	0	0	0	0	0	0	0	0	0	0	0	0	0	0	0	0	0	0	0	0	0	0	0	0	0	0	0	0	0	0	0	0	0	0	0	0	0	0	0	0	0	0	0
sphingomyelin metabolism	Group 1	0	0	0	0	0	0	0	0	0	0	0	0	0	0	0	0	0	0	0	0	0	0	0	0	0	0	0	0	0	0	0	0	0	0	0	0	0	0	0	0	0	0	0	0	0	0	0	0
ceramide de novo biosynthesis	Group 1	0	0	0	0	0	0	0	0	0	0	0	0	0	0	0	0	0	0	0	0	0	0	0	0	0	0	0	0	0	0	0	0	0	0	0	0	0	0	0	0	0	0	0	0	0	0	0	0
L-ascorbate biosynthesis IV (animals, D-glucuronate pathway)	Group 1	0	0	0	0	0	0	0	0	0	0	0	0	0	0	0	0	0	0	0	0	0	0	0	0	0	0	0	0	0	0	0	0	0	0	0	0	0	0	0	0	0	0	0	0	0	0	0	0
ubiquinol-6 biosynthesis (late decarboxylation)	Group 1	0	0	0	0	0	0	0	0	0	0	0	0	0	0	0	0	0	0	0	0	0	0	0	0	0	0	0	0	0	0	0	0	0	0	0	0	0	0	0	0	0	0	0	0	0	0	0	0
L-tyrosine degradation III	Group 1	0	0	0	0	0	0	0	0	0	0	0	0	0	0	0	0	0	0	0	0	0	0	0	0	0	0	0	0	0	0	0	0	0	0	0	0	0	0	0	0	0	0	0	0	0	0	0	0
pyruvate fermentation to acetoin III	Group 1	0	0	0	0	0	0	0	0	0	0	0	0	0	0	0	0	0	0	0	0	0	0	0	0	0	0	0	0	0	0	0	0	0	0	0	0	0	0	0	0	0	0	0	0	0	0	0	0
phosphatidylcholine biosynthesis I	Group 1	0	0	0	0	0	0	0	0	0	0	0	0	0	0	0	0	0	0	0	0	0	0	0	0	0	0	0	0	0	0	0	0	0	0	0	0	0	0	0	0	0	0	0	0	0	0	0	0
dehydro-D-arabinono-1,4-lactone biosynthesis	Group 1	0	0	0	0	0	0	0	0	0	0	0	0	0	0	0	0	0	0	0	0	0	0	0	0	0	0	0	0	0	0	0	0	0	0	0	0	0	0	0	0	0	0	0	0	0	0	0	0
L-asparagine degradation II	Group 1	0	0	0	0	0	0	0	0	0	0	0	0	0	0	0	0	0	0	0	0	0	0	0	0	0	0	0	0	0	0	0	0	0	0	0	0	0	0	0	0	0	0	0	0	0	0	0	0
galactolipid biosynthesis I	Group 1	0	0	0	0	0	0	0	0	0	0	0	0	0	0	0	0	0	0	0	0	0	0	0	0	0	0	0	0	0	0	0	0	0	0	0	0	0	0	0	0	0	0	0	0	0	0	0	0
beta-alanine betaine biosynthesis	Group 1	0	0	0	0	0	0	0	0	0	0	0	0	0	0	0	0	0	0	0	0	0	0	0	0	0	0	0	0	0	0	0	0	0	0	0	0	0	0	0	0	0	0	0	0	0	0	0	0
glutathione-mediated detoxification I	Group 1	0	0	0	0	0	0	0	0	0	0	0	0	0	0	0	0	0	0	0	0	0	0	0	0	0	0	0	0	0	0	0	0	0	0	0	0	0	0	0	0	0	0	0	0	0	0	0	0
glutathione amide metabolism	Group 1	0	0	0	0	0	0	0	0	0	0	0	0	0	0	0	0	0	0	0	0	0	0	0	0	0	0	0	0	0	0	0	0	0	0	0	0	0	0	0	0	0	0	0	0	0	0	0	0
volatile cinnamoic ester biosynthesis	Group 1	0	0	0	0	0	0	0	0	0	0	0	0	0	0	0	0	0	0	0	0	0	0	0	0	0	0	0	0	0	0	0	0	0	0	0	0	0	0	0	0	0	0	0	0	0	0	0	0
arsenate detoxification I (mammalian)	Group 1	0	0	0	0	0	0	0	0	0	0	0	0	0	0	0	0	0	0	0	0	0	0	0	0	0	0	0	0	0	0	0	0	0	0	0	0	0	0	0	0	0	0	0	0	0	0	0	0
volatile benzenoid biosynthesis I (ester formation)	Group 1	0	0	0	0	0	0	0	0	0	0	0	0	0	0	0	0	0	0	0	0	0	0	0	0	0	0	0	0	0	0	0	0	0	0	0	0	0	0	0	0	0	0	0	0	0	0	0	0
L-proline biosynthesis IV	Group 1	0	0	0	0	0	0	0	0	0	0	0	0	0	0	0	0	0	0	0	0	0	0	0	0	0	0	0	0	0	0	0	0	0	0	0	0	0	0	0	0	0	0	0	0	0	0	0	0
L-glutamate degradation IV	Group 1	0	0	0	0	0	0	0	0	0	0	0	0	0	0	0	0	0	0	0	0	0	0	0	0	0	0	0	0	0	0	0	0	0	0	0	0	0	0	0	0	0	0	0	0	0	0	0	0
curcumin glucoside biosynthesis	Group 1	0	0	0	0	0	0	0	0	0	0	0	0	0	0	0	0	0	0	0	0	0	0	0	0	0	0	0	0	0	0	0	0	0	0	0	0	0	0	0	0	0	0	0	0	0	0	0	0
DIMBOA-glucoside activation	Group 1	0	0	0	0	0	0	0	0	0	0	0	0	0	0	0	0	0	0	0	0	0	0	0	0	0	0	0	0	0	0	0	0	0	0	0	0	0	0	0	0	0	0	0	0	0	0	0	0
wighteone and luteone biosynthesis	Group 1	0	0	0	0	0	0	0	0	0	0	0	0	0	0	0	0	0	0	0	0	0	0	0	0	0	0	0	0	0	0	0	0	0	0	0	0	0	0	0	0	0	0	0	0	0	0	0	0
arsenite oxidation I (respiratory)	Group 1	0	0	0	0	0	0	0	0	0	0	0	0	0	0	0	0	0	0	0	0	0	0	0	0	0	0	0	0	0	0	0	0	0	0	0	0	0	0	0	0	0	0	0	0	0	0	0	0
1D-myo-inositol hexakisphosphate biosynthesis III (Spirodela polyrrhiza)	Group 1	0	0	0	0	0	0	0	0	0	0	0	0	0	0	0	0	0	0	0	0	0	0	0	0	0	0	0	0	0	0	0	0	0	0	0	0	0	0	0	0	0	0	0	0	0	0	0	0
kievitone biosynthesis	Group 1	0	0	0	0	0	0	0	0	0	0	0	0	0	0	0	0	0	0	0	0	0	0	0	0	0	0	0	0	0	0	0	0	0	0	0	0	0	0	0	0	0	0	0	0	0	0	0	0
putrescine biosynthesis III	Group 1	0	0	0	0	0	0	0	0	0	0	0	0	0	0	0	0	0	0	0	0	0	0	0	0	0	0	0	0	0	0	0	0	0	0	0	0	0	0	0	0	0	0	0	0	0	0	0	0
phytate degradation I	Group 1	0	0	0	0	0	0	0	0	0	0	0	0	0	0	0	0	0	0	0	0	0	0	0	0	0	0	0	0	0	0	0	0	0	0	0	0	0	0	0	0	0	0	0	0	0	0	0	0
creatinine degradation II	Group 1	0	0	0	0	0	0	0	0	0	0	0	0	0	0	0	0	0	0	0	0	0	0	0	0	0	0	0	0	0	0	0	0	0	0	0	0	0	0	0	0	0	0	0	0	0	0	0	0
creatinine degradation III	Group 1	0	0	0	0	0	0	0	0	0	0	0	0	0	0	0	0	0	0	0	0	0	0	0	0	0	0	0	0	0	0	0	0	0	0	0	0	0	0	0	0	0	0	0	0	0	0	0	0
phytate degradation II	Group 1	0	0	0	0	0	0	0	0	0	0	0	0	0	0	0	0	0	0	0	0	0	0	0	0	0	0	0	0	0	0	0	0	0	0	0	0	0	0	0	0	0	0	0	0	0	0	0	0
aloesone biosynthesis I	Group 1	0	0	0	0	0	0	0	0	0	0	0	0	0	0	0	0	0	0	0	0	0	0	0	0	0	0	0	0	0	0	0	0	0	0	0	0	0	0	0	0	0	0	0	0	0	0	0	0
ethylbenzene degradation (anaerobic)	Group 1	0	0	0	0	0	0	0	0	0	0	0	0	0	0	0	0	0	0	0	0	0	0	0	0	0	0	0	0	0	0	0	0	0	0	0	0	0	0	0	0	0	0	0	0	0	0	0	0
UDP-&alpha;-D-glucuronate biosynthesis (from myo-inositol)	Group 1	0	0	0	0	0	0	0	0	0	0	0	0	0	0	0	0	0	0	0	0	0	0	0	0	0	0	0	0	0	0	0	0	0	0	0	0	0	0	0	0	0	0	0	0	0	0	0	0
nitrate reduction VI (assimilatory)	Group 1	0	0	0	0	0	0	0	0	0	0	0	0	0	0	0	0	0	0	0	0	0	0	0	0	0	0	0	0	0	0	0	0	0	0	0	0	0	0	0	0	0	0	0	0	0	0	0	0
6-methoxymellein biosynthesis	Group 1	0	0	0	0	0	0	0	0	0	0	0	0	0	0	0	0	0	0	0	0	0	0	0	0	0	0	0	0	0	0	0	0	0	0	0	0	0	0	0	0	0	0	0	0	0	0	0	0
sterculate biosynthesis	Group 1	0	0	0	0	0	0	0	0	0	0	0	0	0	0	0	0	0	0	0	0	0	0	0	0	0	0	0	0	0	0	0	0	0	0	0	0	0	0	0	0	0	0	0	0	0	0	0	0
beta-pyrazole-1-ylalanine biosynthesis	Group 1	0	0	0	0	0	0	0	0	0	0	0	0	0	0	0	0	0	0	0	0	0	0	0	0	0	0	0	0	0	0	0	0	0	0	0	0	0	0	0	0	0	0	0	0	0	0	0	0
L-ascorbate biosynthesis II (plants, L-gulose pathway)	Group 1	0	0	0	0	0	0	0	0	0	0	0	0	0	0	0	0	0	0	0	0	0	0	0	0	0	0	0	0	0	0	0	0	0	0	0	0	0	0	0	0	0	0	0	0	0	0	0	0
VTC2 cycle	Group 1	0	0	0	0	0	0	0	0	0	0	0	0	0	0	0	0	0	0	0	0	0	0	0	0	0	0	0	0	0	0	0	0	0	0	0	0	0	0	0	0	0	0	0	0	0	0	0	0
extended VTC2 cycle	Group 1	0	0	0	0	0	0	0	0	0	0	0	0	0	0	0	0	0	0	0	0	0	0	0	0	0	0	0	0	0	0	0	0	0	0	0	0	0	0	0	0	0	0	0	0	0	0	0	0
abscisic acid biosynthesis shunt	Group 1	0	0	0	0	0	0	0	0	0	0	0	0	0	0	0	0	0	0	0	0	0	0	0	0	0	0	0	0	0	0	0	0	0	0	0	0	0	0	0	0	0	0	0	0	0	0	0	0
phosphatidylcholine biosynthesis II	Group 1	0	0	0	0	0	0	0	0	0	0	0	0	0	0	0	0	0	0	0	0	0	0	0	0	0	0	0	0	0	0	0	0	0	0	0	0	0	0	0	0	0	0	0	0	0	0	0	0
phosphatidylcholine biosynthesis III	Group 1	0	0	0	0	0	0	0	0	0	0	0	0	0	0	0	0	0	0	0	0	0	0	0	0	0	0	0	0	0	0	0	0	0	0	0	0	0	0	0	0	0	0	0	0	0	0	0	0
phosphatidylcholine biosynthesis IV	Group 1	0	0	0	0	0	0	0	0	0	0	0	0	0	0	0	0	0	0	0	0	0	0	0	0	0	0	0	0	0	0	0	0	0	0	0	0	0	0	0	0	0	0	0	0	0	0	0	0
phosphatidylethanolamine biosynthesis II	Group 1	0	0	0	0	0	0	0	0	0	0	0	0	0	0	0	0	0	0	0	0	0	0	0	0	0	0	0	0	0	0	0	0	0	0	0	0	0	0	0	0	0	0	0	0	0	0	0	0
UDP-&alpha;-D-galacturonate biosynthesis II (from D-galacturonate)	Group 1	0	0	0	0	0	0	0	0	0	0	0	0	0	0	0	0	0	0	0	0	0	0	0	0	0	0	0	0	0	0	0	0	0	0	0	0	0	0	0	0	0	0	0	0	0	0	0	0
tetrahydroxyxanthone biosynthesis (from benzoate)	Group 1	0	0	0	0	0	0	0	0	0	0	0	0	0	0	0	0	0	0	0	0	0	0	0	0	0	0	0	0	0	0	0	0	0	0	0	0	0	0	0	0	0	0	0	0	0	0	0	0
tetrahydroxyxanthone biosynthesis (from 3-hydroxybenzoate)	Group 1	0	0	0	0	0	0	0	0	0	0	0	0	0	0	0	0	0	0	0	0	0	0	0	0	0	0	0	0	0	0	0	0	0	0	0	0	0	0	0	0	0	0	0	0	0	0	0	0
willardiine and isowillardiine biosynthesis	Group 1	0	0	0	0	0	0	0	0	0	0	0	0	0	0	0	0	0	0	0	0	0	0	0	0	0	0	0	0	0	0	0	0	0	0	0	0	0	0	0	0	0	0	0	0	0	0	0	0
4-aminobutanoate degradation V	Group 1	0	0	0	0	0	0	0	0	0	0	0	0	0	0	0	0	0	0	0	0	0	0	0	0	0	0	0	0	0	0	0	0	0	0	0	0	0	0	0	0	0	0	0	0	0	0	0	0
L-arginine degradation XI	Group 1	0	0	0	0	0	0	0	0	0	0	0	0	0	0	0	0	0	0	0	0	0	0	0	0	0	0	0	0	0	0	0	0	0	0	0	0	0	0	0	0	0	0	0	0	0	0	0	0
indole-3-acetate biosynthesis IV (bacteria)	Group 1	0	0	0	0	0	0	0	0	0	0	0	0	0	0	0	0	0	0	0	0	0	0	0	0	0	0	0	0	0	0	0	0	0	0	0	0	0	0	0	0	0	0	0	0	0	0	0	0
phylloquinol biosynthesis	Group 1	0	0	0	0	0	0	0	0	0	0	0	0	0	0	0	0	0	0	0	0	0	0	0	0	0	0	0	0	0	0	0	0	0	0	0	0	0	0	0	0	0	0	0	0	0	0	0	0
3-(imidazol-5-yl)lactate salvage	Group 1	0	0	0	0	0	0	0	0	0	0	0	0	0	0	0	0	0	0	0	0	0	0	0	0	0	0	0	0	0	0	0	0	0	0	0	0	0	0	0	0	0	0	0	0	0	0	0	0
L-histidine degradation III	Group 1	0	0	0	0	0	0	0	0	0	0	0	0	0	0	0	0	0	0	0	0	0	0	0	0	0	0	0	0	0	0	0	0	0	0	0	0	0	0	0	0	0	0	0	0	0	0	0	0
L-histidine degradation V	Group 1	0	0	0	0	0	0	0	0	0	0	0	0	0	0	0	0	0	0	0	0	0	0	0	0	0	0	0	0	0	0	0	0	0	0	0	0	0	0	0	0	0	0	0	0	0	0	0	0
ent-kaurene biosynthesis I	Group 1	0	0	0	0	0	0	0	0	0	0	0	0	0	0	0	0	0	0	0	0	0	0	0	0	0	0	0	0	0	0	0	0	0	0	0	0	0	0	0	0	0	0	0	0	0	0	0	0
nicotinate degradation II	Group 1	0	0	0	0	0	0	0	0	0	0	0	0	0	0	0	0	0	0	0	0	0	0	0	0	0	0	0	0	0	0	0	0	0	0	0	0	0	0	0	0	0	0	0	0	0	0	0	0
GA12 biosynthesis	Group 1	0	0	0	0	0	0	0	0	0	0	0	0	0	0	0	0	0	0	0	0	0	0	0	0	0	0	0	0	0	0	0	0	0	0	0	0	0	0	0	0	0	0	0	0	0	0	0	0
gibberellin biosynthesis III (early C-13 hydroxylation)	Group 1	0	0	0	0	0	0	0	0	0	0	0	0	0	0	0	0	0	0	0	0	0	0	0	0	0	0	0	0	0	0	0	0	0	0	0	0	0	0	0	0	0	0	0	0	0	0	0	0
gibberellin biosynthesis II (early C-3 hydroxylation)	Group 1	0	0	0	0	0	0	0	0	0	0	0	0	0	0	0	0	0	0	0	0	0	0	0	0	0	0	0	0	0	0	0	0	0	0	0	0	0	0	0	0	0	0	0	0	0	0	0	0
caffeine biosynthesis I	Group 1	0	0	0	0	0	0	0	0	0	0	0	0	0	0	0	0	0	0	0	0	0	0	0	0	0	0	0	0	0	0	0	0	0	0	0	0	0	0	0	0	0	0	0	0	0	0	0	0
caffeine biosynthesis II (via paraxanthine)	Group 1	0	0	0	0	0	0	0	0	0	0	0	0	0	0	0	0	0	0	0	0	0	0	0	0	0	0	0	0	0	0	0	0	0	0	0	0	0	0	0	0	0	0	0	0	0	0	0	0
theobromine biosynthesis I	Group 1	0	0	0	0	0	0	0	0	0	0	0	0	0	0	0	0	0	0	0	0	0	0	0	0	0	0	0	0	0	0	0	0	0	0	0	0	0	0	0	0	0	0	0	0	0	0	0	0
theobromine biosynthesis II (via xanthine)	Group 1	0	0	0	0	0	0	0	0	0	0	0	0	0	0	0	0	0	0	0	0	0	0	0	0	0	0	0	0	0	0	0	0	0	0	0	0	0	0	0	0	0	0	0	0	0	0	0	0
pinosylvin metabolism	Group 1	0	0	0	0	0	0	0	0	0	0	0	0	0	0	0	0	0	0	0	0	0	0	0	0	0	0	0	0	0	0	0	0	0	0	0	0	0	0	0	0	0	0	0	0	0	0	0	0
gibberellin biosynthesis IV (Gibberella fujikuroi)	Group 1	0	0	0	0	0	0	0	0	0	0	0	0	0	0	0	0	0	0	0	0	0	0	0	0	0	0	0	0	0	0	0	0	0	0	0	0	0	0	0	0	0	0	0	0	0	0	0	0
rosmarinic acid biosynthesis I	Group 1	0	0	0	0	0	0	0	0	0	0	0	0	0	0	0	0	0	0	0	0	0	0	0	0	0	0	0	0	0	0	0	0	0	0	0	0	0	0	0	0	0	0	0	0	0	0	0	0
rosmarinic acid biosynthesis II	Group 1	0	0	0	0	0	0	0	0	0	0	0	0	0	0	0	0	0	0	0	0	0	0	0	0	0	0	0	0	0	0	0	0	0	0	0	0	0	0	0	0	0	0	0	0	0	0	0	0
D-sorbitol biosynthesis I	Group 1	0	0	0	0	0	0	0	0	0	0	0	0	0	0	0	0	0	0	0	0	0	0	0	0	0	0	0	0	0	0	0	0	0	0	0	0	0	0	0	0	0	0	0	0	0	0	0	0
nicotinate degradation III	Group 1	0	0	0	0	0	0	0	0	0	0	0	0	0	0	0	0	0	0	0	0	0	0	0	0	0	0	0	0	0	0	0	0	0	0	0	0	0	0	0	0	0	0	0	0	0	0	0	0
pinobanksin biosynthesis	Group 1	0	0	0	0	0	0	0	0	0	0	0	0	0	0	0	0	0	0	0	0	0	0	0	0	0	0	0	0	0	0	0	0	0	0	0	0	0	0	0	0	0	0	0	0	0	0	0	0
luteolin biosynthesis	Group 1	0	0	0	0	0	0	0	0	0	0	0	0	0	0	0	0	0	0	0	0	0	0	0	0	0	0	0	0	0	0	0	0	0	0	0	0	0	0	0	0	0	0	0	0	0	0	0	0
6,7,4'-trihydroxyisoflavone biosynthesis	Group 1	0	0	0	0	0	0	0	0	0	0	0	0	0	0	0	0	0	0	0	0	0	0	0	0	0	0	0	0	0	0	0	0	0	0	0	0	0	0	0	0	0	0	0	0	0	0	0	0
phytyl diphosphate biosynthesis	Group 1	0	0	0	0	0	0	0	0	0	0	0	0	0	0	0	0	0	0	0	0	0	0	0	0	0	0	0	0	0	0	0	0	0	0	0	0	0	0	0	0	0	0	0	0	0	0	0	0
chlorophyll a biosynthesis II	Group 1	0	0	0	0	0	0	0	0	0	0	0	0	0	0	0	0	0	0	0	0	0	0	0	0	0	0	0	0	0	0	0	0	0	0	0	0	0	0	0	0	0	0	0	0	0	0	0	0
glycogen biosynthesis II (from UDP-D-Glucose)	Group 1	0	0	0	0	0	0	0	0	0	0	0	0	0	0	0	0	0	0	0	0	0	0	0	0	0	0	0	0	0	0	0	0	0	0	0	0	0	0	0	0	0	0	0	0	0	0	0	0
chlorophyll cycle	Group 1	0	0	0	0	0	0	0	0	0	0	0	0	0	0	0	0	0	0	0	0	0	0	0	0	0	0	0	0	0	0	0	0	0	0	0	0	0	0	0	0	0	0	0	0	0	0	0	0
gibberellin biosynthesis I (non C-3, non C-13 hydroxylation)	Group 1	0	0	0	0	0	0	0	0	0	0	0	0	0	0	0	0	0	0	0	0	0	0	0	0	0	0	0	0	0	0	0	0	0	0	0	0	0	0	0	0	0	0	0	0	0	0	0	0
L-leucine degradation II	Group 1	0	0	0	0	0	0	0	0	0	0	0	0	0	0	0	0	0	0	0	0	0	0	0	0	0	0	0	0	0	0	0	0	0	0	0	0	0	0	0	0	0	0	0	0	0	0	0	0
very long chain fatty acid biosynthesis I	Group 1	0	0	0	0	0	0	0	0	0	0	0	0	0	0	0	0	0	0	0	0	0	0	0	0	0	0	0	0	0	0	0	0	0	0	0	0	0	0	0	0	0	0	0	0	0	0	0	0
L-tryptophan degradation VIII (to tryptophol)	Group 1	0	0	0	0	0	0	0	0	0	0	0	0	0	0	0	0	0	0	0	0	0	0	0	0	0	0	0	0	0	0	0	0	0	0	0	0	0	0	0	0	0	0	0	0	0	0	0	0
L-methionine degradation III	Group 1	0	0	0	0	0	0	0	0	0	0	0	0	0	0	0	0	0	0	0	0	0	0	0	0	0	0	0	0	0	0	0	0	0	0	0	0	0	0	0	0	0	0	0	0	0	0	0	0
chlorophyll a biosynthesis I	Group 1	0	0	0	0	0	0	0	0	0	0	0	0	0	0	0	0	0	0	0	0	0	0	0	0	0	0	0	0	0	0	0	0	0	0	0	0	0	0	0	0	0	0	0	0	0	0	0	0
L-glutamate degradation VI (to pyruvate)	Group 1	0	0	0	0	0	0	0	0	0	0	0	0	0	0	0	0	0	0	0	0	0	0	0	0	0	0	0	0	0	0	0	0	0	0	0	0	0	0	0	0	0	0	0	0	0	0	0	0
naringenin glycoside biosynthesis	Group 1	0	0	0	0	0	0	0	0	0	0	0	0	0	0	0	0	0	0	0	0	0	0	0	0	0	0	0	0	0	0	0	0	0	0	0	0	0	0	0	0	0	0	0	0	0	0	0	0
chlorophyll a degradation I	Group 1	0	0	0	0	0	0	0	0	0	0	0	0	0	0	0	0	0	0	0	0	0	0	0	0	0	0	0	0	0	0	0	0	0	0	0	0	0	0	0	0	0	0	0	0	0	0	0	0
L-isoleucine biosynthesis IV	Group 1	0	0	0	0	0	0	0	0	0	0	0	0	0	0	0	0	0	0	0	0	0	0	0	0	0	0	0	0	0	0	0	0	0	0	0	0	0	0	0	0	0	0	0	0	0	0	0	0
hesperitin glycoside biosynthesis	Group 1	0	0	0	0	0	0	0	0	0	0	0	0	0	0	0	0	0	0	0	0	0	0	0	0	0	0	0	0	0	0	0	0	0	0	0	0	0	0	0	0	0	0	0	0	0	0	0	0
phytol salvage pathway	Group 1	0	0	0	0	0	0	0	0	0	0	0	0	0	0	0	0	0	0	0	0	0	0	0	0	0	0	0	0	0	0	0	0	0	0	0	0	0	0	0	0	0	0	0	0	0	0	0	0
L-isoleucine biosynthesis V	Group 1	0	0	0	0	0	0	0	0	0	0	0	0	0	0	0	0	0	0	0	0	0	0	0	0	0	0	0	0	0	0	0	0	0	0	0	0	0	0	0	0	0	0	0	0	0	0	0	0
trigonelline biosynthesis	Group 1	0	0	0	0	0	0	0	0	0	0	0	0	0	0	0	0	0	0	0	0	0	0	0	0	0	0	0	0	0	0	0	0	0	0	0	0	0	0	0	0	0	0	0	0	0	0	0	0
UDP-D-apiose biosynthesis (from UDP-D-glucuronate)	Group 1	0	0	0	0	0	0	0	0	0	0	0	0	0	0	0	0	0	0	0	0	0	0	0	0	0	0	0	0	0	0	0	0	0	0	0	0	0	0	0	0	0	0	0	0	0	0	0	0
GDP-L-galactose biosynthesis	Group 1	0	0	0	0	0	0	0	0	0	0	0	0	0	0	0	0	0	0	0	0	0	0	0	0	0	0	0	0	0	0	0	0	0	0	0	0	0	0	0	0	0	0	0	0	0	0	0	0
sakuranetin biosynthesis	Group 1	0	0	0	0	0	0	0	0	0	0	0	0	0	0	0	0	0	0	0	0	0	0	0	0	0	0	0	0	0	0	0	0	0	0	0	0	0	0	0	0	0	0	0	0	0	0	0	0
ponciretin biosynthesis	Group 1	0	0	0	0	0	0	0	0	0	0	0	0	0	0	0	0	0	0	0	0	0	0	0	0	0	0	0	0	0	0	0	0	0	0	0	0	0	0	0	0	0	0	0	0	0	0	0	0
acacetin biosynthesis	Group 1	0	0	0	0	0	0	0	0	0	0	0	0	0	0	0	0	0	0	0	0	0	0	0	0	0	0	0	0	0	0	0	0	0	0	0	0	0	0	0	0	0	0	0	0	0	0	0	0
anthocyanin biosynthesis	Group 1	0	0	0	0	0	0	0	0	0	0	0	0	0	0	0	0	0	0	0	0	0	0	0	0	0	0	0	0	0	0	0	0	0	0	0	0	0	0	0	0	0	0	0	0	0	0	0	0
sphingolipid biosynthesis (plants)	Group 1	0	0	0	0	0	0	0	0	0	0	0	0	0	0	0	0	0	0	0	0	0	0	0	0	0	0	0	0	0	0	0	0	0	0	0	0	0	0	0	0	0	0	0	0	0	0	0	0
lupulone and humulone biosynthesis	Group 1	0	0	0	0	0	0	0	0	0	0	0	0	0	0	0	0	0	0	0	0	0	0	0	0	0	0	0	0	0	0	0	0	0	0	0	0	0	0	0	0	0	0	0	0	0	0	0	0
colupulone and cohumulone biosynthesis	Group 1	0	0	0	0	0	0	0	0	0	0	0	0	0	0	0	0	0	0	0	0	0	0	0	0	0	0	0	0	0	0	0	0	0	0	0	0	0	0	0	0	0	0	0	0	0	0	0	0
xanthohumol biosynthesis	Group 1	0	0	0	0	0	0	0	0	0	0	0	0	0	0	0	0	0	0	0	0	0	0	0	0	0	0	0	0	0	0	0	0	0	0	0	0	0	0	0	0	0	0	0	0	0	0	0	0
pelargonidin conjugates biosynthesis	Group 1	0	0	0	0	0	0	0	0	0	0	0	0	0	0	0	0	0	0	0	0	0	0	0	0	0	0	0	0	0	0	0	0	0	0	0	0	0	0	0	0	0	0	0	0	0	0	0	0
cannabinoid biosynthesis	Group 1	0	0	0	0	0	0	0	0	0	0	0	0	0	0	0	0	0	0	0	0	0	0	0	0	0	0	0	0	0	0	0	0	0	0	0	0	0	0	0	0	0	0	0	0	0	0	0	0
oleate biosynthesis I (plants)	Group 1	0	0	0	0	0	0	0	0	0	0	0	0	0	0	0	0	0	0	0	0	0	0	0	0	0	0	0	0	0	0	0	0	0	0	0	0	0	0	0	0	0	0	0	0	0	0	0	0
L-tyrosine degradation II	Group 1	0	0	0	0	0	0	0	0	0	0	0	0	0	0	0	0	0	0	0	0	0	0	0	0	0	0	0	0	0	0	0	0	0	0	0	0	0	0	0	0	0	0	0	0	0	0	0	0
leucodelphinidin biosynthesis	Group 1	0	0	0	0	0	0	0	0	0	0	0	0	0	0	0	0	0	0	0	0	0	0	0	0	0	0	0	0	0	0	0	0	0	0	0	0	0	0	0	0	0	0	0	0	0	0	0	0
anthocyanin biosynthesis (delphinidin 3-O-glucoside)	Group 1	0	0	0	0	0	0	0	0	0	0	0	0	0	0	0	0	0	0	0	0	0	0	0	0	0	0	0	0	0	0	0	0	0	0	0	0	0	0	0	0	0	0	0	0	0	0	0	0
rose anthocyanin biosynthesis I (via cyanidin 5-O-beta-D-glucoside)	Group 1	0	0	0	0	0	0	0	0	0	0	0	0	0	0	0	0	0	0	0	0	0	0	0	0	0	0	0	0	0	0	0	0	0	0	0	0	0	0	0	0	0	0	0	0	0	0	0	0
6'-deoxychalcone metabolism	Group 1	0	0	0	0	0	0	0	0	0	0	0	0	0	0	0	0	0	0	0	0	0	0	0	0	0	0	0	0	0	0	0	0	0	0	0	0	0	0	0	0	0	0	0	0	0	0	0	0
p-cumate degradation to 2-hydroxypentadienoate	Group 1	0	0	0	0	0	0	0	0	0	0	0	0	0	0	0	0	0	0	0	0	0	0	0	0	0	0	0	0	0	0	0	0	0	0	0	0	0	0	0	0	0	0	0	0	0	0	0	0
4-toluenesulfonate degradation II	Group 1	0	0	0	0	0	0	0	0	0	0	0	0	0	0	0	0	0	0	0	0	0	0	0	0	0	0	0	0	0	0	0	0	0	0	0	0	0	0	0	0	0	0	0	0	0	0	0	0
ferulate and sinapate biosynthesis	Group 1	0	0	0	0	0	0	0	0	0	0	0	0	0	0	0	0	0	0	0	0	0	0	0	0	0	0	0	0	0	0	0	0	0	0	0	0	0	0	0	0	0	0	0	0	0	0	0	0
cyanuric acid degradation II	Group 1	0	0	0	0	0	0	0	0	0	0	0	0	0	0	0	0	0	0	0	0	0	0	0	0	0	0	0	0	0	0	0	0	0	0	0	0	0	0	0	0	0	0	0	0	0	0	0	0
melamine degradation	Group 1	0	0	0	0	0	0	0	0	0	0	0	0	0	0	0	0	0	0	0	0	0	0	0	0	0	0	0	0	0	0	0	0	0	0	0	0	0	0	0	0	0	0	0	0	0	0	0	0
N-cyclopropylmelamine degradation	Group 1	0	0	0	0	0	0	0	0	0	0	0	0	0	0	0	0	0	0	0	0	0	0	0	0	0	0	0	0	0	0	0	0	0	0	0	0	0	0	0	0	0	0	0	0	0	0	0	0
acetyl-CoA biosynthesis from citrate	Group 1	0	0	0	0	0	0	0	0	0	0	0	0	0	0	0	0	0	0	0	0	0	0	0	0	0	0	0	0	0	0	0	0	0	0	0	0	0	0	0	0	0	0	0	0	0	0	0	0
capsanthin and capsorubin biosynthesis	Group 1	0	0	0	0	0	0	0	0	0	0	0	0	0	0	0	0	0	0	0	0	0	0	0	0	0	0	0	0	0	0	0	0	0	0	0	0	0	0	0	0	0	0	0	0	0	0	0	0
lactucaxanthin biosynthesis	Group 1	0	0	0	0	0	0	0	0	0	0	0	0	0	0	0	0	0	0	0	0	0	0	0	0	0	0	0	0	0	0	0	0	0	0	0	0	0	0	0	0	0	0	0	0	0	0	0	0
coumarin biosynthesis (via 2-coumarate)	Group 1	0	0	0	0	0	0	0	0	0	0	0	0	0	0	0	0	0	0	0	0	0	0	0	0	0	0	0	0	0	0	0	0	0	0	0	0	0	0	0	0	0	0	0	0	0	0	0	0
artemisinin and arteannuin B biosynthesis	Group 1	0	0	0	0	0	0	0	0	0	0	0	0	0	0	0	0	0	0	0	0	0	0	0	0	0	0	0	0	0	0	0	0	0	0	0	0	0	0	0	0	0	0	0	0	0	0	0	0
factor 430 biosynthesis	Group 1	0	0	0	0	0	0	0	0	0	0	0	0	0	0	0	0	0	0	0	0	0	0	0	0	0	0	0	0	0	0	0	0	0	0	0	0	0	0	0	0	0	0	0	0	0	0	0	0
lactate biosynthesis (archaea)	Group 1	0	0	0	0	0	0	0	0	0	0	0	0	0	0	0	0	0	0	0	0	0	0	0	0	0	0	0	0	0	0	0	0	0	0	0	0	0	0	0	0	0	0	0	0	0	0	0	0
factor 420 biosynthesis II (mycobacteria)	Group 1	0	0	0	0	0	0	0	0	0	0	0	0	0	0	0	0	0	0	0	0	0	0	0	0	0	0	0	0	0	0	0	0	0	0	0	0	0	0	0	0	0	0	0	0	0	0	0	0
factor 420 polyglutamylation	Group 1	0	0	0	0	0	0	0	0	0	0	0	0	0	0	0	0	0	0	0	0	0	0	0	0	0	0	0	0	0	0	0	0	0	0	0	0	0	0	0	0	0	0	0	0	0	0	0	0
soybean saponin I biosynthesis	Group 1	0	0	0	0	0	0	0	0	0	0	0	0	0	0	0	0	0	0	0	0	0	0	0	0	0	0	0	0	0	0	0	0	0	0	0	0	0	0	0	0	0	0	0	0	0	0	0	0
coenzyme B/coenzyme M regeneration I (methanophenazine-dependent)	Group 1	0	0	0	0	0	0	0	0	0	0	0	0	0	0	0	0	0	0	0	0	0	0	0	0	0	0	0	0	0	0	0	0	0	0	0	0	0	0	0	0	0	0	0	0	0	0	0	0
methyl-coenzyme M oxidation to CO2	Group 1	0	0	0	0	0	0	0	0	0	0	0	0	0	0	0	0	0	0	0	0	0	0	0	0	0	0	0	0	0	0	0	0	0	0	0	0	0	0	0	0	0	0	0	0	0	0	0	0
methanogenesis from methylamine	Group 1	0	0	0	0	0	0	0	0	0	0	0	0	0	0	0	0	0	0	0	0	0	0	0	0	0	0	0	0	0	0	0	0	0	0	0	0	0	0	0	0	0	0	0	0	0	0	0	0
methanogenesis from dimethylamine	Group 1	0	0	0	0	0	0	0	0	0	0	0	0	0	0	0	0	0	0	0	0	0	0	0	0	0	0	0	0	0	0	0	0	0	0	0	0	0	0	0	0	0	0	0	0	0	0	0	0
methanogenesis from trimethylamine	Group 1	0	0	0	0	0	0	0	0	0	0	0	0	0	0	0	0	0	0	0	0	0	0	0	0	0	0	0	0	0	0	0	0	0	0	0	0	0	0	0	0	0	0	0	0	0	0	0	0
methanofuran biosynthesis	Group 1	0	0	0	0	0	0	0	0	0	0	0	0	0	0	0	0	0	0	0	0	0	0	0	0	0	0	0	0	0	0	0	0	0	0	0	0	0	0	0	0	0	0	0	0	0	0	0	0
methanogenesis from dimethylsulfide	Group 1	0	0	0	0	0	0	0	0	0	0	0	0	0	0	0	0	0	0	0	0	0	0	0	0	0	0	0	0	0	0	0	0	0	0	0	0	0	0	0	0	0	0	0	0	0	0	0	0
methanogenesis from methanethiol	Group 1	0	0	0	0	0	0	0	0	0	0	0	0	0	0	0	0	0	0	0	0	0	0	0	0	0	0	0	0	0	0	0	0	0	0	0	0	0	0	0	0	0	0	0	0	0	0	0	0
methanogenesis from methylthiopropanoate	Group 1	0	0	0	0	0	0	0	0	0	0	0	0	0	0	0	0	0	0	0	0	0	0	0	0	0	0	0	0	0	0	0	0	0	0	0	0	0	0	0	0	0	0	0	0	0	0	0	0
methanogenesis from tetramethylammonium	Group 1	0	0	0	0	0	0	0	0	0	0	0	0	0	0	0	0	0	0	0	0	0	0	0	0	0	0	0	0	0	0	0	0	0	0	0	0	0	0	0	0	0	0	0	0	0	0	0	0
glucosinolate activation	Group 1	0	0	0	0	0	0	0	0	0	0	0	0	0	0	0	0	0	0	0	0	0	0	0	0	0	0	0	0	0	0	0	0	0	0	0	0	0	0	0	0	0	0	0	0	0	0	0	0
salvianin biosynthesis	Group 1	0	0	0	0	0	0	0	0	0	0	0	0	0	0	0	0	0	0	0	0	0	0	0	0	0	0	0	0	0	0	0	0	0	0	0	0	0	0	0	0	0	0	0	0	0	0	0	0
cardiolipin biosynthesis II	Group 1	0	0	0	0	0	0	0	0	0	0	0	0	0	0	0	0	0	0	0	0	0	0	0	0	0	0	0	0	0	0	0	0	0	0	0	0	0	0	0	0	0	0	0	0	0	0	0	0
morphine biosynthesis	Group 1	0	0	0	0	0	0	0	0	0	0	0	0	0	0	0	0	0	0	0	0	0	0	0	0	0	0	0	0	0	0	0	0	0	0	0	0	0	0	0	0	0	0	0	0	0	0	0	0
abscisic acid degradation to phaseic acid	Group 1	0	0	0	0	0	0	0	0	0	0	0	0	0	0	0	0	0	0	0	0	0	0	0	0	0	0	0	0	0	0	0	0	0	0	0	0	0	0	0	0	0	0	0	0	0	0	0	0
abscisic acid degradation by glucosylation	Group 1	0	0	0	0	0	0	0	0	0	0	0	0	0	0	0	0	0	0	0	0	0	0	0	0	0	0	0	0	0	0	0	0	0	0	0	0	0	0	0	0	0	0	0	0	0	0	0	0
thiosulfate disproportionation I (thiol-dependent)	Group 1	0	0	0	0	0	0	0	0	0	0	0	0	0	0	0	0	0	0	0	0	0	0	0	0	0	0	0	0	0	0	0	0	0	0	0	0	0	0	0	0	0	0	0	0	0	0	0	0
sulfite oxidation III	Group 1	0	0	0	0	0	0	0	0	0	0	0	0	0	0	0	0	0	0	0	0	0	0	0	0	0	0	0	0	0	0	0	0	0	0	0	0	0	0	0	0	0	0	0	0	0	0	0	0
sulfite oxidation II	Group 1	0	0	0	0	0	0	0	0	0	0	0	0	0	0	0	0	0	0	0	0	0	0	0	0	0	0	0	0	0	0	0	0	0	0	0	0	0	0	0	0	0	0	0	0	0	0	0	0
shisonin biosynthesis	Group 1	0	0	0	0	0	0	0	0	0	0	0	0	0	0	0	0	0	0	0	0	0	0	0	0	0	0	0	0	0	0	0	0	0	0	0	0	0	0	0	0	0	0	0	0	0	0	0	0
anthocyanidin sophoroside metabolism	Group 1	0	0	0	0	0	0	0	0	0	0	0	0	0	0	0	0	0	0	0	0	0	0	0	0	0	0	0	0	0	0	0	0	0	0	0	0	0	0	0	0	0	0	0	0	0	0	0	0
sanguinarine and macarpine biosynthesis	Group 1	0	0	0	0	0	0	0	0	0	0	0	0	0	0	0	0	0	0	0	0	0	0	0	0	0	0	0	0	0	0	0	0	0	0	0	0	0	0	0	0	0	0	0	0	0	0	0	0
astaxanthin biosynthesis (bacteria, fungi, algae)	Group 1	0	0	0	0	0	0	0	0	0	0	0	0	0	0	0	0	0	0	0	0	0	0	0	0	0	0	0	0	0	0	0	0	0	0	0	0	0	0	0	0	0	0	0	0	0	0	0	0
secologanin and strictosidine biosynthesis	Group 1	0	0	0	0	0	0	0	0	0	0	0	0	0	0	0	0	0	0	0	0	0	0	0	0	0	0	0	0	0	0	0	0	0	0	0	0	0	0	0	0	0	0	0	0	0	0	0	0
canthaxanthin biosynthesis	Group 1	0	0	0	0	0	0	0	0	0	0	0	0	0	0	0	0	0	0	0	0	0	0	0	0	0	0	0	0	0	0	0	0	0	0	0	0	0	0	0	0	0	0	0	0	0	0	0	0
vindoline, vindorosine and vinblastine biosynthesis	Group 1	0	0	0	0	0	0	0	0	0	0	0	0	0	0	0	0	0	0	0	0	0	0	0	0	0	0	0	0	0	0	0	0	0	0	0	0	0	0	0	0	0	0	0	0	0	0	0	0
ternatin C5 biosynthesis	Group 1	0	0	0	0	0	0	0	0	0	0	0	0	0	0	0	0	0	0	0	0	0	0	0	0	0	0	0	0	0	0	0	0	0	0	0	0	0	0	0	0	0	0	0	0	0	0	0	0
siroheme amide biosynthesis	Group 1	0	0	0	0	0	0	0	0	0	0	0	0	0	0	0	0	0	0	0	0	0	0	0	0	0	0	0	0	0	0	0	0	0	0	0	0	0	0	0	0	0	0	0	0	0	0	0	0
ajmaline and sarpagine biosynthesis	Group 1	0	0	0	0	0	0	0	0	0	0	0	0	0	0	0	0	0	0	0	0	0	0	0	0	0	0	0	0	0	0	0	0	0	0	0	0	0	0	0	0	0	0	0	0	0	0	0	0
sulfur disproportionation II (aerobic)	Group 1	0	0	0	0	0	0	0	0	0	0	0	0	0	0	0	0	0	0	0	0	0	0	0	0	0	0	0	0	0	0	0	0	0	0	0	0	0	0	0	0	0	0	0	0	0	0	0	0
thiosulfate oxidation II (via tetrathionate)	Group 1	0	0	0	0	0	0	0	0	0	0	0	0	0	0	0	0	0	0	0	0	0	0	0	0	0	0	0	0	0	0	0	0	0	0	0	0	0	0	0	0	0	0	0	0	0	0	0	0
bixin biosynthesis	Group 1	0	0	0	0	0	0	0	0	0	0	0	0	0	0	0	0	0	0	0	0	0	0	0	0	0	0	0	0	0	0	0	0	0	0	0	0	0	0	0	0	0	0	0	0	0	0	0	0
gentiodelphin biosynthesis	Group 1	0	0	0	0	0	0	0	0	0	0	0	0	0	0	0	0	0	0	0	0	0	0	0	0	0	0	0	0	0	0	0	0	0	0	0	0	0	0	0	0	0	0	0	0	0	0	0	0
L-lysine degradation VII	Group 1	0	0	0	0	0	0	0	0	0	0	0	0	0	0	0	0	0	0	0	0	0	0	0	0	0	0	0	0	0	0	0	0	0	0	0	0	0	0	0	0	0	0	0	0	0	0	0	0
N-methyl-&Delta;1-pyrrolinium cation biosynthesis	Group 1	0	0	0	0	0	0	0	0	0	0	0	0	0	0	0	0	0	0	0	0	0	0	0	0	0	0	0	0	0	0	0	0	0	0	0	0	0	0	0	0	0	0	0	0	0	0	0	0
nicotine biosynthesis	Group 1	0	0	0	0	0	0	0	0	0	0	0	0	0	0	0	0	0	0	0	0	0	0	0	0	0	0	0	0	0	0	0	0	0	0	0	0	0	0	0	0	0	0	0	0	0	0	0	0
hyoscyamine and scopolamine biosynthesis	Group 1	0	0	0	0	0	0	0	0	0	0	0	0	0	0	0	0	0	0	0	0	0	0	0	0	0	0	0	0	0	0	0	0	0	0	0	0	0	0	0	0	0	0	0	0	0	0	0	0
calystegine biosynthesis	Group 1	0	0	0	0	0	0	0	0	0	0	0	0	0	0	0	0	0	0	0	0	0	0	0	0	0	0	0	0	0	0	0	0	0	0	0	0	0	0	0	0	0	0	0	0	0	0	0	0
coumarin metabolism (to melilotic acid)	Group 1	0	0	0	0	0	0	0	0	0	0	0	0	0	0	0	0	0	0	0	0	0	0	0	0	0	0	0	0	0	0	0	0	0	0	0	0	0	0	0	0	0	0	0	0	0	0	0	0
kaempferol glycoside biosynthesis (Arabidopsis)	Group 1	0	0	0	0	0	0	0	0	0	0	0	0	0	0	0	0	0	0	0	0	0	0	0	0	0	0	0	0	0	0	0	0	0	0	0	0	0	0	0	0	0	0	0	0	0	0	0	0
quercetin glycoside biosynthesis (Arabidopsis)	Group 1	0	0	0	0	0	0	0	0	0	0	0	0	0	0	0	0	0	0	0	0	0	0	0	0	0	0	0	0	0	0	0	0	0	0	0	0	0	0	0	0	0	0	0	0	0	0	0	0
L-lysine degradation IX	Group 1	0	0	0	0	0	0	0	0	0	0	0	0	0	0	0	0	0	0	0	0	0	0	0	0	0	0	0	0	0	0	0	0	0	0	0	0	0	0	0	0	0	0	0	0	0	0	0	0
sulfite oxidation IV (sulfite oxidase)	Group 1	0	0	0	0	0	0	0	0	0	0	0	0	0	0	0	0	0	0	0	0	0	0	0	0	0	0	0	0	0	0	0	0	0	0	0	0	0	0	0	0	0	0	0	0	0	0	0	0
taurine biosynthesis I	Group 1	0	0	0	0	0	0	0	0	0	0	0	0	0	0	0	0	0	0	0	0	0	0	0	0	0	0	0	0	0	0	0	0	0	0	0	0	0	0	0	0	0	0	0	0	0	0	0	0
sulfur reduction I	Group 1	0	0	0	0	0	0	0	0	0	0	0	0	0	0	0	0	0	0	0	0	0	0	0	0	0	0	0	0	0	0	0	0	0	0	0	0	0	0	0	0	0	0	0	0	0	0	0	0
carbon disulfide oxidation II (aerobic)	Group 1	0	0	0	0	0	0	0	0	0	0	0	0	0	0	0	0	0	0	0	0	0	0	0	0	0	0	0	0	0	0	0	0	0	0	0	0	0	0	0	0	0	0	0	0	0	0	0	0
stachyose biosynthesis	Group 1	0	0	0	0	0	0	0	0	0	0	0	0	0	0	0	0	0	0	0	0	0	0	0	0	0	0	0	0	0	0	0	0	0	0	0	0	0	0	0	0	0	0	0	0	0	0	0	0
galactosylcyclitol biosynthesis	Group 1	0	0	0	0	0	0	0	0	0	0	0	0	0	0	0	0	0	0	0	0	0	0	0	0	0	0	0	0	0	0	0	0	0	0	0	0	0	0	0	0	0	0	0	0	0	0	0	0
chalcone 2'-O-glucoside biosynthesis	Group 1	0	0	0	0	0	0	0	0	0	0	0	0	0	0	0	0	0	0	0	0	0	0	0	0	0	0	0	0	0	0	0	0	0	0	0	0	0	0	0	0	0	0	0	0	0	0	0	0
ajugose biosynthesis I (galactinol-dependent)	Group 1	0	0	0	0	0	0	0	0	0	0	0	0	0	0	0	0	0	0	0	0	0	0	0	0	0	0	0	0	0	0	0	0	0	0	0	0	0	0	0	0	0	0	0	0	0	0	0	0
ajugose biosynthesis II (galactinol-independent)	Group 1	0	0	0	0	0	0	0	0	0	0	0	0	0	0	0	0	0	0	0	0	0	0	0	0	0	0	0	0	0	0	0	0	0	0	0	0	0	0	0	0	0	0	0	0	0	0	0	0
kaempferol triglucoside biosynthesis	Group 1	0	0	0	0	0	0	0	0	0	0	0	0	0	0	0	0	0	0	0	0	0	0	0	0	0	0	0	0	0	0	0	0	0	0	0	0	0	0	0	0	0	0	0	0	0	0	0	0
esculetin biosynthesis	Group 1	0	0	0	0	0	0	0	0	0	0	0	0	0	0	0	0	0	0	0	0	0	0	0	0	0	0	0	0	0	0	0	0	0	0	0	0	0	0	0	0	0	0	0	0	0	0	0	0
arachidonate biosynthesis I (6-desaturase, lower eukaryotes)	Group 1	0	0	0	0	0	0	0	0	0	0	0	0	0	0	0	0	0	0	0	0	0	0	0	0	0	0	0	0	0	0	0	0	0	0	0	0	0	0	0	0	0	0	0	0	0	0	0	0
tetrathionate reduction I (to thiosulfate)	Group 1	0	0	0	0	0	0	0	0	0	0	0	0	0	0	0	0	0	0	0	0	0	0	0	0	0	0	0	0	0	0	0	0	0	0	0	0	0	0	0	0	0	0	0	0	0	0	0	0
tetrathionate reductiuon II (to trithionate)	Group 1	0	0	0	0	0	0	0	0	0	0	0	0	0	0	0	0	0	0	0	0	0	0	0	0	0	0	0	0	0	0	0	0	0	0	0	0	0	0	0	0	0	0	0	0	0	0	0	0
(5Z)-icosenoate biosynthesis	Group 1	0	0	0	0	0	0	0	0	0	0	0	0	0	0	0	0	0	0	0	0	0	0	0	0	0	0	0	0	0	0	0	0	0	0	0	0	0	0	0	0	0	0	0	0	0	0	0	0
sapienate biosynthesis	Group 1	0	0	0	0	0	0	0	0	0	0	0	0	0	0	0	0	0	0	0	0	0	0	0	0	0	0	0	0	0	0	0	0	0	0	0	0	0	0	0	0	0	0	0	0	0	0	0	0
chrysin biosynthesis	Group 1	0	0	0	0	0	0	0	0	0	0	0	0	0	0	0	0	0	0	0	0	0	0	0	0	0	0	0	0	0	0	0	0	0	0	0	0	0	0	0	0	0	0	0	0	0	0	0	0
sulfur reduction II (via polysulfide)	Group 1	0	0	0	0	0	0	0	0	0	0	0	0	0	0	0	0	0	0	0	0	0	0	0	0	0	0	0	0	0	0	0	0	0	0	0	0	0	0	0	0	0	0	0	0	0	0	0	0
linear furanocoumarin biosynthesis	Group 1	0	0	0	0	0	0	0	0	0	0	0	0	0	0	0	0	0	0	0	0	0	0	0	0	0	0	0	0	0	0	0	0	0	0	0	0	0	0	0	0	0	0	0	0	0	0	0	0
palmitoleate biosynthesis II (plants and bacteria)	Group 1	0	0	0	0	0	0	0	0	0	0	0	0	0	0	0	0	0	0	0	0	0	0	0	0	0	0	0	0	0	0	0	0	0	0	0	0	0	0	0	0	0	0	0	0	0	0	0	0
petroselinate biosynthesis	Group 1	0	0	0	0	0	0	0	0	0	0	0	0	0	0	0	0	0	0	0	0	0	0	0	0	0	0	0	0	0	0	0	0	0	0	0	0	0	0	0	0	0	0	0	0	0	0	0	0
dimorphecolate biosynthesis	Group 1	0	0	0	0	0	0	0	0	0	0	0	0	0	0	0	0	0	0	0	0	0	0	0	0	0	0	0	0	0	0	0	0	0	0	0	0	0	0	0	0	0	0	0	0	0	0	0	0
carbon tetrachloride degradation I	Group 1	0	0	0	0	0	0	0	0	0	0	0	0	0	0	0	0	0	0	0	0	0	0	0	0	0	0	0	0	0	0	0	0	0	0	0	0	0	0	0	0	0	0	0	0	0	0	0	0
carbon tetrachloride degradation II	Group 1	0	0	0	0	0	0	0	0	0	0	0	0	0	0	0	0	0	0	0	0	0	0	0	0	0	0	0	0	0	0	0	0	0	0	0	0	0	0	0	0	0	0	0	0	0	0	0	0
calendate biosynthesis	Group 1	0	0	0	0	0	0	0	0	0	0	0	0	0	0	0	0	0	0	0	0	0	0	0	0	0	0	0	0	0	0	0	0	0	0	0	0	0	0	0	0	0	0	0	0	0	0	0	0
punicate biosynthesis	Group 1	0	0	0	0	0	0	0	0	0	0	0	0	0	0	0	0	0	0	0	0	0	0	0	0	0	0	0	0	0	0	0	0	0	0	0	0	0	0	0	0	0	0	0	0	0	0	0	0
&alpha;-eleostearate biosynthesis	Group 1	0	0	0	0	0	0	0	0	0	0	0	0	0	0	0	0	0	0	0	0	0	0	0	0	0	0	0	0	0	0	0	0	0	0	0	0	0	0	0	0	0	0	0	0	0	0	0	0
&alpha;-amyrin biosynthesis	Group 1	0	0	0	0	0	0	0	0	0	0	0	0	0	0	0	0	0	0	0	0	0	0	0	0	0	0	0	0	0	0	0	0	0	0	0	0	0	0	0	0	0	0	0	0	0	0	0	0
B series fagopyritols biosynthesis	Group 1	0	0	0	0	0	0	0	0	0	0	0	0	0	0	0	0	0	0	0	0	0	0	0	0	0	0	0	0	0	0	0	0	0	0	0	0	0	0	0	0	0	0	0	0	0	0	0	0
A series fagopyritols biosynthesis	Group 1	0	0	0	0	0	0	0	0	0	0	0	0	0	0	0	0	0	0	0	0	0	0	0	0	0	0	0	0	0	0	0	0	0	0	0	0	0	0	0	0	0	0	0	0	0	0	0	0
sucrose degradation IV (sucrose phosphorylase)	Group 1	0	0	0	0	0	0	0	0	0	0	0	0	0	0	0	0	0	0	0	0	0	0	0	0	0	0	0	0	0	0	0	0	0	0	0	0	0	0	0	0	0	0	0	0	0	0	0	0
N-glucosylnicotinate metabolism	Group 1	0	0	0	0	0	0	0	0	0	0	0	0	0	0	0	0	0	0	0	0	0	0	0	0	0	0	0	0	0	0	0	0	0	0	0	0	0	0	0	0	0	0	0	0	0	0	0	0
rutin biosynthesis	Group 1	0	0	0	0	0	0	0	0	0	0	0	0	0	0	0	0	0	0	0	0	0	0	0	0	0	0	0	0	0	0	0	0	0	0	0	0	0	0	0	0	0	0	0	0	0	0	0	0
syringetin biosynthesis	Group 1	0	0	0	0	0	0	0	0	0	0	0	0	0	0	0	0	0	0	0	0	0	0	0	0	0	0	0	0	0	0	0	0	0	0	0	0	0	0	0	0	0	0	0	0	0	0	0	0
reductive TCA cycle II	Group 1	0	0	0	0	0	0	0	0	0	0	0	0	0	0	0	0	0	0	0	0	0	0	0	0	0	0	0	0	0	0	0	0	0	0	0	0	0	0	0	0	0	0	0	0	0	0	0	0
raspberry ketone biosynthesis	Group 1	0	0	0	0	0	0	0	0	0	0	0	0	0	0	0	0	0	0	0	0	0	0	0	0	0	0	0	0	0	0	0	0	0	0	0	0	0	0	0	0	0	0	0	0	0	0	0	0
betalamic acid biosynthesis	Group 1	0	0	0	0	0	0	0	0	0	0	0	0	0	0	0	0	0	0	0	0	0	0	0	0	0	0	0	0	0	0	0	0	0	0	0	0	0	0	0	0	0	0	0	0	0	0	0	0
crocetin biosynthesis	Group 1	0	0	0	0	0	0	0	0	0	0	0	0	0	0	0	0	0	0	0	0	0	0	0	0	0	0	0	0	0	0	0	0	0	0	0	0	0	0	0	0	0	0	0	0	0	0	0	0
crocetin esters biosynthesis	Group 1	0	0	0	0	0	0	0	0	0	0	0	0	0	0	0	0	0	0	0	0	0	0	0	0	0	0	0	0	0	0	0	0	0	0	0	0	0	0	0	0	0	0	0	0	0	0	0	0
betacyanin biosynthesis	Group 1	0	0	0	0	0	0	0	0	0	0	0	0	0	0	0	0	0	0	0	0	0	0	0	0	0	0	0	0	0	0	0	0	0	0	0	0	0	0	0	0	0	0	0	0	0	0	0	0
amaranthin biosynthesis	Group 1	0	0	0	0	0	0	0	0	0	0	0	0	0	0	0	0	0	0	0	0	0	0	0	0	0	0	0	0	0	0	0	0	0	0	0	0	0	0	0	0	0	0	0	0	0	0	0	0
betaxanthin biosynthesis (via dopaxanthin)	Group 1	0	0	0	0	0	0	0	0	0	0	0	0	0	0	0	0	0	0	0	0	0	0	0	0	0	0	0	0	0	0	0	0	0	0	0	0	0	0	0	0	0	0	0	0	0	0	0	0
divinyl ether biosynthesis I	Group 1	0	0	0	0	0	0	0	0	0	0	0	0	0	0	0	0	0	0	0	0	0	0	0	0	0	0	0	0	0	0	0	0	0	0	0	0	0	0	0	0	0	0	0	0	0	0	0	0
9-lipoxygenase and 9-allene oxide synthase pathway	Group 1	0	0	0	0	0	0	0	0	0	0	0	0	0	0	0	0	0	0	0	0	0	0	0	0	0	0	0	0	0	0	0	0	0	0	0	0	0	0	0	0	0	0	0	0	0	0	0	0
9-lipoxygenase and 9-hydroperoxide lyase pathway	Group 1	0	0	0	0	0	0	0	0	0	0	0	0	0	0	0	0	0	0	0	0	0	0	0	0	0	0	0	0	0	0	0	0	0	0	0	0	0	0	0	0	0	0	0	0	0	0	0	0
divinyl ether biosynthesis II	Group 1	0	0	0	0	0	0	0	0	0	0	0	0	0	0	0	0	0	0	0	0	0	0	0	0	0	0	0	0	0	0	0	0	0	0	0	0	0	0	0	0	0	0	0	0	0	0	0	0
traumatin and (Z)-3-hexen-1-yl acetate biosynthesis	Group 1	0	0	0	0	0	0	0	0	0	0	0	0	0	0	0	0	0	0	0	0	0	0	0	0	0	0	0	0	0	0	0	0	0	0	0	0	0	0	0	0	0	0	0	0	0	0	0	0
abietic acid biosynthesis	Group 1	0	0	0	0	0	0	0	0	0	0	0	0	0	0	0	0	0	0	0	0	0	0	0	0	0	0	0	0	0	0	0	0	0	0	0	0	0	0	0	0	0	0	0	0	0	0	0	0
levopimaric acid biosynthesis	Group 1	0	0	0	0	0	0	0	0	0	0	0	0	0	0	0	0	0	0	0	0	0	0	0	0	0	0	0	0	0	0	0	0	0	0	0	0	0	0	0	0	0	0	0	0	0	0	0	0
neoabietic acid biosynthesis	Group 1	0	0	0	0	0	0	0	0	0	0	0	0	0	0	0	0	0	0	0	0	0	0	0	0	0	0	0	0	0	0	0	0	0	0	0	0	0	0	0	0	0	0	0	0	0	0	0	0
palustric acid biosynthesis	Group 1	0	0	0	0	0	0	0	0	0	0	0	0	0	0	0	0	0	0	0	0	0	0	0	0	0	0	0	0	0	0	0	0	0	0	0	0	0	0	0	0	0	0	0	0	0	0	0	0
dehydroabietic acid biosynthesis	Group 1	0	0	0	0	0	0	0	0	0	0	0	0	0	0	0	0	0	0	0	0	0	0	0	0	0	0	0	0	0	0	0	0	0	0	0	0	0	0	0	0	0	0	0	0	0	0	0	0
isopimaric acid biosynthesis	Group 1	0	0	0	0	0	0	0	0	0	0	0	0	0	0	0	0	0	0	0	0	0	0	0	0	0	0	0	0	0	0	0	0	0	0	0	0	0	0	0	0	0	0	0	0	0	0	0	0
oleoresin monoterpene volatiles biosynthesis	Group 1	0	0	0	0	0	0	0	0	0	0	0	0	0	0	0	0	0	0	0	0	0	0	0	0	0	0	0	0	0	0	0	0	0	0	0	0	0	0	0	0	0	0	0	0	0	0	0	0
oleoresin sesquiterpene volatiles biosynthesis	Group 1	0	0	0	0	0	0	0	0	0	0	0	0	0	0	0	0	0	0	0	0	0	0	0	0	0	0	0	0	0	0	0	0	0	0	0	0	0	0	0	0	0	0	0	0	0	0	0	0
naphthalene degradation (aerobic)	Group 1	0	0	0	0	0	0	0	0	0	0	0	0	0	0	0	0	0	0	0	0	0	0	0	0	0	0	0	0	0	0	0	0	0	0	0	0	0	0	0	0	0	0	0	0	0	0	0	0
1,3-dimethylbenzene degradation to 3-methylbenzoate	Group 1	0	0	0	0	0	0	0	0	0	0	0	0	0	0	0	0	0	0	0	0	0	0	0	0	0	0	0	0	0	0	0	0	0	0	0	0	0	0	0	0	0	0	0	0	0	0	0	0
1,4-dimethylbenzene degradation to 4-methylbenzoate	Group 1	0	0	0	0	0	0	0	0	0	0	0	0	0	0	0	0	0	0	0	0	0	0	0	0	0	0	0	0	0	0	0	0	0	0	0	0	0	0	0	0	0	0	0	0	0	0	0	0
(3E)-4,8-dimethylnona-1,3,7-triene biosynthesis I	Group 1	0	0	0	0	0	0	0	0	0	0	0	0	0	0	0	0	0	0	0	0	0	0	0	0	0	0	0	0	0	0	0	0	0	0	0	0	0	0	0	0	0	0	0	0	0	0	0	0
betacyanin biosynthesis (via dopamine)	Group 1	0	0	0	0	0	0	0	0	0	0	0	0	0	0	0	0	0	0	0	0	0	0	0	0	0	0	0	0	0	0	0	0	0	0	0	0	0	0	0	0	0	0	0	0	0	0	0	0
benzene degradation	Group 1	0	0	0	0	0	0	0	0	0	0	0	0	0	0	0	0	0	0	0	0	0	0	0	0	0	0	0	0	0	0	0	0	0	0	0	0	0	0	0	0	0	0	0	0	0	0	0	0
acetone degradation I (to methylglyoxal)	Group 1	0	0	0	0	0	0	0	0	0	0	0	0	0	0	0	0	0	0	0	0	0	0	0	0	0	0	0	0	0	0	0	0	0	0	0	0	0	0	0	0	0	0	0	0	0	0	0	0
methylglyoxal degradation VII	Group 1	0	0	0	0	0	0	0	0	0	0	0	0	0	0	0	0	0	0	0	0	0	0	0	0	0	0	0	0	0	0	0	0	0	0	0	0	0	0	0	0	0	0	0	0	0	0	0	0
betanidin degradation	Group 1	0	0	0	0	0	0	0	0	0	0	0	0	0	0	0	0	0	0	0	0	0	0	0	0	0	0	0	0	0	0	0	0	0	0	0	0	0	0	0	0	0	0	0	0	0	0	0	0
methylglyoxal degradation II	Group 1	0	0	0	0	0	0	0	0	0	0	0	0	0	0	0	0	0	0	0	0	0	0	0	0	0	0	0	0	0	0	0	0	0	0	0	0	0	0	0	0	0	0	0	0	0	0	0	0
matairesinol biosynthesis	Group 1	0	0	0	0	0	0	0	0	0	0	0	0	0	0	0	0	0	0	0	0	0	0	0	0	0	0	0	0	0	0	0	0	0	0	0	0	0	0	0	0	0	0	0	0	0	0	0	0
gramine biosynthesis	Group 1	0	0	0	0	0	0	0	0	0	0	0	0	0	0	0	0	0	0	0	0	0	0	0	0	0	0	0	0	0	0	0	0	0	0	0	0	0	0	0	0	0	0	0	0	0	0	0	0
lupanine biosynthesis	Group 1	0	0	0	0	0	0	0	0	0	0	0	0	0	0	0	0	0	0	0	0	0	0	0	0	0	0	0	0	0	0	0	0	0	0	0	0	0	0	0	0	0	0	0	0	0	0	0	0
sesamin biosynthesis	Group 1	0	0	0	0	0	0	0	0	0	0	0	0	0	0	0	0	0	0	0	0	0	0	0	0	0	0	0	0	0	0	0	0	0	0	0	0	0	0	0	0	0	0	0	0	0	0	0	0
palmatine biosynthesis	Group 1	0	0	0	0	0	0	0	0	0	0	0	0	0	0	0	0	0	0	0	0	0	0	0	0	0	0	0	0	0	0	0	0	0	0	0	0	0	0	0	0	0	0	0	0	0	0	0	0
bisbenzylisoquinoline alkaloid biosynthesis	Group 1	0	0	0	0	0	0	0	0	0	0	0	0	0	0	0	0	0	0	0	0	0	0	0	0	0	0	0	0	0	0	0	0	0	0	0	0	0	0	0	0	0	0	0	0	0	0	0	0
hydroxycinnamic acid serotonin amides biosynthesis	Group 1	0	0	0	0	0	0	0	0	0	0	0	0	0	0	0	0	0	0	0	0	0	0	0	0	0	0	0	0	0	0	0	0	0	0	0	0	0	0	0	0	0	0	0	0	0	0	0	0
hydroxycinnamic acid tyramine amides biosynthesis	Group 1	0	0	0	0	0	0	0	0	0	0	0	0	0	0	0	0	0	0	0	0	0	0	0	0	0	0	0	0	0	0	0	0	0	0	0	0	0	0	0	0	0	0	0	0	0	0	0	0
pentagalloylglucose biosynthesis	Group 1	0	0	0	0	0	0	0	0	0	0	0	0	0	0	0	0	0	0	0	0	0	0	0	0	0	0	0	0	0	0	0	0	0	0	0	0	0	0	0	0	0	0	0	0	0	0	0	0
cornusiin E biosynthesis	Group 1	0	0	0	0	0	0	0	0	0	0	0	0	0	0	0	0	0	0	0	0	0	0	0	0	0	0	0	0	0	0	0	0	0	0	0	0	0	0	0	0	0	0	0	0	0	0	0	0
gallotannin biosynthesis	Group 1	0	0	0	0	0	0	0	0	0	0	0	0	0	0	0	0	0	0	0	0	0	0	0	0	0	0	0	0	0	0	0	0	0	0	0	0	0	0	0	0	0	0	0	0	0	0	0	0
6-methoxypodophyllotoxin biosynthesis	Group 1	0	0	0	0	0	0	0	0	0	0	0	0	0	0	0	0	0	0	0	0	0	0	0	0	0	0	0	0	0	0	0	0	0	0	0	0	0	0	0	0	0	0	0	0	0	0	0	0
4-nitrophenol degradation I	Group 1	0	0	0	0	0	0	0	0	0	0	0	0	0	0	0	0	0	0	0	0	0	0	0	0	0	0	0	0	0	0	0	0	0	0	0	0	0	0	0	0	0	0	0	0	0	0	0	0
4-nitrophenol degradation II	Group 1	0	0	0	0	0	0	0	0	0	0	0	0	0	0	0	0	0	0	0	0	0	0	0	0	0	0	0	0	0	0	0	0	0	0	0	0	0	0	0	0	0	0	0	0	0	0	0	0
reductive monocarboxylic acid cycle	Group 1	0	0	0	0	0	0	0	0	0	0	0	0	0	0	0	0	0	0	0	0	0	0	0	0	0	0	0	0	0	0	0	0	0	0	0	0	0	0	0	0	0	0	0	0	0	0	0	0
pyruvate fermentation to propanoate II (acrylate pathway)	Group 1	0	0	0	0	0	0	0	0	0	0	0	0	0	0	0	0	0	0	0	0	0	0	0	0	0	0	0	0	0	0	0	0	0	0	0	0	0	0	0	0	0	0	0	0	0	0	0	0
vitamin B6 degradation	Group 1	0	0	0	0	0	0	0	0	0	0	0	0	0	0	0	0	0	0	0	0	0	0	0	0	0	0	0	0	0	0	0	0	0	0	0	0	0	0	0	0	0	0	0	0	0	0	0	0
methanol oxidation to formaldehyde IV	Group 1	0	0	0	0	0	0	0	0	0	0	0	0	0	0	0	0	0	0	0	0	0	0	0	0	0	0	0	0	0	0	0	0	0	0	0	0	0	0	0	0	0	0	0	0	0	0	0	0
5,6-dimethylbenzimidazole biosynthesis I (aerobic)	Group 1	0	0	0	0	0	0	0	0	0	0	0	0	0	0	0	0	0	0	0	0	0	0	0	0	0	0	0	0	0	0	0	0	0	0	0	0	0	0	0	0	0	0	0	0	0	0	0	0
D-glucuronate degradation I	Group 1	0	0	0	0	0	0	0	0	0	0	0	0	0	0	0	0	0	0	0	0	0	0	0	0	0	0	0	0	0	0	0	0	0	0	0	0	0	0	0	0	0	0	0	0	0	0	0	0
bacteriochlorophyll a biosynthesis	Group 1	0	0	0	0	0	0	0	0	0	0	0	0	0	0	0	0	0	0	0	0	0	0	0	0	0	0	0	0	0	0	0	0	0	0	0	0	0	0	0	0	0	0	0	0	0	0	0	0
sorbitol biosynthesis II	Group 1	0	0	0	0	0	0	0	0	0	0	0	0	0	0	0	0	0	0	0	0	0	0	0	0	0	0	0	0	0	0	0	0	0	0	0	0	0	0	0	0	0	0	0	0	0	0	0	0
3,8-divinyl-chlorophyllide a biosynthesis II (anaerobic)	Group 1	0	0	0	0	0	0	0	0	0	0	0	0	0	0	0	0	0	0	0	0	0	0	0	0	0	0	0	0	0	0	0	0	0	0	0	0	0	0	0	0	0	0	0	0	0	0	0	0
nucleoside and nucleotide degradation (archaea)	Group 1	0	0	0	0	0	0	0	0	0	0	0	0	0	0	0	0	0	0	0	0	0	0	0	0	0	0	0	0	0	0	0	0	0	0	0	0	0	0	0	0	0	0	0	0	0	0	0	0
acetone degradation II (to acetoacetate)	Group 1	0	0	0	0	0	0	0	0	0	0	0	0	0	0	0	0	0	0	0	0	0	0	0	0	0	0	0	0	0	0	0	0	0	0	0	0	0	0	0	0	0	0	0	0	0	0	0	0
propene degradation	Group 1	0	0	0	0	0	0	0	0	0	0	0	0	0	0	0	0	0	0	0	0	0	0	0	0	0	0	0	0	0	0	0	0	0	0	0	0	0	0	0	0	0	0	0	0	0	0	0	0
isopenicillin N biosynthesis	Group 1	0	0	0	0	0	0	0	0	0	0	0	0	0	0	0	0	0	0	0	0	0	0	0	0	0	0	0	0	0	0	0	0	0	0	0	0	0	0	0	0	0	0	0	0	0	0	0	0
deacetylcephalosporin C biosynthesis	Group 1	0	0	0	0	0	0	0	0	0	0	0	0	0	0	0	0	0	0	0	0	0	0	0	0	0	0	0	0	0	0	0	0	0	0	0	0	0	0	0	0	0	0	0	0	0	0	0	0
cephalosporin C biosynthesis	Group 1	0	0	0	0	0	0	0	0	0	0	0	0	0	0	0	0	0	0	0	0	0	0	0	0	0	0	0	0	0	0	0	0	0	0	0	0	0	0	0	0	0	0	0	0	0	0	0	0
cephamycin C biosynthesis	Group 1	0	0	0	0	0	0	0	0	0	0	0	0	0	0	0	0	0	0	0	0	0	0	0	0	0	0	0	0	0	0	0	0	0	0	0	0	0	0	0	0	0	0	0	0	0	0	0	0
2-nitrophenol degradation	Group 1	0	0	0	0	0	0	0	0	0	0	0	0	0	0	0	0	0	0	0	0	0	0	0	0	0	0	0	0	0	0	0	0	0	0	0	0	0	0	0	0	0	0	0	0	0	0	0	0
nitrobenzene degradation I	Group 1	0	0	0	0	0	0	0	0	0	0	0	0	0	0	0	0	0	0	0	0	0	0	0	0	0	0	0	0	0	0	0	0	0	0	0	0	0	0	0	0	0	0	0	0	0	0	0	0
2,6-dinitrotoluene degradation	Group 1	0	0	0	0	0	0	0	0	0	0	0	0	0	0	0	0	0	0	0	0	0	0	0	0	0	0	0	0	0	0	0	0	0	0	0	0	0	0	0	0	0	0	0	0	0	0	0	0
4-nitrotoluene degradation II	Group 1	0	0	0	0	0	0	0	0	0	0	0	0	0	0	0	0	0	0	0	0	0	0	0	0	0	0	0	0	0	0	0	0	0	0	0	0	0	0	0	0	0	0	0	0	0	0	0	0
4-chloronitrobenzene degradation	Group 1	0	0	0	0	0	0	0	0	0	0	0	0	0	0	0	0	0	0	0	0	0	0	0	0	0	0	0	0	0	0	0	0	0	0	0	0	0	0	0	0	0	0	0	0	0	0	0	0
2-nitrobenzoate degradation II	Group 1	0	0	0	0	0	0	0	0	0	0	0	0	0	0	0	0	0	0	0	0	0	0	0	0	0	0	0	0	0	0	0	0	0	0	0	0	0	0	0	0	0	0	0	0	0	0	0	0
2-amino-3-carboxymuconate semialdehyde degradation to glutaryl-CoA	Group 1	0	0	0	0	0	0	0	0	0	0	0	0	0	0	0	0	0	0	0	0	0	0	0	0	0	0	0	0	0	0	0	0	0	0	0	0	0	0	0	0	0	0	0	0	0	0	0	0
mannosylglycerate biosynthesis II	Group 1	0	0	0	0	0	0	0	0	0	0	0	0	0	0	0	0	0	0	0	0	0	0	0	0	0	0	0	0	0	0	0	0	0	0	0	0	0	0	0	0	0	0	0	0	0	0	0	0
taxol biosynthesis	Group 1	0	0	0	0	0	0	0	0	0	0	0	0	0	0	0	0	0	0	0	0	0	0	0	0	0	0	0	0	0	0	0	0	0	0	0	0	0	0	0	0	0	0	0	0	0	0	0	0
GDP-&alpha;-D-glucose biosynthesis	Group 1	0	0	0	0	0	0	0	0	0	0	0	0	0	0	0	0	0	0	0	0	0	0	0	0	0	0	0	0	0	0	0	0	0	0	0	0	0	0	0	0	0	0	0	0	0	0	0	0
glucosylglycerate biosynthesis I	Group 1	0	0	0	0	0	0	0	0	0	0	0	0	0	0	0	0	0	0	0	0	0	0	0	0	0	0	0	0	0	0	0	0	0	0	0	0	0	0	0	0	0	0	0	0	0	0	0	0
erythro-tetrahydrobiopterin biosynthesis I	Group 1	0	0	0	0	0	0	0	0	0	0	0	0	0	0	0	0	0	0	0	0	0	0	0	0	0	0	0	0	0	0	0	0	0	0	0	0	0	0	0	0	0	0	0	0	0	0	0	0
vanillin biosynthesis I	Group 1	0	0	0	0	0	0	0	0	0	0	0	0	0	0	0	0	0	0	0	0	0	0	0	0	0	0	0	0	0	0	0	0	0	0	0	0	0	0	0	0	0	0	0	0	0	0	0	0
&alpha;-solanine/&alpha;-chaconine biosynthesis	Group 1	0	0	0	0	0	0	0	0	0	0	0	0	0	0	0	0	0	0	0	0	0	0	0	0	0	0	0	0	0	0	0	0	0	0	0	0	0	0	0	0	0	0	0	0	0	0	0	0
epoxysqualene biosynthesis	Group 1	0	0	0	0	0	0	0	0	0	0	0	0	0	0	0	0	0	0	0	0	0	0	0	0	0	0	0	0	0	0	0	0	0	0	0	0	0	0	0	0	0	0	0	0	0	0	0	0
ginsenosides biosynthesis	Group 1	0	0	0	0	0	0	0	0	0	0	0	0	0	0	0	0	0	0	0	0	0	0	0	0	0	0	0	0	0	0	0	0	0	0	0	0	0	0	0	0	0	0	0	0	0	0	0	0
nitrate reduction V (assimilatory)	Group 1	0	0	0	0	0	0	0	0	0	0	0	0	0	0	0	0	0	0	0	0	0	0	0	0	0	0	0	0	0	0	0	0	0	0	0	0	0	0	0	0	0	0	0	0	0	0	0	0
succinate fermentation to butanoate	Group 1	0	0	0	0	0	0	0	0	0	0	0	0	0	0	0	0	0	0	0	0	0	0	0	0	0	0	0	0	0	0	0	0	0	0	0	0	0	0	0	0	0	0	0	0	0	0	0	0
clavulanate biosynthesis	Group 1	0	0	0	0	0	0	0	0	0	0	0	0	0	0	0	0	0	0	0	0	0	0	0	0	0	0	0	0	0	0	0	0	0	0	0	0	0	0	0	0	0	0	0	0	0	0	0	0
urate conversion to allantoin I	Group 1	0	0	0	0	0	0	0	0	0	0	0	0	0	0	0	0	0	0	0	0	0	0	0	0	0	0	0	0	0	0	0	0	0	0	0	0	0	0	0	0	0	0	0	0	0	0	0	0
allantoin degradation to ureidoglycolate I (urea producing)	Group 1	0	0	0	0	0	0	0	0	0	0	0	0	0	0	0	0	0	0	0	0	0	0	0	0	0	0	0	0	0	0	0	0	0	0	0	0	0	0	0	0	0	0	0	0	0	0	0	0
shikonin biosynthesis	Group 1	0	0	0	0	0	0	0	0	0	0	0	0	0	0	0	0	0	0	0	0	0	0	0	0	0	0	0	0	0	0	0	0	0	0	0	0	0	0	0	0	0	0	0	0	0	0	0	0
alliin metabolism	Group 1	0	0	0	0	0	0	0	0	0	0	0	0	0	0	0	0	0	0	0	0	0	0	0	0	0	0	0	0	0	0	0	0	0	0	0	0	0	0	0	0	0	0	0	0	0	0	0	0
propanethial S-oxide biosynthesis	Group 1	0	0	0	0	0	0	0	0	0	0	0	0	0	0	0	0	0	0	0	0	0	0	0	0	0	0	0	0	0	0	0	0	0	0	0	0	0	0	0	0	0	0	0	0	0	0	0	0
ethiin metabolism	Group 1	0	0	0	0	0	0	0	0	0	0	0	0	0	0	0	0	0	0	0	0	0	0	0	0	0	0	0	0	0	0	0	0	0	0	0	0	0	0	0	0	0	0	0	0	0	0	0	0
capsaicin biosynthesis	Group 1	0	0	0	0	0	0	0	0	0	0	0	0	0	0	0	0	0	0	0	0	0	0	0	0	0	0	0	0	0	0	0	0	0	0	0	0	0	0	0	0	0	0	0	0	0	0	0	0
Rubisco shunt	Group 1	0	0	0	0	0	0	0	0	0	0	0	0	0	0	0	0	0	0	0	0	0	0	0	0	0	0	0	0	0	0	0	0	0	0	0	0	0	0	0	0	0	0	0	0	0	0	0	0
farnesene biosynthesis	Group 1	0	0	0	0	0	0	0	0	0	0	0	0	0	0	0	0	0	0	0	0	0	0	0	0	0	0	0	0	0	0	0	0	0	0	0	0	0	0	0	0	0	0	0	0	0	0	0	0
deethylsimazine degradation	Group 1	0	0	0	0	0	0	0	0	0	0	0	0	0	0	0	0	0	0	0	0	0	0	0	0	0	0	0	0	0	0	0	0	0	0	0	0	0	0	0	0	0	0	0	0	0	0	0	0
atrazine degradation II	Group 1	0	0	0	0	0	0	0	0	0	0	0	0	0	0	0	0	0	0	0	0	0	0	0	0	0	0	0	0	0	0	0	0	0	0	0	0	0	0	0	0	0	0	0	0	0	0	0	0
vestitol and sativan biosynthesis	Group 1	0	0	0	0	0	0	0	0	0	0	0	0	0	0	0	0	0	0	0	0	0	0	0	0	0	0	0	0	0	0	0	0	0	0	0	0	0	0	0	0	0	0	0	0	0	0	0	0
atrazine degradation III	Group 1	0	0	0	0	0	0	0	0	0	0	0	0	0	0	0	0	0	0	0	0	0	0	0	0	0	0	0	0	0	0	0	0	0	0	0	0	0	0	0	0	0	0	0	0	0	0	0	0
germacrene biosynthesis	Group 1	0	0	0	0	0	0	0	0	0	0	0	0	0	0	0	0	0	0	0	0	0	0	0	0	0	0	0	0	0	0	0	0	0	0	0	0	0	0	0	0	0	0	0	0	0	0	0	0
isopropylamine degradation	Group 1	0	0	0	0	0	0	0	0	0	0	0	0	0	0	0	0	0	0	0	0	0	0	0	0	0	0	0	0	0	0	0	0	0	0	0	0	0	0	0	0	0	0	0	0	0	0	0	0
(5R)-carbapenem carboxylate biosynthesis	Group 1	0	0	0	0	0	0	0	0	0	0	0	0	0	0	0	0	0	0	0	0	0	0	0	0	0	0	0	0	0	0	0	0	0	0	0	0	0	0	0	0	0	0	0	0	0	0	0	0
GDP-L-colitose biosynthesis	Group 1	0	0	0	0	0	0	0	0	0	0	0	0	0	0	0	0	0	0	0	0	0	0	0	0	0	0	0	0	0	0	0	0	0	0	0	0	0	0	0	0	0	0	0	0	0	0	0	0
ethylmalonyl-CoA pathway	Group 1	0	0	0	0	0	0	0	0	0	0	0	0	0	0	0	0	0	0	0	0	0	0	0	0	0	0	0	0	0	0	0	0	0	0	0	0	0	0	0	0	0	0	0	0	0	0	0	0
3-hydroxypropanoate cycle	Group 1	0	0	0	0	0	0	0	0	0	0	0	0	0	0	0	0	0	0	0	0	0	0	0	0	0	0	0	0	0	0	0	0	0	0	0	0	0	0	0	0	0	0	0	0	0	0	0	0
glyoxylate assimilation	Group 1	0	0	0	0	0	0	0	0	0	0	0	0	0	0	0	0	0	0	0	0	0	0	0	0	0	0	0	0	0	0	0	0	0	0	0	0	0	0	0	0	0	0	0	0	0	0	0	0
gamma-coniciene and coniine biosynthesis	Group 1	0	0	0	0	0	0	0	0	0	0	0	0	0	0	0	0	0	0	0	0	0	0	0	0	0	0	0	0	0	0	0	0	0	0	0	0	0	0	0	0	0	0	0	0	0	0	0	0
itaconate biosynthesis I	Group 1	0	0	0	0	0	0	0	0	0	0	0	0	0	0	0	0	0	0	0	0	0	0	0	0	0	0	0	0	0	0	0	0	0	0	0	0	0	0	0	0	0	0	0	0	0	0	0	0
phenylethanol biosynthesis	Group 1	0	0	0	0	0	0	0	0	0	0	0	0	0	0	0	0	0	0	0	0	0	0	0	0	0	0	0	0	0	0	0	0	0	0	0	0	0	0	0	0	0	0	0	0	0	0	0	0
piperine biosynthesis	Group 1	0	0	0	0	0	0	0	0	0	0	0	0	0	0	0	0	0	0	0	0	0	0	0	0	0	0	0	0	0	0	0	0	0	0	0	0	0	0	0	0	0	0	0	0	0	0	0	0
saponin biosynthesis II	Group 1	0	0	0	0	0	0	0	0	0	0	0	0	0	0	0	0	0	0	0	0	0	0	0	0	0	0	0	0	0	0	0	0	0	0	0	0	0	0	0	0	0	0	0	0	0	0	0	0
fosfomycin biosynthesis	Group 1	0	0	0	0	0	0	0	0	0	0	0	0	0	0	0	0	0	0	0	0	0	0	0	0	0	0	0	0	0	0	0	0	0	0	0	0	0	0	0	0	0	0	0	0	0	0	0	0
saponin biosynthesis III	Group 1	0	0	0	0	0	0	0	0	0	0	0	0	0	0	0	0	0	0	0	0	0	0	0	0	0	0	0	0	0	0	0	0	0	0	0	0	0	0	0	0	0	0	0	0	0	0	0	0
1,3,5-trimethoxybenzene biosynthesis	Group 1	0	0	0	0	0	0	0	0	0	0	0	0	0	0	0	0	0	0	0	0	0	0	0	0	0	0	0	0	0	0	0	0	0	0	0	0	0	0	0	0	0	0	0	0	0	0	0	0
phenazine-1-carboxylate biosynthesis	Group 1	0	0	0	0	0	0	0	0	0	0	0	0	0	0	0	0	0	0	0	0	0	0	0	0	0	0	0	0	0	0	0	0	0	0	0	0	0	0	0	0	0	0	0	0	0	0	0	0
gossypol biosynthesis	Group 1	0	0	0	0	0	0	0	0	0	0	0	0	0	0	0	0	0	0	0	0	0	0	0	0	0	0	0	0	0	0	0	0	0	0	0	0	0	0	0	0	0	0	0	0	0	0	0	0
saponin biosynthesis IV	Group 1	0	0	0	0	0	0	0	0	0	0	0	0	0	0	0	0	0	0	0	0	0	0	0	0	0	0	0	0	0	0	0	0	0	0	0	0	0	0	0	0	0	0	0	0	0	0	0	0
rotenoid biosynthesis I	Group 1	0	0	0	0	0	0	0	0	0	0	0	0	0	0	0	0	0	0	0	0	0	0	0	0	0	0	0	0	0	0	0	0	0	0	0	0	0	0	0	0	0	0	0	0	0	0	0	0
2-hydroxyphenazine biosynthesis	Group 1	0	0	0	0	0	0	0	0	0	0	0	0	0	0	0	0	0	0	0	0	0	0	0	0	0	0	0	0	0	0	0	0	0	0	0	0	0	0	0	0	0	0	0	0	0	0	0	0
hypericin biosynthesis	Group 1	0	0	0	0	0	0	0	0	0	0	0	0	0	0	0	0	0	0	0	0	0	0	0	0	0	0	0	0	0	0	0	0	0	0	0	0	0	0	0	0	0	0	0	0	0	0	0	0
indole-3-acetate inactivation VIII	Group 1	0	0	0	0	0	0	0	0	0	0	0	0	0	0	0	0	0	0	0	0	0	0	0	0	0	0	0	0	0	0	0	0	0	0	0	0	0	0	0	0	0	0	0	0	0	0	0	0
oligomeric urushiol biosynthesis	Group 1	0	0	0	0	0	0	0	0	0	0	0	0	0	0	0	0	0	0	0	0	0	0	0	0	0	0	0	0	0	0	0	0	0	0	0	0	0	0	0	0	0	0	0	0	0	0	0	0
indole-3-acetate inactivation V	Group 1	0	0	0	0	0	0	0	0	0	0	0	0	0	0	0	0	0	0	0	0	0	0	0	0	0	0	0	0	0	0	0	0	0	0	0	0	0	0	0	0	0	0	0	0	0	0	0	0
3-hydroxypropanoate/4-hydroxybutanate cycle	Group 1	0	0	0	0	0	0	0	0	0	0	0	0	0	0	0	0	0	0	0	0	0	0	0	0	0	0	0	0	0	0	0	0	0	0	0	0	0	0	0	0	0	0	0	0	0	0	0	0
maysin biosynthesis	Group 1	0	0	0	0	0	0	0	0	0	0	0	0	0	0	0	0	0	0	0	0	0	0	0	0	0	0	0	0	0	0	0	0	0	0	0	0	0	0	0	0	0	0	0	0	0	0	0	0
juglone biosynthesis	Group 1	0	0	0	0	0	0	0	0	0	0	0	0	0	0	0	0	0	0	0	0	0	0	0	0	0	0	0	0	0	0	0	0	0	0	0	0	0	0	0	0	0	0	0	0	0	0	0	0
indole-3-acetate inactivation VI	Group 1	0	0	0	0	0	0	0	0	0	0	0	0	0	0	0	0	0	0	0	0	0	0	0	0	0	0	0	0	0	0	0	0	0	0	0	0	0	0	0	0	0	0	0	0	0	0	0	0
xylan biosynthesis	Group 1	0	0	0	0	0	0	0	0	0	0	0	0	0	0	0	0	0	0	0	0	0	0	0	0	0	0	0	0	0	0	0	0	0	0	0	0	0	0	0	0	0	0	0	0	0	0	0	0
lawsone biosynthesis	Group 1	0	0	0	0	0	0	0	0	0	0	0	0	0	0	0	0	0	0	0	0	0	0	0	0	0	0	0	0	0	0	0	0	0	0	0	0	0	0	0	0	0	0	0	0	0	0	0	0
alizarin biosynthesis	Group 1	0	0	0	0	0	0	0	0	0	0	0	0	0	0	0	0	0	0	0	0	0	0	0	0	0	0	0	0	0	0	0	0	0	0	0	0	0	0	0	0	0	0	0	0	0	0	0	0
heptaprenyl diphosphate biosynthesis	Group 1	0	0	0	0	0	0	0	0	0	0	0	0	0	0	0	0	0	0	0	0	0	0	0	0	0	0	0	0	0	0	0	0	0	0	0	0	0	0	0	0	0	0	0	0	0	0	0	0
hyperforin and adhyperforin biosynthesis	Group 1	0	0	0	0	0	0	0	0	0	0	0	0	0	0	0	0	0	0	0	0	0	0	0	0	0	0	0	0	0	0	0	0	0	0	0	0	0	0	0	0	0	0	0	0	0	0	0	0
indole-3-acetate inactivation VII	Group 1	0	0	0	0	0	0	0	0	0	0	0	0	0	0	0	0	0	0	0	0	0	0	0	0	0	0	0	0	0	0	0	0	0	0	0	0	0	0	0	0	0	0	0	0	0	0	0	0
bornyl diphosphate biosynthesis	Group 1	0	0	0	0	0	0	0	0	0	0	0	0	0	0	0	0	0	0	0	0	0	0	0	0	0	0	0	0	0	0	0	0	0	0	0	0	0	0	0	0	0	0	0	0	0	0	0	0
rubber biosynthesis	Group 1	0	0	0	0	0	0	0	0	0	0	0	0	0	0	0	0	0	0	0	0	0	0	0	0	0	0	0	0	0	0	0	0	0	0	0	0	0	0	0	0	0	0	0	0	0	0	0	0
all trans undecaprenyl diphosphate biosynthesis	Group 1	0	0	0	0	0	0	0	0	0	0	0	0	0	0	0	0	0	0	0	0	0	0	0	0	0	0	0	0	0	0	0	0	0	0	0	0	0	0	0	0	0	0	0	0	0	0	0	0
dodecaprenyl diphosphate biosynthesis	Group 1	0	0	0	0	0	0	0	0	0	0	0	0	0	0	0	0	0	0	0	0	0	0	0	0	0	0	0	0	0	0	0	0	0	0	0	0	0	0	0	0	0	0	0	0	0	0	0	0
validamycin biosynthesis	Group 1	0	0	0	0	0	0	0	0	0	0	0	0	0	0	0	0	0	0	0	0	0	0	0	0	0	0	0	0	0	0	0	0	0	0	0	0	0	0	0	0	0	0	0	0	0	0	0	0
indole-3-acetate biosynthesis II	Group 1	0	0	0	0	0	0	0	0	0	0	0	0	0	0	0	0	0	0	0	0	0	0	0	0	0	0	0	0	0	0	0	0	0	0	0	0	0	0	0	0	0	0	0	0	0	0	0	0
dalcochinin biosynthesis	Group 1	0	0	0	0	0	0	0	0	0	0	0	0	0	0	0	0	0	0	0	0	0	0	0	0	0	0	0	0	0	0	0	0	0	0	0	0	0	0	0	0	0	0	0	0	0	0	0	0
trichloroethene degradation	Group 1	0	0	0	0	0	0	0	0	0	0	0	0	0	0	0	0	0	0	0	0	0	0	0	0	0	0	0	0	0	0	0	0	0	0	0	0	0	0	0	0	0	0	0	0	0	0	0	0
dalpatein and dalnigrein biosynthesis	Group 1	0	0	0	0	0	0	0	0	0	0	0	0	0	0	0	0	0	0	0	0	0	0	0	0	0	0	0	0	0	0	0	0	0	0	0	0	0	0	0	0	0	0	0	0	0	0	0	0
hypoglycin biosynthesis	Group 1	0	0	0	0	0	0	0	0	0	0	0	0	0	0	0	0	0	0	0	0	0	0	0	0	0	0	0	0	0	0	0	0	0	0	0	0	0	0	0	0	0	0	0	0	0	0	0	0
heliocides biosynthesis	Group 1	0	0	0	0	0	0	0	0	0	0	0	0	0	0	0	0	0	0	0	0	0	0	0	0	0	0	0	0	0	0	0	0	0	0	0	0	0	0	0	0	0	0	0	0	0	0	0	0
lacinilene C biosynthesis	Group 1	0	0	0	0	0	0	0	0	0	0	0	0	0	0	0	0	0	0	0	0	0	0	0	0	0	0	0	0	0	0	0	0	0	0	0	0	0	0	0	0	0	0	0	0	0	0	0	0
geraniol and geranial biosynthesis	Group 1	0	0	0	0	0	0	0	0	0	0	0	0	0	0	0	0	0	0	0	0	0	0	0	0	0	0	0	0	0	0	0	0	0	0	0	0	0	0	0	0	0	0	0	0	0	0	0	0
CDP-ascarylose biosynthesis	Group 1	0	0	0	0	0	0	0	0	0	0	0	0	0	0	0	0	0	0	0	0	0	0	0	0	0	0	0	0	0	0	0	0	0	0	0	0	0	0	0	0	0	0	0	0	0	0	0	0
CDP-abequose biosynthesis	Group 1	0	0	0	0	0	0	0	0	0	0	0	0	0	0	0	0	0	0	0	0	0	0	0	0	0	0	0	0	0	0	0	0	0	0	0	0	0	0	0	0	0	0	0	0	0	0	0	0
CDP-paratose biosynthesis	Group 1	0	0	0	0	0	0	0	0	0	0	0	0	0	0	0	0	0	0	0	0	0	0	0	0	0	0	0	0	0	0	0	0	0	0	0	0	0	0	0	0	0	0	0	0	0	0	0	0
CDP-tyvelose biosynthesis	Group 1	0	0	0	0	0	0	0	0	0	0	0	0	0	0	0	0	0	0	0	0	0	0	0	0	0	0	0	0	0	0	0	0	0	0	0	0	0	0	0	0	0	0	0	0	0	0	0	0
geranyl acetate biosynthesis	Group 1	0	0	0	0	0	0	0	0	0	0	0	0	0	0	0	0	0	0	0	0	0	0	0	0	0	0	0	0	0	0	0	0	0	0	0	0	0	0	0	0	0	0	0	0	0	0	0	0
cocaine biosynthesis	Group 1	0	0	0	0	0	0	0	0	0	0	0	0	0	0	0	0	0	0	0	0	0	0	0	0	0	0	0	0	0	0	0	0	0	0	0	0	0	0	0	0	0	0	0	0	0	0	0	0
colchicine biosynthesis	Group 1	0	0	0	0	0	0	0	0	0	0	0	0	0	0	0	0	0	0	0	0	0	0	0	0	0	0	0	0	0	0	0	0	0	0	0	0	0	0	0	0	0	0	0	0	0	0	0	0
cinchona alkaloids biosynthesis	Group 1	0	0	0	0	0	0	0	0	0	0	0	0	0	0	0	0	0	0	0	0	0	0	0	0	0	0	0	0	0	0	0	0	0	0	0	0	0	0	0	0	0	0	0	0	0	0	0	0
eugenol and isoeugenol biosynthesis	Group 1	0	0	0	0	0	0	0	0	0	0	0	0	0	0	0	0	0	0	0	0	0	0	0	0	0	0	0	0	0	0	0	0	0	0	0	0	0	0	0	0	0	0	0	0	0	0	0	0
t-anethole biosynthesis	Group 1	0	0	0	0	0	0	0	0	0	0	0	0	0	0	0	0	0	0	0	0	0	0	0	0	0	0	0	0	0	0	0	0	0	0	0	0	0	0	0	0	0	0	0	0	0	0	0	0
ubiquinol-10 biosynthesis (late decarboxylation)	Group 1	0	0	0	0	0	0	0	0	0	0	0	0	0	0	0	0	0	0	0	0	0	0	0	0	0	0	0	0	0	0	0	0	0	0	0	0	0	0	0	0	0	0	0	0	0	0	0	0
ubiquinol-7 biosynthesis (late decarboxylation)	Group 1	0	0	0	0	0	0	0	0	0	0	0	0	0	0	0	0	0	0	0	0	0	0	0	0	0	0	0	0	0	0	0	0	0	0	0	0	0	0	0	0	0	0	0	0	0	0	0	0
staphyloxanthin biosynthesis	Group 1	0	0	0	0	0	0	0	0	0	0	0	0	0	0	0	0	0	0	0	0	0	0	0	0	0	0	0	0	0	0	0	0	0	0	0	0	0	0	0	0	0	0	0	0	0	0	0	0
magnoflorine biosynthesis	Group 1	0	0	0	0	0	0	0	0	0	0	0	0	0	0	0	0	0	0	0	0	0	0	0	0	0	0	0	0	0	0	0	0	0	0	0	0	0	0	0	0	0	0	0	0	0	0	0	0
beta-carboline biosynthesis	Group 1	0	0	0	0	0	0	0	0	0	0	0	0	0	0	0	0	0	0	0	0	0	0	0	0	0	0	0	0	0	0	0	0	0	0	0	0	0	0	0	0	0	0	0	0	0	0	0	0
epoxypseudoisoeugenol-2-methylbutanoate biosynthesis	Group 1	0	0	0	0	0	0	0	0	0	0	0	0	0	0	0	0	0	0	0	0	0	0	0	0	0	0	0	0	0	0	0	0	0	0	0	0	0	0	0	0	0	0	0	0	0	0	0	0
ephedrine biosynthesis	Group 1	0	0	0	0	0	0	0	0	0	0	0	0	0	0	0	0	0	0	0	0	0	0	0	0	0	0	0	0	0	0	0	0	0	0	0	0	0	0	0	0	0	0	0	0	0	0	0	0
wax esters biosynthesis I	Group 1	0	0	0	0	0	0	0	0	0	0	0	0	0	0	0	0	0	0	0	0	0	0	0	0	0	0	0	0	0	0	0	0	0	0	0	0	0	0	0	0	0	0	0	0	0	0	0	0
wax esters biosynthesis II	Group 1	0	0	0	0	0	0	0	0	0	0	0	0	0	0	0	0	0	0	0	0	0	0	0	0	0	0	0	0	0	0	0	0	0	0	0	0	0	0	0	0	0	0	0	0	0	0	0	0
albaflavenone biosynthesis	Group 1	0	0	0	0	0	0	0	0	0	0	0	0	0	0	0	0	0	0	0	0	0	0	0	0	0	0	0	0	0	0	0	0	0	0	0	0	0	0	0	0	0	0	0	0	0	0	0	0
rhodoquinone-10 biosynthesis	Group 1	0	0	0	0	0	0	0	0	0	0	0	0	0	0	0	0	0	0	0	0	0	0	0	0	0	0	0	0	0	0	0	0	0	0	0	0	0	0	0	0	0	0	0	0	0	0	0	0
rhodoquinone-9 biosynthesis	Group 1	0	0	0	0	0	0	0	0	0	0	0	0	0	0	0	0	0	0	0	0	0	0	0	0	0	0	0	0	0	0	0	0	0	0	0	0	0	0	0	0	0	0	0	0	0	0	0	0
tridecaprenyl diphosphate biosynthesis	Group 1	0	0	0	0	0	0	0	0	0	0	0	0	0	0	0	0	0	0	0	0	0	0	0	0	0	0	0	0	0	0	0	0	0	0	0	0	0	0	0	0	0	0	0	0	0	0	0	0
hypusine biosynthesis	Group 1	0	0	0	0	0	0	0	0	0	0	0	0	0	0	0	0	0	0	0	0	0	0	0	0	0	0	0	0	0	0	0	0	0	0	0	0	0	0	0	0	0	0	0	0	0	0	0	0
2'-deoxymugineic acid phytosiderophore biosynthesis	Group 1	0	0	0	0	0	0	0	0	0	0	0	0	0	0	0	0	0	0	0	0	0	0	0	0	0	0	0	0	0	0	0	0	0	0	0	0	0	0	0	0	0	0	0	0	0	0	0	0
phycoerythrobilin biosynthesis I	Group 1	0	0	0	0	0	0	0	0	0	0	0	0	0	0	0	0	0	0	0	0	0	0	0	0	0	0	0	0	0	0	0	0	0	0	0	0	0	0	0	0	0	0	0	0	0	0	0	0
phycocyanobilin biosynthesis	Group 1	0	0	0	0	0	0	0	0	0	0	0	0	0	0	0	0	0	0	0	0	0	0	0	0	0	0	0	0	0	0	0	0	0	0	0	0	0	0	0	0	0	0	0	0	0	0	0	0
(4R)-carveol and (4R)-dihydrocarveol degradation	Group 1	0	0	0	0	0	0	0	0	0	0	0	0	0	0	0	0	0	0	0	0	0	0	0	0	0	0	0	0	0	0	0	0	0	0	0	0	0	0	0	0	0	0	0	0	0	0	0	0
limonene degradation I (D-limonene)	Group 1	0	0	0	0	0	0	0	0	0	0	0	0	0	0	0	0	0	0	0	0	0	0	0	0	0	0	0	0	0	0	0	0	0	0	0	0	0	0	0	0	0	0	0	0	0	0	0	0
limonene degradation II (L-limonene)	Group 1	0	0	0	0	0	0	0	0	0	0	0	0	0	0	0	0	0	0	0	0	0	0	0	0	0	0	0	0	0	0	0	0	0	0	0	0	0	0	0	0	0	0	0	0	0	0	0	0
hydroxylated mugineic acid phytosiderophore biosynthesis	Group 1	0	0	0	0	0	0	0	0	0	0	0	0	0	0	0	0	0	0	0	0	0	0	0	0	0	0	0	0	0	0	0	0	0	0	0	0	0	0	0	0	0	0	0	0	0	0	0	0
afrormosin conjugates interconversion	Group 1	0	0	0	0	0	0	0	0	0	0	0	0	0	0	0	0	0	0	0	0	0	0	0	0	0	0	0	0	0	0	0	0	0	0	0	0	0	0	0	0	0	0	0	0	0	0	0	0
(4S)-carveol and (4S)-dihydrocarveol degradation	Group 1	0	0	0	0	0	0	0	0	0	0	0	0	0	0	0	0	0	0	0	0	0	0	0	0	0	0	0	0	0	0	0	0	0	0	0	0	0	0	0	0	0	0	0	0	0	0	0	0
(4R)-carvone biosynthesis	Group 1	0	0	0	0	0	0	0	0	0	0	0	0	0	0	0	0	0	0	0	0	0	0	0	0	0	0	0	0	0	0	0	0	0	0	0	0	0	0	0	0	0	0	0	0	0	0	0	0
puromycin biosynthesis	Group 1	0	0	0	0	0	0	0	0	0	0	0	0	0	0	0	0	0	0	0	0	0	0	0	0	0	0	0	0	0	0	0	0	0	0	0	0	0	0	0	0	0	0	0	0	0	0	0	0
terpentecin biosynthesis	Group 1	0	0	0	0	0	0	0	0	0	0	0	0	0	0	0	0	0	0	0	0	0	0	0	0	0	0	0	0	0	0	0	0	0	0	0	0	0	0	0	0	0	0	0	0	0	0	0	0
iron reduction and absorption	Group 1	0	0	0	0	0	0	0	0	0	0	0	0	0	0	0	0	0	0	0	0	0	0	0	0	0	0	0	0	0	0	0	0	0	0	0	0	0	0	0	0	0	0	0	0	0	0	0	0
1-tuberculosinyladenosine biosynthesis	Group 1	0	0	0	0	0	0	0	0	0	0	0	0	0	0	0	0	0	0	0	0	0	0	0	0	0	0	0	0	0	0	0	0	0	0	0	0	0	0	0	0	0	0	0	0	0	0	0	0
xyloglucan biosynthesis	Group 1	0	0	0	0	0	0	0	0	0	0	0	0	0	0	0	0	0	0	0	0	0	0	0	0	0	0	0	0	0	0	0	0	0	0	0	0	0	0	0	0	0	0	0	0	0	0	0	0
streptomycin biosynthesis	Group 1	0	0	0	0	0	0	0	0	0	0	0	0	0	0	0	0	0	0	0	0	0	0	0	0	0	0	0	0	0	0	0	0	0	0	0	0	0	0	0	0	0	0	0	0	0	0	0	0
violaxanthin, antheraxanthin and zeaxanthin interconversion	Group 1	0	0	0	0	0	0	0	0	0	0	0	0	0	0	0	0	0	0	0	0	0	0	0	0	0	0	0	0	0	0	0	0	0	0	0	0	0	0	0	0	0	0	0	0	0	0	0	0
&alpha;-carotene biosynthesis	Group 1	0	0	0	0	0	0	0	0	0	0	0	0	0	0	0	0	0	0	0	0	0	0	0	0	0	0	0	0	0	0	0	0	0	0	0	0	0	0	0	0	0	0	0	0	0	0	0	0
lutein biosynthesis	Group 1	0	0	0	0	0	0	0	0	0	0	0	0	0	0	0	0	0	0	0	0	0	0	0	0	0	0	0	0	0	0	0	0	0	0	0	0	0	0	0	0	0	0	0	0	0	0	0	0
geosmin biosynthesis	Group 1	0	0	0	0	0	0	0	0	0	0	0	0	0	0	0	0	0	0	0	0	0	0	0	0	0	0	0	0	0	0	0	0	0	0	0	0	0	0	0	0	0	0	0	0	0	0	0	0
(1'S,5'S)-averufin biosynthesis	Group 1	0	0	0	0	0	0	0	0	0	0	0	0	0	0	0	0	0	0	0	0	0	0	0	0	0	0	0	0	0	0	0	0	0	0	0	0	0	0	0	0	0	0	0	0	0	0	0	0
versicolorin B biosynthesis	Group 1	0	0	0	0	0	0	0	0	0	0	0	0	0	0	0	0	0	0	0	0	0	0	0	0	0	0	0	0	0	0	0	0	0	0	0	0	0	0	0	0	0	0	0	0	0	0	0	0
sterigmatocystin biosynthesis	Group 1	0	0	0	0	0	0	0	0	0	0	0	0	0	0	0	0	0	0	0	0	0	0	0	0	0	0	0	0	0	0	0	0	0	0	0	0	0	0	0	0	0	0	0	0	0	0	0	0
L-nicotianamine biosynthesis	Group 1	0	0	0	0	0	0	0	0	0	0	0	0	0	0	0	0	0	0	0	0	0	0	0	0	0	0	0	0	0	0	0	0	0	0	0	0	0	0	0	0	0	0	0	0	0	0	0	0
acridone alkaloid biosynthesis	Group 1	0	0	0	0	0	0	0	0	0	0	0	0	0	0	0	0	0	0	0	0	0	0	0	0	0	0	0	0	0	0	0	0	0	0	0	0	0	0	0	0	0	0	0	0	0	0	0	0
aflatoxins B1 and G1 biosynthesis	Group 1	0	0	0	0	0	0	0	0	0	0	0	0	0	0	0	0	0	0	0	0	0	0	0	0	0	0	0	0	0	0	0	0	0	0	0	0	0	0	0	0	0	0	0	0	0	0	0	0
aflatoxins B2 and G2 biosynthesis	Group 1	0	0	0	0	0	0	0	0	0	0	0	0	0	0	0	0	0	0	0	0	0	0	0	0	0	0	0	0	0	0	0	0	0	0	0	0	0	0	0	0	0	0	0	0	0	0	0	0
lupinate biosynthesis	Group 1	0	0	0	0	0	0	0	0	0	0	0	0	0	0	0	0	0	0	0	0	0	0	0	0	0	0	0	0	0	0	0	0	0	0	0	0	0	0	0	0	0	0	0	0	0	0	0	0
cinnamate esters biosynthesis	Group 1	0	0	0	0	0	0	0	0	0	0	0	0	0	0	0	0	0	0	0	0	0	0	0	0	0	0	0	0	0	0	0	0	0	0	0	0	0	0	0	0	0	0	0	0	0	0	0	0
stearate biosynthesis I (animals)	Group 1	0	0	0	0	0	0	0	0	0	0	0	0	0	0	0	0	0	0	0	0	0	0	0	0	0	0	0	0	0	0	0	0	0	0	0	0	0	0	0	0	0	0	0	0	0	0	0	0
furaneol and mesifurane biosynthesis	Group 1	0	0	0	0	0	0	0	0	0	0	0	0	0	0	0	0	0	0	0	0	0	0	0	0	0	0	0	0	0	0	0	0	0	0	0	0	0	0	0	0	0	0	0	0	0	0	0	0
dhurrin degradation	Group 1	0	0	0	0	0	0	0	0	0	0	0	0	0	0	0	0	0	0	0	0	0	0	0	0	0	0	0	0	0	0	0	0	0	0	0	0	0	0	0	0	0	0	0	0	0	0	0	0
kanosamine biosynthesis I	Group 1	0	0	0	0	0	0	0	0	0	0	0	0	0	0	0	0	0	0	0	0	0	0	0	0	0	0	0	0	0	0	0	0	0	0	0	0	0	0	0	0	0	0	0	0	0	0	0	0
3-amino-5-hydroxybenzoate biosynthesis	Group 1	0	0	0	0	0	0	0	0	0	0	0	0	0	0	0	0	0	0	0	0	0	0	0	0	0	0	0	0	0	0	0	0	0	0	0	0	0	0	0	0	0	0	0	0	0	0	0	0
xylogalacturonan biosynthesis	Group 1	0	0	0	0	0	0	0	0	0	0	0	0	0	0	0	0	0	0	0	0	0	0	0	0	0	0	0	0	0	0	0	0	0	0	0	0	0	0	0	0	0	0	0	0	0	0	0	0
trehalose biosynthesis VI	Group 1	0	0	0	0	0	0	0	0	0	0	0	0	0	0	0	0	0	0	0	0	0	0	0	0	0	0	0	0	0	0	0	0	0	0	0	0	0	0	0	0	0	0	0	0	0	0	0	0
rifamycin B biosynthesis	Group 1	0	0	0	0	0	0	0	0	0	0	0	0	0	0	0	0	0	0	0	0	0	0	0	0	0	0	0	0	0	0	0	0	0	0	0	0	0	0	0	0	0	0	0	0	0	0	0	0
sorgoleone biosynthesis	Group 1	0	0	0	0	0	0	0	0	0	0	0	0	0	0	0	0	0	0	0	0	0	0	0	0	0	0	0	0	0	0	0	0	0	0	0	0	0	0	0	0	0	0	0	0	0	0	0	0
lotaustralin biosynthesis	Group 1	0	0	0	0	0	0	0	0	0	0	0	0	0	0	0	0	0	0	0	0	0	0	0	0	0	0	0	0	0	0	0	0	0	0	0	0	0	0	0	0	0	0	0	0	0	0	0	0
thalianol and derivatives biosynthesis	Group 1	0	0	0	0	0	0	0	0	0	0	0	0	0	0	0	0	0	0	0	0	0	0	0	0	0	0	0	0	0	0	0	0	0	0	0	0	0	0	0	0	0	0	0	0	0	0	0	0
linoleate biosynthesis I (plants)	Group 1	0	0	0	0	0	0	0	0	0	0	0	0	0	0	0	0	0	0	0	0	0	0	0	0	0	0	0	0	0	0	0	0	0	0	0	0	0	0	0	0	0	0	0	0	0	0	0	0
&alpha;-linolenate biosynthesis I (plants and red algae)	Group 1	0	0	0	0	0	0	0	0	0	0	0	0	0	0	0	0	0	0	0	0	0	0	0	0	0	0	0	0	0	0	0	0	0	0	0	0	0	0	0	0	0	0	0	0	0	0	0	0
gamma-linolenate biosynthesis I (plants)	Group 1	0	0	0	0	0	0	0	0	0	0	0	0	0	0	0	0	0	0	0	0	0	0	0	0	0	0	0	0	0	0	0	0	0	0	0	0	0	0	0	0	0	0	0	0	0	0	0	0
canavanine biosynthesis	Group 1	0	0	0	0	0	0	0	0	0	0	0	0	0	0	0	0	0	0	0	0	0	0	0	0	0	0	0	0	0	0	0	0	0	0	0	0	0	0	0	0	0	0	0	0	0	0	0	0
gamma-linolenate biosynthesis II (animals)	Group 1	0	0	0	0	0	0	0	0	0	0	0	0	0	0	0	0	0	0	0	0	0	0	0	0	0	0	0	0	0	0	0	0	0	0	0	0	0	0	0	0	0	0	0	0	0	0	0	0
linoleate biosynthesis II (animals)	Group 1	0	0	0	0	0	0	0	0	0	0	0	0	0	0	0	0	0	0	0	0	0	0	0	0	0	0	0	0	0	0	0	0	0	0	0	0	0	0	0	0	0	0	0	0	0	0	0	0
lotaustralin degradation	Group 1	0	0	0	0	0	0	0	0	0	0	0	0	0	0	0	0	0	0	0	0	0	0	0	0	0	0	0	0	0	0	0	0	0	0	0	0	0	0	0	0	0	0	0	0	0	0	0	0
glycine betaine biosynthesis V (from glycine)	Group 1	0	0	0	0	0	0	0	0	0	0	0	0	0	0	0	0	0	0	0	0	0	0	0	0	0	0	0	0	0	0	0	0	0	0	0	0	0	0	0	0	0	0	0	0	0	0	0	0
marneral biosynthesis	Group 1	0	0	0	0	0	0	0	0	0	0	0	0	0	0	0	0	0	0	0	0	0	0	0	0	0	0	0	0	0	0	0	0	0	0	0	0	0	0	0	0	0	0	0	0	0	0	0	0
(3E)-4,8-dimethylnona-1,3,7-triene biosynthesis II	Group 1	0	0	0	0	0	0	0	0	0	0	0	0	0	0	0	0	0	0	0	0	0	0	0	0	0	0	0	0	0	0	0	0	0	0	0	0	0	0	0	0	0	0	0	0	0	0	0	0
baruol biosynthesis	Group 1	0	0	0	0	0	0	0	0	0	0	0	0	0	0	0	0	0	0	0	0	0	0	0	0	0	0	0	0	0	0	0	0	0	0	0	0	0	0	0	0	0	0	0	0	0	0	0	0
apigenin glycosides biosynthesis	Group 1	0	0	0	0	0	0	0	0	0	0	0	0	0	0	0	0	0	0	0	0	0	0	0	0	0	0	0	0	0	0	0	0	0	0	0	0	0	0	0	0	0	0	0	0	0	0	0	0
amygdalin and prunasin degradation	Group 1	0	0	0	0	0	0	0	0	0	0	0	0	0	0	0	0	0	0	0	0	0	0	0	0	0	0	0	0	0	0	0	0	0	0	0	0	0	0	0	0	0	0	0	0	0	0	0	0
vernolate biosynthesis I	Group 1	0	0	0	0	0	0	0	0	0	0	0	0	0	0	0	0	0	0	0	0	0	0	0	0	0	0	0	0	0	0	0	0	0	0	0	0	0	0	0	0	0	0	0	0	0	0	0	0
vitexin and derivatives biosynthesis	Group 1	0	0	0	0	0	0	0	0	0	0	0	0	0	0	0	0	0	0	0	0	0	0	0	0	0	0	0	0	0	0	0	0	0	0	0	0	0	0	0	0	0	0	0	0	0	0	0	0
glucosinolate biosynthesis from tryptophan	Group 1	0	0	0	0	0	0	0	0	0	0	0	0	0	0	0	0	0	0	0	0	0	0	0	0	0	0	0	0	0	0	0	0	0	0	0	0	0	0	0	0	0	0	0	0	0	0	0	0
nitrilotriacetate degradation	Group 1	0	0	0	0	0	0	0	0	0	0	0	0	0	0	0	0	0	0	0	0	0	0	0	0	0	0	0	0	0	0	0	0	0	0	0	0	0	0	0	0	0	0	0	0	0	0	0	0
isovitexin glycosides biosynthesis	Group 1	0	0	0	0	0	0	0	0	0	0	0	0	0	0	0	0	0	0	0	0	0	0	0	0	0	0	0	0	0	0	0	0	0	0	0	0	0	0	0	0	0	0	0	0	0	0	0	0
capsiconiate biosynthesis	Group 1	0	0	0	0	0	0	0	0	0	0	0	0	0	0	0	0	0	0	0	0	0	0	0	0	0	0	0	0	0	0	0	0	0	0	0	0	0	0	0	0	0	0	0	0	0	0	0	0
2,3-trans-flavanols biosynthesis	Group 1	0	0	0	0	0	0	0	0	0	0	0	0	0	0	0	0	0	0	0	0	0	0	0	0	0	0	0	0	0	0	0	0	0	0	0	0	0	0	0	0	0	0	0	0	0	0	0	0
serotonin and melatonin biosynthesis	Group 1	0	0	0	0	0	0	0	0	0	0	0	0	0	0	0	0	0	0	0	0	0	0	0	0	0	0	0	0	0	0	0	0	0	0	0	0	0	0	0	0	0	0	0	0	0	0	0	0
digitoxigenin biosynthesis	Group 1	0	0	0	0	0	0	0	0	0	0	0	0	0	0	0	0	0	0	0	0	0	0	0	0	0	0	0	0	0	0	0	0	0	0	0	0	0	0	0	0	0	0	0	0	0	0	0	0
cardenolide glucosides biosynthesis	Group 1	0	0	0	0	0	0	0	0	0	0	0	0	0	0	0	0	0	0	0	0	0	0	0	0	0	0	0	0	0	0	0	0	0	0	0	0	0	0	0	0	0	0	0	0	0	0	0	0
chlorogenic acid biosynthesis I	Group 1	0	0	0	0	0	0	0	0	0	0	0	0	0	0	0	0	0	0	0	0	0	0	0	0	0	0	0	0	0	0	0	0	0	0	0	0	0	0	0	0	0	0	0	0	0	0	0	0
chlorogenic acid biosynthesis II	Group 1	0	0	0	0	0	0	0	0	0	0	0	0	0	0	0	0	0	0	0	0	0	0	0	0	0	0	0	0	0	0	0	0	0	0	0	0	0	0	0	0	0	0	0	0	0	0	0	0
4-sulfocatechol degradation	Group 1	0	0	0	0	0	0	0	0	0	0	0	0	0	0	0	0	0	0	0	0	0	0	0	0	0	0	0	0	0	0	0	0	0	0	0	0	0	0	0	0	0	0	0	0	0	0	0	0
ethanedisulfonate degradation	Group 1	0	0	0	0	0	0	0	0	0	0	0	0	0	0	0	0	0	0	0	0	0	0	0	0	0	0	0	0	0	0	0	0	0	0	0	0	0	0	0	0	0	0	0	0	0	0	0	0
methanesulfonate degradation	Group 1	0	0	0	0	0	0	0	0	0	0	0	0	0	0	0	0	0	0	0	0	0	0	0	0	0	0	0	0	0	0	0	0	0	0	0	0	0	0	0	0	0	0	0	0	0	0	0	0
methylthiopropanonate degradation II (demethylation)	Group 1	0	0	0	0	0	0	0	0	0	0	0	0	0	0	0	0	0	0	0	0	0	0	0	0	0	0	0	0	0	0	0	0	0	0	0	0	0	0	0	0	0	0	0	0	0	0	0	0
dimethyl sulfide degradation I	Group 1	0	0	0	0	0	0	0	0	0	0	0	0	0	0	0	0	0	0	0	0	0	0	0	0	0	0	0	0	0	0	0	0	0	0	0	0	0	0	0	0	0	0	0	0	0	0	0	0
2,4,6-trinitrotoluene degradation	Group 1	0	0	0	0	0	0	0	0	0	0	0	0	0	0	0	0	0	0	0	0	0	0	0	0	0	0	0	0	0	0	0	0	0	0	0	0	0	0	0	0	0	0	0	0	0	0	0	0
dimethylsulfoniopropanoate degradation III (demethylation)	Group 1	0	0	0	0	0	0	0	0	0	0	0	0	0	0	0	0	0	0	0	0	0	0	0	0	0	0	0	0	0	0	0	0	0	0	0	0	0	0	0	0	0	0	0	0	0	0	0	0
dimethylsulfoniopropanoate biosynthesis III (algae and phytoplankton)	Group 1	0	0	0	0	0	0	0	0	0	0	0	0	0	0	0	0	0	0	0	0	0	0	0	0	0	0	0	0	0	0	0	0	0	0	0	0	0	0	0	0	0	0	0	0	0	0	0	0
dimethylsulfoniopropanoate biosynthesis I (Wollastonia)	Group 1	0	0	0	0	0	0	0	0	0	0	0	0	0	0	0	0	0	0	0	0	0	0	0	0	0	0	0	0	0	0	0	0	0	0	0	0	0	0	0	0	0	0	0	0	0	0	0	0
dimethylsulfoniopropanoate biosynthesis II (Spartina)	Group 1	0	0	0	0	0	0	0	0	0	0	0	0	0	0	0	0	0	0	0	0	0	0	0	0	0	0	0	0	0	0	0	0	0	0	0	0	0	0	0	0	0	0	0	0	0	0	0	0
dimethylsulfide to cytochrome c2 electron transfer	Group 1	0	0	0	0	0	0	0	0	0	0	0	0	0	0	0	0	0	0	0	0	0	0	0	0	0	0	0	0	0	0	0	0	0	0	0	0	0	0	0	0	0	0	0	0	0	0	0	0
dimethyl sulfone degradation	Group 1	0	0	0	0	0	0	0	0	0	0	0	0	0	0	0	0	0	0	0	0	0	0	0	0	0	0	0	0	0	0	0	0	0	0	0	0	0	0	0	0	0	0	0	0	0	0	0	0
bile acid biosynthesis, neutral pathway	Group 1	0	0	0	0	0	0	0	0	0	0	0	0	0	0	0	0	0	0	0	0	0	0	0	0	0	0	0	0	0	0	0	0	0	0	0	0	0	0	0	0	0	0	0	0	0	0	0	0
methylquercetin biosynthesis	Group 1	0	0	0	0	0	0	0	0	0	0	0	0	0	0	0	0	0	0	0	0	0	0	0	0	0	0	0	0	0	0	0	0	0	0	0	0	0	0	0	0	0	0	0	0	0	0	0	0
indican biosynthesis	Group 1	0	0	0	0	0	0	0	0	0	0	0	0	0	0	0	0	0	0	0	0	0	0	0	0	0	0	0	0	0	0	0	0	0	0	0	0	0	0	0	0	0	0	0	0	0	0	0	0
zymosterol biosynthesis	Group 1	0	0	0	0	0	0	0	0	0	0	0	0	0	0	0	0	0	0	0	0	0	0	0	0	0	0	0	0	0	0	0	0	0	0	0	0	0	0	0	0	0	0	0	0	0	0	0	0
ergosterol biosynthesis I	Group 1	0	0	0	0	0	0	0	0	0	0	0	0	0	0	0	0	0	0	0	0	0	0	0	0	0	0	0	0	0	0	0	0	0	0	0	0	0	0	0	0	0	0	0	0	0	0	0	0
vitamin D3 biosynthesis	Group 1	0	0	0	0	0	0	0	0	0	0	0	0	0	0	0	0	0	0	0	0	0	0	0	0	0	0	0	0	0	0	0	0	0	0	0	0	0	0	0	0	0	0	0	0	0	0	0	0
1,3-dichlorobenzene degradation	Group 1	0	0	0	0	0	0	0	0	0	0	0	0	0	0	0	0	0	0	0	0	0	0	0	0	0	0	0	0	0	0	0	0	0	0	0	0	0	0	0	0	0	0	0	0	0	0	0	0
alginate biosynthesis II (bacterial)	Group 1	0	0	0	0	0	0	0	0	0	0	0	0	0	0	0	0	0	0	0	0	0	0	0	0	0	0	0	0	0	0	0	0	0	0	0	0	0	0	0	0	0	0	0	0	0	0	0	0
chlorobenzene degradation	Group 1	0	0	0	0	0	0	0	0	0	0	0	0	0	0	0	0	0	0	0	0	0	0	0	0	0	0	0	0	0	0	0	0	0	0	0	0	0	0	0	0	0	0	0	0	0	0	0	0
2,4-dichlorophenoxyacetate degradation	Group 1	0	0	0	0	0	0	0	0	0	0	0	0	0	0	0	0	0	0	0	0	0	0	0	0	0	0	0	0	0	0	0	0	0	0	0	0	0	0	0	0	0	0	0	0	0	0	0	0
4-chloro-2-methylphenoxyacetate degradation	Group 1	0	0	0	0	0	0	0	0	0	0	0	0	0	0	0	0	0	0	0	0	0	0	0	0	0	0	0	0	0	0	0	0	0	0	0	0	0	0	0	0	0	0	0	0	0	0	0	0
3-chlorobenzoate degradation I (via chlorocatechol)	Group 1	0	0	0	0	0	0	0	0	0	0	0	0	0	0	0	0	0	0	0	0	0	0	0	0	0	0	0	0	0	0	0	0	0	0	0	0	0	0	0	0	0	0	0	0	0	0	0	0
3-chlorocatechol degradation I (ortho)	Group 1	0	0	0	0	0	0	0	0	0	0	0	0	0	0	0	0	0	0	0	0	0	0	0	0	0	0	0	0	0	0	0	0	0	0	0	0	0	0	0	0	0	0	0	0	0	0	0	0
1,2-dichlorobenzene degradation	Group 1	0	0	0	0	0	0	0	0	0	0	0	0	0	0	0	0	0	0	0	0	0	0	0	0	0	0	0	0	0	0	0	0	0	0	0	0	0	0	0	0	0	0	0	0	0	0	0	0
1,2,4-trichlorobenzene degradation	Group 1	0	0	0	0	0	0	0	0	0	0	0	0	0	0	0	0	0	0	0	0	0	0	0	0	0	0	0	0	0	0	0	0	0	0	0	0	0	0	0	0	0	0	0	0	0	0	0	0
4,5-dichlorocatechol degradation	Group 1	0	0	0	0	0	0	0	0	0	0	0	0	0	0	0	0	0	0	0	0	0	0	0	0	0	0	0	0	0	0	0	0	0	0	0	0	0	0	0	0	0	0	0	0	0	0	0	0
3,4,6-trichlorocatechol degradation	Group 1	0	0	0	0	0	0	0	0	0	0	0	0	0	0	0	0	0	0	0	0	0	0	0	0	0	0	0	0	0	0	0	0	0	0	0	0	0	0	0	0	0	0	0	0	0	0	0	0
dammara-20,24-diene biosynthesis	Group 1	0	0	0	0	0	0	0	0	0	0	0	0	0	0	0	0	0	0	0	0	0	0	0	0	0	0	0	0	0	0	0	0	0	0	0	0	0	0	0	0	0	0	0	0	0	0	0	0
diploterol biosynthesis	Group 1	0	0	0	0	0	0	0	0	0	0	0	0	0	0	0	0	0	0	0	0	0	0	0	0	0	0	0	0	0	0	0	0	0	0	0	0	0	0	0	0	0	0	0	0	0	0	0	0
L-carnitine biosynthesis	Group 1	0	0	0	0	0	0	0	0	0	0	0	0	0	0	0	0	0	0	0	0	0	0	0	0	0	0	0	0	0	0	0	0	0	0	0	0	0	0	0	0	0	0	0	0	0	0	0	0
5-chloro-3-methyl-catechol degradation	Group 1	0	0	0	0	0	0	0	0	0	0	0	0	0	0	0	0	0	0	0	0	0	0	0	0	0	0	0	0	0	0	0	0	0	0	0	0	0	0	0	0	0	0	0	0	0	0	0	0
3-chlorotoluene degradation I	Group 1	0	0	0	0	0	0	0	0	0	0	0	0	0	0	0	0	0	0	0	0	0	0	0	0	0	0	0	0	0	0	0	0	0	0	0	0	0	0	0	0	0	0	0	0	0	0	0	0
3-chlorotoluene degradation II	Group 1	0	0	0	0	0	0	0	0	0	0	0	0	0	0	0	0	0	0	0	0	0	0	0	0	0	0	0	0	0	0	0	0	0	0	0	0	0	0	0	0	0	0	0	0	0	0	0	0
botryococcenes and methylated squalene biosynthesis	Group 1	0	0	0	0	0	0	0	0	0	0	0	0	0	0	0	0	0	0	0	0	0	0	0	0	0	0	0	0	0	0	0	0	0	0	0	0	0	0	0	0	0	0	0	0	0	0	0	0
mangrove triterpenoid biosynthesis	Group 1	0	0	0	0	0	0	0	0	0	0	0	0	0	0	0	0	0	0	0	0	0	0	0	0	0	0	0	0	0	0	0	0	0	0	0	0	0	0	0	0	0	0	0	0	0	0	0	0
mitochondrial L-carnitine shuttle	Group 1	0	0	0	0	0	0	0	0	0	0	0	0	0	0	0	0	0	0	0	0	0	0	0	0	0	0	0	0	0	0	0	0	0	0	0	0	0	0	0	0	0	0	0	0	0	0	0	0
spermine and spermidine degradation I	Group 1	0	0	0	0	0	0	0	0	0	0	0	0	0	0	0	0	0	0	0	0	0	0	0	0	0	0	0	0	0	0	0	0	0	0	0	0	0	0	0	0	0	0	0	0	0	0	0	0
inosine-5'-phosphate biosynthesis II	Group 1	0	0	0	0	0	0	0	0	0	0	0	0	0	0	0	0	0	0	0	0	0	0	0	0	0	0	0	0	0	0	0	0	0	0	0	0	0	0	0	0	0	0	0	0	0	0	0	0
cis-calamenene related sesquiterpenoids biosynthesis	Group 1	0	0	0	0	0	0	0	0	0	0	0	0	0	0	0	0	0	0	0	0	0	0	0	0	0	0	0	0	0	0	0	0	0	0	0	0	0	0	0	0	0	0	0	0	0	0	0	0
dolichol and dolichyl phosphate biosynthesis	Group 1	0	0	0	0	0	0	0	0	0	0	0	0	0	0	0	0	0	0	0	0	0	0	0	0	0	0	0	0	0	0	0	0	0	0	0	0	0	0	0	0	0	0	0	0	0	0	0	0
lanosterol biosynthesis	Group 1	0	0	0	0	0	0	0	0	0	0	0	0	0	0	0	0	0	0	0	0	0	0	0	0	0	0	0	0	0	0	0	0	0	0	0	0	0	0	0	0	0	0	0	0	0	0	0	0
(S)-reticuline biosynthesis II	Group 1	0	0	0	0	0	0	0	0	0	0	0	0	0	0	0	0	0	0	0	0	0	0	0	0	0	0	0	0	0	0	0	0	0	0	0	0	0	0	0	0	0	0	0	0	0	0	0	0
CMP-N-acetylneuraminate biosynthesis I (eukaryotes)	Group 1	0	0	0	0	0	0	0	0	0	0	0	0	0	0	0	0	0	0	0	0	0	0	0	0	0	0	0	0	0	0	0	0	0	0	0	0	0	0	0	0	0	0	0	0	0	0	0	0
CMP-2-keto-3-deoxy-D-glycero-D-galacto-nononate biosynthesis	Group 1	0	0	0	0	0	0	0	0	0	0	0	0	0	0	0	0	0	0	0	0	0	0	0	0	0	0	0	0	0	0	0	0	0	0	0	0	0	0	0	0	0	0	0	0	0	0	0	0
CMP-pseudaminate biosynthesis	Group 1	0	0	0	0	0	0	0	0	0	0	0	0	0	0	0	0	0	0	0	0	0	0	0	0	0	0	0	0	0	0	0	0	0	0	0	0	0	0	0	0	0	0	0	0	0	0	0	0
CMP-N-glycoloylneuraminate biosynthesis	Group 1	0	0	0	0	0	0	0	0	0	0	0	0	0	0	0	0	0	0	0	0	0	0	0	0	0	0	0	0	0	0	0	0	0	0	0	0	0	0	0	0	0	0	0	0	0	0	0	0
6-hydroxymethyl-dihydropterin diphosphate biosynthesis I	Group 1	0	0	0	0	0	0	0	0	0	0	0	0	0	0	0	0	0	0	0	0	0	0	0	0	0	0	0	0	0	0	0	0	0	0	0	0	0	0	0	0	0	0	0	0	0	0	0	0
tetrahydromethanopterin biosynthesis	Group 1	0	0	0	0	0	0	0	0	0	0	0	0	0	0	0	0	0	0	0	0	0	0	0	0	0	0	0	0	0	0	0	0	0	0	0	0	0	0	0	0	0	0	0	0	0	0	0	0
autoinducer AI-2 biosynthesis II (Vibrio)	Group 1	0	0	0	0	0	0	0	0	0	0	0	0	0	0	0	0	0	0	0	0	0	0	0	0	0	0	0	0	0	0	0	0	0	0	0	0	0	0	0	0	0	0	0	0	0	0	0	0
creatine-phosphate biosynthesis	Group 1	0	0	0	0	0	0	0	0	0	0	0	0	0	0	0	0	0	0	0	0	0	0	0	0	0	0	0	0	0	0	0	0	0	0	0	0	0	0	0	0	0	0	0	0	0	0	0	0
3-dehydroquinate biosynthesis II (archaea)	Group 1	0	0	0	0	0	0	0	0	0	0	0	0	0	0	0	0	0	0	0	0	0	0	0	0	0	0	0	0	0	0	0	0	0	0	0	0	0	0	0	0	0	0	0	0	0	0	0	0
flavin biosynthesis II (archaea)	Group 1	0	0	0	0	0	0	0	0	0	0	0	0	0	0	0	0	0	0	0	0	0	0	0	0	0	0	0	0	0	0	0	0	0	0	0	0	0	0	0	0	0	0	0	0	0	0	0	0
mevalonate pathway II (haloarchaea)	Group 1	0	0	0	0	0	0	0	0	0	0	0	0	0	0	0	0	0	0	0	0	0	0	0	0	0	0	0	0	0	0	0	0	0	0	0	0	0	0	0	0	0	0	0	0	0	0	0	0
2,4,6-trichlorophenol degradation	Group 1	0	0	0	0	0	0	0	0	0	0	0	0	0	0	0	0	0	0	0	0	0	0	0	0	0	0	0	0	0	0	0	0	0	0	0	0	0	0	0	0	0	0	0	0	0	0	0	0
2,4-dichlorotoluene degradation	Group 1	0	0	0	0	0	0	0	0	0	0	0	0	0	0	0	0	0	0	0	0	0	0	0	0	0	0	0	0	0	0	0	0	0	0	0	0	0	0	0	0	0	0	0	0	0	0	0	0
2,5-dichlorotoluene degradation	Group 1	0	0	0	0	0	0	0	0	0	0	0	0	0	0	0	0	0	0	0	0	0	0	0	0	0	0	0	0	0	0	0	0	0	0	0	0	0	0	0	0	0	0	0	0	0	0	0	0
3,4-dichlorotoluene degradation	Group 1	0	0	0	0	0	0	0	0	0	0	0	0	0	0	0	0	0	0	0	0	0	0	0	0	0	0	0	0	0	0	0	0	0	0	0	0	0	0	0	0	0	0	0	0	0	0	0	0
3-chlorocatechol degradation II (ortho)	Group 1	0	0	0	0	0	0	0	0	0	0	0	0	0	0	0	0	0	0	0	0	0	0	0	0	0	0	0	0	0	0	0	0	0	0	0	0	0	0	0	0	0	0	0	0	0	0	0	0
quercetin sulfate biosynthesis	Group 1	0	0	0	0	0	0	0	0	0	0	0	0	0	0	0	0	0	0	0	0	0	0	0	0	0	0	0	0	0	0	0	0	0	0	0	0	0	0	0	0	0	0	0	0	0	0	0	0
2,4,5-trichlorophenoxyacetate degradation	Group 1	0	0	0	0	0	0	0	0	0	0	0	0	0	0	0	0	0	0	0	0	0	0	0	0	0	0	0	0	0	0	0	0	0	0	0	0	0	0	0	0	0	0	0	0	0	0	0	0
2-aminophenol degradation	Group 1	0	0	0	0	0	0	0	0	0	0	0	0	0	0	0	0	0	0	0	0	0	0	0	0	0	0	0	0	0	0	0	0	0	0	0	0	0	0	0	0	0	0	0	0	0	0	0	0
4-chlorobenzoate degradation	Group 1	0	0	0	0	0	0	0	0	0	0	0	0	0	0	0	0	0	0	0	0	0	0	0	0	0	0	0	0	0	0	0	0	0	0	0	0	0	0	0	0	0	0	0	0	0	0	0	0
indole-3-acetate inactivation VIII	Group 1	0	0	0	0	0	0	0	0	0	0	0	0	0	0	0	0	0	0	0	0	0	0	0	0	0	0	0	0	0	0	0	0	0	0	0	0	0	0	0	0	0	0	0	0	0	0	0	0
jasmonoyl-amino acid conjugates biosynthesis I	Group 1	0	0	0	0	0	0	0	0	0	0	0	0	0	0	0	0	0	0	0	0	0	0	0	0	0	0	0	0	0	0	0	0	0	0	0	0	0	0	0	0	0	0	0	0	0	0	0	0
3-chlorobenzoate degradation III (via gentisate)	Group 1	0	0	0	0	0	0	0	0	0	0	0	0	0	0	0	0	0	0	0	0	0	0	0	0	0	0	0	0	0	0	0	0	0	0	0	0	0	0	0	0	0	0	0	0	0	0	0	0
starch biosynthesis	Group 1	0	0	0	0	0	0	0	0	0	0	0	0	0	0	0	0	0	0	0	0	0	0	0	0	0	0	0	0	0	0	0	0	0	0	0	0	0	0	0	0	0	0	0	0	0	0	0	0
chrysoeriol biosynthesis	Group 1	0	0	0	0	0	0	0	0	0	0	0	0	0	0	0	0	0	0	0	0	0	0	0	0	0	0	0	0	0	0	0	0	0	0	0	0	0	0	0	0	0	0	0	0	0	0	0	0
jasmonoyl-amino acid conjugates biosynthesis II	Group 1	0	0	0	0	0	0	0	0	0	0	0	0	0	0	0	0	0	0	0	0	0	0	0	0	0	0	0	0	0	0	0	0	0	0	0	0	0	0	0	0	0	0	0	0	0	0	0	0
luteolin glycosides biosynthesis	Group 1	0	0	0	0	0	0	0	0	0	0	0	0	0	0	0	0	0	0	0	0	0	0	0	0	0	0	0	0	0	0	0	0	0	0	0	0	0	0	0	0	0	0	0	0	0	0	0	0
thyroid hormone biosynthesis	Group 1	0	0	0	0	0	0	0	0	0	0	0	0	0	0	0	0	0	0	0	0	0	0	0	0	0	0	0	0	0	0	0	0	0	0	0	0	0	0	0	0	0	0	0	0	0	0	0	0
bergamotene biosynthesis I	Group 1	0	0	0	0	0	0	0	0	0	0	0	0	0	0	0	0	0	0	0	0	0	0	0	0	0	0	0	0	0	0	0	0	0	0	0	0	0	0	0	0	0	0	0	0	0	0	0	0
bergamotene biosynthesis II	Group 1	0	0	0	0	0	0	0	0	0	0	0	0	0	0	0	0	0	0	0	0	0	0	0	0	0	0	0	0	0	0	0	0	0	0	0	0	0	0	0	0	0	0	0	0	0	0	0	0
santalene biosynthesis I	Group 1	0	0	0	0	0	0	0	0	0	0	0	0	0	0	0	0	0	0	0	0	0	0	0	0	0	0	0	0	0	0	0	0	0	0	0	0	0	0	0	0	0	0	0	0	0	0	0	0
curcumene biosynthesis	Group 1	0	0	0	0	0	0	0	0	0	0	0	0	0	0	0	0	0	0	0	0	0	0	0	0	0	0	0	0	0	0	0	0	0	0	0	0	0	0	0	0	0	0	0	0	0	0	0	0
patchoulol biosynthesis	Group 1	0	0	0	0	0	0	0	0	0	0	0	0	0	0	0	0	0	0	0	0	0	0	0	0	0	0	0	0	0	0	0	0	0	0	0	0	0	0	0	0	0	0	0	0	0	0	0	0
thyroid hormone metabolism I (via deiodination)	Group 1	0	0	0	0	0	0	0	0	0	0	0	0	0	0	0	0	0	0	0	0	0	0	0	0	0	0	0	0	0	0	0	0	0	0	0	0	0	0	0	0	0	0	0	0	0	0	0	0
demethylmenaquinol-8 biosynthesis II	Group 1	0	0	0	0	0	0	0	0	0	0	0	0	0	0	0	0	0	0	0	0	0	0	0	0	0	0	0	0	0	0	0	0	0	0	0	0	0	0	0	0	0	0	0	0	0	0	0	0
zerumbone biosynthesis	Group 1	0	0	0	0	0	0	0	0	0	0	0	0	0	0	0	0	0	0	0	0	0	0	0	0	0	0	0	0	0	0	0	0	0	0	0	0	0	0	0	0	0	0	0	0	0	0	0	0
eudesmol biosynthesis	Group 1	0	0	0	0	0	0	0	0	0	0	0	0	0	0	0	0	0	0	0	0	0	0	0	0	0	0	0	0	0	0	0	0	0	0	0	0	0	0	0	0	0	0	0	0	0	0	0	0
beta-caryophyllene biosynthesis	Group 1	0	0	0	0	0	0	0	0	0	0	0	0	0	0	0	0	0	0	0	0	0	0	0	0	0	0	0	0	0	0	0	0	0	0	0	0	0	0	0	0	0	0	0	0	0	0	0	0
botrydial biosynthesis	Group 1	0	0	0	0	0	0	0	0	0	0	0	0	0	0	0	0	0	0	0	0	0	0	0	0	0	0	0	0	0	0	0	0	0	0	0	0	0	0	0	0	0	0	0	0	0	0	0	0
myxol-2' fucoside biosynthesis	Group 1	0	0	0	0	0	0	0	0	0	0	0	0	0	0	0	0	0	0	0	0	0	0	0	0	0	0	0	0	0	0	0	0	0	0	0	0	0	0	0	0	0	0	0	0	0	0	0	0
synechoxanthin biosynthesis	Group 1	0	0	0	0	0	0	0	0	0	0	0	0	0	0	0	0	0	0	0	0	0	0	0	0	0	0	0	0	0	0	0	0	0	0	0	0	0	0	0	0	0	0	0	0	0	0	0	0
L-selenocysteine biosynthesis II (archaea and eukaryotes)	Group 1	0	0	0	0	0	0	0	0	0	0	0	0	0	0	0	0	0	0	0	0	0	0	0	0	0	0	0	0	0	0	0	0	0	0	0	0	0	0	0	0	0	0	0	0	0	0	0	0
spheroidene and spheroidenone biosynthesis	Group 1	0	0	0	0	0	0	0	0	0	0	0	0	0	0	0	0	0	0	0	0	0	0	0	0	0	0	0	0	0	0	0	0	0	0	0	0	0	0	0	0	0	0	0	0	0	0	0	0
beta-cubebene biosynthesis	Group 1	0	0	0	0	0	0	0	0	0	0	0	0	0	0	0	0	0	0	0	0	0	0	0	0	0	0	0	0	0	0	0	0	0	0	0	0	0	0	0	0	0	0	0	0	0	0	0	0
valencene and 7-epi-&alpha;-selinene biosynthesis	Group 1	0	0	0	0	0	0	0	0	0	0	0	0	0	0	0	0	0	0	0	0	0	0	0	0	0	0	0	0	0	0	0	0	0	0	0	0	0	0	0	0	0	0	0	0	0	0	0	0
selinene biosynthesis	Group 1	0	0	0	0	0	0	0	0	0	0	0	0	0	0	0	0	0	0	0	0	0	0	0	0	0	0	0	0	0	0	0	0	0	0	0	0	0	0	0	0	0	0	0	0	0	0	0	0
tuberonate glucoside biosynthesis	Group 1	0	0	0	0	0	0	0	0	0	0	0	0	0	0	0	0	0	0	0	0	0	0	0	0	0	0	0	0	0	0	0	0	0	0	0	0	0	0	0	0	0	0	0	0	0	0	0	0
dihydroconiferyl alcohol biosynthesis	Group 1	0	0	0	0	0	0	0	0	0	0	0	0	0	0	0	0	0	0	0	0	0	0	0	0	0	0	0	0	0	0	0	0	0	0	0	0	0	0	0	0	0	0	0	0	0	0	0	0
methyl indole-3-acetate interconversion	Group 1	0	0	0	0	0	0	0	0	0	0	0	0	0	0	0	0	0	0	0	0	0	0	0	0	0	0	0	0	0	0	0	0	0	0	0	0	0	0	0	0	0	0	0	0	0	0	0	0
casbene biosynthesis	Group 1	0	0	0	0	0	0	0	0	0	0	0	0	0	0	0	0	0	0	0	0	0	0	0	0	0	0	0	0	0	0	0	0	0	0	0	0	0	0	0	0	0	0	0	0	0	0	0	0
L-cysteine biosynthesis II (tRNA-dependent)	Group 1	0	0	0	0	0	0	0	0	0	0	0	0	0	0	0	0	0	0	0	0	0	0	0	0	0	0	0	0	0	0	0	0	0	0	0	0	0	0	0	0	0	0	0	0	0	0	0	0
aloesone biosynthesis II	Group 1	0	0	0	0	0	0	0	0	0	0	0	0	0	0	0	0	0	0	0	0	0	0	0	0	0	0	0	0	0	0	0	0	0	0	0	0	0	0	0	0	0	0	0	0	0	0	0	0
barbaloin biosynthesis	Group 1	0	0	0	0	0	0	0	0	0	0	0	0	0	0	0	0	0	0	0	0	0	0	0	0	0	0	0	0	0	0	0	0	0	0	0	0	0	0	0	0	0	0	0	0	0	0	0	0
plumbagin biosynthesis	Group 1	0	0	0	0	0	0	0	0	0	0	0	0	0	0	0	0	0	0	0	0	0	0	0	0	0	0	0	0	0	0	0	0	0	0	0	0	0	0	0	0	0	0	0	0	0	0	0	0
aromatic polyketides biosynthesis	Group 1	0	0	0	0	0	0	0	0	0	0	0	0	0	0	0	0	0	0	0	0	0	0	0	0	0	0	0	0	0	0	0	0	0	0	0	0	0	0	0	0	0	0	0	0	0	0	0	0
L-phenylalanine degradation IV (mammalian, via side chain)	Group 1	0	0	0	0	0	0	0	0	0	0	0	0	0	0	0	0	0	0	0	0	0	0	0	0	0	0	0	0	0	0	0	0	0	0	0	0	0	0	0	0	0	0	0	0	0	0	0	0
phaselate biosynthesis	Group 1	0	0	0	0	0	0	0	0	0	0	0	0	0	0	0	0	0	0	0	0	0	0	0	0	0	0	0	0	0	0	0	0	0	0	0	0	0	0	0	0	0	0	0	0	0	0	0	0
phosphinothricin tripeptide biosynthesis	Group 1	0	0	0	0	0	0	0	0	0	0	0	0	0	0	0	0	0	0	0	0	0	0	0	0	0	0	0	0	0	0	0	0	0	0	0	0	0	0	0	0	0	0	0	0	0	0	0	0
benzoylanthranilate biosynthesis	Group 1	0	0	0	0	0	0	0	0	0	0	0	0	0	0	0	0	0	0	0	0	0	0	0	0	0	0	0	0	0	0	0	0	0	0	0	0	0	0	0	0	0	0	0	0	0	0	0	0
rebeccamycin biosynthesis	Group 1	0	0	0	0	0	0	0	0	0	0	0	0	0	0	0	0	0	0	0	0	0	0	0	0	0	0	0	0	0	0	0	0	0	0	0	0	0	0	0	0	0	0	0	0	0	0	0	0
echinatin biosynthesis	Group 1	0	0	0	0	0	0	0	0	0	0	0	0	0	0	0	0	0	0	0	0	0	0	0	0	0	0	0	0	0	0	0	0	0	0	0	0	0	0	0	0	0	0	0	0	0	0	0	0
camptothecin biosynthesis	Group 1	0	0	0	0	0	0	0	0	0	0	0	0	0	0	0	0	0	0	0	0	0	0	0	0	0	0	0	0	0	0	0	0	0	0	0	0	0	0	0	0	0	0	0	0	0	0	0	0
tetrathionate oxidation	Group 1	0	0	0	0	0	0	0	0	0	0	0	0	0	0	0	0	0	0	0	0	0	0	0	0	0	0	0	0	0	0	0	0	0	0	0	0	0	0	0	0	0	0	0	0	0	0	0	0
coumestrol biosynthesis	Group 1	0	0	0	0	0	0	0	0	0	0	0	0	0	0	0	0	0	0	0	0	0	0	0	0	0	0	0	0	0	0	0	0	0	0	0	0	0	0	0	0	0	0	0	0	0	0	0	0
L-dopa degradation I (mammalian)	Group 1	0	0	0	0	0	0	0	0	0	0	0	0	0	0	0	0	0	0	0	0	0	0	0	0	0	0	0	0	0	0	0	0	0	0	0	0	0	0	0	0	0	0	0	0	0	0	0	0
protocatechuate degradation III (para-cleavage pathway)	Group 1	0	0	0	0	0	0	0	0	0	0	0	0	0	0	0	0	0	0	0	0	0	0	0	0	0	0	0	0	0	0	0	0	0	0	0	0	0	0	0	0	0	0	0	0	0	0	0	0
dehydroscoulerine biosynthesis	Group 1	0	0	0	0	0	0	0	0	0	0	0	0	0	0	0	0	0	0	0	0	0	0	0	0	0	0	0	0	0	0	0	0	0	0	0	0	0	0	0	0	0	0	0	0	0	0	0	0
5,5'-dehydrodivanillate degradation	Group 1	0	0	0	0	0	0	0	0	0	0	0	0	0	0	0	0	0	0	0	0	0	0	0	0	0	0	0	0	0	0	0	0	0	0	0	0	0	0	0	0	0	0	0	0	0	0	0	0
guaiacylglycerol-beta-guaiacyl ether degradation	Group 1	0	0	0	0	0	0	0	0	0	0	0	0	0	0	0	0	0	0	0	0	0	0	0	0	0	0	0	0	0	0	0	0	0	0	0	0	0	0	0	0	0	0	0	0	0	0	0	0
L-arginine degradation XIV (oxidative Stickland reaction)	Group 1	0	0	0	0	0	0	0	0	0	0	0	0	0	0	0	0	0	0	0	0	0	0	0	0	0	0	0	0	0	0	0	0	0	0	0	0	0	0	0	0	0	0	0	0	0	0	0	0
K-252 biosynthesis	Group 1	0	0	0	0	0	0	0	0	0	0	0	0	0	0	0	0	0	0	0	0	0	0	0	0	0	0	0	0	0	0	0	0	0	0	0	0	0	0	0	0	0	0	0	0	0	0	0	0
staurosporine biosynthesis	Group 1	0	0	0	0	0	0	0	0	0	0	0	0	0	0	0	0	0	0	0	0	0	0	0	0	0	0	0	0	0	0	0	0	0	0	0	0	0	0	0	0	0	0	0	0	0	0	0	0
CDP-archaeol biosynthesis	Group 1	0	0	0	0	0	0	0	0	0	0	0	0	0	0	0	0	0	0	0	0	0	0	0	0	0	0	0	0	0	0	0	0	0	0	0	0	0	0	0	0	0	0	0	0	0	0	0	0
D-myo-inositol (1,4,5)-trisphosphate biosynthesis	Group 1	0	0	0	0	0	0	0	0	0	0	0	0	0	0	0	0	0	0	0	0	0	0	0	0	0	0	0	0	0	0	0	0	0	0	0	0	0	0	0	0	0	0	0	0	0	0	0	0
3-phosphoinositide biosynthesis	Group 1	0	0	0	0	0	0	0	0	0	0	0	0	0	0	0	0	0	0	0	0	0	0	0	0	0	0	0	0	0	0	0	0	0	0	0	0	0	0	0	0	0	0	0	0	0	0	0	0
1D-myo-inositol hexakisphosphate biosynthesis I (from Ins(1,4,5)P3)	Group 1	0	0	0	0	0	0	0	0	0	0	0	0	0	0	0	0	0	0	0	0	0	0	0	0	0	0	0	0	0	0	0	0	0	0	0	0	0	0	0	0	0	0	0	0	0	0	0	0
1D-myo-inositol hexakisphosphate biosynthesis II (mammalian)	Group 1	0	0	0	0	0	0	0	0	0	0	0	0	0	0	0	0	0	0	0	0	0	0	0	0	0	0	0	0	0	0	0	0	0	0	0	0	0	0	0	0	0	0	0	0	0	0	0	0
D-myo-inositol (1,4,5)-trisphosphate degradation	Group 1	0	0	0	0	0	0	0	0	0	0	0	0	0	0	0	0	0	0	0	0	0	0	0	0	0	0	0	0	0	0	0	0	0	0	0	0	0	0	0	0	0	0	0	0	0	0	0	0
D-myo-inositol (1,3,4)-trisphosphate biosynthesis	Group 1	0	0	0	0	0	0	0	0	0	0	0	0	0	0	0	0	0	0	0	0	0	0	0	0	0	0	0	0	0	0	0	0	0	0	0	0	0	0	0	0	0	0	0	0	0	0	0	0
D-myo-inositol (3,4,5,6)-tetrakisphosphate biosynthesis	Group 1	0	0	0	0	0	0	0	0	0	0	0	0	0	0	0	0	0	0	0	0	0	0	0	0	0	0	0	0	0	0	0	0	0	0	0	0	0	0	0	0	0	0	0	0	0	0	0	0
D-myo-inositol (1,4,5,6)-tetrakisphosphate biosynthesis	Group 1	0	0	0	0	0	0	0	0	0	0	0	0	0	0	0	0	0	0	0	0	0	0	0	0	0	0	0	0	0	0	0	0	0	0	0	0	0	0	0	0	0	0	0	0	0	0	0	0
D-myo-inositol-5-phosphate metabolism	Group 1	0	0	0	0	0	0	0	0	0	0	0	0	0	0	0	0	0	0	0	0	0	0	0	0	0	0	0	0	0	0	0	0	0	0	0	0	0	0	0	0	0	0	0	0	0	0	0	0
3-phosphoinositide degradation	Group 1	0	0	0	0	0	0	0	0	0	0	0	0	0	0	0	0	0	0	0	0	0	0	0	0	0	0	0	0	0	0	0	0	0	0	0	0	0	0	0	0	0	0	0	0	0	0	0	0
inositol diphosphates biosynthesis	Group 1	0	0	0	0	0	0	0	0	0	0	0	0	0	0	0	0	0	0	0	0	0	0	0	0	0	0	0	0	0	0	0	0	0	0	0	0	0	0	0	0	0	0	0	0	0	0	0	0
1D-myo-inositol hexakisphosphate biosynthesis IV (Dictyostelium)	Group 1	0	0	0	0	0	0	0	0	0	0	0	0	0	0	0	0	0	0	0	0	0	0	0	0	0	0	0	0	0	0	0	0	0	0	0	0	0	0	0	0	0	0	0	0	0	0	0	0
desferrioxamine B biosynthesis	Group 1	0	0	0	0	0	0	0	0	0	0	0	0	0	0	0	0	0	0	0	0	0	0	0	0	0	0	0	0	0	0	0	0	0	0	0	0	0	0	0	0	0	0	0	0	0	0	0	0
&alpha;-tocopherol degradation	Group 1	0	0	0	0	0	0	0	0	0	0	0	0	0	0	0	0	0	0	0	0	0	0	0	0	0	0	0	0	0	0	0	0	0	0	0	0	0	0	0	0	0	0	0	0	0	0	0	0
mono-trans, poly-cis decaprenyl phosphate biosynthesis	Group 1	0	0	0	0	0	0	0	0	0	0	0	0	0	0	0	0	0	0	0	0	0	0	0	0	0	0	0	0	0	0	0	0	0	0	0	0	0	0	0	0	0	0	0	0	0	0	0	0
mycolyl-arabinogalactan-peptidoglycan complex biosynthesis	Group 1	0	0	0	0	0	0	0	0	0	0	0	0	0	0	0	0	0	0	0	0	0	0	0	0	0	0	0	0	0	0	0	0	0	0	0	0	0	0	0	0	0	0	0	0	0	0	0	0
melatonin degradation I	Group 1	0	0	0	0	0	0	0	0	0	0	0	0	0	0	0	0	0	0	0	0	0	0	0	0	0	0	0	0	0	0	0	0	0	0	0	0	0	0	0	0	0	0	0	0	0	0	0	0
melatonin degradation II	Group 1	0	0	0	0	0	0	0	0	0	0	0	0	0	0	0	0	0	0	0	0	0	0	0	0	0	0	0	0	0	0	0	0	0	0	0	0	0	0	0	0	0	0	0	0	0	0	0	0
melatonin degradation III	Group 1	0	0	0	0	0	0	0	0	0	0	0	0	0	0	0	0	0	0	0	0	0	0	0	0	0	0	0	0	0	0	0	0	0	0	0	0	0	0	0	0	0	0	0	0	0	0	0	0
hispidol and hispidol 4'-O-beta-D-glucoside biosynthesis	Group 1	0	0	0	0	0	0	0	0	0	0	0	0	0	0	0	0	0	0	0	0	0	0	0	0	0	0	0	0	0	0	0	0	0	0	0	0	0	0	0	0	0	0	0	0	0	0	0	0
carrageenan biosynthesis	Group 1	0	0	0	0	0	0	0	0	0	0	0	0	0	0	0	0	0	0	0	0	0	0	0	0	0	0	0	0	0	0	0	0	0	0	0	0	0	0	0	0	0	0	0	0	0	0	0	0
Rapoport-Luebering glycolytic shunt	Group 1	0	0	0	0	0	0	0	0	0	0	0	0	0	0	0	0	0	0	0	0	0	0	0	0	0	0	0	0	0	0	0	0	0	0	0	0	0	0	0	0	0	0	0	0	0	0	0	0
pyochelin biosynthesis	Group 1	0	0	0	0	0	0	0	0	0	0	0	0	0	0	0	0	0	0	0	0	0	0	0	0	0	0	0	0	0	0	0	0	0	0	0	0	0	0	0	0	0	0	0	0	0	0	0	0
ginsenoside degradation I	Group 1	0	0	0	0	0	0	0	0	0	0	0	0	0	0	0	0	0	0	0	0	0	0	0	0	0	0	0	0	0	0	0	0	0	0	0	0	0	0	0	0	0	0	0	0	0	0	0	0
ginsenoside degradation II	Group 1	0	0	0	0	0	0	0	0	0	0	0	0	0	0	0	0	0	0	0	0	0	0	0	0	0	0	0	0	0	0	0	0	0	0	0	0	0	0	0	0	0	0	0	0	0	0	0	0
L-ascorbate biosynthesis V (euglena, D-galacturonate pathway)	Group 1	0	0	0	0	0	0	0	0	0	0	0	0	0	0	0	0	0	0	0	0	0	0	0	0	0	0	0	0	0	0	0	0	0	0	0	0	0	0	0	0	0	0	0	0	0	0	0	0
4-hydroxycoumarin and dicoumarol biosynthesis	Group 1	0	0	0	0	0	0	0	0	0	0	0	0	0	0	0	0	0	0	0	0	0	0	0	0	0	0	0	0	0	0	0	0	0	0	0	0	0	0	0	0	0	0	0	0	0	0	0	0
proanthocyanidins biosynthesis from flavanols	Group 1	0	0	0	0	0	0	0	0	0	0	0	0	0	0	0	0	0	0	0	0	0	0	0	0	0	0	0	0	0	0	0	0	0	0	0	0	0	0	0	0	0	0	0	0	0	0	0	0
pyrroloquinoline quinone biosynthesis	Group 1	0	0	0	0	0	0	0	0	0	0	0	0	0	0	0	0	0	0	0	0	0	0	0	0	0	0	0	0	0	0	0	0	0	0	0	0	0	0	0	0	0	0	0	0	0	0	0	0
arsenate detoxification IV (mycothiol)	Group 1	0	0	0	0	0	0	0	0	0	0	0	0	0	0	0	0	0	0	0	0	0	0	0	0	0	0	0	0	0	0	0	0	0	0	0	0	0	0	0	0	0	0	0	0	0	0	0	0
hemoglobin degradation	Group 1	0	0	0	0	0	0	0	0	0	0	0	0	0	0	0	0	0	0	0	0	0	0	0	0	0	0	0	0	0	0	0	0	0	0	0	0	0	0	0	0	0	0	0	0	0	0	0	0
rotenoid biosynthesis II	Group 1	0	0	0	0	0	0	0	0	0	0	0	0	0	0	0	0	0	0	0	0	0	0	0	0	0	0	0	0	0	0	0	0	0	0	0	0	0	0	0	0	0	0	0	0	0	0	0	0
uracil degradation II (oxidative)	Group 1	0	0	0	0	0	0	0	0	0	0	0	0	0	0	0	0	0	0	0	0	0	0	0	0	0	0	0	0	0	0	0	0	0	0	0	0	0	0	0	0	0	0	0	0	0	0	0	0
rot-2'-enonate biosynthesis	Group 1	0	0	0	0	0	0	0	0	0	0	0	0	0	0	0	0	0	0	0	0	0	0	0	0	0	0	0	0	0	0	0	0	0	0	0	0	0	0	0	0	0	0	0	0	0	0	0	0
4-hydroxybenzoate biosynthesis IV (plants)	Group 1	0	0	0	0	0	0	0	0	0	0	0	0	0	0	0	0	0	0	0	0	0	0	0	0	0	0	0	0	0	0	0	0	0	0	0	0	0	0	0	0	0	0	0	0	0	0	0	0
curcuminoid biosynthesis	Group 1	0	0	0	0	0	0	0	0	0	0	0	0	0	0	0	0	0	0	0	0	0	0	0	0	0	0	0	0	0	0	0	0	0	0	0	0	0	0	0	0	0	0	0	0	0	0	0	0
hydroxylated fatty acid biosynthesis (plants)	Group 1	0	0	0	0	0	0	0	0	0	0	0	0	0	0	0	0	0	0	0	0	0	0	0	0	0	0	0	0	0	0	0	0	0	0	0	0	0	0	0	0	0	0	0	0	0	0	0	0
perillyl aldehyde biosynthesis	Group 1	0	0	0	0	0	0	0	0	0	0	0	0	0	0	0	0	0	0	0	0	0	0	0	0	0	0	0	0	0	0	0	0	0	0	0	0	0	0	0	0	0	0	0	0	0	0	0	0
fenchol biosynthesis I	Group 1	0	0	0	0	0	0	0	0	0	0	0	0	0	0	0	0	0	0	0	0	0	0	0	0	0	0	0	0	0	0	0	0	0	0	0	0	0	0	0	0	0	0	0	0	0	0	0	0
phenylphenalenone biosynthesis	Group 1	0	0	0	0	0	0	0	0	0	0	0	0	0	0	0	0	0	0	0	0	0	0	0	0	0	0	0	0	0	0	0	0	0	0	0	0	0	0	0	0	0	0	0	0	0	0	0	0
spermine and spermidine degradation III	Group 1	0	0	0	0	0	0	0	0	0	0	0	0	0	0	0	0	0	0	0	0	0	0	0	0	0	0	0	0	0	0	0	0	0	0	0	0	0	0	0	0	0	0	0	0	0	0	0	0
spermidine hydroxycinnamic acid conjugates biosynthesis	Group 1	0	0	0	0	0	0	0	0	0	0	0	0	0	0	0	0	0	0	0	0	0	0	0	0	0	0	0	0	0	0	0	0	0	0	0	0	0	0	0	0	0	0	0	0	0	0	0	0
benzoate biosynthesis II (CoA-independent, non-beta-oxidative)	Group 1	0	0	0	0	0	0	0	0	0	0	0	0	0	0	0	0	0	0	0	0	0	0	0	0	0	0	0	0	0	0	0	0	0	0	0	0	0	0	0	0	0	0	0	0	0	0	0	0
fenchol biosynthesis II	Group 1	0	0	0	0	0	0	0	0	0	0	0	0	0	0	0	0	0	0	0	0	0	0	0	0	0	0	0	0	0	0	0	0	0	0	0	0	0	0	0	0	0	0	0	0	0	0	0	0
trichome monoterpenes biosynthesis	Group 1	0	0	0	0	0	0	0	0	0	0	0	0	0	0	0	0	0	0	0	0	0	0	0	0	0	0	0	0	0	0	0	0	0	0	0	0	0	0	0	0	0	0	0	0	0	0	0	0
hordatine biosynthesis	Group 1	0	0	0	0	0	0	0	0	0	0	0	0	0	0	0	0	0	0	0	0	0	0	0	0	0	0	0	0	0	0	0	0	0	0	0	0	0	0	0	0	0	0	0	0	0	0	0	0
fenchone biosynthesis	Group 1	0	0	0	0	0	0	0	0	0	0	0	0	0	0	0	0	0	0	0	0	0	0	0	0	0	0	0	0	0	0	0	0	0	0	0	0	0	0	0	0	0	0	0	0	0	0	0	0
3-carene biosynthesis	Group 1	0	0	0	0	0	0	0	0	0	0	0	0	0	0	0	0	0	0	0	0	0	0	0	0	0	0	0	0	0	0	0	0	0	0	0	0	0	0	0	0	0	0	0	0	0	0	0	0
stigma estolide biosynthesis	Group 1	0	0	0	0	0	0	0	0	0	0	0	0	0	0	0	0	0	0	0	0	0	0	0	0	0	0	0	0	0	0	0	0	0	0	0	0	0	0	0	0	0	0	0	0	0	0	0	0
serinol biosynthesis	Group 1	0	0	0	0	0	0	0	0	0	0	0	0	0	0	0	0	0	0	0	0	0	0	0	0	0	0	0	0	0	0	0	0	0	0	0	0	0	0	0	0	0	0	0	0	0	0	0	0
benzoyl-CoA biosynthesis	Group 1	0	0	0	0	0	0	0	0	0	0	0	0	0	0	0	0	0	0	0	0	0	0	0	0	0	0	0	0	0	0	0	0	0	0	0	0	0	0	0	0	0	0	0	0	0	0	0	0
peptidoglycan cross-bridge biosynthesis I (S. aureus)	Group 1	0	0	0	0	0	0	0	0	0	0	0	0	0	0	0	0	0	0	0	0	0	0	0	0	0	0	0	0	0	0	0	0	0	0	0	0	0	0	0	0	0	0	0	0	0	0	0	0
peptidoglycan cross-bridge biosynthesis III (Enterococcus faecalis)	Group 1	0	0	0	0	0	0	0	0	0	0	0	0	0	0	0	0	0	0	0	0	0	0	0	0	0	0	0	0	0	0	0	0	0	0	0	0	0	0	0	0	0	0	0	0	0	0	0	0
peptidoglycan cross-bridge biosynthesis IV (Weissella viridescens)	Group 1	0	0	0	0	0	0	0	0	0	0	0	0	0	0	0	0	0	0	0	0	0	0	0	0	0	0	0	0	0	0	0	0	0	0	0	0	0	0	0	0	0	0	0	0	0	0	0	0
polyvinyl alcohol degradation	Group 1	0	0	0	0	0	0	0	0	0	0	0	0	0	0	0	0	0	0	0	0	0	0	0	0	0	0	0	0	0	0	0	0	0	0	0	0	0	0	0	0	0	0	0	0	0	0	0	0
trans-lycopene biosynthesis II (oxygenic phototrophs and green sulfur bacteria)	Group 1	0	0	0	0	0	0	0	0	0	0	0	0	0	0	0	0	0	0	0	0	0	0	0	0	0	0	0	0	0	0	0	0	0	0	0	0	0	0	0	0	0	0	0	0	0	0	0	0
gibberellin inactivation II (methylation)	Group 1	0	0	0	0	0	0	0	0	0	0	0	0	0	0	0	0	0	0	0	0	0	0	0	0	0	0	0	0	0	0	0	0	0	0	0	0	0	0	0	0	0	0	0	0	0	0	0	0
GDP-D-glycero-&alpha;-D-manno-heptose biosynthesis	Group 1	0	0	0	0	0	0	0	0	0	0	0	0	0	0	0	0	0	0	0	0	0	0	0	0	0	0	0	0	0	0	0	0	0	0	0	0	0	0	0	0	0	0	0	0	0	0	0	0
diphthamide biosynthesis I (archaea)	Group 1	0	0	0	0	0	0	0	0	0	0	0	0	0	0	0	0	0	0	0	0	0	0	0	0	0	0	0	0	0	0	0	0	0	0	0	0	0	0	0	0	0	0	0	0	0	0	0	0
ceramide degradation (generic)	Group 1	0	0	0	0	0	0	0	0	0	0	0	0	0	0	0	0	0	0	0	0	0	0	0	0	0	0	0	0	0	0	0	0	0	0	0	0	0	0	0	0	0	0	0	0	0	0	0	0
D-galacturonate degradation III	Group 1	0	0	0	0	0	0	0	0	0	0	0	0	0	0	0	0	0	0	0	0	0	0	0	0	0	0	0	0	0	0	0	0	0	0	0	0	0	0	0	0	0	0	0	0	0	0	0	0
chanoclavine I aldehyde biosynthesis	Group 1	0	0	0	0	0	0	0	0	0	0	0	0	0	0	0	0	0	0	0	0	0	0	0	0	0	0	0	0	0	0	0	0	0	0	0	0	0	0	0	0	0	0	0	0	0	0	0	0
gibberellin inactivation III (epoxidation)	Group 1	0	0	0	0	0	0	0	0	0	0	0	0	0	0	0	0	0	0	0	0	0	0	0	0	0	0	0	0	0	0	0	0	0	0	0	0	0	0	0	0	0	0	0	0	0	0	0	0
ergotamine biosynthesis	Group 1	0	0	0	0	0	0	0	0	0	0	0	0	0	0	0	0	0	0	0	0	0	0	0	0	0	0	0	0	0	0	0	0	0	0	0	0	0	0	0	0	0	0	0	0	0	0	0	0
eumelanin biosynthesis	Group 1	0	0	0	0	0	0	0	0	0	0	0	0	0	0	0	0	0	0	0	0	0	0	0	0	0	0	0	0	0	0	0	0	0	0	0	0	0	0	0	0	0	0	0	0	0	0	0	0
methanol oxidation to formaldehyde II	Group 1	0	0	0	0	0	0	0	0	0	0	0	0	0	0	0	0	0	0	0	0	0	0	0	0	0	0	0	0	0	0	0	0	0	0	0	0	0	0	0	0	0	0	0	0	0	0	0	0
3-methylarginine biosynthesis	Group 1	0	0	0	0	0	0	0	0	0	0	0	0	0	0	0	0	0	0	0	0	0	0	0	0	0	0	0	0	0	0	0	0	0	0	0	0	0	0	0	0	0	0	0	0	0	0	0	0
hydrogen oxidation III (anaerobic, NADP)	Group 1	0	0	0	0	0	0	0	0	0	0	0	0	0	0	0	0	0	0	0	0	0	0	0	0	0	0	0	0	0	0	0	0	0	0	0	0	0	0	0	0	0	0	0	0	0	0	0	0
phloridzin biosynthesis	Group 1	0	0	0	0	0	0	0	0	0	0	0	0	0	0	0	0	0	0	0	0	0	0	0	0	0	0	0	0	0	0	0	0	0	0	0	0	0	0	0	0	0	0	0	0	0	0	0	0
bile acids epimerization	Group 1	0	0	0	0	0	0	0	0	0	0	0	0	0	0	0	0	0	0	0	0	0	0	0	0	0	0	0	0	0	0	0	0	0	0	0	0	0	0	0	0	0	0	0	0	0	0	0	0
nonaprenyl diphosphate biosynthesis II	Group 1	0	0	0	0	0	0	0	0	0	0	0	0	0	0	0	0	0	0	0	0	0	0	0	0	0	0	0	0	0	0	0	0	0	0	0	0	0	0	0	0	0	0	0	0	0	0	0	0
nitrite-dependent anaerobic methane oxidation	Group 1	0	0	0	0	0	0	0	0	0	0	0	0	0	0	0	0	0	0	0	0	0	0	0	0	0	0	0	0	0	0	0	0	0	0	0	0	0	0	0	0	0	0	0	0	0	0	0	0
lychnose and isolychnose biosynthesis	Group 1	0	0	0	0	0	0	0	0	0	0	0	0	0	0	0	0	0	0	0	0	0	0	0	0	0	0	0	0	0	0	0	0	0	0	0	0	0	0	0	0	0	0	0	0	0	0	0	0
stellariose and mediose biosynthesis	Group 1	0	0	0	0	0	0	0	0	0	0	0	0	0	0	0	0	0	0	0	0	0	0	0	0	0	0	0	0	0	0	0	0	0	0	0	0	0	0	0	0	0	0	0	0	0	0	0	0
limonene degradation III (to perillate)	Group 1	0	0	0	0	0	0	0	0	0	0	0	0	0	0	0	0	0	0	0	0	0	0	0	0	0	0	0	0	0	0	0	0	0	0	0	0	0	0	0	0	0	0	0	0	0	0	0	0
chlorate reduction	Group 1	0	0	0	0	0	0	0	0	0	0	0	0	0	0	0	0	0	0	0	0	0	0	0	0	0	0	0	0	0	0	0	0	0	0	0	0	0	0	0	0	0	0	0	0	0	0	0	0
perchlorate reduction	Group 1	0	0	0	0	0	0	0	0	0	0	0	0	0	0	0	0	0	0	0	0	0	0	0	0	0	0	0	0	0	0	0	0	0	0	0	0	0	0	0	0	0	0	0	0	0	0	0	0
aniline degradation	Group 1	0	0	0	0	0	0	0	0	0	0	0	0	0	0	0	0	0	0	0	0	0	0	0	0	0	0	0	0	0	0	0	0	0	0	0	0	0	0	0	0	0	0	0	0	0	0	0	0
caffeine degradation III (bacteria, via demethylation)	Group 1	0	0	0	0	0	0	0	0	0	0	0	0	0	0	0	0	0	0	0	0	0	0	0	0	0	0	0	0	0	0	0	0	0	0	0	0	0	0	0	0	0	0	0	0	0	0	0	0
(Z)-phenylmethanethial S-oxide biosynthesis	Group 1	0	0	0	0	0	0	0	0	0	0	0	0	0	0	0	0	0	0	0	0	0	0	0	0	0	0	0	0	0	0	0	0	0	0	0	0	0	0	0	0	0	0	0	0	0	0	0	0
costunolide biosynthesis	Group 1	0	0	0	0	0	0	0	0	0	0	0	0	0	0	0	0	0	0	0	0	0	0	0	0	0	0	0	0	0	0	0	0	0	0	0	0	0	0	0	0	0	0	0	0	0	0	0	0
pyrimidine deoxyribonucleotides de novo biosynthesis III	Group 1	0	0	0	0	0	0	0	0	0	0	0	0	0	0	0	0	0	0	0	0	0	0	0	0	0	0	0	0	0	0	0	0	0	0	0	0	0	0	0	0	0	0	0	0	0	0	0	0
brassinosteroids inactivation	Group 1	0	0	0	0	0	0	0	0	0	0	0	0	0	0	0	0	0	0	0	0	0	0	0	0	0	0	0	0	0	0	0	0	0	0	0	0	0	0	0	0	0	0	0	0	0	0	0	0
carbazole degradation	Group 1	0	0	0	0	0	0	0	0	0	0	0	0	0	0	0	0	0	0	0	0	0	0	0	0	0	0	0	0	0	0	0	0	0	0	0	0	0	0	0	0	0	0	0	0	0	0	0	0
caffeine degradation I (main, plants)	Group 1	0	0	0	0	0	0	0	0	0	0	0	0	0	0	0	0	0	0	0	0	0	0	0	0	0	0	0	0	0	0	0	0	0	0	0	0	0	0	0	0	0	0	0	0	0	0	0	0
caffeine degradation II	Group 1	0	0	0	0	0	0	0	0	0	0	0	0	0	0	0	0	0	0	0	0	0	0	0	0	0	0	0	0	0	0	0	0	0	0	0	0	0	0	0	0	0	0	0	0	0	0	0	0
1D-myo-inositol hexakisphosphate biosynthesis V (from Ins(1,3,4)P3)	Group 1	0	0	0	0	0	0	0	0	0	0	0	0	0	0	0	0	0	0	0	0	0	0	0	0	0	0	0	0	0	0	0	0	0	0	0	0	0	0	0	0	0	0	0	0	0	0	0	0
glycosaminoglycan-protein linkage region biosynthesis	Group 1	0	0	0	0	0	0	0	0	0	0	0	0	0	0	0	0	0	0	0	0	0	0	0	0	0	0	0	0	0	0	0	0	0	0	0	0	0	0	0	0	0	0	0	0	0	0	0	0
heparan sulfate biosynthesis (late stages)	Group 1	0	0	0	0	0	0	0	0	0	0	0	0	0	0	0	0	0	0	0	0	0	0	0	0	0	0	0	0	0	0	0	0	0	0	0	0	0	0	0	0	0	0	0	0	0	0	0	0
norspermidine biosynthesis	Group 1	0	0	0	0	0	0	0	0	0	0	0	0	0	0	0	0	0	0	0	0	0	0	0	0	0	0	0	0	0	0	0	0	0	0	0	0	0	0	0	0	0	0	0	0	0	0	0	0
chondroitin biosynthesis	Group 1	0	0	0	0	0	0	0	0	0	0	0	0	0	0	0	0	0	0	0	0	0	0	0	0	0	0	0	0	0	0	0	0	0	0	0	0	0	0	0	0	0	0	0	0	0	0	0	0
chondroitin sulfate biosynthesis (late stages)	Group 1	0	0	0	0	0	0	0	0	0	0	0	0	0	0	0	0	0	0	0	0	0	0	0	0	0	0	0	0	0	0	0	0	0	0	0	0	0	0	0	0	0	0	0	0	0	0	0	0
dermatan sulfate biosynthesis (late stages)	Group 1	0	0	0	0	0	0	0	0	0	0	0	0	0	0	0	0	0	0	0	0	0	0	0	0	0	0	0	0	0	0	0	0	0	0	0	0	0	0	0	0	0	0	0	0	0	0	0	0
chondroitin sulfate degradation I (bacterial)	Group 1	0	0	0	0	0	0	0	0	0	0	0	0	0	0	0	0	0	0	0	0	0	0	0	0	0	0	0	0	0	0	0	0	0	0	0	0	0	0	0	0	0	0	0	0	0	0	0	0
chondroitin sulfate degradation (metazoa)	Group 1	0	0	0	0	0	0	0	0	0	0	0	0	0	0	0	0	0	0	0	0	0	0	0	0	0	0	0	0	0	0	0	0	0	0	0	0	0	0	0	0	0	0	0	0	0	0	0	0
achromobactin biosynthesis	Group 1	0	0	0	0	0	0	0	0	0	0	0	0	0	0	0	0	0	0	0	0	0	0	0	0	0	0	0	0	0	0	0	0	0	0	0	0	0	0	0	0	0	0	0	0	0	0	0	0
juvenile hormone III biosynthesis I	Group 1	0	0	0	0	0	0	0	0	0	0	0	0	0	0	0	0	0	0	0	0	0	0	0	0	0	0	0	0	0	0	0	0	0	0	0	0	0	0	0	0	0	0	0	0	0	0	0	0
dermatan sulfate degradation (metazoa)	Group 1	0	0	0	0	0	0	0	0	0	0	0	0	0	0	0	0	0	0	0	0	0	0	0	0	0	0	0	0	0	0	0	0	0	0	0	0	0	0	0	0	0	0	0	0	0	0	0	0
farnesylcysteine salvage pathway	Group 1	0	0	0	0	0	0	0	0	0	0	0	0	0	0	0	0	0	0	0	0	0	0	0	0	0	0	0	0	0	0	0	0	0	0	0	0	0	0	0	0	0	0	0	0	0	0	0	0
phosphatidylinositol biosynthesis I (bacteria)	Group 1	0	0	0	0	0	0	0	0	0	0	0	0	0	0	0	0	0	0	0	0	0	0	0	0	0	0	0	0	0	0	0	0	0	0	0	0	0	0	0	0	0	0	0	0	0	0	0	0
spirilloxanthin and 2,2'-diketo-spirilloxanthin biosynthesis	Group 1	0	0	0	0	0	0	0	0	0	0	0	0	0	0	0	0	0	0	0	0	0	0	0	0	0	0	0	0	0	0	0	0	0	0	0	0	0	0	0	0	0	0	0	0	0	0	0	0
2-methylketone biosynthesis	Group 1	0	0	0	0	0	0	0	0	0	0	0	0	0	0	0	0	0	0	0	0	0	0	0	0	0	0	0	0	0	0	0	0	0	0	0	0	0	0	0	0	0	0	0	0	0	0	0	0
pyruvate fermentation to ethanol III	Group 1	0	0	0	0	0	0	0	0	0	0	0	0	0	0	0	0	0	0	0	0	0	0	0	0	0	0	0	0	0	0	0	0	0	0	0	0	0	0	0	0	0	0	0	0	0	0	0	0
pyruvate fermentation to acetone	Group 1	0	0	0	0	0	0	0	0	0	0	0	0	0	0	0	0	0	0	0	0	0	0	0	0	0	0	0	0	0	0	0	0	0	0	0	0	0	0	0	0	0	0	0	0	0	0	0	0
manganese oxidation I	Group 1	0	0	0	0	0	0	0	0	0	0	0	0	0	0	0	0	0	0	0	0	0	0	0	0	0	0	0	0	0	0	0	0	0	0	0	0	0	0	0	0	0	0	0	0	0	0	0	0
sciadonate biosynthesis	Group 1	0	0	0	0	0	0	0	0	0	0	0	0	0	0	0	0	0	0	0	0	0	0	0	0	0	0	0	0	0	0	0	0	0	0	0	0	0	0	0	0	0	0	0	0	0	0	0	0
guanine and guanosine salvage II	Group 1	0	0	0	0	0	0	0	0	0	0	0	0	0	0	0	0	0	0	0	0	0	0	0	0	0	0	0	0	0	0	0	0	0	0	0	0	0	0	0	0	0	0	0	0	0	0	0	0
naringenin C-glucosylation	Group 1	0	0	0	0	0	0	0	0	0	0	0	0	0	0	0	0	0	0	0	0	0	0	0	0	0	0	0	0	0	0	0	0	0	0	0	0	0	0	0	0	0	0	0	0	0	0	0	0
dicranin biosynthesis	Group 1	0	0	0	0	0	0	0	0	0	0	0	0	0	0	0	0	0	0	0	0	0	0	0	0	0	0	0	0	0	0	0	0	0	0	0	0	0	0	0	0	0	0	0	0	0	0	0	0
sulfolactate degradation I	Group 1	0	0	0	0	0	0	0	0	0	0	0	0	0	0	0	0	0	0	0	0	0	0	0	0	0	0	0	0	0	0	0	0	0	0	0	0	0	0	0	0	0	0	0	0	0	0	0	0
nicotine degradation IV	Group 1	0	0	0	0	0	0	0	0	0	0	0	0	0	0	0	0	0	0	0	0	0	0	0	0	0	0	0	0	0	0	0	0	0	0	0	0	0	0	0	0	0	0	0	0	0	0	0	0
nicotine degradation V	Group 1	0	0	0	0	0	0	0	0	0	0	0	0	0	0	0	0	0	0	0	0	0	0	0	0	0	0	0	0	0	0	0	0	0	0	0	0	0	0	0	0	0	0	0	0	0	0	0	0
heptadecane biosynthesis	Group 1	0	0	0	0	0	0	0	0	0	0	0	0	0	0	0	0	0	0	0	0	0	0	0	0	0	0	0	0	0	0	0	0	0	0	0	0	0	0	0	0	0	0	0	0	0	0	0	0
salicylate glucosides biosynthesis II	Group 1	0	0	0	0	0	0	0	0	0	0	0	0	0	0	0	0	0	0	0	0	0	0	0	0	0	0	0	0	0	0	0	0	0	0	0	0	0	0	0	0	0	0	0	0	0	0	0	0
bupropion degradation	Group 1	0	0	0	0	0	0	0	0	0	0	0	0	0	0	0	0	0	0	0	0	0	0	0	0	0	0	0	0	0	0	0	0	0	0	0	0	0	0	0	0	0	0	0	0	0	0	0	0
salicylate glucosides biosynthesis III	Group 1	0	0	0	0	0	0	0	0	0	0	0	0	0	0	0	0	0	0	0	0	0	0	0	0	0	0	0	0	0	0	0	0	0	0	0	0	0	0	0	0	0	0	0	0	0	0	0	0
cytidine-5'-diphosphate-glycerol biosynthesis	Group 1	0	0	0	0	0	0	0	0	0	0	0	0	0	0	0	0	0	0	0	0	0	0	0	0	0	0	0	0	0	0	0	0	0	0	0	0	0	0	0	0	0	0	0	0	0	0	0	0
salinosporamide A biosynthesis	Group 1	0	0	0	0	0	0	0	0	0	0	0	0	0	0	0	0	0	0	0	0	0	0	0	0	0	0	0	0	0	0	0	0	0	0	0	0	0	0	0	0	0	0	0	0	0	0	0	0
catecholamine biosynthesis	Group 1	0	0	0	0	0	0	0	0	0	0	0	0	0	0	0	0	0	0	0	0	0	0	0	0	0	0	0	0	0	0	0	0	0	0	0	0	0	0	0	0	0	0	0	0	0	0	0	0
tricetin methylation	Group 1	0	0	0	0	0	0	0	0	0	0	0	0	0	0	0	0	0	0	0	0	0	0	0	0	0	0	0	0	0	0	0	0	0	0	0	0	0	0	0	0	0	0	0	0	0	0	0	0
caffeine degradation V (bacteria, via trimethylurate)	Group 1	0	0	0	0	0	0	0	0	0	0	0	0	0	0	0	0	0	0	0	0	0	0	0	0	0	0	0	0	0	0	0	0	0	0	0	0	0	0	0	0	0	0	0	0	0	0	0	0
3-sulfopropanediol degradation	Group 1	0	0	0	0	0	0	0	0	0	0	0	0	0	0	0	0	0	0	0	0	0	0	0	0	0	0	0	0	0	0	0	0	0	0	0	0	0	0	0	0	0	0	0	0	0	0	0	0
salicylate degradation III	Group 1	0	0	0	0	0	0	0	0	0	0	0	0	0	0	0	0	0	0	0	0	0	0	0	0	0	0	0	0	0	0	0	0	0	0	0	0	0	0	0	0	0	0	0	0	0	0	0	0
C20 prostanoid biosynthesis	Group 1	0	0	0	0	0	0	0	0	0	0	0	0	0	0	0	0	0	0	0	0	0	0	0	0	0	0	0	0	0	0	0	0	0	0	0	0	0	0	0	0	0	0	0	0	0	0	0	0
leukotriene biosynthesis	Group 1	0	0	0	0	0	0	0	0	0	0	0	0	0	0	0	0	0	0	0	0	0	0	0	0	0	0	0	0	0	0	0	0	0	0	0	0	0	0	0	0	0	0	0	0	0	0	0	0
pregnenolone biosynthesis	Group 1	0	0	0	0	0	0	0	0	0	0	0	0	0	0	0	0	0	0	0	0	0	0	0	0	0	0	0	0	0	0	0	0	0	0	0	0	0	0	0	0	0	0	0	0	0	0	0	0
androgen biosynthesis	Group 1	0	0	0	0	0	0	0	0	0	0	0	0	0	0	0	0	0	0	0	0	0	0	0	0	0	0	0	0	0	0	0	0	0	0	0	0	0	0	0	0	0	0	0	0	0	0	0	0
estradiol biosynthesis I (via estrone)	Group 1	0	0	0	0	0	0	0	0	0	0	0	0	0	0	0	0	0	0	0	0	0	0	0	0	0	0	0	0	0	0	0	0	0	0	0	0	0	0	0	0	0	0	0	0	0	0	0	0
glucocorticoid biosynthesis	Group 1	0	0	0	0	0	0	0	0	0	0	0	0	0	0	0	0	0	0	0	0	0	0	0	0	0	0	0	0	0	0	0	0	0	0	0	0	0	0	0	0	0	0	0	0	0	0	0	0
mineralocorticoid biosynthesis	Group 1	0	0	0	0	0	0	0	0	0	0	0	0	0	0	0	0	0	0	0	0	0	0	0	0	0	0	0	0	0	0	0	0	0	0	0	0	0	0	0	0	0	0	0	0	0	0	0	0
3-methyl-branched fatty acid &alpha;-oxidation	Group 1	0	0	0	0	0	0	0	0	0	0	0	0	0	0	0	0	0	0	0	0	0	0	0	0	0	0	0	0	0	0	0	0	0	0	0	0	0	0	0	0	0	0	0	0	0	0	0	0
ceramide degradation by &alpha;-oxidation	Group 1	0	0	0	0	0	0	0	0	0	0	0	0	0	0	0	0	0	0	0	0	0	0	0	0	0	0	0	0	0	0	0	0	0	0	0	0	0	0	0	0	0	0	0	0	0	0	0	0
lipoxin biosynthesis	Group 1	0	0	0	0	0	0	0	0	0	0	0	0	0	0	0	0	0	0	0	0	0	0	0	0	0	0	0	0	0	0	0	0	0	0	0	0	0	0	0	0	0	0	0	0	0	0	0	0
15-epi-lipoxin biosynthesis	Group 1	0	0	0	0	0	0	0	0	0	0	0	0	0	0	0	0	0	0	0	0	0	0	0	0	0	0	0	0	0	0	0	0	0	0	0	0	0	0	0	0	0	0	0	0	0	0	0	0
aspirin triggered resolvin E biosynthesis	Group 1	0	0	0	0	0	0	0	0	0	0	0	0	0	0	0	0	0	0	0	0	0	0	0	0	0	0	0	0	0	0	0	0	0	0	0	0	0	0	0	0	0	0	0	0	0	0	0	0
aspirin triggered resolvin D biosynthesis	Group 1	0	0	0	0	0	0	0	0	0	0	0	0	0	0	0	0	0	0	0	0	0	0	0	0	0	0	0	0	0	0	0	0	0	0	0	0	0	0	0	0	0	0	0	0	0	0	0	0
resolvin D biosynthesis	Group 1	0	0	0	0	0	0	0	0	0	0	0	0	0	0	0	0	0	0	0	0	0	0	0	0	0	0	0	0	0	0	0	0	0	0	0	0	0	0	0	0	0	0	0	0	0	0	0	0
carnosine biosynthesis	Group 1	0	0	0	0	0	0	0	0	0	0	0	0	0	0	0	0	0	0	0	0	0	0	0	0	0	0	0	0	0	0	0	0	0	0	0	0	0	0	0	0	0	0	0	0	0	0	0	0
homocarnosine biosynthesis	Group 1	0	0	0	0	0	0	0	0	0	0	0	0	0	0	0	0	0	0	0	0	0	0	0	0	0	0	0	0	0	0	0	0	0	0	0	0	0	0	0	0	0	0	0	0	0	0	0	0
fructose 2,6-bisphosphate biosynthesis	Group 1	0	0	0	0	0	0	0	0	0	0	0	0	0	0	0	0	0	0	0	0	0	0	0	0	0	0	0	0	0	0	0	0	0	0	0	0	0	0	0	0	0	0	0	0	0	0	0	0
L-lysine degradation II (L-pipecolate pathway)	Group 1	0	0	0	0	0	0	0	0	0	0	0	0	0	0	0	0	0	0	0	0	0	0	0	0	0	0	0	0	0	0	0	0	0	0	0	0	0	0	0	0	0	0	0	0	0	0	0	0
(R)-cysteate degradation	Group 1	0	0	0	0	0	0	0	0	0	0	0	0	0	0	0	0	0	0	0	0	0	0	0	0	0	0	0	0	0	0	0	0	0	0	0	0	0	0	0	0	0	0	0	0	0	0	0	0
coenzyme M biosynthesis II	Group 1	0	0	0	0	0	0	0	0	0	0	0	0	0	0	0	0	0	0	0	0	0	0	0	0	0	0	0	0	0	0	0	0	0	0	0	0	0	0	0	0	0	0	0	0	0	0	0	0
fluoroacetate and fluorothreonine biosynthesis	Group 1	0	0	0	0	0	0	0	0	0	0	0	0	0	0	0	0	0	0	0	0	0	0	0	0	0	0	0	0	0	0	0	0	0	0	0	0	0	0	0	0	0	0	0	0	0	0	0	0
labdane-type diterpenes biosynthesis	Group 1	0	0	0	0	0	0	0	0	0	0	0	0	0	0	0	0	0	0	0	0	0	0	0	0	0	0	0	0	0	0	0	0	0	0	0	0	0	0	0	0	0	0	0	0	0	0	0	0
rhamnolipid biosynthesis	Group 1	0	0	0	0	0	0	0	0	0	0	0	0	0	0	0	0	0	0	0	0	0	0	0	0	0	0	0	0	0	0	0	0	0	0	0	0	0	0	0	0	0	0	0	0	0	0	0	0
glycolate and glyoxylate degradation III	Group 1	0	0	0	0	0	0	0	0	0	0	0	0	0	0	0	0	0	0	0	0	0	0	0	0	0	0	0	0	0	0	0	0	0	0	0	0	0	0	0	0	0	0	0	0	0	0	0	0
juvenile hormone III biosynthesis II	Group 1	0	0	0	0	0	0	0	0	0	0	0	0	0	0	0	0	0	0	0	0	0	0	0	0	0	0	0	0	0	0	0	0	0	0	0	0	0	0	0	0	0	0	0	0	0	0	0	0
ent -kaurene biosynthesis II	Group 1	0	0	0	0	0	0	0	0	0	0	0	0	0	0	0	0	0	0	0	0	0	0	0	0	0	0	0	0	0	0	0	0	0	0	0	0	0	0	0	0	0	0	0	0	0	0	0	0
xanthan biosynthesis	Group 1	0	0	0	0	0	0	0	0	0	0	0	0	0	0	0	0	0	0	0	0	0	0	0	0	0	0	0	0	0	0	0	0	0	0	0	0	0	0	0	0	0	0	0	0	0	0	0	0
acetan biosynthesis	Group 1	0	0	0	0	0	0	0	0	0	0	0	0	0	0	0	0	0	0	0	0	0	0	0	0	0	0	0	0	0	0	0	0	0	0	0	0	0	0	0	0	0	0	0	0	0	0	0	0
fusicoccin A biosynthesis	Group 1	0	0	0	0	0	0	0	0	0	0	0	0	0	0	0	0	0	0	0	0	0	0	0	0	0	0	0	0	0	0	0	0	0	0	0	0	0	0	0	0	0	0	0	0	0	0	0	0
2-heptyl-3-hydroxy-4(1H)-quinolone biosynthesis	Group 1	0	0	0	0	0	0	0	0	0	0	0	0	0	0	0	0	0	0	0	0	0	0	0	0	0	0	0	0	0	0	0	0	0	0	0	0	0	0	0	0	0	0	0	0	0	0	0	0
di-myo-inositol phosphate biosynthesis	Group 1	0	0	0	0	0	0	0	0	0	0	0	0	0	0	0	0	0	0	0	0	0	0	0	0	0	0	0	0	0	0	0	0	0	0	0	0	0	0	0	0	0	0	0	0	0	0	0	0
pterostilbene biosynthesis	Group 1	0	0	0	0	0	0	0	0	0	0	0	0	0	0	0	0	0	0	0	0	0	0	0	0	0	0	0	0	0	0	0	0	0	0	0	0	0	0	0	0	0	0	0	0	0	0	0	0
pyocyanin biosynthesis	Group 1	0	0	0	0	0	0	0	0	0	0	0	0	0	0	0	0	0	0	0	0	0	0	0	0	0	0	0	0	0	0	0	0	0	0	0	0	0	0	0	0	0	0	0	0	0	0	0	0
resveratrol degradation	Group 1	0	0	0	0	0	0	0	0	0	0	0	0	0	0	0	0	0	0	0	0	0	0	0	0	0	0	0	0	0	0	0	0	0	0	0	0	0	0	0	0	0	0	0	0	0	0	0	0
(E,E)-4,8,12-trimethyltrideca-1,3,7,11-tetraene biosynthesis	Group 1	0	0	0	0	0	0	0	0	0	0	0	0	0	0	0	0	0	0	0	0	0	0	0	0	0	0	0	0	0	0	0	0	0	0	0	0	0	0	0	0	0	0	0	0	0	0	0	0
delta-guaiene biosynthesis	Group 1	0	0	0	0	0	0	0	0	0	0	0	0	0	0	0	0	0	0	0	0	0	0	0	0	0	0	0	0	0	0	0	0	0	0	0	0	0	0	0	0	0	0	0	0	0	0	0	0
cis-geranyl-CoA degradation	Group 1	0	0	0	0	0	0	0	0	0	0	0	0	0	0	0	0	0	0	0	0	0	0	0	0	0	0	0	0	0	0	0	0	0	0	0	0	0	0	0	0	0	0	0	0	0	0	0	0
caffeoylglucarate biosynthesis	Group 1	0	0	0	0	0	0	0	0	0	0	0	0	0	0	0	0	0	0	0	0	0	0	0	0	0	0	0	0	0	0	0	0	0	0	0	0	0	0	0	0	0	0	0	0	0	0	0	0
sulfur oxidation IV (intracellular sulfur)	Group 1	0	0	0	0	0	0	0	0	0	0	0	0	0	0	0	0	0	0	0	0	0	0	0	0	0	0	0	0	0	0	0	0	0	0	0	0	0	0	0	0	0	0	0	0	0	0	0	0
thiosulfate oxidation IV (multienzyme complex)	Group 1	0	0	0	0	0	0	0	0	0	0	0	0	0	0	0	0	0	0	0	0	0	0	0	0	0	0	0	0	0	0	0	0	0	0	0	0	0	0	0	0	0	0	0	0	0	0	0	0
geraniol and nerol degradation	Group 1	0	0	0	0	0	0	0	0	0	0	0	0	0	0	0	0	0	0	0	0	0	0	0	0	0	0	0	0	0	0	0	0	0	0	0	0	0	0	0	0	0	0	0	0	0	0	0	0
jadomycin biosynthesis	Group 1	0	0	0	0	0	0	0	0	0	0	0	0	0	0	0	0	0	0	0	0	0	0	0	0	0	0	0	0	0	0	0	0	0	0	0	0	0	0	0	0	0	0	0	0	0	0	0	0
neurosporaxanthin biosynthesis	Group 1	0	0	0	0	0	0	0	0	0	0	0	0	0	0	0	0	0	0	0	0	0	0	0	0	0	0	0	0	0	0	0	0	0	0	0	0	0	0	0	0	0	0	0	0	0	0	0	0
dehydrophos biosynthesis	Group 1	0	0	0	0	0	0	0	0	0	0	0	0	0	0	0	0	0	0	0	0	0	0	0	0	0	0	0	0	0	0	0	0	0	0	0	0	0	0	0	0	0	0	0	0	0	0	0	0
aromatic glucosinolate activation	Group 1	0	0	0	0	0	0	0	0	0	0	0	0	0	0	0	0	0	0	0	0	0	0	0	0	0	0	0	0	0	0	0	0	0	0	0	0	0	0	0	0	0	0	0	0	0	0	0	0
glucosylglycerate biosynthesis II	Group 1	0	0	0	0	0	0	0	0	0	0	0	0	0	0	0	0	0	0	0	0	0	0	0	0	0	0	0	0	0	0	0	0	0	0	0	0	0	0	0	0	0	0	0	0	0	0	0	0
mannosylglucosylglycerate biosynthesis I	Group 1	0	0	0	0	0	0	0	0	0	0	0	0	0	0	0	0	0	0	0	0	0	0	0	0	0	0	0	0	0	0	0	0	0	0	0	0	0	0	0	0	0	0	0	0	0	0	0	0
mannosylglucosylglycerate biosynthesis II	Group 1	0	0	0	0	0	0	0	0	0	0	0	0	0	0	0	0	0	0	0	0	0	0	0	0	0	0	0	0	0	0	0	0	0	0	0	0	0	0	0	0	0	0	0	0	0	0	0	0
thyronamine and iodothyronamine metabolism	Group 1	0	0	0	0	0	0	0	0	0	0	0	0	0	0	0	0	0	0	0	0	0	0	0	0	0	0	0	0	0	0	0	0	0	0	0	0	0	0	0	0	0	0	0	0	0	0	0	0
plaunotol biosynthesis	Group 1	0	0	0	0	0	0	0	0	0	0	0	0	0	0	0	0	0	0	0	0	0	0	0	0	0	0	0	0	0	0	0	0	0	0	0	0	0	0	0	0	0	0	0	0	0	0	0	0
Fe(II) oxidation	Group 1	0	0	0	0	0	0	0	0	0	0	0	0	0	0	0	0	0	0	0	0	0	0	0	0	0	0	0	0	0	0	0	0	0	0	0	0	0	0	0	0	0	0	0	0	0	0	0	0
D-galactose degradation IV	Group 1	0	0	0	0	0	0	0	0	0	0	0	0	0	0	0	0	0	0	0	0	0	0	0	0	0	0	0	0	0	0	0	0	0	0	0	0	0	0	0	0	0	0	0	0	0	0	0	0
oxalate degradation I	Group 1	0	0	0	0	0	0	0	0	0	0	0	0	0	0	0	0	0	0	0	0	0	0	0	0	0	0	0	0	0	0	0	0	0	0	0	0	0	0	0	0	0	0	0	0	0	0	0	0
oxalate biosynthesis	Group 1	0	0	0	0	0	0	0	0	0	0	0	0	0	0	0	0	0	0	0	0	0	0	0	0	0	0	0	0	0	0	0	0	0	0	0	0	0	0	0	0	0	0	0	0	0	0	0	0
L-ascorbate degradation IV	Group 1	0	0	0	0	0	0	0	0	0	0	0	0	0	0	0	0	0	0	0	0	0	0	0	0	0	0	0	0	0	0	0	0	0	0	0	0	0	0	0	0	0	0	0	0	0	0	0	0
gallate biosynthesis	Group 1	0	0	0	0	0	0	0	0	0	0	0	0	0	0	0	0	0	0	0	0	0	0	0	0	0	0	0	0	0	0	0	0	0	0	0	0	0	0	0	0	0	0	0	0	0	0	0	0
poly-hydroxy fatty acids biosynthesis	Group 1	0	0	0	0	0	0	0	0	0	0	0	0	0	0	0	0	0	0	0	0	0	0	0	0	0	0	0	0	0	0	0	0	0	0	0	0	0	0	0	0	0	0	0	0	0	0	0	0
archaeosine biosynthesis I	Group 1	0	0	0	0	0	0	0	0	0	0	0	0	0	0	0	0	0	0	0	0	0	0	0	0	0	0	0	0	0	0	0	0	0	0	0	0	0	0	0	0	0	0	0	0	0	0	0	0
(1,4)-beta-D-xylan degradation	Group 1	0	0	0	0	0	0	0	0	0	0	0	0	0	0	0	0	0	0	0	0	0	0	0	0	0	0	0	0	0	0	0	0	0	0	0	0	0	0	0	0	0	0	0	0	0	0	0	0
toyocamycin biosynthesis	Group 1	0	0	0	0	0	0	0	0	0	0	0	0	0	0	0	0	0	0	0	0	0	0	0	0	0	0	0	0	0	0	0	0	0	0	0	0	0	0	0	0	0	0	0	0	0	0	0	0
sangivamycin biosynthesis	Group 1	0	0	0	0	0	0	0	0	0	0	0	0	0	0	0	0	0	0	0	0	0	0	0	0	0	0	0	0	0	0	0	0	0	0	0	0	0	0	0	0	0	0	0	0	0	0	0	0
candicidin biosynthesis	Group 1	0	0	0	0	0	0	0	0	0	0	0	0	0	0	0	0	0	0	0	0	0	0	0	0	0	0	0	0	0	0	0	0	0	0	0	0	0	0	0	0	0	0	0	0	0	0	0	0
starch degradation II	Group 1	0	0	0	0	0	0	0	0	0	0	0	0	0	0	0	0	0	0	0	0	0	0	0	0	0	0	0	0	0	0	0	0	0	0	0	0	0	0	0	0	0	0	0	0	0	0	0	0
methylaspartate cycle	Group 1	0	0	0	0	0	0	0	0	0	0	0	0	0	0	0	0	0	0	0	0	0	0	0	0	0	0	0	0	0	0	0	0	0	0	0	0	0	0	0	0	0	0	0	0	0	0	0	0
methylhalides biosynthesis (plants)	Group 1	0	0	0	0	0	0	0	0	0	0	0	0	0	0	0	0	0	0	0	0	0	0	0	0	0	0	0	0	0	0	0	0	0	0	0	0	0	0	0	0	0	0	0	0	0	0	0	0
starch degradation III	Group 1	0	0	0	0	0	0	0	0	0	0	0	0	0	0	0	0	0	0	0	0	0	0	0	0	0	0	0	0	0	0	0	0	0	0	0	0	0	0	0	0	0	0	0	0	0	0	0	0
sporopollenin precursors biosynthesis	Group 1	0	0	0	0	0	0	0	0	0	0	0	0	0	0	0	0	0	0	0	0	0	0	0	0	0	0	0	0	0	0	0	0	0	0	0	0	0	0	0	0	0	0	0	0	0	0	0	0
starch degradation IV	Group 1	0	0	0	0	0	0	0	0	0	0	0	0	0	0	0	0	0	0	0	0	0	0	0	0	0	0	0	0	0	0	0	0	0	0	0	0	0	0	0	0	0	0	0	0	0	0	0	0
sulfur volatiles biosynthesis	Group 1	0	0	0	0	0	0	0	0	0	0	0	0	0	0	0	0	0	0	0	0	0	0	0	0	0	0	0	0	0	0	0	0	0	0	0	0	0	0	0	0	0	0	0	0	0	0	0	0
pinitol biosynthesis I	Group 1	0	0	0	0	0	0	0	0	0	0	0	0	0	0	0	0	0	0	0	0	0	0	0	0	0	0	0	0	0	0	0	0	0	0	0	0	0	0	0	0	0	0	0	0	0	0	0	0
pinitol biosynthesis II	Group 1	0	0	0	0	0	0	0	0	0	0	0	0	0	0	0	0	0	0	0	0	0	0	0	0	0	0	0	0	0	0	0	0	0	0	0	0	0	0	0	0	0	0	0	0	0	0	0	0
methane oxidation to methanol II	Group 1	0	0	0	0	0	0	0	0	0	0	0	0	0	0	0	0	0	0	0	0	0	0	0	0	0	0	0	0	0	0	0	0	0	0	0	0	0	0	0	0	0	0	0	0	0	0	0	0
hydrogen production I	Group 1	0	0	0	0	0	0	0	0	0	0	0	0	0	0	0	0	0	0	0	0	0	0	0	0	0	0	0	0	0	0	0	0	0	0	0	0	0	0	0	0	0	0	0	0	0	0	0	0
phytochelatins biosynthesis	Group 1	0	0	0	0	0	0	0	0	0	0	0	0	0	0	0	0	0	0	0	0	0	0	0	0	0	0	0	0	0	0	0	0	0	0	0	0	0	0	0	0	0	0	0	0	0	0	0	0
nitrate reduction VII (denitrification)	Group 1	0	0	0	0	0	0	0	0	0	0	0	0	0	0	0	0	0	0	0	0	0	0	0	0	0	0	0	0	0	0	0	0	0	0	0	0	0	0	0	0	0	0	0	0	0	0	0	0
o-diquinones biosynthesis	Group 1	0	0	0	0	0	0	0	0	0	0	0	0	0	0	0	0	0	0	0	0	0	0	0	0	0	0	0	0	0	0	0	0	0	0	0	0	0	0	0	0	0	0	0	0	0	0	0	0
D-xylose degradation III	Group 1	0	0	0	0	0	0	0	0	0	0	0	0	0	0	0	0	0	0	0	0	0	0	0	0	0	0	0	0	0	0	0	0	0	0	0	0	0	0	0	0	0	0	0	0	0	0	0	0
salicylate glucosides biosynthesis IV	Group 1	0	0	0	0	0	0	0	0	0	0	0	0	0	0	0	0	0	0	0	0	0	0	0	0	0	0	0	0	0	0	0	0	0	0	0	0	0	0	0	0	0	0	0	0	0	0	0	0
salicortin biosynthesis	Group 1	0	0	0	0	0	0	0	0	0	0	0	0	0	0	0	0	0	0	0	0	0	0	0	0	0	0	0	0	0	0	0	0	0	0	0	0	0	0	0	0	0	0	0	0	0	0	0	0
hydrogen production IV	Group 1	0	0	0	0	0	0	0	0	0	0	0	0	0	0	0	0	0	0	0	0	0	0	0	0	0	0	0	0	0	0	0	0	0	0	0	0	0	0	0	0	0	0	0	0	0	0	0	0
salicin biosynthesis	Group 1	0	0	0	0	0	0	0	0	0	0	0	0	0	0	0	0	0	0	0	0	0	0	0	0	0	0	0	0	0	0	0	0	0	0	0	0	0	0	0	0	0	0	0	0	0	0	0	0
4,4'-diapolycopenedioate biosynthesis	Group 1	0	0	0	0	0	0	0	0	0	0	0	0	0	0	0	0	0	0	0	0	0	0	0	0	0	0	0	0	0	0	0	0	0	0	0	0	0	0	0	0	0	0	0	0	0	0	0	0
rhamnogalacturonan type I degradation I	Group 1	0	0	0	0	0	0	0	0	0	0	0	0	0	0	0	0	0	0	0	0	0	0	0	0	0	0	0	0	0	0	0	0	0	0	0	0	0	0	0	0	0	0	0	0	0	0	0	0
hydrogen production V	Group 1	0	0	0	0	0	0	0	0	0	0	0	0	0	0	0	0	0	0	0	0	0	0	0	0	0	0	0	0	0	0	0	0	0	0	0	0	0	0	0	0	0	0	0	0	0	0	0	0
laminaribiose degradation	Group 1	0	0	0	0	0	0	0	0	0	0	0	0	0	0	0	0	0	0	0	0	0	0	0	0	0	0	0	0	0	0	0	0	0	0	0	0	0	0	0	0	0	0	0	0	0	0	0	0
hydrogen production VI	Group 1	0	0	0	0	0	0	0	0	0	0	0	0	0	0	0	0	0	0	0	0	0	0	0	0	0	0	0	0	0	0	0	0	0	0	0	0	0	0	0	0	0	0	0	0	0	0	0	0
cellulose and hemicellulose degradation (cellulolosome)	Group 1	0	0	0	0	0	0	0	0	0	0	0	0	0	0	0	0	0	0	0	0	0	0	0	0	0	0	0	0	0	0	0	0	0	0	0	0	0	0	0	0	0	0	0	0	0	0	0	0
detoxification of reactive carbonyls in chloroplasts	Group 1	0	0	0	0	0	0	0	0	0	0	0	0	0	0	0	0	0	0	0	0	0	0	0	0	0	0	0	0	0	0	0	0	0	0	0	0	0	0	0	0	0	0	0	0	0	0	0	0
flavonoid biosynthesis (in equisetum)	Group 1	0	0	0	0	0	0	0	0	0	0	0	0	0	0	0	0	0	0	0	0	0	0	0	0	0	0	0	0	0	0	0	0	0	0	0	0	0	0	0	0	0	0	0	0	0	0	0	0
cellulose degradation II (fungi)	Group 1	0	0	0	0	0	0	0	0	0	0	0	0	0	0	0	0	0	0	0	0	0	0	0	0	0	0	0	0	0	0	0	0	0	0	0	0	0	0	0	0	0	0	0	0	0	0	0	0
(1,3)-beta-D-xylan degradation	Group 1	0	0	0	0	0	0	0	0	0	0	0	0	0	0	0	0	0	0	0	0	0	0	0	0	0	0	0	0	0	0	0	0	0	0	0	0	0	0	0	0	0	0	0	0	0	0	0	0
L-arabinan degradation	Group 1	0	0	0	0	0	0	0	0	0	0	0	0	0	0	0	0	0	0	0	0	0	0	0	0	0	0	0	0	0	0	0	0	0	0	0	0	0	0	0	0	0	0	0	0	0	0	0	0
xyloglucan degradation I (endoglucanase)	Group 1	0	0	0	0	0	0	0	0	0	0	0	0	0	0	0	0	0	0	0	0	0	0	0	0	0	0	0	0	0	0	0	0	0	0	0	0	0	0	0	0	0	0	0	0	0	0	0	0
scopoletin biosynthesis	Group 1	0	0	0	0	0	0	0	0	0	0	0	0	0	0	0	0	0	0	0	0	0	0	0	0	0	0	0	0	0	0	0	0	0	0	0	0	0	0	0	0	0	0	0	0	0	0	0	0
adenosine 5'-phosphoramidate biosynthesis	Group 1	0	0	0	0	0	0	0	0	0	0	0	0	0	0	0	0	0	0	0	0	0	0	0	0	0	0	0	0	0	0	0	0	0	0	0	0	0	0	0	0	0	0	0	0	0	0	0	0
diacylglyceryl-N,N,N-trimethylhomoserine biosynthesis	Group 1	0	0	0	0	0	0	0	0	0	0	0	0	0	0	0	0	0	0	0	0	0	0	0	0	0	0	0	0	0	0	0	0	0	0	0	0	0	0	0	0	0	0	0	0	0	0	0	0
6-hydroxymethyl-dihydropterin diphosphate biosynthesis II (Methanocaldococcus)	Group 1	0	0	0	0	0	0	0	0	0	0	0	0	0	0	0	0	0	0	0	0	0	0	0	0	0	0	0	0	0	0	0	0	0	0	0	0	0	0	0	0	0	0	0	0	0	0	0	0
fatty acid biosynthesis initiation (plant mitochondria)	Group 1	0	0	0	0	0	0	0	0	0	0	0	0	0	0	0	0	0	0	0	0	0	0	0	0	0	0	0	0	0	0	0	0	0	0	0	0	0	0	0	0	0	0	0	0	0	0	0	0
phosphatidylcholine acyl editing	Group 1	0	0	0	0	0	0	0	0	0	0	0	0	0	0	0	0	0	0	0	0	0	0	0	0	0	0	0	0	0	0	0	0	0	0	0	0	0	0	0	0	0	0	0	0	0	0	0	0
diacylglycerol biosynthesis (PUFA enrichment in oilseed)	Group 1	0	0	0	0	0	0	0	0	0	0	0	0	0	0	0	0	0	0	0	0	0	0	0	0	0	0	0	0	0	0	0	0	0	0	0	0	0	0	0	0	0	0	0	0	0	0	0	0
cellulose degradation I (cellulosome)	Group 1	0	0	0	0	0	0	0	0	0	0	0	0	0	0	0	0	0	0	0	0	0	0	0	0	0	0	0	0	0	0	0	0	0	0	0	0	0	0	0	0	0	0	0	0	0	0	0	0
carotenoid cleavage	Group 1	0	0	0	0	0	0	0	0	0	0	0	0	0	0	0	0	0	0	0	0	0	0	0	0	0	0	0	0	0	0	0	0	0	0	0	0	0	0	0	0	0	0	0	0	0	0	0	0
dTDP-&alpha;-D-forosamine biosynthesis	Group 1	0	0	0	0	0	0	0	0	0	0	0	0	0	0	0	0	0	0	0	0	0	0	0	0	0	0	0	0	0	0	0	0	0	0	0	0	0	0	0	0	0	0	0	0	0	0	0	0
neoxanthin biosynthesis	Group 1	0	0	0	0	0	0	0	0	0	0	0	0	0	0	0	0	0	0	0	0	0	0	0	0	0	0	0	0	0	0	0	0	0	0	0	0	0	0	0	0	0	0	0	0	0	0	0	0
xyloglucan degradation III (cellobiohydrolase)	Group 1	0	0	0	0	0	0	0	0	0	0	0	0	0	0	0	0	0	0	0	0	0	0	0	0	0	0	0	0	0	0	0	0	0	0	0	0	0	0	0	0	0	0	0	0	0	0	0	0
glucuronoarabinoxylan degradation	Group 1	0	0	0	0	0	0	0	0	0	0	0	0	0	0	0	0	0	0	0	0	0	0	0	0	0	0	0	0	0	0	0	0	0	0	0	0	0	0	0	0	0	0	0	0	0	0	0	0
porphyran degradation	Group 1	0	0	0	0	0	0	0	0	0	0	0	0	0	0	0	0	0	0	0	0	0	0	0	0	0	0	0	0	0	0	0	0	0	0	0	0	0	0	0	0	0	0	0	0	0	0	0	0
agarose degradation	Group 1	0	0	0	0	0	0	0	0	0	0	0	0	0	0	0	0	0	0	0	0	0	0	0	0	0	0	0	0	0	0	0	0	0	0	0	0	0	0	0	0	0	0	0	0	0	0	0	0
&lambda;-carrageenan degradation	Group 1	0	0	0	0	0	0	0	0	0	0	0	0	0	0	0	0	0	0	0	0	0	0	0	0	0	0	0	0	0	0	0	0	0	0	0	0	0	0	0	0	0	0	0	0	0	0	0	0
diphyllin biosynthesis	Group 1	0	0	0	0	0	0	0	0	0	0	0	0	0	0	0	0	0	0	0	0	0	0	0	0	0	0	0	0	0	0	0	0	0	0	0	0	0	0	0	0	0	0	0	0	0	0	0	0
&kappa;-carrageenan degradation	Group 1	0	0	0	0	0	0	0	0	0	0	0	0	0	0	0	0	0	0	0	0	0	0	0	0	0	0	0	0	0	0	0	0	0	0	0	0	0	0	0	0	0	0	0	0	0	0	0	0
&iota;-carrageenan degradation	Group 1	0	0	0	0	0	0	0	0	0	0	0	0	0	0	0	0	0	0	0	0	0	0	0	0	0	0	0	0	0	0	0	0	0	0	0	0	0	0	0	0	0	0	0	0	0	0	0	0
justicidin B biosynthesis	Group 1	0	0	0	0	0	0	0	0	0	0	0	0	0	0	0	0	0	0	0	0	0	0	0	0	0	0	0	0	0	0	0	0	0	0	0	0	0	0	0	0	0	0	0	0	0	0	0	0
phosphatidylcholine biosynthesis V	Group 1	0	0	0	0	0	0	0	0	0	0	0	0	0	0	0	0	0	0	0	0	0	0	0	0	0	0	0	0	0	0	0	0	0	0	0	0	0	0	0	0	0	0	0	0	0	0	0	0
gellan degradation	Group 1	0	0	0	0	0	0	0	0	0	0	0	0	0	0	0	0	0	0	0	0	0	0	0	0	0	0	0	0	0	0	0	0	0	0	0	0	0	0	0	0	0	0	0	0	0	0	0	0
tRNA methylation (yeast)	Group 1	0	0	0	0	0	0	0	0	0	0	0	0	0	0	0	0	0	0	0	0	0	0	0	0	0	0	0	0	0	0	0	0	0	0	0	0	0	0	0	0	0	0	0	0	0	0	0	0
6-gingerol biosynthesis	Group 1	0	0	0	0	0	0	0	0	0	0	0	0	0	0	0	0	0	0	0	0	0	0	0	0	0	0	0	0	0	0	0	0	0	0	0	0	0	0	0	0	0	0	0	0	0	0	0	0
santalene biosynthesis II	Group 1	0	0	0	0	0	0	0	0	0	0	0	0	0	0	0	0	0	0	0	0	0	0	0	0	0	0	0	0	0	0	0	0	0	0	0	0	0	0	0	0	0	0	0	0	0	0	0	0
homoglutathione biosynthesis	Group 1	0	0	0	0	0	0	0	0	0	0	0	0	0	0	0	0	0	0	0	0	0	0	0	0	0	0	0	0	0	0	0	0	0	0	0	0	0	0	0	0	0	0	0	0	0	0	0	0
homophytochelatin biosynthesis	Group 1	0	0	0	0	0	0	0	0	0	0	0	0	0	0	0	0	0	0	0	0	0	0	0	0	0	0	0	0	0	0	0	0	0	0	0	0	0	0	0	0	0	0	0	0	0	0	0	0
glutathione-mediated detoxification II	Group 1	0	0	0	0	0	0	0	0	0	0	0	0	0	0	0	0	0	0	0	0	0	0	0	0	0	0	0	0	0	0	0	0	0	0	0	0	0	0	0	0	0	0	0	0	0	0	0	0
rutin degradation	Group 1	0	0	0	0	0	0	0	0	0	0	0	0	0	0	0	0	0	0	0	0	0	0	0	0	0	0	0	0	0	0	0	0	0	0	0	0	0	0	0	0	0	0	0	0	0	0	0	0
ethene biosynthesis II (microbes)	Group 1	0	0	0	0	0	0	0	0	0	0	0	0	0	0	0	0	0	0	0	0	0	0	0	0	0	0	0	0	0	0	0	0	0	0	0	0	0	0	0	0	0	0	0	0	0	0	0	0
retinol biosynthesis	Group 1	0	0	0	0	0	0	0	0	0	0	0	0	0	0	0	0	0	0	0	0	0	0	0	0	0	0	0	0	0	0	0	0	0	0	0	0	0	0	0	0	0	0	0	0	0	0	0	0
the visual cycle I (vertebrates)	Group 1	0	0	0	0	0	0	0	0	0	0	0	0	0	0	0	0	0	0	0	0	0	0	0	0	0	0	0	0	0	0	0	0	0	0	0	0	0	0	0	0	0	0	0	0	0	0	0	0
retinoate biosynthesis I	Group 1	0	0	0	0	0	0	0	0	0	0	0	0	0	0	0	0	0	0	0	0	0	0	0	0	0	0	0	0	0	0	0	0	0	0	0	0	0	0	0	0	0	0	0	0	0	0	0	0
long chain fatty acid ester synthesis (engineered)	Group 1	0	0	0	0	0	0	0	0	0	0	0	0	0	0	0	0	0	0	0	0	0	0	0	0	0	0	0	0	0	0	0	0	0	0	0	0	0	0	0	0	0	0	0	0	0	0	0	0
retinoate biosynthesis II	Group 1	0	0	0	0	0	0	0	0	0	0	0	0	0	0	0	0	0	0	0	0	0	0	0	0	0	0	0	0	0	0	0	0	0	0	0	0	0	0	0	0	0	0	0	0	0	0	0	0
isopropanol biosynthesis (engineered)	Group 1	0	0	0	0	0	0	0	0	0	0	0	0	0	0	0	0	0	0	0	0	0	0	0	0	0	0	0	0	0	0	0	0	0	0	0	0	0	0	0	0	0	0	0	0	0	0	0	0
zealexin biosynthesis	Group 1	0	0	0	0	0	0	0	0	0	0	0	0	0	0	0	0	0	0	0	0	0	0	0	0	0	0	0	0	0	0	0	0	0	0	0	0	0	0	0	0	0	0	0	0	0	0	0	0
thiamine diphosphate salvage III	Group 1	0	0	0	0	0	0	0	0	0	0	0	0	0	0	0	0	0	0	0	0	0	0	0	0	0	0	0	0	0	0	0	0	0	0	0	0	0	0	0	0	0	0	0	0	0	0	0	0
base-degraded thiamine salvage	Group 1	0	0	0	0	0	0	0	0	0	0	0	0	0	0	0	0	0	0	0	0	0	0	0	0	0	0	0	0	0	0	0	0	0	0	0	0	0	0	0	0	0	0	0	0	0	0	0	0
(Z)-butanethial-S-oxide biosynthesis	Group 1	0	0	0	0	0	0	0	0	0	0	0	0	0	0	0	0	0	0	0	0	0	0	0	0	0	0	0	0	0	0	0	0	0	0	0	0	0	0	0	0	0	0	0	0	0	0	0	0
thiamine diphosphate biosynthesis III (Staphylococcus)	Group 1	0	0	0	0	0	0	0	0	0	0	0	0	0	0	0	0	0	0	0	0	0	0	0	0	0	0	0	0	0	0	0	0	0	0	0	0	0	0	0	0	0	0	0	0	0	0	0	0
thiamine diphosphate biosynthesis IV (eukaryotes)	Group 1	0	0	0	0	0	0	0	0	0	0	0	0	0	0	0	0	0	0	0	0	0	0	0	0	0	0	0	0	0	0	0	0	0	0	0	0	0	0	0	0	0	0	0	0	0	0	0	0
thiazole component of thiamne diphosphate biosynthesis III	Group 1	0	0	0	0	0	0	0	0	0	0	0	0	0	0	0	0	0	0	0	0	0	0	0	0	0	0	0	0	0	0	0	0	0	0	0	0	0	0	0	0	0	0	0	0	0	0	0	0
methylbutenol biosynthesis	Group 1	0	0	0	0	0	0	0	0	0	0	0	0	0	0	0	0	0	0	0	0	0	0	0	0	0	0	0	0	0	0	0	0	0	0	0	0	0	0	0	0	0	0	0	0	0	0	0	0
sophoraflavanone G biosynthesis	Group 1	0	0	0	0	0	0	0	0	0	0	0	0	0	0	0	0	0	0	0	0	0	0	0	0	0	0	0	0	0	0	0	0	0	0	0	0	0	0	0	0	0	0	0	0	0	0	0	0
pentalenolactone biosynthesis	Group 1	0	0	0	0	0	0	0	0	0	0	0	0	0	0	0	0	0	0	0	0	0	0	0	0	0	0	0	0	0	0	0	0	0	0	0	0	0	0	0	0	0	0	0	0	0	0	0	0
vernolate biosynthesis III	Group 1	0	0	0	0	0	0	0	0	0	0	0	0	0	0	0	0	0	0	0	0	0	0	0	0	0	0	0	0	0	0	0	0	0	0	0	0	0	0	0	0	0	0	0	0	0	0	0	0
neopentalenoketolactone and pentalenate biosynthesis	Group 1	0	0	0	0	0	0	0	0	0	0	0	0	0	0	0	0	0	0	0	0	0	0	0	0	0	0	0	0	0	0	0	0	0	0	0	0	0	0	0	0	0	0	0	0	0	0	0	0
6-gingerol analog biosynthesis (engineered)	Group 1	0	0	0	0	0	0	0	0	0	0	0	0	0	0	0	0	0	0	0	0	0	0	0	0	0	0	0	0	0	0	0	0	0	0	0	0	0	0	0	0	0	0	0	0	0	0	0	0
ricinine degradation	Group 1	0	0	0	0	0	0	0	0	0	0	0	0	0	0	0	0	0	0	0	0	0	0	0	0	0	0	0	0	0	0	0	0	0	0	0	0	0	0	0	0	0	0	0	0	0	0	0	0
pyrethrin I biosynthesis	Group 1	0	0	0	0	0	0	0	0	0	0	0	0	0	0	0	0	0	0	0	0	0	0	0	0	0	0	0	0	0	0	0	0	0	0	0	0	0	0	0	0	0	0	0	0	0	0	0	0
chlorophyll a degradation II	Group 1	0	0	0	0	0	0	0	0	0	0	0	0	0	0	0	0	0	0	0	0	0	0	0	0	0	0	0	0	0	0	0	0	0	0	0	0	0	0	0	0	0	0	0	0	0	0	0	0
phenolic malonylglucosides biosynthesis	Group 1	0	0	0	0	0	0	0	0	0	0	0	0	0	0	0	0	0	0	0	0	0	0	0	0	0	0	0	0	0	0	0	0	0	0	0	0	0	0	0	0	0	0	0	0	0	0	0	0
selenate reduction	Group 1	0	0	0	0	0	0	0	0	0	0	0	0	0	0	0	0	0	0	0	0	0	0	0	0	0	0	0	0	0	0	0	0	0	0	0	0	0	0	0	0	0	0	0	0	0	0	0	0
seleno-amino acid detoxification and volatilization II	Group 1	0	0	0	0	0	0	0	0	0	0	0	0	0	0	0	0	0	0	0	0	0	0	0	0	0	0	0	0	0	0	0	0	0	0	0	0	0	0	0	0	0	0	0	0	0	0	0	0
NADH repair (eukaryotes)	Group 1	0	0	0	0	0	0	0	0	0	0	0	0	0	0	0	0	0	0	0	0	0	0	0	0	0	0	0	0	0	0	0	0	0	0	0	0	0	0	0	0	0	0	0	0	0	0	0	0
icosapentaenoate biosynthesis VI (fungi)	Group 1	0	0	0	0	0	0	0	0	0	0	0	0	0	0	0	0	0	0	0	0	0	0	0	0	0	0	0	0	0	0	0	0	0	0	0	0	0	0	0	0	0	0	0	0	0	0	0	0
styrene degradation	Group 1	0	0	0	0	0	0	0	0	0	0	0	0	0	0	0	0	0	0	0	0	0	0	0	0	0	0	0	0	0	0	0	0	0	0	0	0	0	0	0	0	0	0	0	0	0	0	0	0
dTDP-D-desosamine biosynthesis	Group 1	0	0	0	0	0	0	0	0	0	0	0	0	0	0	0	0	0	0	0	0	0	0	0	0	0	0	0	0	0	0	0	0	0	0	0	0	0	0	0	0	0	0	0	0	0	0	0	0
cholesterol degradation to androstenedione I (cholesterol oxidase)	Group 1	0	0	0	0	0	0	0	0	0	0	0	0	0	0	0	0	0	0	0	0	0	0	0	0	0	0	0	0	0	0	0	0	0	0	0	0	0	0	0	0	0	0	0	0	0	0	0	0
cholesterol degradation to androstenedione II (cholesterol dehydrogenase)	Group 1	0	0	0	0	0	0	0	0	0	0	0	0	0	0	0	0	0	0	0	0	0	0	0	0	0	0	0	0	0	0	0	0	0	0	0	0	0	0	0	0	0	0	0	0	0	0	0	0
sitosterol degradation to androstenedione	Group 1	0	0	0	0	0	0	0	0	0	0	0	0	0	0	0	0	0	0	0	0	0	0	0	0	0	0	0	0	0	0	0	0	0	0	0	0	0	0	0	0	0	0	0	0	0	0	0	0
DIBOA-glucoside biosynthesis	Group 1	0	0	0	0	0	0	0	0	0	0	0	0	0	0	0	0	0	0	0	0	0	0	0	0	0	0	0	0	0	0	0	0	0	0	0	0	0	0	0	0	0	0	0	0	0	0	0	0
DIMBOA-glucoside biosynthesis	Group 1	0	0	0	0	0	0	0	0	0	0	0	0	0	0	0	0	0	0	0	0	0	0	0	0	0	0	0	0	0	0	0	0	0	0	0	0	0	0	0	0	0	0	0	0	0	0	0	0
lincomycin A biosynthesis	Group 1	0	0	0	0	0	0	0	0	0	0	0	0	0	0	0	0	0	0	0	0	0	0	0	0	0	0	0	0	0	0	0	0	0	0	0	0	0	0	0	0	0	0	0	0	0	0	0	0
icosapentaenoate biosynthesis I (lower eukaryotes)	Group 1	0	0	0	0	0	0	0	0	0	0	0	0	0	0	0	0	0	0	0	0	0	0	0	0	0	0	0	0	0	0	0	0	0	0	0	0	0	0	0	0	0	0	0	0	0	0	0	0
L-ascorbate degradation V	Group 1	0	0	0	0	0	0	0	0	0	0	0	0	0	0	0	0	0	0	0	0	0	0	0	0	0	0	0	0	0	0	0	0	0	0	0	0	0	0	0	0	0	0	0	0	0	0	0	0
abscisic acid biosynthesis	Group 1	0	0	0	0	0	0	0	0	0	0	0	0	0	0	0	0	0	0	0	0	0	0	0	0	0	0	0	0	0	0	0	0	0	0	0	0	0	0	0	0	0	0	0	0	0	0	0	0
L-ascorbate degradation III	Group 1	0	0	0	0	0	0	0	0	0	0	0	0	0	0	0	0	0	0	0	0	0	0	0	0	0	0	0	0	0	0	0	0	0	0	0	0	0	0	0	0	0	0	0	0	0	0	0	0
methanol oxidation to formaldehyde I	Group 1	0	0	0	0	0	0	0	0	0	0	0	0	0	0	0	0	0	0	0	0	0	0	0	0	0	0	0	0	0	0	0	0	0	0	0	0	0	0	0	0	0	0	0	0	0	0	0	0
methylamine degradation I	Group 1	0	0	0	0	0	0	0	0	0	0	0	0	0	0	0	0	0	0	0	0	0	0	0	0	0	0	0	0	0	0	0	0	0	0	0	0	0	0	0	0	0	0	0	0	0	0	0	0
oleandomycin biosynthesis	Group 1	0	0	0	0	0	0	0	0	0	0	0	0	0	0	0	0	0	0	0	0	0	0	0	0	0	0	0	0	0	0	0	0	0	0	0	0	0	0	0	0	0	0	0	0	0	0	0	0
oleandomycin activation/inactivation	Group 1	0	0	0	0	0	0	0	0	0	0	0	0	0	0	0	0	0	0	0	0	0	0	0	0	0	0	0	0	0	0	0	0	0	0	0	0	0	0	0	0	0	0	0	0	0	0	0	0
dTDP-&alpha;-D-olivose, dTDP-&alpha;-D-oliose and dTDP-&alpha;-D-mycarose biosynthesis	Group 1	0	0	0	0	0	0	0	0	0	0	0	0	0	0	0	0	0	0	0	0	0	0	0	0	0	0	0	0	0	0	0	0	0	0	0	0	0	0	0	0	0	0	0	0	0	0	0	0
dTDP-beta-L-olivose biosynthesis	Group 1	0	0	0	0	0	0	0	0	0	0	0	0	0	0	0	0	0	0	0	0	0	0	0	0	0	0	0	0	0	0	0	0	0	0	0	0	0	0	0	0	0	0	0	0	0	0	0	0
dTDP-beta-L-mycarose biosynthesis	Group 1	0	0	0	0	0	0	0	0	0	0	0	0	0	0	0	0	0	0	0	0	0	0	0	0	0	0	0	0	0	0	0	0	0	0	0	0	0	0	0	0	0	0	0	0	0	0	0	0
plastoquinol-9 biosynthesis II	Group 1	0	0	0	0	0	0	0	0	0	0	0	0	0	0	0	0	0	0	0	0	0	0	0	0	0	0	0	0	0	0	0	0	0	0	0	0	0	0	0	0	0	0	0	0	0	0	0	0
umbelliferone biosynthesis	Group 1	0	0	0	0	0	0	0	0	0	0	0	0	0	0	0	0	0	0	0	0	0	0	0	0	0	0	0	0	0	0	0	0	0	0	0	0	0	0	0	0	0	0	0	0	0	0	0	0
threo-tetrahydrobiopterin biosynthesis	Group 1	0	0	0	0	0	0	0	0	0	0	0	0	0	0	0	0	0	0	0	0	0	0	0	0	0	0	0	0	0	0	0	0	0	0	0	0	0	0	0	0	0	0	0	0	0	0	0	0
lipoate salvage II	Group 1	0	0	0	0	0	0	0	0	0	0	0	0	0	0	0	0	0	0	0	0	0	0	0	0	0	0	0	0	0	0	0	0	0	0	0	0	0	0	0	0	0	0	0	0	0	0	0	0
(-)-camphor degradation	Group 1	0	0	0	0	0	0	0	0	0	0	0	0	0	0	0	0	0	0	0	0	0	0	0	0	0	0	0	0	0	0	0	0	0	0	0	0	0	0	0	0	0	0	0	0	0	0	0	0
(+)-camphor biosynthesis	Group 1	0	0	0	0	0	0	0	0	0	0	0	0	0	0	0	0	0	0	0	0	0	0	0	0	0	0	0	0	0	0	0	0	0	0	0	0	0	0	0	0	0	0	0	0	0	0	0	0
(-)-camphor biosynthesis	Group 1	0	0	0	0	0	0	0	0	0	0	0	0	0	0	0	0	0	0	0	0	0	0	0	0	0	0	0	0	0	0	0	0	0	0	0	0	0	0	0	0	0	0	0	0	0	0	0	0
1,5-anhydrofructose degradation	Group 1	0	0	0	0	0	0	0	0	0	0	0	0	0	0	0	0	0	0	0	0	0	0	0	0	0	0	0	0	0	0	0	0	0	0	0	0	0	0	0	0	0	0	0	0	0	0	0	0
L-pyrrolysine biosynthesis	Group 1	0	0	0	0	0	0	0	0	0	0	0	0	0	0	0	0	0	0	0	0	0	0	0	0	0	0	0	0	0	0	0	0	0	0	0	0	0	0	0	0	0	0	0	0	0	0	0	0
5-hydroxymethylfurfural degradation	Group 1	0	0	0	0	0	0	0	0	0	0	0	0	0	0	0	0	0	0	0	0	0	0	0	0	0	0	0	0	0	0	0	0	0	0	0	0	0	0	0	0	0	0	0	0	0	0	0	0
daidzin and daidzein degradation	Group 1	0	0	0	0	0	0	0	0	0	0	0	0	0	0	0	0	0	0	0	0	0	0	0	0	0	0	0	0	0	0	0	0	0	0	0	0	0	0	0	0	0	0	0	0	0	0	0	0
furfural degradation	Group 1	0	0	0	0	0	0	0	0	0	0	0	0	0	0	0	0	0	0	0	0	0	0	0	0	0	0	0	0	0	0	0	0	0	0	0	0	0	0	0	0	0	0	0	0	0	0	0	0
CDP-D-arabitol biosynthesis	Group 1	0	0	0	0	0	0	0	0	0	0	0	0	0	0	0	0	0	0	0	0	0	0	0	0	0	0	0	0	0	0	0	0	0	0	0	0	0	0	0	0	0	0	0	0	0	0	0	0
theophylline degradation	Group 1	0	0	0	0	0	0	0	0	0	0	0	0	0	0	0	0	0	0	0	0	0	0	0	0	0	0	0	0	0	0	0	0	0	0	0	0	0	0	0	0	0	0	0	0	0	0	0	0
brassinosteroid biosynthesis I	Group 1	0	0	0	0	0	0	0	0	0	0	0	0	0	0	0	0	0	0	0	0	0	0	0	0	0	0	0	0	0	0	0	0	0	0	0	0	0	0	0	0	0	0	0	0	0	0	0	0
GDP-L-fucose biosynthesis II (from L-fucose)	Group 1	0	0	0	0	0	0	0	0	0	0	0	0	0	0	0	0	0	0	0	0	0	0	0	0	0	0	0	0	0	0	0	0	0	0	0	0	0	0	0	0	0	0	0	0	0	0	0	0
4-amino-3-hydroxybenzoate degradation	Group 1	0	0	0	0	0	0	0	0	0	0	0	0	0	0	0	0	0	0	0	0	0	0	0	0	0	0	0	0	0	0	0	0	0	0	0	0	0	0	0	0	0	0	0	0	0	0	0	0
methyl ketone biosynthesis (engineered)	Group 1	0	0	0	0	0	0	0	0	0	0	0	0	0	0	0	0	0	0	0	0	0	0	0	0	0	0	0	0	0	0	0	0	0	0	0	0	0	0	0	0	0	0	0	0	0	0	0	0
2,2'-dihydroxybiphenyl degradation	Group 1	0	0	0	0	0	0	0	0	0	0	0	0	0	0	0	0	0	0	0	0	0	0	0	0	0	0	0	0	0	0	0	0	0	0	0	0	0	0	0	0	0	0	0	0	0	0	0	0
2-propylphenol degradation	Group 1	0	0	0	0	0	0	0	0	0	0	0	0	0	0	0	0	0	0	0	0	0	0	0	0	0	0	0	0	0	0	0	0	0	0	0	0	0	0	0	0	0	0	0	0	0	0	0	0
2-isopropylphenol degradation	Group 1	0	0	0	0	0	0	0	0	0	0	0	0	0	0	0	0	0	0	0	0	0	0	0	0	0	0	0	0	0	0	0	0	0	0	0	0	0	0	0	0	0	0	0	0	0	0	0	0
paromamine biosynthesis I	Group 1	0	0	0	0	0	0	0	0	0	0	0	0	0	0	0	0	0	0	0	0	0	0	0	0	0	0	0	0	0	0	0	0	0	0	0	0	0	0	0	0	0	0	0	0	0	0	0	0
ribostamycin biosynthesis	Group 1	0	0	0	0	0	0	0	0	0	0	0	0	0	0	0	0	0	0	0	0	0	0	0	0	0	0	0	0	0	0	0	0	0	0	0	0	0	0	0	0	0	0	0	0	0	0	0	0
neomycin biosynthesis	Group 1	0	0	0	0	0	0	0	0	0	0	0	0	0	0	0	0	0	0	0	0	0	0	0	0	0	0	0	0	0	0	0	0	0	0	0	0	0	0	0	0	0	0	0	0	0	0	0	0
paromomycin biosynthesis	Group 1	0	0	0	0	0	0	0	0	0	0	0	0	0	0	0	0	0	0	0	0	0	0	0	0	0	0	0	0	0	0	0	0	0	0	0	0	0	0	0	0	0	0	0	0	0	0	0	0
butirosin biosynthesis	Group 1	0	0	0	0	0	0	0	0	0	0	0	0	0	0	0	0	0	0	0	0	0	0	0	0	0	0	0	0	0	0	0	0	0	0	0	0	0	0	0	0	0	0	0	0	0	0	0	0
paromamine biosynthesis II	Group 1	0	0	0	0	0	0	0	0	0	0	0	0	0	0	0	0	0	0	0	0	0	0	0	0	0	0	0	0	0	0	0	0	0	0	0	0	0	0	0	0	0	0	0	0	0	0	0	0
gentamicin biosynthesis	Group 1	0	0	0	0	0	0	0	0	0	0	0	0	0	0	0	0	0	0	0	0	0	0	0	0	0	0	0	0	0	0	0	0	0	0	0	0	0	0	0	0	0	0	0	0	0	0	0	0
terminal olefins biosynthesis I	Group 1	0	0	0	0	0	0	0	0	0	0	0	0	0	0	0	0	0	0	0	0	0	0	0	0	0	0	0	0	0	0	0	0	0	0	0	0	0	0	0	0	0	0	0	0	0	0	0	0
UDP-N,N'-diacetylbacillosamine biosynthesis	Group 1	0	0	0	0	0	0	0	0	0	0	0	0	0	0	0	0	0	0	0	0	0	0	0	0	0	0	0	0	0	0	0	0	0	0	0	0	0	0	0	0	0	0	0	0	0	0	0	0
protein N-glycosylation (bacterial)	Group 1	0	0	0	0	0	0	0	0	0	0	0	0	0	0	0	0	0	0	0	0	0	0	0	0	0	0	0	0	0	0	0	0	0	0	0	0	0	0	0	0	0	0	0	0	0	0	0	0
alkane biosynthesis I	Group 1	0	0	0	0	0	0	0	0	0	0	0	0	0	0	0	0	0	0	0	0	0	0	0	0	0	0	0	0	0	0	0	0	0	0	0	0	0	0	0	0	0	0	0	0	0	0	0	0
alkane biosynthesis II	Group 1	0	0	0	0	0	0	0	0	0	0	0	0	0	0	0	0	0	0	0	0	0	0	0	0	0	0	0	0	0	0	0	0	0	0	0	0	0	0	0	0	0	0	0	0	0	0	0	0
(9Z)-tricosene biosynthesis	Group 1	0	0	0	0	0	0	0	0	0	0	0	0	0	0	0	0	0	0	0	0	0	0	0	0	0	0	0	0	0	0	0	0	0	0	0	0	0	0	0	0	0	0	0	0	0	0	0	0
very long chain fatty acid biosynthesis II	Group 1	0	0	0	0	0	0	0	0	0	0	0	0	0	0	0	0	0	0	0	0	0	0	0	0	0	0	0	0	0	0	0	0	0	0	0	0	0	0	0	0	0	0	0	0	0	0	0	0
protein O-glycosylation (Neisseria)	Group 1	0	0	0	0	0	0	0	0	0	0	0	0	0	0	0	0	0	0	0	0	0	0	0	0	0	0	0	0	0	0	0	0	0	0	0	0	0	0	0	0	0	0	0	0	0	0	0	0
phosphatidate metabolism, as a signaling molecule	Group 1	0	0	0	0	0	0	0	0	0	0	0	0	0	0	0	0	0	0	0	0	0	0	0	0	0	0	0	0	0	0	0	0	0	0	0	0	0	0	0	0	0	0	0	0	0	0	0	0
violacein biosynthesis	Group 1	0	0	0	0	0	0	0	0	0	0	0	0	0	0	0	0	0	0	0	0	0	0	0	0	0	0	0	0	0	0	0	0	0	0	0	0	0	0	0	0	0	0	0	0	0	0	0	0
the visual cycle II (molluscs)	Group 1	0	0	0	0	0	0	0	0	0	0	0	0	0	0	0	0	0	0	0	0	0	0	0	0	0	0	0	0	0	0	0	0	0	0	0	0	0	0	0	0	0	0	0	0	0	0	0	0
the visual cycle (insects)	Group 1	0	0	0	0	0	0	0	0	0	0	0	0	0	0	0	0	0	0	0	0	0	0	0	0	0	0	0	0	0	0	0	0	0	0	0	0	0	0	0	0	0	0	0	0	0	0	0	0
11-cis-3-hydroxyretinal biosynthesis	Group 1	0	0	0	0	0	0	0	0	0	0	0	0	0	0	0	0	0	0	0	0	0	0	0	0	0	0	0	0	0	0	0	0	0	0	0	0	0	0	0	0	0	0	0	0	0	0	0	0
5-nitroanthranilate degradation	Group 1	0	0	0	0	0	0	0	0	0	0	0	0	0	0	0	0	0	0	0	0	0	0	0	0	0	0	0	0	0	0	0	0	0	0	0	0	0	0	0	0	0	0	0	0	0	0	0	0
mithramycin biosynthesis	Group 1	0	0	0	0	0	0	0	0	0	0	0	0	0	0	0	0	0	0	0	0	0	0	0	0	0	0	0	0	0	0	0	0	0	0	0	0	0	0	0	0	0	0	0	0	0	0	0	0
icosapentaenoate biosynthesis II (6-desaturase, mammals)	Group 1	0	0	0	0	0	0	0	0	0	0	0	0	0	0	0	0	0	0	0	0	0	0	0	0	0	0	0	0	0	0	0	0	0	0	0	0	0	0	0	0	0	0	0	0	0	0	0	0
docosahexaenoate biosynthesis I (lower eukaryotes)	Group 1	0	0	0	0	0	0	0	0	0	0	0	0	0	0	0	0	0	0	0	0	0	0	0	0	0	0	0	0	0	0	0	0	0	0	0	0	0	0	0	0	0	0	0	0	0	0	0	0
daphnetin modification	Group 1	0	0	0	0	0	0	0	0	0	0	0	0	0	0	0	0	0	0	0	0	0	0	0	0	0	0	0	0	0	0	0	0	0	0	0	0	0	0	0	0	0	0	0	0	0	0	0	0
daphnin interconversion	Group 1	0	0	0	0	0	0	0	0	0	0	0	0	0	0	0	0	0	0	0	0	0	0	0	0	0	0	0	0	0	0	0	0	0	0	0	0	0	0	0	0	0	0	0	0	0	0	0	0
cichoriin interconversion	Group 1	0	0	0	0	0	0	0	0	0	0	0	0	0	0	0	0	0	0	0	0	0	0	0	0	0	0	0	0	0	0	0	0	0	0	0	0	0	0	0	0	0	0	0	0	0	0	0	0
esculetin modification	Group 1	0	0	0	0	0	0	0	0	0	0	0	0	0	0	0	0	0	0	0	0	0	0	0	0	0	0	0	0	0	0	0	0	0	0	0	0	0	0	0	0	0	0	0	0	0	0	0	0
fumigaclavine biosynthesis	Group 1	0	0	0	0	0	0	0	0	0	0	0	0	0	0	0	0	0	0	0	0	0	0	0	0	0	0	0	0	0	0	0	0	0	0	0	0	0	0	0	0	0	0	0	0	0	0	0	0
2&alpha;,7beta-dihydroxylation of taxusin	Group 1	0	0	0	0	0	0	0	0	0	0	0	0	0	0	0	0	0	0	0	0	0	0	0	0	0	0	0	0	0	0	0	0	0	0	0	0	0	0	0	0	0	0	0	0	0	0	0	0
glycyrrhetinate biosynthesis	Group 1	0	0	0	0	0	0	0	0	0	0	0	0	0	0	0	0	0	0	0	0	0	0	0	0	0	0	0	0	0	0	0	0	0	0	0	0	0	0	0	0	0	0	0	0	0	0	0	0
betulinate biosynthesis	Group 1	0	0	0	0	0	0	0	0	0	0	0	0	0	0	0	0	0	0	0	0	0	0	0	0	0	0	0	0	0	0	0	0	0	0	0	0	0	0	0	0	0	0	0	0	0	0	0	0
ursolate biosynthesis	Group 1	0	0	0	0	0	0	0	0	0	0	0	0	0	0	0	0	0	0	0	0	0	0	0	0	0	0	0	0	0	0	0	0	0	0	0	0	0	0	0	0	0	0	0	0	0	0	0	0
oleanolate biosynthesis	Group 1	0	0	0	0	0	0	0	0	0	0	0	0	0	0	0	0	0	0	0	0	0	0	0	0	0	0	0	0	0	0	0	0	0	0	0	0	0	0	0	0	0	0	0	0	0	0	0	0
steviol biosynthesis	Group 1	0	0	0	0	0	0	0	0	0	0	0	0	0	0	0	0	0	0	0	0	0	0	0	0	0	0	0	0	0	0	0	0	0	0	0	0	0	0	0	0	0	0	0	0	0	0	0	0
steviol glucoside biosynthesis (rebaudioside A biosynthesis)	Group 1	0	0	0	0	0	0	0	0	0	0	0	0	0	0	0	0	0	0	0	0	0	0	0	0	0	0	0	0	0	0	0	0	0	0	0	0	0	0	0	0	0	0	0	0	0	0	0	0
hopanoid biosynthesis (bacteria)	Group 1	0	0	0	0	0	0	0	0	0	0	0	0	0	0	0	0	0	0	0	0	0	0	0	0	0	0	0	0	0	0	0	0	0	0	0	0	0	0	0	0	0	0	0	0	0	0	0	0
phenylethanol glycoconjugate biosynthesis	Group 1	0	0	0	0	0	0	0	0	0	0	0	0	0	0	0	0	0	0	0	0	0	0	0	0	0	0	0	0	0	0	0	0	0	0	0	0	0	0	0	0	0	0	0	0	0	0	0	0
phenylethyl acetate biosynthesis	Group 1	0	0	0	0	0	0	0	0	0	0	0	0	0	0	0	0	0	0	0	0	0	0	0	0	0	0	0	0	0	0	0	0	0	0	0	0	0	0	0	0	0	0	0	0	0	0	0	0
3,5-dimethoxytoluene biosynthesis	Group 1	0	0	0	0	0	0	0	0	0	0	0	0	0	0	0	0	0	0	0	0	0	0	0	0	0	0	0	0	0	0	0	0	0	0	0	0	0	0	0	0	0	0	0	0	0	0	0	0
geodin biosynthesis	Group 1	0	0	0	0	0	0	0	0	0	0	0	0	0	0	0	0	0	0	0	0	0	0	0	0	0	0	0	0	0	0	0	0	0	0	0	0	0	0	0	0	0	0	0	0	0	0	0	0
asterrate biosynthesis	Group 1	0	0	0	0	0	0	0	0	0	0	0	0	0	0	0	0	0	0	0	0	0	0	0	0	0	0	0	0	0	0	0	0	0	0	0	0	0	0	0	0	0	0	0	0	0	0	0	0
4-aminophenol degradation	Group 1	0	0	0	0	0	0	0	0	0	0	0	0	0	0	0	0	0	0	0	0	0	0	0	0	0	0	0	0	0	0	0	0	0	0	0	0	0	0	0	0	0	0	0	0	0	0	0	0
triethylamine degradation	Group 1	0	0	0	0	0	0	0	0	0	0	0	0	0	0	0	0	0	0	0	0	0	0	0	0	0	0	0	0	0	0	0	0	0	0	0	0	0	0	0	0	0	0	0	0	0	0	0	0
2-methylisoborneol biosynthesis	Group 1	0	0	0	0	0	0	0	0	0	0	0	0	0	0	0	0	0	0	0	0	0	0	0	0	0	0	0	0	0	0	0	0	0	0	0	0	0	0	0	0	0	0	0	0	0	0	0	0
taxiphyllin biosynthesis	Group 1	0	0	0	0	0	0	0	0	0	0	0	0	0	0	0	0	0	0	0	0	0	0	0	0	0	0	0	0	0	0	0	0	0	0	0	0	0	0	0	0	0	0	0	0	0	0	0	0
taxiphyllin bioactivation	Group 1	0	0	0	0	0	0	0	0	0	0	0	0	0	0	0	0	0	0	0	0	0	0	0	0	0	0	0	0	0	0	0	0	0	0	0	0	0	0	0	0	0	0	0	0	0	0	0	0
linustatin bioactivation	Group 1	0	0	0	0	0	0	0	0	0	0	0	0	0	0	0	0	0	0	0	0	0	0	0	0	0	0	0	0	0	0	0	0	0	0	0	0	0	0	0	0	0	0	0	0	0	0	0	0
neolinustatin bioactivation	Group 1	0	0	0	0	0	0	0	0	0	0	0	0	0	0	0	0	0	0	0	0	0	0	0	0	0	0	0	0	0	0	0	0	0	0	0	0	0	0	0	0	0	0	0	0	0	0	0	0
vicianin bioactivation	Group 1	0	0	0	0	0	0	0	0	0	0	0	0	0	0	0	0	0	0	0	0	0	0	0	0	0	0	0	0	0	0	0	0	0	0	0	0	0	0	0	0	0	0	0	0	0	0	0	0
3,4-dihydroxymandelonitrile beta-D-glucose biosynthesis	Group 1	0	0	0	0	0	0	0	0	0	0	0	0	0	0	0	0	0	0	0	0	0	0	0	0	0	0	0	0	0	0	0	0	0	0	0	0	0	0	0	0	0	0	0	0	0	0	0	0
spinosyn A biosynthesis	Group 1	0	0	0	0	0	0	0	0	0	0	0	0	0	0	0	0	0	0	0	0	0	0	0	0	0	0	0	0	0	0	0	0	0	0	0	0	0	0	0	0	0	0	0	0	0	0	0	0
5-deoxystrigol biosynthesis	Group 1	0	0	0	0	0	0	0	0	0	0	0	0	0	0	0	0	0	0	0	0	0	0	0	0	0	0	0	0	0	0	0	0	0	0	0	0	0	0	0	0	0	0	0	0	0	0	0	0
bisabolene biosynthesis (engineered)	Group 1	0	0	0	0	0	0	0	0	0	0	0	0	0	0	0	0	0	0	0	0	0	0	0	0	0	0	0	0	0	0	0	0	0	0	0	0	0	0	0	0	0	0	0	0	0	0	0	0
dTDP-beta-L-megosamine biosynthesis	Group 1	0	0	0	0	0	0	0	0	0	0	0	0	0	0	0	0	0	0	0	0	0	0	0	0	0	0	0	0	0	0	0	0	0	0	0	0	0	0	0	0	0	0	0	0	0	0	0	0
olivetol biosynthesis	Group 1	0	0	0	0	0	0	0	0	0	0	0	0	0	0	0	0	0	0	0	0	0	0	0	0	0	0	0	0	0	0	0	0	0	0	0	0	0	0	0	0	0	0	0	0	0	0	0	0
erythromycin D biosynthesis	Group 1	0	0	0	0	0	0	0	0	0	0	0	0	0	0	0	0	0	0	0	0	0	0	0	0	0	0	0	0	0	0	0	0	0	0	0	0	0	0	0	0	0	0	0	0	0	0	0	0
erythromycin A biosynthesis	Group 1	0	0	0	0	0	0	0	0	0	0	0	0	0	0	0	0	0	0	0	0	0	0	0	0	0	0	0	0	0	0	0	0	0	0	0	0	0	0	0	0	0	0	0	0	0	0	0	0
megalomicin A biosynthesis	Group 1	0	0	0	0	0	0	0	0	0	0	0	0	0	0	0	0	0	0	0	0	0	0	0	0	0	0	0	0	0	0	0	0	0	0	0	0	0	0	0	0	0	0	0	0	0	0	0	0
4-hydroxy-2-nonenal detoxification	Group 1	0	0	0	0	0	0	0	0	0	0	0	0	0	0	0	0	0	0	0	0	0	0	0	0	0	0	0	0	0	0	0	0	0	0	0	0	0	0	0	0	0	0	0	0	0	0	0	0
furcatin degradation	Group 1	0	0	0	0	0	0	0	0	0	0	0	0	0	0	0	0	0	0	0	0	0	0	0	0	0	0	0	0	0	0	0	0	0	0	0	0	0	0	0	0	0	0	0	0	0	0	0	0
tea aroma glycosidic precursor bioactivation	Group 1	0	0	0	0	0	0	0	0	0	0	0	0	0	0	0	0	0	0	0	0	0	0	0	0	0	0	0	0	0	0	0	0	0	0	0	0	0	0	0	0	0	0	0	0	0	0	0	0
ceramide and sphingolipid recycling and degradation (yeast)	Group 1	0	0	0	0	0	0	0	0	0	0	0	0	0	0	0	0	0	0	0	0	0	0	0	0	0	0	0	0	0	0	0	0	0	0	0	0	0	0	0	0	0	0	0	0	0	0	0	0
esterified suberin biosynthesis	Group 1	0	0	0	0	0	0	0	0	0	0	0	0	0	0	0	0	0	0	0	0	0	0	0	0	0	0	0	0	0	0	0	0	0	0	0	0	0	0	0	0	0	0	0	0	0	0	0	0
ethene biosynthesis IV (engineered)	Group 1	0	0	0	0	0	0	0	0	0	0	0	0	0	0	0	0	0	0	0	0	0	0	0	0	0	0	0	0	0	0	0	0	0	0	0	0	0	0	0	0	0	0	0	0	0	0	0	0
CDP-D-mannitol biosynthesis	Group 1	0	0	0	0	0	0	0	0	0	0	0	0	0	0	0	0	0	0	0	0	0	0	0	0	0	0	0	0	0	0	0	0	0	0	0	0	0	0	0	0	0	0	0	0	0	0	0	0
nicotine degradation III (VPP pathway)	Group 1	0	0	0	0	0	0	0	0	0	0	0	0	0	0	0	0	0	0	0	0	0	0	0	0	0	0	0	0	0	0	0	0	0	0	0	0	0	0	0	0	0	0	0	0	0	0	0	0
quercetin glucoside biosynthesis (Allium)	Group 1	0	0	0	0	0	0	0	0	0	0	0	0	0	0	0	0	0	0	0	0	0	0	0	0	0	0	0	0	0	0	0	0	0	0	0	0	0	0	0	0	0	0	0	0	0	0	0	0
L-glucose degradation	Group 1	0	0	0	0	0	0	0	0	0	0	0	0	0	0	0	0	0	0	0	0	0	0	0	0	0	0	0	0	0	0	0	0	0	0	0	0	0	0	0	0	0	0	0	0	0	0	0	0
CMP-legionaminate biosynthesis II	Group 1	0	0	0	0	0	0	0	0	0	0	0	0	0	0	0	0	0	0	0	0	0	0	0	0	0	0	0	0	0	0	0	0	0	0	0	0	0	0	0	0	0	0	0	0	0	0	0	0
quercetin glucoside degradation (Allium)	Group 1	0	0	0	0	0	0	0	0	0	0	0	0	0	0	0	0	0	0	0	0	0	0	0	0	0	0	0	0	0	0	0	0	0	0	0	0	0	0	0	0	0	0	0	0	0	0	0	0
rutin degradation (plants)	Group 1	0	0	0	0	0	0	0	0	0	0	0	0	0	0	0	0	0	0	0	0	0	0	0	0	0	0	0	0	0	0	0	0	0	0	0	0	0	0	0	0	0	0	0	0	0	0	0	0
emetine biosynthesis	Group 1	0	0	0	0	0	0	0	0	0	0	0	0	0	0	0	0	0	0	0	0	0	0	0	0	0	0	0	0	0	0	0	0	0	0	0	0	0	0	0	0	0	0	0	0	0	0	0	0
beta myrcene degradation	Group 1	0	0	0	0	0	0	0	0	0	0	0	0	0	0	0	0	0	0	0	0	0	0	0	0	0	0	0	0	0	0	0	0	0	0	0	0	0	0	0	0	0	0	0	0	0	0	0	0
quercetin gentiotetraside biosynthesis	Group 1	0	0	0	0	0	0	0	0	0	0	0	0	0	0	0	0	0	0	0	0	0	0	0	0	0	0	0	0	0	0	0	0	0	0	0	0	0	0	0	0	0	0	0	0	0	0	0	0
noscapine biosynthesis	Group 1	0	0	0	0	0	0	0	0	0	0	0	0	0	0	0	0	0	0	0	0	0	0	0	0	0	0	0	0	0	0	0	0	0	0	0	0	0	0	0	0	0	0	0	0	0	0	0	0
sesaminol glucoside biosynthesis	Group 1	0	0	0	0	0	0	0	0	0	0	0	0	0	0	0	0	0	0	0	0	0	0	0	0	0	0	0	0	0	0	0	0	0	0	0	0	0	0	0	0	0	0	0	0	0	0	0	0
myricetin gentiobioside biosynthesis	Group 1	0	0	0	0	0	0	0	0	0	0	0	0	0	0	0	0	0	0	0	0	0	0	0	0	0	0	0	0	0	0	0	0	0	0	0	0	0	0	0	0	0	0	0	0	0	0	0	0
(3S)-linalool biosynthesis	Group 1	0	0	0	0	0	0	0	0	0	0	0	0	0	0	0	0	0	0	0	0	0	0	0	0	0	0	0	0	0	0	0	0	0	0	0	0	0	0	0	0	0	0	0	0	0	0	0	0
cyanide detoxification II	Group 1	0	0	0	0	0	0	0	0	0	0	0	0	0	0	0	0	0	0	0	0	0	0	0	0	0	0	0	0	0	0	0	0	0	0	0	0	0	0	0	0	0	0	0	0	0	0	0	0
kaempferol gentiobioside biosynthesis	Group 1	0	0	0	0	0	0	0	0	0	0	0	0	0	0	0	0	0	0	0	0	0	0	0	0	0	0	0	0	0	0	0	0	0	0	0	0	0	0	0	0	0	0	0	0	0	0	0	0
genistin gentiobioside biosynthesis	Group 1	0	0	0	0	0	0	0	0	0	0	0	0	0	0	0	0	0	0	0	0	0	0	0	0	0	0	0	0	0	0	0	0	0	0	0	0	0	0	0	0	0	0	0	0	0	0	0	0
8-amino-7-oxononanoate biosynthesis II	Group 1	0	0	0	0	0	0	0	0	0	0	0	0	0	0	0	0	0	0	0	0	0	0	0	0	0	0	0	0	0	0	0	0	0	0	0	0	0	0	0	0	0	0	0	0	0	0	0	0
polymethylated quercetin glucoside biosynthesis I - quercetin series (Chrysosplenium)	Group 1	0	0	0	0	0	0	0	0	0	0	0	0	0	0	0	0	0	0	0	0	0	0	0	0	0	0	0	0	0	0	0	0	0	0	0	0	0	0	0	0	0	0	0	0	0	0	0	0
polymethylated quercetin glucoside biosynthesis II - quercetagetin series (Chrysosplenium)	Group 1	0	0	0	0	0	0	0	0	0	0	0	0	0	0	0	0	0	0	0	0	0	0	0	0	0	0	0	0	0	0	0	0	0	0	0	0	0	0	0	0	0	0	0	0	0	0	0	0
pinolenate and coniferonate biosynthesis	Group 1	0	0	0	0	0	0	0	0	0	0	0	0	0	0	0	0	0	0	0	0	0	0	0	0	0	0	0	0	0	0	0	0	0	0	0	0	0	0	0	0	0	0	0	0	0	0	0	0
grixazone biosynthesis	Group 1	0	0	0	0	0	0	0	0	0	0	0	0	0	0	0	0	0	0	0	0	0	0	0	0	0	0	0	0	0	0	0	0	0	0	0	0	0	0	0	0	0	0	0	0	0	0	0	0
ergosterol biosynthesis II	Group 1	0	0	0	0	0	0	0	0	0	0	0	0	0	0	0	0	0	0	0	0	0	0	0	0	0	0	0	0	0	0	0	0	0	0	0	0	0	0	0	0	0	0	0	0	0	0	0	0
7-dehydroporiferasterol biosynthesis	Group 1	0	0	0	0	0	0	0	0	0	0	0	0	0	0	0	0	0	0	0	0	0	0	0	0	0	0	0	0	0	0	0	0	0	0	0	0	0	0	0	0	0	0	0	0	0	0	0	0
eupatolitin 3-O-glucoside biosynthesis	Group 1	0	0	0	0	0	0	0	0	0	0	0	0	0	0	0	0	0	0	0	0	0	0	0	0	0	0	0	0	0	0	0	0	0	0	0	0	0	0	0	0	0	0	0	0	0	0	0	0
3,8-divinyl-chlorophyllide a biosynthesis III (aerobic, light independent)	Group 1	0	0	0	0	0	0	0	0	0	0	0	0	0	0	0	0	0	0	0	0	0	0	0	0	0	0	0	0	0	0	0	0	0	0	0	0	0	0	0	0	0	0	0	0	0	0	0	0
polymethylated myricetin biosynthesis (tomato)	Group 1	0	0	0	0	0	0	0	0	0	0	0	0	0	0	0	0	0	0	0	0	0	0	0	0	0	0	0	0	0	0	0	0	0	0	0	0	0	0	0	0	0	0	0	0	0	0	0	0
polymethylated quercetin biosynthesis	Group 1	0	0	0	0	0	0	0	0	0	0	0	0	0	0	0	0	0	0	0	0	0	0	0	0	0	0	0	0	0	0	0	0	0	0	0	0	0	0	0	0	0	0	0	0	0	0	0	0
polymethylated kaempferol biosynthesis	Group 1	0	0	0	0	0	0	0	0	0	0	0	0	0	0	0	0	0	0	0	0	0	0	0	0	0	0	0	0	0	0	0	0	0	0	0	0	0	0	0	0	0	0	0	0	0	0	0	0
chlorophyll a degradation III	Group 1	0	0	0	0	0	0	0	0	0	0	0	0	0	0	0	0	0	0	0	0	0	0	0	0	0	0	0	0	0	0	0	0	0	0	0	0	0	0	0	0	0	0	0	0	0	0	0	0
kaempferide triglycoside biosynthesis	Group 1	0	0	0	0	0	0	0	0	0	0	0	0	0	0	0	0	0	0	0	0	0	0	0	0	0	0	0	0	0	0	0	0	0	0	0	0	0	0	0	0	0	0	0	0	0	0	0	0
flavonol acylglucoside biosynthesis I - kaempferol derivatives	Group 1	0	0	0	0	0	0	0	0	0	0	0	0	0	0	0	0	0	0	0	0	0	0	0	0	0	0	0	0	0	0	0	0	0	0	0	0	0	0	0	0	0	0	0	0	0	0	0	0
phytochromobilin biosynthesis	Group 1	0	0	0	0	0	0	0	0	0	0	0	0	0	0	0	0	0	0	0	0	0	0	0	0	0	0	0	0	0	0	0	0	0	0	0	0	0	0	0	0	0	0	0	0	0	0	0	0
flavonol acylglucoside biosynthesis II - isorhamnetin derivatives	Group 1	0	0	0	0	0	0	0	0	0	0	0	0	0	0	0	0	0	0	0	0	0	0	0	0	0	0	0	0	0	0	0	0	0	0	0	0	0	0	0	0	0	0	0	0	0	0	0	0
flavonol acylglucoside biosynthesis III - quercetin derivatives	Group 1	0	0	0	0	0	0	0	0	0	0	0	0	0	0	0	0	0	0	0	0	0	0	0	0	0	0	0	0	0	0	0	0	0	0	0	0	0	0	0	0	0	0	0	0	0	0	0	0
quercetin triglucoside biosynthesis	Group 1	0	0	0	0	0	0	0	0	0	0	0	0	0	0	0	0	0	0	0	0	0	0	0	0	0	0	0	0	0	0	0	0	0	0	0	0	0	0	0	0	0	0	0	0	0	0	0	0
S-methyl-5-thio-&alpha;-D-ribose 1-phosphate degradation II	Group 1	0	0	0	0	0	0	0	0	0	0	0	0	0	0	0	0	0	0	0	0	0	0	0	0	0	0	0	0	0	0	0	0	0	0	0	0	0	0	0	0	0	0	0	0	0	0	0	0
nostoxanthin biosynthesis	Group 1	0	0	0	0	0	0	0	0	0	0	0	0	0	0	0	0	0	0	0	0	0	0	0	0	0	0	0	0	0	0	0	0	0	0	0	0	0	0	0	0	0	0	0	0	0	0	0	0
linalool biosynthesis I	Group 1	0	0	0	0	0	0	0	0	0	0	0	0	0	0	0	0	0	0	0	0	0	0	0	0	0	0	0	0	0	0	0	0	0	0	0	0	0	0	0	0	0	0	0	0	0	0	0	0
UTP and CTP dephosphorylation I	Group 1	0	0	0	0	0	0	0	0	0	0	0	0	0	0	0	0	0	0	0	0	0	0	0	0	0	0	0	0	0	0	0	0	0	0	0	0	0	0	0	0	0	0	0	0	0	0	0	0
eriodictyol C-glucosylation	Group 1	0	0	0	0	0	0	0	0	0	0	0	0	0	0	0	0	0	0	0	0	0	0	0	0	0	0	0	0	0	0	0	0	0	0	0	0	0	0	0	0	0	0	0	0	0	0	0	0
pinocembrin C-glucosylation	Group 1	0	0	0	0	0	0	0	0	0	0	0	0	0	0	0	0	0	0	0	0	0	0	0	0	0	0	0	0	0	0	0	0	0	0	0	0	0	0	0	0	0	0	0	0	0	0	0	0
kaempferol diglycoside biosynthesis (pollen-specific)	Group 1	0	0	0	0	0	0	0	0	0	0	0	0	0	0	0	0	0	0	0	0	0	0	0	0	0	0	0	0	0	0	0	0	0	0	0	0	0	0	0	0	0	0	0	0	0	0	0	0
quercetin diglycoside biosynthesis (pollen-specific)	Group 1	0	0	0	0	0	0	0	0	0	0	0	0	0	0	0	0	0	0	0	0	0	0	0	0	0	0	0	0	0	0	0	0	0	0	0	0	0	0	0	0	0	0	0	0	0	0	0	0
baicalein metabolism	Group 1	0	0	0	0	0	0	0	0	0	0	0	0	0	0	0	0	0	0	0	0	0	0	0	0	0	0	0	0	0	0	0	0	0	0	0	0	0	0	0	0	0	0	0	0	0	0	0	0
3-methylquinoline degradation	Group 1	0	0	0	0	0	0	0	0	0	0	0	0	0	0	0	0	0	0	0	0	0	0	0	0	0	0	0	0	0	0	0	0	0	0	0	0	0	0	0	0	0	0	0	0	0	0	0	0
wogonin metabolism	Group 1	0	0	0	0	0	0	0	0	0	0	0	0	0	0	0	0	0	0	0	0	0	0	0	0	0	0	0	0	0	0	0	0	0	0	0	0	0	0	0	0	0	0	0	0	0	0	0	0
baicalein degradation (hydrogen peroxide detoxification)	Group 1	0	0	0	0	0	0	0	0	0	0	0	0	0	0	0	0	0	0	0	0	0	0	0	0	0	0	0	0	0	0	0	0	0	0	0	0	0	0	0	0	0	0	0	0	0	0	0	0
purine deoxyribonucleosides salvage	Group 1	0	0	0	0	0	0	0	0	0	0	0	0	0	0	0	0	0	0	0	0	0	0	0	0	0	0	0	0	0	0	0	0	0	0	0	0	0	0	0	0	0	0	0	0	0	0	0	0
ubiquinol-6 biosynthesis from 4-aminobenzoate (yeast)	Group 1	0	0	0	0	0	0	0	0	0	0	0	0	0	0	0	0	0	0	0	0	0	0	0	0	0	0	0	0	0	0	0	0	0	0	0	0	0	0	0	0	0	0	0	0	0	0	0	0
gibberellin biosynthesis V	Group 1	0	0	0	0	0	0	0	0	0	0	0	0	0	0	0	0	0	0	0	0	0	0	0	0	0	0	0	0	0	0	0	0	0	0	0	0	0	0	0	0	0	0	0	0	0	0	0	0
inosine-5'-phosphate biosynthesis III	Group 1	0	0	0	0	0	0	0	0	0	0	0	0	0	0	0	0	0	0	0	0	0	0	0	0	0	0	0	0	0	0	0	0	0	0	0	0	0	0	0	0	0	0	0	0	0	0	0	0
mycocyclosin biosynthesis	Group 1	0	0	0	0	0	0	0	0	0	0	0	0	0	0	0	0	0	0	0	0	0	0	0	0	0	0	0	0	0	0	0	0	0	0	0	0	0	0	0	0	0	0	0	0	0	0	0	0
sucrose biosynthesis II	Group 1	0	0	0	0	0	0	0	0	0	0	0	0	0	0	0	0	0	0	0	0	0	0	0	0	0	0	0	0	0	0	0	0	0	0	0	0	0	0	0	0	0	0	0	0	0	0	0	0
myo-inositol degradation II	Group 1	0	0	0	0	0	0	0	0	0	0	0	0	0	0	0	0	0	0	0	0	0	0	0	0	0	0	0	0	0	0	0	0	0	0	0	0	0	0	0	0	0	0	0	0	0	0	0	0
pectin degradation II	Group 1	0	0	0	0	0	0	0	0	0	0	0	0	0	0	0	0	0	0	0	0	0	0	0	0	0	0	0	0	0	0	0	0	0	0	0	0	0	0	0	0	0	0	0	0	0	0	0	0
[2Fe-2S] iron-sulfur cluster biosynthesis	Group 1	0	0	0	0	0	0	0	0	0	0	0	0	0	0	0	0	0	0	0	0	0	0	0	0	0	0	0	0	0	0	0	0	0	0	0	0	0	0	0	0	0	0	0	0	0	0	0	0
pentacyclic triterpene biosynthesis	Group 1	0	0	0	0	0	0	0	0	0	0	0	0	0	0	0	0	0	0	0	0	0	0	0	0	0	0	0	0	0	0	0	0	0	0	0	0	0	0	0	0	0	0	0	0	0	0	0	0
luteolinidin 5-O-glucoside biosynthesis	Group 1	0	0	0	0	0	0	0	0	0	0	0	0	0	0	0	0	0	0	0	0	0	0	0	0	0	0	0	0	0	0	0	0	0	0	0	0	0	0	0	0	0	0	0	0	0	0	0	0
apigeninidin 5-O-glucoside biosynthesis	Group 1	0	0	0	0	0	0	0	0	0	0	0	0	0	0	0	0	0	0	0	0	0	0	0	0	0	0	0	0	0	0	0	0	0	0	0	0	0	0	0	0	0	0	0	0	0	0	0	0
ergothioneine biosynthesis I (bacteria)	Group 1	0	0	0	0	0	0	0	0	0	0	0	0	0	0	0	0	0	0	0	0	0	0	0	0	0	0	0	0	0	0	0	0	0	0	0	0	0	0	0	0	0	0	0	0	0	0	0	0
cyanidin diglucoside biosynthesis (acyl-glucose dependent)	Group 1	0	0	0	0	0	0	0	0	0	0	0	0	0	0	0	0	0	0	0	0	0	0	0	0	0	0	0	0	0	0	0	0	0	0	0	0	0	0	0	0	0	0	0	0	0	0	0	0
pelargonidin diglucoside biosynthesis (acyl-glucose dependent)	Group 1	0	0	0	0	0	0	0	0	0	0	0	0	0	0	0	0	0	0	0	0	0	0	0	0	0	0	0	0	0	0	0	0	0	0	0	0	0	0	0	0	0	0	0	0	0	0	0	0
delphinidin diglucoside biosynthesis (acyl-glucose dependent)	Group 1	0	0	0	0	0	0	0	0	0	0	0	0	0	0	0	0	0	0	0	0	0	0	0	0	0	0	0	0	0	0	0	0	0	0	0	0	0	0	0	0	0	0	0	0	0	0	0	0
anthocyanidin 3-malylglucoside biosynthesis (acyl-glucose dependent)	Group 1	0	0	0	0	0	0	0	0	0	0	0	0	0	0	0	0	0	0	0	0	0	0	0	0	0	0	0	0	0	0	0	0	0	0	0	0	0	0	0	0	0	0	0	0	0	0	0	0
rose anthocyanin biosynthesis II (via cyanidin 3-O-beta-D-glucoside)	Group 1	0	0	0	0	0	0	0	0	0	0	0	0	0	0	0	0	0	0	0	0	0	0	0	0	0	0	0	0	0	0	0	0	0	0	0	0	0	0	0	0	0	0	0	0	0	0	0	0
lampranthin biosynthesis	Group 1	0	0	0	0	0	0	0	0	0	0	0	0	0	0	0	0	0	0	0	0	0	0	0	0	0	0	0	0	0	0	0	0	0	0	0	0	0	0	0	0	0	0	0	0	0	0	0	0
anthocyanin biosynthesis (pelargonidin 3-O-glucoside)	Group 1	0	0	0	0	0	0	0	0	0	0	0	0	0	0	0	0	0	0	0	0	0	0	0	0	0	0	0	0	0	0	0	0	0	0	0	0	0	0	0	0	0	0	0	0	0	0	0	0
L-homophenylalanine biosynthesis	Group 1	0	0	0	0	0	0	0	0	0	0	0	0	0	0	0	0	0	0	0	0	0	0	0	0	0	0	0	0	0	0	0	0	0	0	0	0	0	0	0	0	0	0	0	0	0	0	0	0
ternatin C3 biosynthesis	Group 1	0	0	0	0	0	0	0	0	0	0	0	0	0	0	0	0	0	0	0	0	0	0	0	0	0	0	0	0	0	0	0	0	0	0	0	0	0	0	0	0	0	0	0	0	0	0	0	0
4-amino-2-methyl-5-diphosphomethylpyrimidine biosynthesis II	Group 1	0	0	0	0	0	0	0	0	0	0	0	0	0	0	0	0	0	0	0	0	0	0	0	0	0	0	0	0	0	0	0	0	0	0	0	0	0	0	0	0	0	0	0	0	0	0	0	0
methylwyosine biosynthesis	Group 1	0	0	0	0	0	0	0	0	0	0	0	0	0	0	0	0	0	0	0	0	0	0	0	0	0	0	0	0	0	0	0	0	0	0	0	0	0	0	0	0	0	0	0	0	0	0	0	0
7-(3-amino-3-carboxypropyl)-wyosine biosynthesis	Group 1	0	0	0	0	0	0	0	0	0	0	0	0	0	0	0	0	0	0	0	0	0	0	0	0	0	0	0	0	0	0	0	0	0	0	0	0	0	0	0	0	0	0	0	0	0	0	0	0
L-cysteine biosynthesis V (mycobacteria)	Group 1	0	0	0	0	0	0	0	0	0	0	0	0	0	0	0	0	0	0	0	0	0	0	0	0	0	0	0	0	0	0	0	0	0	0	0	0	0	0	0	0	0	0	0	0	0	0	0	0
Escherichia coli serotype O86 O-antigen biosynthesis	Group 1	0	0	0	0	0	0	0	0	0	0	0	0	0	0	0	0	0	0	0	0	0	0	0	0	0	0	0	0	0	0	0	0	0	0	0	0	0	0	0	0	0	0	0	0	0	0	0	0
oleate beta-oxidation (isomerase-dependent, yeast)	Group 1	0	0	0	0	0	0	0	0	0	0	0	0	0	0	0	0	0	0	0	0	0	0	0	0	0	0	0	0	0	0	0	0	0	0	0	0	0	0	0	0	0	0	0	0	0	0	0	0
octopamine biosynthesis	Group 1	0	0	0	0	0	0	0	0	0	0	0	0	0	0	0	0	0	0	0	0	0	0	0	0	0	0	0	0	0	0	0	0	0	0	0	0	0	0	0	0	0	0	0	0	0	0	0	0
nevadensin biosynthesis	Group 1	0	0	0	0	0	0	0	0	0	0	0	0	0	0	0	0	0	0	0	0	0	0	0	0	0	0	0	0	0	0	0	0	0	0	0	0	0	0	0	0	0	0	0	0	0	0	0	0
progesterone biosynthesis	Group 1	0	0	0	0	0	0	0	0	0	0	0	0	0	0	0	0	0	0	0	0	0	0	0	0	0	0	0	0	0	0	0	0	0	0	0	0	0	0	0	0	0	0	0	0	0	0	0	0
ecdysone and 20-hydroxyecdysone biosynthesis	Group 1	0	0	0	0	0	0	0	0	0	0	0	0	0	0	0	0	0	0	0	0	0	0	0	0	0	0	0	0	0	0	0	0	0	0	0	0	0	0	0	0	0	0	0	0	0	0	0	0
3-dimethylallyl-4-hydroxybenzoate biosynthesis	Group 1	0	0	0	0	0	0	0	0	0	0	0	0	0	0	0	0	0	0	0	0	0	0	0	0	0	0	0	0	0	0	0	0	0	0	0	0	0	0	0	0	0	0	0	0	0	0	0	0
3-amino-4,7-dihydroxy-coumarin biosynthesis	Group 1	0	0	0	0	0	0	0	0	0	0	0	0	0	0	0	0	0	0	0	0	0	0	0	0	0	0	0	0	0	0	0	0	0	0	0	0	0	0	0	0	0	0	0	0	0	0	0	0
estradiol biosynthesis II	Group 1	0	0	0	0	0	0	0	0	0	0	0	0	0	0	0	0	0	0	0	0	0	0	0	0	0	0	0	0	0	0	0	0	0	0	0	0	0	0	0	0	0	0	0	0	0	0	0	0
oleate beta-oxidation (reductase-dependent, yeast)	Group 1	0	0	0	0	0	0	0	0	0	0	0	0	0	0	0	0	0	0	0	0	0	0	0	0	0	0	0	0	0	0	0	0	0	0	0	0	0	0	0	0	0	0	0	0	0	0	0	0
acrylonitrile degradation I	Group 1	0	0	0	0	0	0	0	0	0	0	0	0	0	0	0	0	0	0	0	0	0	0	0	0	0	0	0	0	0	0	0	0	0	0	0	0	0	0	0	0	0	0	0	0	0	0	0	0
D-glucosaminate degradation	Group 1	0	0	0	0	0	0	0	0	0	0	0	0	0	0	0	0	0	0	0	0	0	0	0	0	0	0	0	0	0	0	0	0	0	0	0	0	0	0	0	0	0	0	0	0	0	0	0	0
dTDP-beta-D-fucofuranose biosynthesis	Group 1	0	0	0	0	0	0	0	0	0	0	0	0	0	0	0	0	0	0	0	0	0	0	0	0	0	0	0	0	0	0	0	0	0	0	0	0	0	0	0	0	0	0	0	0	0	0	0	0
dTDP-N-acetylviosamine biosynthesis	Group 1	0	0	0	0	0	0	0	0	0	0	0	0	0	0	0	0	0	0	0	0	0	0	0	0	0	0	0	0	0	0	0	0	0	0	0	0	0	0	0	0	0	0	0	0	0	0	0	0
dTDP-3-acetamido-3,6-dideoxy-&alpha;-D-glucose biosynthesis	Group 1	0	0	0	0	0	0	0	0	0	0	0	0	0	0	0	0	0	0	0	0	0	0	0	0	0	0	0	0	0	0	0	0	0	0	0	0	0	0	0	0	0	0	0	0	0	0	0	0
ecdysteroid metabolism (arthropods)	Group 1	0	0	0	0	0	0	0	0	0	0	0	0	0	0	0	0	0	0	0	0	0	0	0	0	0	0	0	0	0	0	0	0	0	0	0	0	0	0	0	0	0	0	0	0	0	0	0	0
salvigenin biosynthesis	Group 1	0	0	0	0	0	0	0	0	0	0	0	0	0	0	0	0	0	0	0	0	0	0	0	0	0	0	0	0	0	0	0	0	0	0	0	0	0	0	0	0	0	0	0	0	0	0	0	0
10-cis-heptadecenoyl-CoA degradation (yeast)	Group 1	0	0	0	0	0	0	0	0	0	0	0	0	0	0	0	0	0	0	0	0	0	0	0	0	0	0	0	0	0	0	0	0	0	0	0	0	0	0	0	0	0	0	0	0	0	0	0	0
10-trans-heptadecenoyl-CoA degradation (reductase-dependent, yeast)	Group 1	0	0	0	0	0	0	0	0	0	0	0	0	0	0	0	0	0	0	0	0	0	0	0	0	0	0	0	0	0	0	0	0	0	0	0	0	0	0	0	0	0	0	0	0	0	0	0	0
10-trans-heptadecenoyl-CoA degradation (MFE-dependent, yeast)	Group 1	0	0	0	0	0	0	0	0	0	0	0	0	0	0	0	0	0	0	0	0	0	0	0	0	0	0	0	0	0	0	0	0	0	0	0	0	0	0	0	0	0	0	0	0	0	0	0	0
sucrose biosynthesis III	Group 1	0	0	0	0	0	0	0	0	0	0	0	0	0	0	0	0	0	0	0	0	0	0	0	0	0	0	0	0	0	0	0	0	0	0	0	0	0	0	0	0	0	0	0	0	0	0	0	0
pyruvate fermentation to opines	Group 1	0	0	0	0	0	0	0	0	0	0	0	0	0	0	0	0	0	0	0	0	0	0	0	0	0	0	0	0	0	0	0	0	0	0	0	0	0	0	0	0	0	0	0	0	0	0	0	0
daunorubicin biosynthesis	Group 1	0	0	0	0	0	0	0	0	0	0	0	0	0	0	0	0	0	0	0	0	0	0	0	0	0	0	0	0	0	0	0	0	0	0	0	0	0	0	0	0	0	0	0	0	0	0	0	0
aclacinomycin biosynthesis	Group 1	0	0	0	0	0	0	0	0	0	0	0	0	0	0	0	0	0	0	0	0	0	0	0	0	0	0	0	0	0	0	0	0	0	0	0	0	0	0	0	0	0	0	0	0	0	0	0	0
doxorubicin biosynthesis	Group 1	0	0	0	0	0	0	0	0	0	0	0	0	0	0	0	0	0	0	0	0	0	0	0	0	0	0	0	0	0	0	0	0	0	0	0	0	0	0	0	0	0	0	0	0	0	0	0	0
jasmonic acid biosynthesis	Group 1	0	0	0	0	0	0	0	0	0	0	0	0	0	0	0	0	0	0	0	0	0	0	0	0	0	0	0	0	0	0	0	0	0	0	0	0	0	0	0	0	0	0	0	0	0	0	0	0
papaverine biosynthesis	Group 1	0	0	0	0	0	0	0	0	0	0	0	0	0	0	0	0	0	0	0	0	0	0	0	0	0	0	0	0	0	0	0	0	0	0	0	0	0	0	0	0	0	0	0	0	0	0	0	0
phosphatidylglycerol degradation	Group 1	0	0	0	0	0	0	0	0	0	0	0	0	0	0	0	0	0	0	0	0	0	0	0	0	0	0	0	0	0	0	0	0	0	0	0	0	0	0	0	0	0	0	0	0	0	0	0	0
phosphatidylcholine resynthesis via glycerophosphocholine	Group 1	0	0	0	0	0	0	0	0	0	0	0	0	0	0	0	0	0	0	0	0	0	0	0	0	0	0	0	0	0	0	0	0	0	0	0	0	0	0	0	0	0	0	0	0	0	0	0	0
thiamine triphosphate metabolism	Group 1	0	0	0	0	0	0	0	0	0	0	0	0	0	0	0	0	0	0	0	0	0	0	0	0	0	0	0	0	0	0	0	0	0	0	0	0	0	0	0	0	0	0	0	0	0	0	0	0
1,4-dihydroxy-6-naphthoate biosynthesis II	Group 1	0	0	0	0	0	0	0	0	0	0	0	0	0	0	0	0	0	0	0	0	0	0	0	0	0	0	0	0	0	0	0	0	0	0	0	0	0	0	0	0	0	0	0	0	0	0	0	0
demethylmenaquinol-6 biosynthesis II	Group 1	0	0	0	0	0	0	0	0	0	0	0	0	0	0	0	0	0	0	0	0	0	0	0	0	0	0	0	0	0	0	0	0	0	0	0	0	0	0	0	0	0	0	0	0	0	0	0	0
1,4-dihydroxy-6-naphthoate biosynthesis I	Group 1	0	0	0	0	0	0	0	0	0	0	0	0	0	0	0	0	0	0	0	0	0	0	0	0	0	0	0	0	0	0	0	0	0	0	0	0	0	0	0	0	0	0	0	0	0	0	0	0
mRNA capping I	Group 1	0	0	0	0	0	0	0	0	0	0	0	0	0	0	0	0	0	0	0	0	0	0	0	0	0	0	0	0	0	0	0	0	0	0	0	0	0	0	0	0	0	0	0	0	0	0	0	0
aminopropanol phosphate biosynthesis II	Group 1	0	0	0	0	0	0	0	0	0	0	0	0	0	0	0	0	0	0	0	0	0	0	0	0	0	0	0	0	0	0	0	0	0	0	0	0	0	0	0	0	0	0	0	0	0	0	0	0
lipoate biosynthesis and incorporation IV (yeast)	Group 1	0	0	0	0	0	0	0	0	0	0	0	0	0	0	0	0	0	0	0	0	0	0	0	0	0	0	0	0	0	0	0	0	0	0	0	0	0	0	0	0	0	0	0	0	0	0	0	0
naringenin biosynthesis (engineered)	Group 1	0	0	0	0	0	0	0	0	0	0	0	0	0	0	0	0	0	0	0	0	0	0	0	0	0	0	0	0	0	0	0	0	0	0	0	0	0	0	0	0	0	0	0	0	0	0	0	0
coumarins biosynthesis (engineered)	Group 1	0	0	0	0	0	0	0	0	0	0	0	0	0	0	0	0	0	0	0	0	0	0	0	0	0	0	0	0	0	0	0	0	0	0	0	0	0	0	0	0	0	0	0	0	0	0	0	0
methylphosphonate degradation II	Group 1	0	0	0	0	0	0	0	0	0	0	0	0	0	0	0	0	0	0	0	0	0	0	0	0	0	0	0	0	0	0	0	0	0	0	0	0	0	0	0	0	0	0	0	0	0	0	0	0
tetramethylpyrazine degradation	Group 1	0	0	0	0	0	0	0	0	0	0	0	0	0	0	0	0	0	0	0	0	0	0	0	0	0	0	0	0	0	0	0	0	0	0	0	0	0	0	0	0	0	0	0	0	0	0	0	0
ceramide phosphoethanolamine biosynthesis	Group 1	0	0	0	0	0	0	0	0	0	0	0	0	0	0	0	0	0	0	0	0	0	0	0	0	0	0	0	0	0	0	0	0	0	0	0	0	0	0	0	0	0	0	0	0	0	0	0	0
aurachin RE biosynthesis	Group 1	0	0	0	0	0	0	0	0	0	0	0	0	0	0	0	0	0	0	0	0	0	0	0	0	0	0	0	0	0	0	0	0	0	0	0	0	0	0	0	0	0	0	0	0	0	0	0	0
aurachin A, B, C and D biosynthesis	Group 1	0	0	0	0	0	0	0	0	0	0	0	0	0	0	0	0	0	0	0	0	0	0	0	0	0	0	0	0	0	0	0	0	0	0	0	0	0	0	0	0	0	0	0	0	0	0	0	0
phospholipid remodeling (phosphatidylethanolamine, yeast)	Group 1	0	0	0	0	0	0	0	0	0	0	0	0	0	0	0	0	0	0	0	0	0	0	0	0	0	0	0	0	0	0	0	0	0	0	0	0	0	0	0	0	0	0	0	0	0	0	0	0
ipsdienol biosynthesis	Group 1	0	0	0	0	0	0	0	0	0	0	0	0	0	0	0	0	0	0	0	0	0	0	0	0	0	0	0	0	0	0	0	0	0	0	0	0	0	0	0	0	0	0	0	0	0	0	0	0
mycinamicin biosynthesis	Group 1	0	0	0	0	0	0	0	0	0	0	0	0	0	0	0	0	0	0	0	0	0	0	0	0	0	0	0	0	0	0	0	0	0	0	0	0	0	0	0	0	0	0	0	0	0	0	0	0
dTDP-6-deoxy-&alpha;-D-allose biosynthesis	Group 1	0	0	0	0	0	0	0	0	0	0	0	0	0	0	0	0	0	0	0	0	0	0	0	0	0	0	0	0	0	0	0	0	0	0	0	0	0	0	0	0	0	0	0	0	0	0	0	0
dTDP-&alpha;-D-mycaminose biosynthesis	Group 1	0	0	0	0	0	0	0	0	0	0	0	0	0	0	0	0	0	0	0	0	0	0	0	0	0	0	0	0	0	0	0	0	0	0	0	0	0	0	0	0	0	0	0	0	0	0	0	0
tylosin biosynthesis	Group 1	0	0	0	0	0	0	0	0	0	0	0	0	0	0	0	0	0	0	0	0	0	0	0	0	0	0	0	0	0	0	0	0	0	0	0	0	0	0	0	0	0	0	0	0	0	0	0	0
phospholipid remodeling (phosphatidylcholine, yeast)	Group 1	0	0	0	0	0	0	0	0	0	0	0	0	0	0	0	0	0	0	0	0	0	0	0	0	0	0	0	0	0	0	0	0	0	0	0	0	0	0	0	0	0	0	0	0	0	0	0	0
FR-900098 and FR-33289 antibiotics biosynthesis	Group 1	0	0	0	0	0	0	0	0	0	0	0	0	0	0	0	0	0	0	0	0	0	0	0	0	0	0	0	0	0	0	0	0	0	0	0	0	0	0	0	0	0	0	0	0	0	0	0	0
p-cymene degradation to p-cumate	Group 1	0	0	0	0	0	0	0	0	0	0	0	0	0	0	0	0	0	0	0	0	0	0	0	0	0	0	0	0	0	0	0	0	0	0	0	0	0	0	0	0	0	0	0	0	0	0	0	0
monoacylglycerol metabolism (yeast)	Group 1	0	0	0	0	0	0	0	0	0	0	0	0	0	0	0	0	0	0	0	0	0	0	0	0	0	0	0	0	0	0	0	0	0	0	0	0	0	0	0	0	0	0	0	0	0	0	0	0
narbomycin, pikromycin and novapikromycin biosynthesis	Group 1	0	0	0	0	0	0	0	0	0	0	0	0	0	0	0	0	0	0	0	0	0	0	0	0	0	0	0	0	0	0	0	0	0	0	0	0	0	0	0	0	0	0	0	0	0	0	0	0
methymycin, neomethymycin and novamethymycin biosynthesis	Group 1	0	0	0	0	0	0	0	0	0	0	0	0	0	0	0	0	0	0	0	0	0	0	0	0	0	0	0	0	0	0	0	0	0	0	0	0	0	0	0	0	0	0	0	0	0	0	0	0
bombykol biosynthesis	Group 1	0	0	0	0	0	0	0	0	0	0	0	0	0	0	0	0	0	0	0	0	0	0	0	0	0	0	0	0	0	0	0	0	0	0	0	0	0	0	0	0	0	0	0	0	0	0	0	0
sterol:steryl ester interconversion (yeast)	Group 1	0	0	0	0	0	0	0	0	0	0	0	0	0	0	0	0	0	0	0	0	0	0	0	0	0	0	0	0	0	0	0	0	0	0	0	0	0	0	0	0	0	0	0	0	0	0	0	0
complex N-linked glycan biosynthesis (vertebrates)	Group 1	0	0	0	0	0	0	0	0	0	0	0	0	0	0	0	0	0	0	0	0	0	0	0	0	0	0	0	0	0	0	0	0	0	0	0	0	0	0	0	0	0	0	0	0	0	0	0	0
2-chloroacrylate degradation II	Group 1	0	0	0	0	0	0	0	0	0	0	0	0	0	0	0	0	0	0	0	0	0	0	0	0	0	0	0	0	0	0	0	0	0	0	0	0	0	0	0	0	0	0	0	0	0	0	0	0
arsenite oxidation II (respiratory)	Group 1	0	0	0	0	0	0	0	0	0	0	0	0	0	0	0	0	0	0	0	0	0	0	0	0	0	0	0	0	0	0	0	0	0	0	0	0	0	0	0	0	0	0	0	0	0	0	0	0
indole degradation to anthranil and anthranilate	Group 1	0	0	0	0	0	0	0	0	0	0	0	0	0	0	0	0	0	0	0	0	0	0	0	0	0	0	0	0	0	0	0	0	0	0	0	0	0	0	0	0	0	0	0	0	0	0	0	0
aromatic biogenic amine degradation (bacteria)	Group 1	0	0	0	0	0	0	0	0	0	0	0	0	0	0	0	0	0	0	0	0	0	0	0	0	0	0	0	0	0	0	0	0	0	0	0	0	0	0	0	0	0	0	0	0	0	0	0	0
mucin core 1 and core 2 O-glycosylation	Group 1	0	0	0	0	0	0	0	0	0	0	0	0	0	0	0	0	0	0	0	0	0	0	0	0	0	0	0	0	0	0	0	0	0	0	0	0	0	0	0	0	0	0	0	0	0	0	0	0
mucin core 3 and core 4 O-glycosylation	Group 1	0	0	0	0	0	0	0	0	0	0	0	0	0	0	0	0	0	0	0	0	0	0	0	0	0	0	0	0	0	0	0	0	0	0	0	0	0	0	0	0	0	0	0	0	0	0	0	0
vitamin E biosynthesis (tocotrienols)	Group 1	0	0	0	0	0	0	0	0	0	0	0	0	0	0	0	0	0	0	0	0	0	0	0	0	0	0	0	0	0	0	0	0	0	0	0	0	0	0	0	0	0	0	0	0	0	0	0	0
protein O-[N-acetyl]-glucosylation	Group 1	0	0	0	0	0	0	0	0	0	0	0	0	0	0	0	0	0	0	0	0	0	0	0	0	0	0	0	0	0	0	0	0	0	0	0	0	0	0	0	0	0	0	0	0	0	0	0	0
dTDP-beta-L-evernitrose biosynthesis	Group 1	0	0	0	0	0	0	0	0	0	0	0	0	0	0	0	0	0	0	0	0	0	0	0	0	0	0	0	0	0	0	0	0	0	0	0	0	0	0	0	0	0	0	0	0	0	0	0	0
thiocyanate degradation II	Group 1	0	0	0	0	0	0	0	0	0	0	0	0	0	0	0	0	0	0	0	0	0	0	0	0	0	0	0	0	0	0	0	0	0	0	0	0	0	0	0	0	0	0	0	0	0	0	0	0
dTDP-beta-L-4-epi-vancosamine biosynthesis	Group 1	0	0	0	0	0	0	0	0	0	0	0	0	0	0	0	0	0	0	0	0	0	0	0	0	0	0	0	0	0	0	0	0	0	0	0	0	0	0	0	0	0	0	0	0	0	0	0	0
drosopterin and aurodrosopterin biosynthesis	Group 1	0	0	0	0	0	0	0	0	0	0	0	0	0	0	0	0	0	0	0	0	0	0	0	0	0	0	0	0	0	0	0	0	0	0	0	0	0	0	0	0	0	0	0	0	0	0	0	0
(4S)-carvone biosynthesis	Group 1	0	0	0	0	0	0	0	0	0	0	0	0	0	0	0	0	0	0	0	0	0	0	0	0	0	0	0	0	0	0	0	0	0	0	0	0	0	0	0	0	0	0	0	0	0	0	0	0
luteolin triglucuronide biosynthesis	Group 1	0	0	0	0	0	0	0	0	0	0	0	0	0	0	0	0	0	0	0	0	0	0	0	0	0	0	0	0	0	0	0	0	0	0	0	0	0	0	0	0	0	0	0	0	0	0	0	0
luteolin triglucuronide degradation	Group 1	0	0	0	0	0	0	0	0	0	0	0	0	0	0	0	0	0	0	0	0	0	0	0	0	0	0	0	0	0	0	0	0	0	0	0	0	0	0	0	0	0	0	0	0	0	0	0	0
2-aminoethylphosphonate degradation III	Group 1	0	0	0	0	0	0	0	0	0	0	0	0	0	0	0	0	0	0	0	0	0	0	0	0	0	0	0	0	0	0	0	0	0	0	0	0	0	0	0	0	0	0	0	0	0	0	0	0
galloylated catechin biosynthesis	Group 1	0	0	0	0	0	0	0	0	0	0	0	0	0	0	0	0	0	0	0	0	0	0	0	0	0	0	0	0	0	0	0	0	0	0	0	0	0	0	0	0	0	0	0	0	0	0	0	0
acylated cyanidin galactoside biosynthesis	Group 1	0	0	0	0	0	0	0	0	0	0	0	0	0	0	0	0	0	0	0	0	0	0	0	0	0	0	0	0	0	0	0	0	0	0	0	0	0	0	0	0	0	0	0	0	0	0	0	0
anthocyanidin modification (Arabidopsis)	Group 1	0	0	0	0	0	0	0	0	0	0	0	0	0	0	0	0	0	0	0	0	0	0	0	0	0	0	0	0	0	0	0	0	0	0	0	0	0	0	0	0	0	0	0	0	0	0	0	0
cyanidin dimalonylglucoside biosynthesis	Group 1	0	0	0	0	0	0	0	0	0	0	0	0	0	0	0	0	0	0	0	0	0	0	0	0	0	0	0	0	0	0	0	0	0	0	0	0	0	0	0	0	0	0	0	0	0	0	0	0
allopregnanolone biosynthesis	Group 1	0	0	0	0	0	0	0	0	0	0	0	0	0	0	0	0	0	0	0	0	0	0	0	0	0	0	0	0	0	0	0	0	0	0	0	0	0	0	0	0	0	0	0	0	0	0	0	0
beta-(1,4)-mannan degradation	Group 1	0	0	0	0	0	0	0	0	0	0	0	0	0	0	0	0	0	0	0	0	0	0	0	0	0	0	0	0	0	0	0	0	0	0	0	0	0	0	0	0	0	0	0	0	0	0	0	0
sulfite oxidation V (SoeABC)	Group 1	0	0	0	0	0	0	0	0	0	0	0	0	0	0	0	0	0	0	0	0	0	0	0	0	0	0	0	0	0	0	0	0	0	0	0	0	0	0	0	0	0	0	0	0	0	0	0	0
violdelphin biosynthesis	Group 1	0	0	0	0	0	0	0	0	0	0	0	0	0	0	0	0	0	0	0	0	0	0	0	0	0	0	0	0	0	0	0	0	0	0	0	0	0	0	0	0	0	0	0	0	0	0	0	0
2-O-acetyl-3-O-trans-coutarate biosynthesis	Group 1	0	0	0	0	0	0	0	0	0	0	0	0	0	0	0	0	0	0	0	0	0	0	0	0	0	0	0	0	0	0	0	0	0	0	0	0	0	0	0	0	0	0	0	0	0	0	0	0
hydroxycinnamate sugar acid ester biosynthesis	Group 1	0	0	0	0	0	0	0	0	0	0	0	0	0	0	0	0	0	0	0	0	0	0	0	0	0	0	0	0	0	0	0	0	0	0	0	0	0	0	0	0	0	0	0	0	0	0	0	0
N-methylanthraniloyl-beta-D-glucopyranose biosynthesis	Group 1	0	0	0	0	0	0	0	0	0	0	0	0	0	0	0	0	0	0	0	0	0	0	0	0	0	0	0	0	0	0	0	0	0	0	0	0	0	0	0	0	0	0	0	0	0	0	0	0
cyanidin 3,7-diglucoside polyacylation biosynthesis	Group 1	0	0	0	0	0	0	0	0	0	0	0	0	0	0	0	0	0	0	0	0	0	0	0	0	0	0	0	0	0	0	0	0	0	0	0	0	0	0	0	0	0	0	0	0	0	0	0	0
acetone degradation III (to propane-1,2-diol)	Group 1	0	0	0	0	0	0	0	0	0	0	0	0	0	0	0	0	0	0	0	0	0	0	0	0	0	0	0	0	0	0	0	0	0	0	0	0	0	0	0	0	0	0	0	0	0	0	0	0
2-acetamido-4-amino-2,4,6-trideoxy-&alpha;-D-galactosyl-diphospho-ditrans,octacis-undecaprenol biosynthesis	Group 1	0	0	0	0	0	0	0	0	0	0	0	0	0	0	0	0	0	0	0	0	0	0	0	0	0	0	0	0	0	0	0	0	0	0	0	0	0	0	0	0	0	0	0	0	0	0	0	0
benzoyl-beta-D-glucopyranose biosynthesis	Group 1	0	0	0	0	0	0	0	0	0	0	0	0	0	0	0	0	0	0	0	0	0	0	0	0	0	0	0	0	0	0	0	0	0	0	0	0	0	0	0	0	0	0	0	0	0	0	0	0
phosphatidylcholine biosynthesis VII	Group 1	0	0	0	0	0	0	0	0	0	0	0	0	0	0	0	0	0	0	0	0	0	0	0	0	0	0	0	0	0	0	0	0	0	0	0	0	0	0	0	0	0	0	0	0	0	0	0	0
D-carnitine degradation I	Group 1	0	0	0	0	0	0	0	0	0	0	0	0	0	0	0	0	0	0	0	0	0	0	0	0	0	0	0	0	0	0	0	0	0	0	0	0	0	0	0	0	0	0	0	0	0	0	0	0
D-carnitine degradation II	Group 1	0	0	0	0	0	0	0	0	0	0	0	0	0	0	0	0	0	0	0	0	0	0	0	0	0	0	0	0	0	0	0	0	0	0	0	0	0	0	0	0	0	0	0	0	0	0	0	0
avenacin A-1 biosynthesis	Group 1	0	0	0	0	0	0	0	0	0	0	0	0	0	0	0	0	0	0	0	0	0	0	0	0	0	0	0	0	0	0	0	0	0	0	0	0	0	0	0	0	0	0	0	0	0	0	0	0
avenacin A-2 biosynthesis	Group 1	0	0	0	0	0	0	0	0	0	0	0	0	0	0	0	0	0	0	0	0	0	0	0	0	0	0	0	0	0	0	0	0	0	0	0	0	0	0	0	0	0	0	0	0	0	0	0	0
des-methyl avenacin A-1 biosynthesis	Group 1	0	0	0	0	0	0	0	0	0	0	0	0	0	0	0	0	0	0	0	0	0	0	0	0	0	0	0	0	0	0	0	0	0	0	0	0	0	0	0	0	0	0	0	0	0	0	0	0
momilactone A biosynthesis	Group 1	0	0	0	0	0	0	0	0	0	0	0	0	0	0	0	0	0	0	0	0	0	0	0	0	0	0	0	0	0	0	0	0	0	0	0	0	0	0	0	0	0	0	0	0	0	0	0	0
oryzalexin D and E biosynthesis	Group 1	0	0	0	0	0	0	0	0	0	0	0	0	0	0	0	0	0	0	0	0	0	0	0	0	0	0	0	0	0	0	0	0	0	0	0	0	0	0	0	0	0	0	0	0	0	0	0	0
2,3-dihydroxybenzoate degradation	Group 1	0	0	0	0	0	0	0	0	0	0	0	0	0	0	0	0	0	0	0	0	0	0	0	0	0	0	0	0	0	0	0	0	0	0	0	0	0	0	0	0	0	0	0	0	0	0	0	0
oryzalide A biosynthesis	Group 1	0	0	0	0	0	0	0	0	0	0	0	0	0	0	0	0	0	0	0	0	0	0	0	0	0	0	0	0	0	0	0	0	0	0	0	0	0	0	0	0	0	0	0	0	0	0	0	0
cyclooctatin biosynthesis	Group 1	0	0	0	0	0	0	0	0	0	0	0	0	0	0	0	0	0	0	0	0	0	0	0	0	0	0	0	0	0	0	0	0	0	0	0	0	0	0	0	0	0	0	0	0	0	0	0	0
elloramycin biosynthesis	Group 1	0	0	0	0	0	0	0	0	0	0	0	0	0	0	0	0	0	0	0	0	0	0	0	0	0	0	0	0	0	0	0	0	0	0	0	0	0	0	0	0	0	0	0	0	0	0	0	0
phytocassanes biosynthesis, shared reactions	Group 1	0	0	0	0	0	0	0	0	0	0	0	0	0	0	0	0	0	0	0	0	0	0	0	0	0	0	0	0	0	0	0	0	0	0	0	0	0	0	0	0	0	0	0	0	0	0	0	0
tetracenomycin C biosynthesis	Group 1	0	0	0	0	0	0	0	0	0	0	0	0	0	0	0	0	0	0	0	0	0	0	0	0	0	0	0	0	0	0	0	0	0	0	0	0	0	0	0	0	0	0	0	0	0	0	0	0
(+)-secoisolariciresinol diglucoside biosynthesis	Group 1	0	0	0	0	0	0	0	0	0	0	0	0	0	0	0	0	0	0	0	0	0	0	0	0	0	0	0	0	0	0	0	0	0	0	0	0	0	0	0	0	0	0	0	0	0	0	0	0
oryzalexin A, B, and C biosynthesis	Group 1	0	0	0	0	0	0	0	0	0	0	0	0	0	0	0	0	0	0	0	0	0	0	0	0	0	0	0	0	0	0	0	0	0	0	0	0	0	0	0	0	0	0	0	0	0	0	0	0
patulin biosynthesis	Group 1	0	0	0	0	0	0	0	0	0	0	0	0	0	0	0	0	0	0	0	0	0	0	0	0	0	0	0	0	0	0	0	0	0	0	0	0	0	0	0	0	0	0	0	0	0	0	0	0
podophyllotoxin glucosides metabolism	Group 1	0	0	0	0	0	0	0	0	0	0	0	0	0	0	0	0	0	0	0	0	0	0	0	0	0	0	0	0	0	0	0	0	0	0	0	0	0	0	0	0	0	0	0	0	0	0	0	0
paspaline biosynthesis	Group 1	0	0	0	0	0	0	0	0	0	0	0	0	0	0	0	0	0	0	0	0	0	0	0	0	0	0	0	0	0	0	0	0	0	0	0	0	0	0	0	0	0	0	0	0	0	0	0	0
paxilline and diprenylpaxilline biosynthesis	Group 1	0	0	0	0	0	0	0	0	0	0	0	0	0	0	0	0	0	0	0	0	0	0	0	0	0	0	0	0	0	0	0	0	0	0	0	0	0	0	0	0	0	0	0	0	0	0	0	0
gossypetin metabolism	Group 1	0	0	0	0	0	0	0	0	0	0	0	0	0	0	0	0	0	0	0	0	0	0	0	0	0	0	0	0	0	0	0	0	0	0	0	0	0	0	0	0	0	0	0	0	0	0	0	0
3beta-hydroxysesquiterpene lactone biosynthesis	Group 1	0	0	0	0	0	0	0	0	0	0	0	0	0	0	0	0	0	0	0	0	0	0	0	0	0	0	0	0	0	0	0	0	0	0	0	0	0	0	0	0	0	0	0	0	0	0	0	0
phenylpropanoids methylation (ice plant)	Group 1	0	0	0	0	0	0	0	0	0	0	0	0	0	0	0	0	0	0	0	0	0	0	0	0	0	0	0	0	0	0	0	0	0	0	0	0	0	0	0	0	0	0	0	0	0	0	0	0
phosphatidylserine biosynthesis I	Group 1	0	0	0	0	0	0	0	0	0	0	0	0	0	0	0	0	0	0	0	0	0	0	0	0	0	0	0	0	0	0	0	0	0	0	0	0	0	0	0	0	0	0	0	0	0	0	0	0
chelerythrine biosynthesis	Group 1	0	0	0	0	0	0	0	0	0	0	0	0	0	0	0	0	0	0	0	0	0	0	0	0	0	0	0	0	0	0	0	0	0	0	0	0	0	0	0	0	0	0	0	0	0	0	0	0
rhizocticin A and B biosynthesis	Group 1	0	0	0	0	0	0	0	0	0	0	0	0	0	0	0	0	0	0	0	0	0	0	0	0	0	0	0	0	0	0	0	0	0	0	0	0	0	0	0	0	0	0	0	0	0	0	0	0
protein ubiquitination	Group 1	0	0	0	0	0	0	0	0	0	0	0	0	0	0	0	0	0	0	0	0	0	0	0	0	0	0	0	0	0	0	0	0	0	0	0	0	0	0	0	0	0	0	0	0	0	0	0	0
3,5,6-trichloro-2-pyridinol degradation	Group 1	0	0	0	0	0	0	0	0	0	0	0	0	0	0	0	0	0	0	0	0	0	0	0	0	0	0	0	0	0	0	0	0	0	0	0	0	0	0	0	0	0	0	0	0	0	0	0	0
flaviolin dimer and mompain biosynthesis	Group 1	0	0	0	0	0	0	0	0	0	0	0	0	0	0	0	0	0	0	0	0	0	0	0	0	0	0	0	0	0	0	0	0	0	0	0	0	0	0	0	0	0	0	0	0	0	0	0	0
L-tyrosine degradation IV (to 4-methylphenol)	Group 1	0	0	0	0	0	0	0	0	0	0	0	0	0	0	0	0	0	0	0	0	0	0	0	0	0	0	0	0	0	0	0	0	0	0	0	0	0	0	0	0	0	0	0	0	0	0	0	0
brassicicene C biosynthesis	Group 1	0	0	0	0	0	0	0	0	0	0	0	0	0	0	0	0	0	0	0	0	0	0	0	0	0	0	0	0	0	0	0	0	0	0	0	0	0	0	0	0	0	0	0	0	0	0	0	0
atromentin biosynthesis	Group 1	0	0	0	0	0	0	0	0	0	0	0	0	0	0	0	0	0	0	0	0	0	0	0	0	0	0	0	0	0	0	0	0	0	0	0	0	0	0	0	0	0	0	0	0	0	0	0	0
terrequinone A biosynthesis	Group 1	0	0	0	0	0	0	0	0	0	0	0	0	0	0	0	0	0	0	0	0	0	0	0	0	0	0	0	0	0	0	0	0	0	0	0	0	0	0	0	0	0	0	0	0	0	0	0	0
3-(4-sulfophenyl)butanoate degradation	Group 1	0	0	0	0	0	0	0	0	0	0	0	0	0	0	0	0	0	0	0	0	0	0	0	0	0	0	0	0	0	0	0	0	0	0	0	0	0	0	0	0	0	0	0	0	0	0	0	0
(R)-canadine biosynthesis	Group 1	0	0	0	0	0	0	0	0	0	0	0	0	0	0	0	0	0	0	0	0	0	0	0	0	0	0	0	0	0	0	0	0	0	0	0	0	0	0	0	0	0	0	0	0	0	0	0	0
mevalonate pathway III (Thermoplasma)	Group 1	0	0	0	0	0	0	0	0	0	0	0	0	0	0	0	0	0	0	0	0	0	0	0	0	0	0	0	0	0	0	0	0	0	0	0	0	0	0	0	0	0	0	0	0	0	0	0	0
fumitremorgin C biosynthesis	Group 1	0	0	0	0	0	0	0	0	0	0	0	0	0	0	0	0	0	0	0	0	0	0	0	0	0	0	0	0	0	0	0	0	0	0	0	0	0	0	0	0	0	0	0	0	0	0	0	0
fumitremorgin A biosynthesis	Group 1	0	0	0	0	0	0	0	0	0	0	0	0	0	0	0	0	0	0	0	0	0	0	0	0	0	0	0	0	0	0	0	0	0	0	0	0	0	0	0	0	0	0	0	0	0	0	0	0
CMP-N-acetyl-7-O-acetylneuraminate biosynthesis	Group 1	0	0	0	0	0	0	0	0	0	0	0	0	0	0	0	0	0	0	0	0	0	0	0	0	0	0	0	0	0	0	0	0	0	0	0	0	0	0	0	0	0	0	0	0	0	0	0	0
beta-D-galactosaminyl-(1&rarr;3)-N-acetyl-&alpha;-D-galactosamine biosynthesis	Group 1	0	0	0	0	0	0	0	0	0	0	0	0	0	0	0	0	0	0	0	0	0	0	0	0	0	0	0	0	0	0	0	0	0	0	0	0	0	0	0	0	0	0	0	0	0	0	0	0
mannojirimycin biosynthesis	Group 1	0	0	0	0	0	0	0	0	0	0	0	0	0	0	0	0	0	0	0	0	0	0	0	0	0	0	0	0	0	0	0	0	0	0	0	0	0	0	0	0	0	0	0	0	0	0	0	0
acetylaszonalenin biosynthesis	Group 1	0	0	0	0	0	0	0	0	0	0	0	0	0	0	0	0	0	0	0	0	0	0	0	0	0	0	0	0	0	0	0	0	0	0	0	0	0	0	0	0	0	0	0	0	0	0	0	0
gliotoxin biosynthesis	Group 1	0	0	0	0	0	0	0	0	0	0	0	0	0	0	0	0	0	0	0	0	0	0	0	0	0	0	0	0	0	0	0	0	0	0	0	0	0	0	0	0	0	0	0	0	0	0	0	0
gliotoxin inactivation	Group 1	0	0	0	0	0	0	0	0	0	0	0	0	0	0	0	0	0	0	0	0	0	0	0	0	0	0	0	0	0	0	0	0	0	0	0	0	0	0	0	0	0	0	0	0	0	0	0	0
lovastatin biosynthesis	Group 1	0	0	0	0	0	0	0	0	0	0	0	0	0	0	0	0	0	0	0	0	0	0	0	0	0	0	0	0	0	0	0	0	0	0	0	0	0	0	0	0	0	0	0	0	0	0	0	0
6-hydroxymethyl-dihydropterin diphosphate biosynthesis III (Chlamydia)	Group 1	0	0	0	0	0	0	0	0	0	0	0	0	0	0	0	0	0	0	0	0	0	0	0	0	0	0	0	0	0	0	0	0	0	0	0	0	0	0	0	0	0	0	0	0	0	0	0	0
aflatrem biosynthesis	Group 1	0	0	0	0	0	0	0	0	0	0	0	0	0	0	0	0	0	0	0	0	0	0	0	0	0	0	0	0	0	0	0	0	0	0	0	0	0	0	0	0	0	0	0	0	0	0	0	0
fumiquinazoline D biosynthesis	Group 1	0	0	0	0	0	0	0	0	0	0	0	0	0	0	0	0	0	0	0	0	0	0	0	0	0	0	0	0	0	0	0	0	0	0	0	0	0	0	0	0	0	0	0	0	0	0	0	0
5-N-acetylardeemin biosynthesis	Group 1	0	0	0	0	0	0	0	0	0	0	0	0	0	0	0	0	0	0	0	0	0	0	0	0	0	0	0	0	0	0	0	0	0	0	0	0	0	0	0	0	0	0	0	0	0	0	0	0
diphthamide biosynthesis II (eukaryotes)	Group 1	0	0	0	0	0	0	0	0	0	0	0	0	0	0	0	0	0	0	0	0	0	0	0	0	0	0	0	0	0	0	0	0	0	0	0	0	0	0	0	0	0	0	0	0	0	0	0	0
asperlicin E biosynthesis	Group 1	0	0	0	0	0	0	0	0	0	0	0	0	0	0	0	0	0	0	0	0	0	0	0	0	0	0	0	0	0	0	0	0	0	0	0	0	0	0	0	0	0	0	0	0	0	0	0	0
ergothioneine biosynthesis II (fungi)	Group 1	0	0	0	0	0	0	0	0	0	0	0	0	0	0	0	0	0	0	0	0	0	0	0	0	0	0	0	0	0	0	0	0	0	0	0	0	0	0	0	0	0	0	0	0	0	0	0	0
heme b biosynthesis III (from siroheme)	Group 1	0	0	0	0	0	0	0	0	0	0	0	0	0	0	0	0	0	0	0	0	0	0	0	0	0	0	0	0	0	0	0	0	0	0	0	0	0	0	0	0	0	0	0	0	0	0	0	0
heme d1 biosynthesis	Group 1	0	0	0	0	0	0	0	0	0	0	0	0	0	0	0	0	0	0	0	0	0	0	0	0	0	0	0	0	0	0	0	0	0	0	0	0	0	0	0	0	0	0	0	0	0	0	0	0
&alpha;-cyclopiazonate biosynthesis	Group 1	0	0	0	0	0	0	0	0	0	0	0	0	0	0	0	0	0	0	0	0	0	0	0	0	0	0	0	0	0	0	0	0	0	0	0	0	0	0	0	0	0	0	0	0	0	0	0	0
(-)-microperfuranone biosynthesis	Group 1	0	0	0	0	0	0	0	0	0	0	0	0	0	0	0	0	0	0	0	0	0	0	0	0	0	0	0	0	0	0	0	0	0	0	0	0	0	0	0	0	0	0	0	0	0	0	0	0
&alpha;-cyclopiazonate detoxification	Group 1	0	0	0	0	0	0	0	0	0	0	0	0	0	0	0	0	0	0	0	0	0	0	0	0	0	0	0	0	0	0	0	0	0	0	0	0	0	0	0	0	0	0	0	0	0	0	0	0
tenellin biosynthesis	Group 1	0	0	0	0	0	0	0	0	0	0	0	0	0	0	0	0	0	0	0	0	0	0	0	0	0	0	0	0	0	0	0	0	0	0	0	0	0	0	0	0	0	0	0	0	0	0	0	0
3,6-anhydro-&alpha;-L-galactopyranose degradation	Group 1	0	0	0	0	0	0	0	0	0	0	0	0	0	0	0	0	0	0	0	0	0	0	0	0	0	0	0	0	0	0	0	0	0	0	0	0	0	0	0	0	0	0	0	0	0	0	0	0
bassianin and desmethylbassianin biosynthesis	Group 1	0	0	0	0	0	0	0	0	0	0	0	0	0	0	0	0	0	0	0	0	0	0	0	0	0	0	0	0	0	0	0	0	0	0	0	0	0	0	0	0	0	0	0	0	0	0	0	0
bacimethrin and bacimethrin pyrophosphate biosynthesis	Group 1	0	0	0	0	0	0	0	0	0	0	0	0	0	0	0	0	0	0	0	0	0	0	0	0	0	0	0	0	0	0	0	0	0	0	0	0	0	0	0	0	0	0	0	0	0	0	0	0
aspyridone A biosynthesis	Group 1	0	0	0	0	0	0	0	0	0	0	0	0	0	0	0	0	0	0	0	0	0	0	0	0	0	0	0	0	0	0	0	0	0	0	0	0	0	0	0	0	0	0	0	0	0	0	0	0
arginomycin biosynthesis	Group 1	0	0	0	0	0	0	0	0	0	0	0	0	0	0	0	0	0	0	0	0	0	0	0	0	0	0	0	0	0	0	0	0	0	0	0	0	0	0	0	0	0	0	0	0	0	0	0	0
blasticidin S biosynthesis	Group 1	0	0	0	0	0	0	0	0	0	0	0	0	0	0	0	0	0	0	0	0	0	0	0	0	0	0	0	0	0	0	0	0	0	0	0	0	0	0	0	0	0	0	0	0	0	0	0	0
ferrichrome A biosynthesis	Group 1	0	0	0	0	0	0	0	0	0	0	0	0	0	0	0	0	0	0	0	0	0	0	0	0	0	0	0	0	0	0	0	0	0	0	0	0	0	0	0	0	0	0	0	0	0	0	0	0
lolitrem B biosynthesis	Group 1	0	0	0	0	0	0	0	0	0	0	0	0	0	0	0	0	0	0	0	0	0	0	0	0	0	0	0	0	0	0	0	0	0	0	0	0	0	0	0	0	0	0	0	0	0	0	0	0
GDP-mycosamine biosynthesis	Group 1	0	0	0	0	0	0	0	0	0	0	0	0	0	0	0	0	0	0	0	0	0	0	0	0	0	0	0	0	0	0	0	0	0	0	0	0	0	0	0	0	0	0	0	0	0	0	0	0
ferrichrome biosynthesis	Group 1	0	0	0	0	0	0	0	0	0	0	0	0	0	0	0	0	0	0	0	0	0	0	0	0	0	0	0	0	0	0	0	0	0	0	0	0	0	0	0	0	0	0	0	0	0	0	0	0
phycoviolobilin biosynthesis	Group 1	0	0	0	0	0	0	0	0	0	0	0	0	0	0	0	0	0	0	0	0	0	0	0	0	0	0	0	0	0	0	0	0	0	0	0	0	0	0	0	0	0	0	0	0	0	0	0	0
phycourobilin biosynthesis	Group 1	0	0	0	0	0	0	0	0	0	0	0	0	0	0	0	0	0	0	0	0	0	0	0	0	0	0	0	0	0	0	0	0	0	0	0	0	0	0	0	0	0	0	0	0	0	0	0	0
phycoerythrobilin biosynthesis II	Group 1	0	0	0	0	0	0	0	0	0	0	0	0	0	0	0	0	0	0	0	0	0	0	0	0	0	0	0	0	0	0	0	0	0	0	0	0	0	0	0	0	0	0	0	0	0	0	0	0
arachidonate biosynthesis II (bacteria)	Group 1	0	0	0	0	0	0	0	0	0	0	0	0	0	0	0	0	0	0	0	0	0	0	0	0	0	0	0	0	0	0	0	0	0	0	0	0	0	0	0	0	0	0	0	0	0	0	0	0
beta-1,4-D-mannosyl-N-acetyl-D-glucosamine degradation	Group 1	0	0	0	0	0	0	0	0	0	0	0	0	0	0	0	0	0	0	0	0	0	0	0	0	0	0	0	0	0	0	0	0	0	0	0	0	0	0	0	0	0	0	0	0	0	0	0	0
oleate biosynthesis III (cyanobacteria)	Group 1	0	0	0	0	0	0	0	0	0	0	0	0	0	0	0	0	0	0	0	0	0	0	0	0	0	0	0	0	0	0	0	0	0	0	0	0	0	0	0	0	0	0	0	0	0	0	0	0
ursodeoxycholate biosynthesis (bacteria)	Group 1	0	0	0	0	0	0	0	0	0	0	0	0	0	0	0	0	0	0	0	0	0	0	0	0	0	0	0	0	0	0	0	0	0	0	0	0	0	0	0	0	0	0	0	0	0	0	0	0
palmitoleate biosynthesis III (cyanobacteria)	Group 1	0	0	0	0	0	0	0	0	0	0	0	0	0	0	0	0	0	0	0	0	0	0	0	0	0	0	0	0	0	0	0	0	0	0	0	0	0	0	0	0	0	0	0	0	0	0	0	0
(7Z,10Z,13Z)-hexadecatrienoate biosynthesis	Group 1	0	0	0	0	0	0	0	0	0	0	0	0	0	0	0	0	0	0	0	0	0	0	0	0	0	0	0	0	0	0	0	0	0	0	0	0	0	0	0	0	0	0	0	0	0	0	0	0
okenone biosynthesis	Group 1	0	0	0	0	0	0	0	0	0	0	0	0	0	0	0	0	0	0	0	0	0	0	0	0	0	0	0	0	0	0	0	0	0	0	0	0	0	0	0	0	0	0	0	0	0	0	0	0
gamma-linolenate biosynthesis III (cyanobacteria)	Group 1	0	0	0	0	0	0	0	0	0	0	0	0	0	0	0	0	0	0	0	0	0	0	0	0	0	0	0	0	0	0	0	0	0	0	0	0	0	0	0	0	0	0	0	0	0	0	0	0
stearidonate biosynthesis (cyanobacteria)	Group 1	0	0	0	0	0	0	0	0	0	0	0	0	0	0	0	0	0	0	0	0	0	0	0	0	0	0	0	0	0	0	0	0	0	0	0	0	0	0	0	0	0	0	0	0	0	0	0	0
&alpha;-linolenate biosynthesis II (cyanobacteria)	Group 1	0	0	0	0	0	0	0	0	0	0	0	0	0	0	0	0	0	0	0	0	0	0	0	0	0	0	0	0	0	0	0	0	0	0	0	0	0	0	0	0	0	0	0	0	0	0	0	0
anditomin biosynthesis	Group 1	0	0	0	0	0	0	0	0	0	0	0	0	0	0	0	0	0	0	0	0	0	0	0	0	0	0	0	0	0	0	0	0	0	0	0	0	0	0	0	0	0	0	0	0	0	0	0	0
peramine biosynthesis	Group 1	0	0	0	0	0	0	0	0	0	0	0	0	0	0	0	0	0	0	0	0	0	0	0	0	0	0	0	0	0	0	0	0	0	0	0	0	0	0	0	0	0	0	0	0	0	0	0	0
arachidonate biosynthesis IV (8-detaturase, lower eukaryotes)	Group 1	0	0	0	0	0	0	0	0	0	0	0	0	0	0	0	0	0	0	0	0	0	0	0	0	0	0	0	0	0	0	0	0	0	0	0	0	0	0	0	0	0	0	0	0	0	0	0	0
icosapentaenoate biosynthesis V (8-desaturase, lower eukaryotes)	Group 1	0	0	0	0	0	0	0	0	0	0	0	0	0	0	0	0	0	0	0	0	0	0	0	0	0	0	0	0	0	0	0	0	0	0	0	0	0	0	0	0	0	0	0	0	0	0	0	0
stephacidin A biosynthesis	Group 1	0	0	0	0	0	0	0	0	0	0	0	0	0	0	0	0	0	0	0	0	0	0	0	0	0	0	0	0	0	0	0	0	0	0	0	0	0	0	0	0	0	0	0	0	0	0	0	0
notoamide C and D biosynthesis	Group 1	0	0	0	0	0	0	0	0	0	0	0	0	0	0	0	0	0	0	0	0	0	0	0	0	0	0	0	0	0	0	0	0	0	0	0	0	0	0	0	0	0	0	0	0	0	0	0	0
roquefortine C biosynthesis	Group 1	0	0	0	0	0	0	0	0	0	0	0	0	0	0	0	0	0	0	0	0	0	0	0	0	0	0	0	0	0	0	0	0	0	0	0	0	0	0	0	0	0	0	0	0	0	0	0	0
docosahexaenoate biosynthesis III (6-desaturase, mammals)	Group 1	0	0	0	0	0	0	0	0	0	0	0	0	0	0	0	0	0	0	0	0	0	0	0	0	0	0	0	0	0	0	0	0	0	0	0	0	0	0	0	0	0	0	0	0	0	0	0	0
meleagrin biosynthesis	Group 1	0	0	0	0	0	0	0	0	0	0	0	0	0	0	0	0	0	0	0	0	0	0	0	0	0	0	0	0	0	0	0	0	0	0	0	0	0	0	0	0	0	0	0	0	0	0	0	0
neoxaline biosynthesis	Group 1	0	0	0	0	0	0	0	0	0	0	0	0	0	0	0	0	0	0	0	0	0	0	0	0	0	0	0	0	0	0	0	0	0	0	0	0	0	0	0	0	0	0	0	0	0	0	0	0
GDP-6-deoxy-D-altro-heptose biosynthesis	Group 1	0	0	0	0	0	0	0	0	0	0	0	0	0	0	0	0	0	0	0	0	0	0	0	0	0	0	0	0	0	0	0	0	0	0	0	0	0	0	0	0	0	0	0	0	0	0	0	0
chaetoglobosin A biosynthesis	Group 1	0	0	0	0	0	0	0	0	0	0	0	0	0	0	0	0	0	0	0	0	0	0	0	0	0	0	0	0	0	0	0	0	0	0	0	0	0	0	0	0	0	0	0	0	0	0	0	0
GDP-6-deoxy-D-manno-heptose biosynthesis	Group 1	0	0	0	0	0	0	0	0	0	0	0	0	0	0	0	0	0	0	0	0	0	0	0	0	0	0	0	0	0	0	0	0	0	0	0	0	0	0	0	0	0	0	0	0	0	0	0	0
methiin metabolism	Group 1	0	0	0	0	0	0	0	0	0	0	0	0	0	0	0	0	0	0	0	0	0	0	0	0	0	0	0	0	0	0	0	0	0	0	0	0	0	0	0	0	0	0	0	0	0	0	0	0
pterocarpan phytoalexins modification (maackiain, medicarpin, pisatin, phaseollin)	Group 1	0	0	0	0	0	0	0	0	0	0	0	0	0	0	0	0	0	0	0	0	0	0	0	0	0	0	0	0	0	0	0	0	0	0	0	0	0	0	0	0	0	0	0	0	0	0	0	0
ricinoleate biosynthesis	Group 1	0	0	0	0	0	0	0	0	0	0	0	0	0	0	0	0	0	0	0	0	0	0	0	0	0	0	0	0	0	0	0	0	0	0	0	0	0	0	0	0	0	0	0	0	0	0	0	0
juniperonate biosynthesis	Group 1	0	0	0	0	0	0	0	0	0	0	0	0	0	0	0	0	0	0	0	0	0	0	0	0	0	0	0	0	0	0	0	0	0	0	0	0	0	0	0	0	0	0	0	0	0	0	0	0
naphthalene degradation (anaerobic)	Group 1	0	0	0	0	0	0	0	0	0	0	0	0	0	0	0	0	0	0	0	0	0	0	0	0	0	0	0	0	0	0	0	0	0	0	0	0	0	0	0	0	0	0	0	0	0	0	0	0
autoinducer CAI-1 biosynthesis	Group 1	0	0	0	0	0	0	0	0	0	0	0	0	0	0	0	0	0	0	0	0	0	0	0	0	0	0	0	0	0	0	0	0	0	0	0	0	0	0	0	0	0	0	0	0	0	0	0	0
astaxanthin dirhamnoside biosynthesis	Group 1	0	0	0	0	0	0	0	0	0	0	0	0	0	0	0	0	0	0	0	0	0	0	0	0	0	0	0	0	0	0	0	0	0	0	0	0	0	0	0	0	0	0	0	0	0	0	0	0
nystatin biosynthesis	Group 1	0	0	0	0	0	0	0	0	0	0	0	0	0	0	0	0	0	0	0	0	0	0	0	0	0	0	0	0	0	0	0	0	0	0	0	0	0	0	0	0	0	0	0	0	0	0	0	0
phosphatidylinositol biosynthesis II (eukaryotes)	Group 1	0	0	0	0	0	0	0	0	0	0	0	0	0	0	0	0	0	0	0	0	0	0	0	0	0	0	0	0	0	0	0	0	0	0	0	0	0	0	0	0	0	0	0	0	0	0	0	0
bacilysin biosynthesis	Group 1	0	0	0	0	0	0	0	0	0	0	0	0	0	0	0	0	0	0	0	0	0	0	0	0	0	0	0	0	0	0	0	0	0	0	0	0	0	0	0	0	0	0	0	0	0	0	0	0
2,4,6-trinitrophenol and 2,4-dinitrophenol degradation	Group 1	0	0	0	0	0	0	0	0	0	0	0	0	0	0	0	0	0	0	0	0	0	0	0	0	0	0	0	0	0	0	0	0	0	0	0	0	0	0	0	0	0	0	0	0	0	0	0	0
2,4-dinitroanisole degradation	Group 1	0	0	0	0	0	0	0	0	0	0	0	0	0	0	0	0	0	0	0	0	0	0	0	0	0	0	0	0	0	0	0	0	0	0	0	0	0	0	0	0	0	0	0	0	0	0	0	0
yatein biosynthesis II	Group 1	0	0	0	0	0	0	0	0	0	0	0	0	0	0	0	0	0	0	0	0	0	0	0	0	0	0	0	0	0	0	0	0	0	0	0	0	0	0	0	0	0	0	0	0	0	0	0	0
phospholipid desaturation	Group 1	0	0	0	0	0	0	0	0	0	0	0	0	0	0	0	0	0	0	0	0	0	0	0	0	0	0	0	0	0	0	0	0	0	0	0	0	0	0	0	0	0	0	0	0	0	0	0	0
hinokinin biosynthesis	Group 1	0	0	0	0	0	0	0	0	0	0	0	0	0	0	0	0	0	0	0	0	0	0	0	0	0	0	0	0	0	0	0	0	0	0	0	0	0	0	0	0	0	0	0	0	0	0	0	0
arctigenin and isoarctigenin biosynthesis	Group 1	0	0	0	0	0	0	0	0	0	0	0	0	0	0	0	0	0	0	0	0	0	0	0	0	0	0	0	0	0	0	0	0	0	0	0	0	0	0	0	0	0	0	0	0	0	0	0	0
hinokiresinol biosynthesis	Group 1	0	0	0	0	0	0	0	0	0	0	0	0	0	0	0	0	0	0	0	0	0	0	0	0	0	0	0	0	0	0	0	0	0	0	0	0	0	0	0	0	0	0	0	0	0	0	0	0
calycosin 7-O-glucoside biosynthesis	Group 1	0	0	0	0	0	0	0	0	0	0	0	0	0	0	0	0	0	0	0	0	0	0	0	0	0	0	0	0	0	0	0	0	0	0	0	0	0	0	0	0	0	0	0	0	0	0	0	0
vernolate biosynthesis II	Group 1	0	0	0	0	0	0	0	0	0	0	0	0	0	0	0	0	0	0	0	0	0	0	0	0	0	0	0	0	0	0	0	0	0	0	0	0	0	0	0	0	0	0	0	0	0	0	0	0
kievitone detoxification	Group 1	0	0	0	0	0	0	0	0	0	0	0	0	0	0	0	0	0	0	0	0	0	0	0	0	0	0	0	0	0	0	0	0	0	0	0	0	0	0	0	0	0	0	0	0	0	0	0	0
astaxanthin biosynthesis (flowering plants)	Group 1	0	0	0	0	0	0	0	0	0	0	0	0	0	0	0	0	0	0	0	0	0	0	0	0	0	0	0	0	0	0	0	0	0	0	0	0	0	0	0	0	0	0	0	0	0	0	0	0
2,2'-dihydroxyketocarotenoids biosynthesis	Group 1	0	0	0	0	0	0	0	0	0	0	0	0	0	0	0	0	0	0	0	0	0	0	0	0	0	0	0	0	0	0	0	0	0	0	0	0	0	0	0	0	0	0	0	0	0	0	0	0
echinenone and zeaxanthin biosynthesis (Synechocystis)	Group 1	0	0	0	0	0	0	0	0	0	0	0	0	0	0	0	0	0	0	0	0	0	0	0	0	0	0	0	0	0	0	0	0	0	0	0	0	0	0	0	0	0	0	0	0	0	0	0	0
abscisic acid degradation to neophaseic acid	Group 1	0	0	0	0	0	0	0	0	0	0	0	0	0	0	0	0	0	0	0	0	0	0	0	0	0	0	0	0	0	0	0	0	0	0	0	0	0	0	0	0	0	0	0	0	0	0	0	0
abscisic acid degradation to 7'-hydroxyabscisate	Group 1	0	0	0	0	0	0	0	0	0	0	0	0	0	0	0	0	0	0	0	0	0	0	0	0	0	0	0	0	0	0	0	0	0	0	0	0	0	0	0	0	0	0	0	0	0	0	0	0
coniferyl alcohol 9-methyl ester biosynthesis	Group 1	0	0	0	0	0	0	0	0	0	0	0	0	0	0	0	0	0	0	0	0	0	0	0	0	0	0	0	0	0	0	0	0	0	0	0	0	0	0	0	0	0	0	0	0	0	0	0	0
dermatan sulfate degradation I (bacterial)	Group 1	0	0	0	0	0	0	0	0	0	0	0	0	0	0	0	0	0	0	0	0	0	0	0	0	0	0	0	0	0	0	0	0	0	0	0	0	0	0	0	0	0	0	0	0	0	0	0	0
ulvan degradation	Group 1	0	0	0	0	0	0	0	0	0	0	0	0	0	0	0	0	0	0	0	0	0	0	0	0	0	0	0	0	0	0	0	0	0	0	0	0	0	0	0	0	0	0	0	0	0	0	0	0
3-hydroxy-4-methyl-proline biosynthesis	Group 1	0	0	0	0	0	0	0	0	0	0	0	0	0	0	0	0	0	0	0	0	0	0	0	0	0	0	0	0	0	0	0	0	0	0	0	0	0	0	0	0	0	0	0	0	0	0	0	0
3-hydroxy-L-homotyrosine biosynthesis	Group 1	0	0	0	0	0	0	0	0	0	0	0	0	0	0	0	0	0	0	0	0	0	0	0	0	0	0	0	0	0	0	0	0	0	0	0	0	0	0	0	0	0	0	0	0	0	0	0	0
echinocandin B biosynthesis	Group 1	0	0	0	0	0	0	0	0	0	0	0	0	0	0	0	0	0	0	0	0	0	0	0	0	0	0	0	0	0	0	0	0	0	0	0	0	0	0	0	0	0	0	0	0	0	0	0	0
echinocandin B degradation	Group 1	0	0	0	0	0	0	0	0	0	0	0	0	0	0	0	0	0	0	0	0	0	0	0	0	0	0	0	0	0	0	0	0	0	0	0	0	0	0	0	0	0	0	0	0	0	0	0	0
griseofulvin biosynthesis	Group 1	0	0	0	0	0	0	0	0	0	0	0	0	0	0	0	0	0	0	0	0	0	0	0	0	0	0	0	0	0	0	0	0	0	0	0	0	0	0	0	0	0	0	0	0	0	0	0	0
(8E,10E)-dodeca-8,10-dienol biosynthesis	Group 1	0	0	0	0	0	0	0	0	0	0	0	0	0	0	0	0	0	0	0	0	0	0	0	0	0	0	0	0	0	0	0	0	0	0	0	0	0	0	0	0	0	0	0	0	0	0	0	0
dechlorogriseofulvin biosynthesis	Group 1	0	0	0	0	0	0	0	0	0	0	0	0	0	0	0	0	0	0	0	0	0	0	0	0	0	0	0	0	0	0	0	0	0	0	0	0	0	0	0	0	0	0	0	0	0	0	0	0
Spodoptera littoralis pheromone biosynthesis	Group 1	0	0	0	0	0	0	0	0	0	0	0	0	0	0	0	0	0	0	0	0	0	0	0	0	0	0	0	0	0	0	0	0	0	0	0	0	0	0	0	0	0	0	0	0	0	0	0	0
dTDP-beta-L-digitoxose biosynthesis	Group 1	0	0	0	0	0	0	0	0	0	0	0	0	0	0	0	0	0	0	0	0	0	0	0	0	0	0	0	0	0	0	0	0	0	0	0	0	0	0	0	0	0	0	0	0	0	0	0	0
protein N-glycosylation (Methanococcus voltae)	Group 1	0	0	0	0	0	0	0	0	0	0	0	0	0	0	0	0	0	0	0	0	0	0	0	0	0	0	0	0	0	0	0	0	0	0	0	0	0	0	0	0	0	0	0	0	0	0	0	0
viridicatumtoxin biosynthesis	Group 1	0	0	0	0	0	0	0	0	0	0	0	0	0	0	0	0	0	0	0	0	0	0	0	0	0	0	0	0	0	0	0	0	0	0	0	0	0	0	0	0	0	0	0	0	0	0	0	0
tryptoquialanine biosynthesis	Group 1	0	0	0	0	0	0	0	0	0	0	0	0	0	0	0	0	0	0	0	0	0	0	0	0	0	0	0	0	0	0	0	0	0	0	0	0	0	0	0	0	0	0	0	0	0	0	0	0
protein N-glycosylation (Haloferax volcanii)	Group 1	0	0	0	0	0	0	0	0	0	0	0	0	0	0	0	0	0	0	0	0	0	0	0	0	0	0	0	0	0	0	0	0	0	0	0	0	0	0	0	0	0	0	0	0	0	0	0	0
glycogen degradation III (via anhydrofructose)	Group 1	0	0	0	0	0	0	0	0	0	0	0	0	0	0	0	0	0	0	0	0	0	0	0	0	0	0	0	0	0	0	0	0	0	0	0	0	0	0	0	0	0	0	0	0	0	0	0	0
aureobasidin A biosynthesis	Group 1	0	0	0	0	0	0	0	0	0	0	0	0	0	0	0	0	0	0	0	0	0	0	0	0	0	0	0	0	0	0	0	0	0	0	0	0	0	0	0	0	0	0	0	0	0	0	0	0
galactolipid biosynthesis II	Group 1	0	0	0	0	0	0	0	0	0	0	0	0	0	0	0	0	0	0	0	0	0	0	0	0	0	0	0	0	0	0	0	0	0	0	0	0	0	0	0	0	0	0	0	0	0	0	0	0
apicidin biosynthesis	Group 1	0	0	0	0	0	0	0	0	0	0	0	0	0	0	0	0	0	0	0	0	0	0	0	0	0	0	0	0	0	0	0	0	0	0	0	0	0	0	0	0	0	0	0	0	0	0	0	0
apicidin F biosynthesis	Group 1	0	0	0	0	0	0	0	0	0	0	0	0	0	0	0	0	0	0	0	0	0	0	0	0	0	0	0	0	0	0	0	0	0	0	0	0	0	0	0	0	0	0	0	0	0	0	0	0
equisetin biosynthesis	Group 1	0	0	0	0	0	0	0	0	0	0	0	0	0	0	0	0	0	0	0	0	0	0	0	0	0	0	0	0	0	0	0	0	0	0	0	0	0	0	0	0	0	0	0	0	0	0	0	0
fusaridione A biosynthesis	Group 1	0	0	0	0	0	0	0	0	0	0	0	0	0	0	0	0	0	0	0	0	0	0	0	0	0	0	0	0	0	0	0	0	0	0	0	0	0	0	0	0	0	0	0	0	0	0	0	0
saframycin A biosynthesis	Group 1	0	0	0	0	0	0	0	0	0	0	0	0	0	0	0	0	0	0	0	0	0	0	0	0	0	0	0	0	0	0	0	0	0	0	0	0	0	0	0	0	0	0	0	0	0	0	0	0
fusaric acid biosynthesis	Group 1	0	0	0	0	0	0	0	0	0	0	0	0	0	0	0	0	0	0	0	0	0	0	0	0	0	0	0	0	0	0	0	0	0	0	0	0	0	0	0	0	0	0	0	0	0	0	0	0
fusarin C biosynthesis	Group 1	0	0	0	0	0	0	0	0	0	0	0	0	0	0	0	0	0	0	0	0	0	0	0	0	0	0	0	0	0	0	0	0	0	0	0	0	0	0	0	0	0	0	0	0	0	0	0	0
CMP-8-amino-3,8-dideoxy-D-manno-octulosonate biosynthesis	Group 1	0	0	0	0	0	0	0	0	0	0	0	0	0	0	0	0	0	0	0	0	0	0	0	0	0	0	0	0	0	0	0	0	0	0	0	0	0	0	0	0	0	0	0	0	0	0	0	0
Kdo8N transfer to lipid IVA	Group 1	0	0	0	0	0	0	0	0	0	0	0	0	0	0	0	0	0	0	0	0	0	0	0	0	0	0	0	0	0	0	0	0	0	0	0	0	0	0	0	0	0	0	0	0	0	0	0	0
rosamicin biosynthesis	Group 1	0	0	0	0	0	0	0	0	0	0	0	0	0	0	0	0	0	0	0	0	0	0	0	0	0	0	0	0	0	0	0	0	0	0	0	0	0	0	0	0	0	0	0	0	0	0	0	0
anthocyanidin sambubioside biosynthesis	Group 1	0	0	0	0	0	0	0	0	0	0	0	0	0	0	0	0	0	0	0	0	0	0	0	0	0	0	0	0	0	0	0	0	0	0	0	0	0	0	0	0	0	0	0	0	0	0	0	0
anthocyanidin acylglucoside and acylsambubioside biosynthesis	Group 1	0	0	0	0	0	0	0	0	0	0	0	0	0	0	0	0	0	0	0	0	0	0	0	0	0	0	0	0	0	0	0	0	0	0	0	0	0	0	0	0	0	0	0	0	0	0	0	0
carnosate bioynthesis	Group 1	0	0	0	0	0	0	0	0	0	0	0	0	0	0	0	0	0	0	0	0	0	0	0	0	0	0	0	0	0	0	0	0	0	0	0	0	0	0	0	0	0	0	0	0	0	0	0	0
arabidopyrone biosynthesis	Group 1	0	0	0	0	0	0	0	0	0	0	0	0	0	0	0	0	0	0	0	0	0	0	0	0	0	0	0	0	0	0	0	0	0	0	0	0	0	0	0	0	0	0	0	0	0	0	0	0
nitrite reduction (hemoglobin)	Group 1	0	0	0	0	0	0	0	0	0	0	0	0	0	0	0	0	0	0	0	0	0	0	0	0	0	0	0	0	0	0	0	0	0	0	0	0	0	0	0	0	0	0	0	0	0	0	0	0
stipitatate biosynthesis	Group 1	0	0	0	0	0	0	0	0	0	0	0	0	0	0	0	0	0	0	0	0	0	0	0	0	0	0	0	0	0	0	0	0	0	0	0	0	0	0	0	0	0	0	0	0	0	0	0	0
dTDP-&alpha;-D-ravidosamine and dTDP-4-acetyl-&alpha;-D-ravidosamine biosynthesis	Group 1	0	0	0	0	0	0	0	0	0	0	0	0	0	0	0	0	0	0	0	0	0	0	0	0	0	0	0	0	0	0	0	0	0	0	0	0	0	0	0	0	0	0	0	0	0	0	0	0
8-O-methylfusarubin biosynthesis	Group 1	0	0	0	0	0	0	0	0	0	0	0	0	0	0	0	0	0	0	0	0	0	0	0	0	0	0	0	0	0	0	0	0	0	0	0	0	0	0	0	0	0	0	0	0	0	0	0	0
holomycin biosynthesis	Group 1	0	0	0	0	0	0	0	0	0	0	0	0	0	0	0	0	0	0	0	0	0	0	0	0	0	0	0	0	0	0	0	0	0	0	0	0	0	0	0	0	0	0	0	0	0	0	0	0
bikaverin biosynthesis	Group 1	0	0	0	0	0	0	0	0	0	0	0	0	0	0	0	0	0	0	0	0	0	0	0	0	0	0	0	0	0	0	0	0	0	0	0	0	0	0	0	0	0	0	0	0	0	0	0	0
guadinomine B biosynthesis	Group 1	0	0	0	0	0	0	0	0	0	0	0	0	0	0	0	0	0	0	0	0	0	0	0	0	0	0	0	0	0	0	0	0	0	0	0	0	0	0	0	0	0	0	0	0	0	0	0	0
zwittermicin A biosynthesis	Group 1	0	0	0	0	0	0	0	0	0	0	0	0	0	0	0	0	0	0	0	0	0	0	0	0	0	0	0	0	0	0	0	0	0	0	0	0	0	0	0	0	0	0	0	0	0	0	0	0
aurofusarin biosynthesis	Group 1	0	0	0	0	0	0	0	0	0	0	0	0	0	0	0	0	0	0	0	0	0	0	0	0	0	0	0	0	0	0	0	0	0	0	0	0	0	0	0	0	0	0	0	0	0	0	0	0
citreoisocoumarin and bikisocoumarin biosynthesis	Group 1	0	0	0	0	0	0	0	0	0	0	0	0	0	0	0	0	0	0	0	0	0	0	0	0	0	0	0	0	0	0	0	0	0	0	0	0	0	0	0	0	0	0	0	0	0	0	0	0
geranyl beta-primeveroside biosynthesis	Group 1	0	0	0	0	0	0	0	0	0	0	0	0	0	0	0	0	0	0	0	0	0	0	0	0	0	0	0	0	0	0	0	0	0	0	0	0	0	0	0	0	0	0	0	0	0	0	0	0
4-hydroxy-4-methyl-L-glutamate biosynthesis	Group 1	0	0	0	0	0	0	0	0	0	0	0	0	0	0	0	0	0	0	0	0	0	0	0	0	0	0	0	0	0	0	0	0	0	0	0	0	0	0	0	0	0	0	0	0	0	0	0	0
sch210971 and sch210972 biosynthesis	Group 1	0	0	0	0	0	0	0	0	0	0	0	0	0	0	0	0	0	0	0	0	0	0	0	0	0	0	0	0	0	0	0	0	0	0	0	0	0	0	0	0	0	0	0	0	0	0	0	0
2,4-xylenol degradation to protocatechuate	Group 1	0	0	0	0	0	0	0	0	0	0	0	0	0	0	0	0	0	0	0	0	0	0	0	0	0	0	0	0	0	0	0	0	0	0	0	0	0	0	0	0	0	0	0	0	0	0	0	0
viridicatin biosynthesis	Group 1	0	0	0	0	0	0	0	0	0	0	0	0	0	0	0	0	0	0	0	0	0	0	0	0	0	0	0	0	0	0	0	0	0	0	0	0	0	0	0	0	0	0	0	0	0	0	0	0
4'-methoxyviridicatin biosynthesis	Group 1	0	0	0	0	0	0	0	0	0	0	0	0	0	0	0	0	0	0	0	0	0	0	0	0	0	0	0	0	0	0	0	0	0	0	0	0	0	0	0	0	0	0	0	0	0	0	0	0
dapdiamides biosynthesis	Group 1	0	0	0	0	0	0	0	0	0	0	0	0	0	0	0	0	0	0	0	0	0	0	0	0	0	0	0	0	0	0	0	0	0	0	0	0	0	0	0	0	0	0	0	0	0	0	0	0
lyngbyatoxin biosynthesis	Group 1	0	0	0	0	0	0	0	0	0	0	0	0	0	0	0	0	0	0	0	0	0	0	0	0	0	0	0	0	0	0	0	0	0	0	0	0	0	0	0	0	0	0	0	0	0	0	0	0
(3R)-linalool biosynthesis	Group 1	0	0	0	0	0	0	0	0	0	0	0	0	0	0	0	0	0	0	0	0	0	0	0	0	0	0	0	0	0	0	0	0	0	0	0	0	0	0	0	0	0	0	0	0	0	0	0	0
FeMo cofactor biosynthesis	Group 1	0	0	0	0	0	0	0	0	0	0	0	0	0	0	0	0	0	0	0	0	0	0	0	0	0	0	0	0	0	0	0	0	0	0	0	0	0	0	0	0	0	0	0	0	0	0	0	0
calonectrin biosynthesis	Group 1	0	0	0	0	0	0	0	0	0	0	0	0	0	0	0	0	0	0	0	0	0	0	0	0	0	0	0	0	0	0	0	0	0	0	0	0	0	0	0	0	0	0	0	0	0	0	0	0
deoxynivalenol biosynthesis	Group 1	0	0	0	0	0	0	0	0	0	0	0	0	0	0	0	0	0	0	0	0	0	0	0	0	0	0	0	0	0	0	0	0	0	0	0	0	0	0	0	0	0	0	0	0	0	0	0	0
nivalenol biosynthesis	Group 1	0	0	0	0	0	0	0	0	0	0	0	0	0	0	0	0	0	0	0	0	0	0	0	0	0	0	0	0	0	0	0	0	0	0	0	0	0	0	0	0	0	0	0	0	0	0	0	0
harzianum A and trichodermin biosynthesis	Group 1	0	0	0	0	0	0	0	0	0	0	0	0	0	0	0	0	0	0	0	0	0	0	0	0	0	0	0	0	0	0	0	0	0	0	0	0	0	0	0	0	0	0	0	0	0	0	0	0
3-hydroxy-4-methyl-anthranilate biosynthesis I	Group 1	0	0	0	0	0	0	0	0	0	0	0	0	0	0	0	0	0	0	0	0	0	0	0	0	0	0	0	0	0	0	0	0	0	0	0	0	0	0	0	0	0	0	0	0	0	0	0	0
actinomycin D biosynthesis	Group 1	0	0	0	0	0	0	0	0	0	0	0	0	0	0	0	0	0	0	0	0	0	0	0	0	0	0	0	0	0	0	0	0	0	0	0	0	0	0	0	0	0	0	0	0	0	0	0	0
CMP-diacetamido-8-epilegionaminic acid biosynthesis	Group 1	0	0	0	0	0	0	0	0	0	0	0	0	0	0	0	0	0	0	0	0	0	0	0	0	0	0	0	0	0	0	0	0	0	0	0	0	0	0	0	0	0	0	0	0	0	0	0	0
ophiobolin F biosynthesis	Group 1	0	0	0	0	0	0	0	0	0	0	0	0	0	0	0	0	0	0	0	0	0	0	0	0	0	0	0	0	0	0	0	0	0	0	0	0	0	0	0	0	0	0	0	0	0	0	0	0
methyl phomopsenoate biosynthesis	Group 1	0	0	0	0	0	0	0	0	0	0	0	0	0	0	0	0	0	0	0	0	0	0	0	0	0	0	0	0	0	0	0	0	0	0	0	0	0	0	0	0	0	0	0	0	0	0	0	0
bacterial bioluminescence	Group 1	0	0	0	0	0	0	0	0	0	0	0	0	0	0	0	0	0	0	0	0	0	0	0	0	0	0	0	0	0	0	0	0	0	0	0	0	0	0	0	0	0	0	0	0	0	0	0	0
icosapentaenoate biosynthesis III (8-desaturase, mammals)	Group 1	0	0	0	0	0	0	0	0	0	0	0	0	0	0	0	0	0	0	0	0	0	0	0	0	0	0	0	0	0	0	0	0	0	0	0	0	0	0	0	0	0	0	0	0	0	0	0	0
arachidonate biosynthesis V (8-detaturase, mammals)	Group 1	0	0	0	0	0	0	0	0	0	0	0	0	0	0	0	0	0	0	0	0	0	0	0	0	0	0	0	0	0	0	0	0	0	0	0	0	0	0	0	0	0	0	0	0	0	0	0	0
(4Z,7Z,10Z,13Z,16Z)-docosapentaenoate biosynthesis (6-desaturase)	Group 1	0	0	0	0	0	0	0	0	0	0	0	0	0	0	0	0	0	0	0	0	0	0	0	0	0	0	0	0	0	0	0	0	0	0	0	0	0	0	0	0	0	0	0	0	0	0	0	0
docosahexaenoate biosynthesis IV (4-desaturase, mammals)	Group 1	0	0	0	0	0	0	0	0	0	0	0	0	0	0	0	0	0	0	0	0	0	0	0	0	0	0	0	0	0	0	0	0	0	0	0	0	0	0	0	0	0	0	0	0	0	0	0	0
(4Z,7Z,10Z,13Z,16Z)-docosa-4,7,10,13,16-pentaenoate biosynthesis II (4-desaturase)	Group 1	0	0	0	0	0	0	0	0	0	0	0	0	0	0	0	0	0	0	0	0	0	0	0	0	0	0	0	0	0	0	0	0	0	0	0	0	0	0	0	0	0	0	0	0	0	0	0	0
5,6-dimethylbenzimidazole biosynthesis II (anaerobic)	Group 1	0	0	0	0	0	0	0	0	0	0	0	0	0	0	0	0	0	0	0	0	0	0	0	0	0	0	0	0	0	0	0	0	0	0	0	0	0	0	0	0	0	0	0	0	0	0	0	0
T-2 toxin biosynthesis	Group 1	0	0	0	0	0	0	0	0	0	0	0	0	0	0	0	0	0	0	0	0	0	0	0	0	0	0	0	0	0	0	0	0	0	0	0	0	0	0	0	0	0	0	0	0	0	0	0	0
3-hydroxyquinaldate biosynthesis	Group 1	0	0	0	0	0	0	0	0	0	0	0	0	0	0	0	0	0	0	0	0	0	0	0	0	0	0	0	0	0	0	0	0	0	0	0	0	0	0	0	0	0	0	0	0	0	0	0	0
quinoxaline-2-carboxylate biosynthesis	Group 1	0	0	0	0	0	0	0	0	0	0	0	0	0	0	0	0	0	0	0	0	0	0	0	0	0	0	0	0	0	0	0	0	0	0	0	0	0	0	0	0	0	0	0	0	0	0	0	0
echinomycin and triostin A biosynthesis	Group 1	0	0	0	0	0	0	0	0	0	0	0	0	0	0	0	0	0	0	0	0	0	0	0	0	0	0	0	0	0	0	0	0	0	0	0	0	0	0	0	0	0	0	0	0	0	0	0	0
stellatic acid biosynthesis	Group 1	0	0	0	0	0	0	0	0	0	0	0	0	0	0	0	0	0	0	0	0	0	0	0	0	0	0	0	0	0	0	0	0	0	0	0	0	0	0	0	0	0	0	0	0	0	0	0	0
thiocoraline biosynthesis	Group 1	0	0	0	0	0	0	0	0	0	0	0	0	0	0	0	0	0	0	0	0	0	0	0	0	0	0	0	0	0	0	0	0	0	0	0	0	0	0	0	0	0	0	0	0	0	0	0	0
polyacyltrehalose biosynthesis	Group 1	0	0	0	0	0	0	0	0	0	0	0	0	0	0	0	0	0	0	0	0	0	0	0	0	0	0	0	0	0	0	0	0	0	0	0	0	0	0	0	0	0	0	0	0	0	0	0	0
aucuparin biosynthesis	Group 1	0	0	0	0	0	0	0	0	0	0	0	0	0	0	0	0	0	0	0	0	0	0	0	0	0	0	0	0	0	0	0	0	0	0	0	0	0	0	0	0	0	0	0	0	0	0	0	0
beta-D-mannosyl phosphomycoketide biosynthesis	Group 1	0	0	0	0	0	0	0	0	0	0	0	0	0	0	0	0	0	0	0	0	0	0	0	0	0	0	0	0	0	0	0	0	0	0	0	0	0	0	0	0	0	0	0	0	0	0	0	0
phthiocerol biosynthesis	Group 1	0	0	0	0	0	0	0	0	0	0	0	0	0	0	0	0	0	0	0	0	0	0	0	0	0	0	0	0	0	0	0	0	0	0	0	0	0	0	0	0	0	0	0	0	0	0	0	0
phenolphthiocerol biosynthesis	Group 1	0	0	0	0	0	0	0	0	0	0	0	0	0	0	0	0	0	0	0	0	0	0	0	0	0	0	0	0	0	0	0	0	0	0	0	0	0	0	0	0	0	0	0	0	0	0	0	0
dimycocerosyl triglycosyl phenolphthiocerol biosynthesis	Group 1	0	0	0	0	0	0	0	0	0	0	0	0	0	0	0	0	0	0	0	0	0	0	0	0	0	0	0	0	0	0	0	0	0	0	0	0	0	0	0	0	0	0	0	0	0	0	0	0
dimycocerosyl phthiocerol biosynthesis	Group 1	0	0	0	0	0	0	0	0	0	0	0	0	0	0	0	0	0	0	0	0	0	0	0	0	0	0	0	0	0	0	0	0	0	0	0	0	0	0	0	0	0	0	0	0	0	0	0	0
p-HBAD biosynthesis	Group 1	0	0	0	0	0	0	0	0	0	0	0	0	0	0	0	0	0	0	0	0	0	0	0	0	0	0	0	0	0	0	0	0	0	0	0	0	0	0	0	0	0	0	0	0	0	0	0	0
mycobacterial sulfolipid biosynthesis	Group 1	0	0	0	0	0	0	0	0	0	0	0	0	0	0	0	0	0	0	0	0	0	0	0	0	0	0	0	0	0	0	0	0	0	0	0	0	0	0	0	0	0	0	0	0	0	0	0	0
diphenyl ethers degradation	Group 1	0	0	0	0	0	0	0	0	0	0	0	0	0	0	0	0	0	0	0	0	0	0	0	0	0	0	0	0	0	0	0	0	0	0	0	0	0	0	0	0	0	0	0	0	0	0	0	0
yatein biosynthesis I	Group 1	0	0	0	0	0	0	0	0	0	0	0	0	0	0	0	0	0	0	0	0	0	0	0	0	0	0	0	0	0	0	0	0	0	0	0	0	0	0	0	0	0	0	0	0	0	0	0	0
(-)-4'-demethyl-epipodophyllotoxin biosynthesis	Group 1	0	0	0	0	0	0	0	0	0	0	0	0	0	0	0	0	0	0	0	0	0	0	0	0	0	0	0	0	0	0	0	0	0	0	0	0	0	0	0	0	0	0	0	0	0	0	0	0
carbon monoxide oxidation to CO2	Group 1	0	0	0	0	0	0	0	0	0	0	0	0	0	0	0	0	0	0	0	0	0	0	0	0	0	0	0	0	0	0	0	0	0	0	0	0	0	0	0	0	0	0	0	0	0	0	0	0
shinorine biosynthesis	Group 1	0	0	0	0	0	0	0	0	0	0	0	0	0	0	0	0	0	0	0	0	0	0	0	0	0	0	0	0	0	0	0	0	0	0	0	0	0	0	0	0	0	0	0	0	0	0	0	0
gadusol biosynthesis	Group 1	0	0	0	0	0	0	0	0	0	0	0	0	0	0	0	0	0	0	0	0	0	0	0	0	0	0	0	0	0	0	0	0	0	0	0	0	0	0	0	0	0	0	0	0	0	0	0	0
bile acid 7&alpha;-dehydroxylation	Group 1	0	0	0	0	0	0	0	0	0	0	0	0	0	0	0	0	0	0	0	0	0	0	0	0	0	0	0	0	0	0	0	0	0	0	0	0	0	0	0	0	0	0	0	0	0	0	0	0
iso-bile acids biosynthesis I	Group 1	0	0	0	0	0	0	0	0	0	0	0	0	0	0	0	0	0	0	0	0	0	0	0	0	0	0	0	0	0	0	0	0	0	0	0	0	0	0	0	0	0	0	0	0	0	0	0	0
iso-bile acids biosynthesis II	Group 1	0	0	0	0	0	0	0	0	0	0	0	0	0	0	0	0	0	0	0	0	0	0	0	0	0	0	0	0	0	0	0	0	0	0	0	0	0	0	0	0	0	0	0	0	0	0	0	0
bisphenol A degradation	Group 1	0	0	0	0	0	0	0	0	0	0	0	0	0	0	0	0	0	0	0	0	0	0	0	0	0	0	0	0	0	0	0	0	0	0	0	0	0	0	0	0	0	0	0	0	0	0	0	0
bacteriochlorophyll d biosynthesis	Group 1	0	0	0	0	0	0	0	0	0	0	0	0	0	0	0	0	0	0	0	0	0	0	0	0	0	0	0	0	0	0	0	0	0	0	0	0	0	0	0	0	0	0	0	0	0	0	0	0
bacteriochlorophyll c biosynthesis	Group 1	0	0	0	0	0	0	0	0	0	0	0	0	0	0	0	0	0	0	0	0	0	0	0	0	0	0	0	0	0	0	0	0	0	0	0	0	0	0	0	0	0	0	0	0	0	0	0	0
bacteriochlorophyll e biosynthesis	Group 1	0	0	0	0	0	0	0	0	0	0	0	0	0	0	0	0	0	0	0	0	0	0	0	0	0	0	0	0	0	0	0	0	0	0	0	0	0	0	0	0	0	0	0	0	0	0	0	0
bacteriochlorophyll b biosynthesis	Group 1	0	0	0	0	0	0	0	0	0	0	0	0	0	0	0	0	0	0	0	0	0	0	0	0	0	0	0	0	0	0	0	0	0	0	0	0	0	0	0	0	0	0	0	0	0	0	0	0
chlorophyll a biosynthesis III	Group 1	0	0	0	0	0	0	0	0	0	0	0	0	0	0	0	0	0	0	0	0	0	0	0	0	0	0	0	0	0	0	0	0	0	0	0	0	0	0	0	0	0	0	0	0	0	0	0	0
3-hydroxy-4-methyl-anthranilate biosynthesis II	Group 1	0	0	0	0	0	0	0	0	0	0	0	0	0	0	0	0	0	0	0	0	0	0	0	0	0	0	0	0	0	0	0	0	0	0	0	0	0	0	0	0	0	0	0	0	0	0	0	0
L-leucine degradation IV (reductive Stickland reaction)	Group 1	0	0	0	0	0	0	0	0	0	0	0	0	0	0	0	0	0	0	0	0	0	0	0	0	0	0	0	0	0	0	0	0	0	0	0	0	0	0	0	0	0	0	0	0	0	0	0	0
phosalacine biosynthesis	Group 1	0	0	0	0	0	0	0	0	0	0	0	0	0	0	0	0	0	0	0	0	0	0	0	0	0	0	0	0	0	0	0	0	0	0	0	0	0	0	0	0	0	0	0	0	0	0	0	0
indolmycin biosynthesis	Group 1	0	0	0	0	0	0	0	0	0	0	0	0	0	0	0	0	0	0	0	0	0	0	0	0	0	0	0	0	0	0	0	0	0	0	0	0	0	0	0	0	0	0	0	0	0	0	0	0
butachlor degradation	Group 1	0	0	0	0	0	0	0	0	0	0	0	0	0	0	0	0	0	0	0	0	0	0	0	0	0	0	0	0	0	0	0	0	0	0	0	0	0	0	0	0	0	0	0	0	0	0	0	0
propane degradation I	Group 1	0	0	0	0	0	0	0	0	0	0	0	0	0	0	0	0	0	0	0	0	0	0	0	0	0	0	0	0	0	0	0	0	0	0	0	0	0	0	0	0	0	0	0	0	0	0	0	0
propane degradation II	Group 1	0	0	0	0	0	0	0	0	0	0	0	0	0	0	0	0	0	0	0	0	0	0	0	0	0	0	0	0	0	0	0	0	0	0	0	0	0	0	0	0	0	0	0	0	0	0	0	0
ethene and chloroethene degradation	Group 1	0	0	0	0	0	0	0	0	0	0	0	0	0	0	0	0	0	0	0	0	0	0	0	0	0	0	0	0	0	0	0	0	0	0	0	0	0	0	0	0	0	0	0	0	0	0	0	0
isoprene degradation	Group 1	0	0	0	0	0	0	0	0	0	0	0	0	0	0	0	0	0	0	0	0	0	0	0	0	0	0	0	0	0	0	0	0	0	0	0	0	0	0	0	0	0	0	0	0	0	0	0	0
2-methylpropene degradation	Group 1	0	0	0	0	0	0	0	0	0	0	0	0	0	0	0	0	0	0	0	0	0	0	0	0	0	0	0	0	0	0	0	0	0	0	0	0	0	0	0	0	0	0	0	0	0	0	0	0
methyl tert-butyl ether degradation	Group 1	0	0	0	0	0	0	0	0	0	0	0	0	0	0	0	0	0	0	0	0	0	0	0	0	0	0	0	0	0	0	0	0	0	0	0	0	0	0	0	0	0	0	0	0	0	0	0	0
butane degradation	Group 1	0	0	0	0	0	0	0	0	0	0	0	0	0	0	0	0	0	0	0	0	0	0	0	0	0	0	0	0	0	0	0	0	0	0	0	0	0	0	0	0	0	0	0	0	0	0	0	0
&omega;-sulfo-II-dihydromenaquinone-9 biosynthesis	Group 1	0	0	0	0	0	0	0	0	0	0	0	0	0	0	0	0	0	0	0	0	0	0	0	0	0	0	0	0	0	0	0	0	0	0	0	0	0	0	0	0	0	0	0	0	0	0	0	0
plasmalogen biosynthesis	Group 1	0	0	0	0	0	0	0	0	0	0	0	0	0	0	0	0	0	0	0	0	0	0	0	0	0	0	0	0	0	0	0	0	0	0	0	0	0	0	0	0	0	0	0	0	0	0	0	0
plasmalogen degradation	Group 1	0	0	0	0	0	0	0	0	0	0	0	0	0	0	0	0	0	0	0	0	0	0	0	0	0	0	0	0	0	0	0	0	0	0	0	0	0	0	0	0	0	0	0	0	0	0	0	0
reductive acetyl coenzyme A pathway II (autotrophic methanogens)	Group 1	0	0	0	0	0	0	0	0	0	0	0	0	0	0	0	0	0	0	0	0	0	0	0	0	0	0	0	0	0	0	0	0	0	0	0	0	0	0	0	0	0	0	0	0	0	0	0	0
D-threitol degradation	Group 1	0	0	0	0	0	0	0	0	0	0	0	0	0	0	0	0	0	0	0	0	0	0	0	0	0	0	0	0	0	0	0	0	0	0	0	0	0	0	0	0	0	0	0	0	0	0	0	0
L-threitol degradation	Group 1	0	0	0	0	0	0	0	0	0	0	0	0	0	0	0	0	0	0	0	0	0	0	0	0	0	0	0	0	0	0	0	0	0	0	0	0	0	0	0	0	0	0	0	0	0	0	0	0
erythritol degradation II	Group 1	0	0	0	0	0	0	0	0	0	0	0	0	0	0	0	0	0	0	0	0	0	0	0	0	0	0	0	0	0	0	0	0	0	0	0	0	0	0	0	0	0	0	0	0	0	0	0	0
erythritol degradation I	Group 1	0	0	0	0	0	0	0	0	0	0	0	0	0	0	0	0	0	0	0	0	0	0	0	0	0	0	0	0	0	0	0	0	0	0	0	0	0	0	0	0	0	0	0	0	0	0	0	0
UMP biosynthesis II	Group 1	0	0	0	0	0	0	0	0	0	0	0	0	0	0	0	0	0	0	0	0	0	0	0	0	0	0	0	0	0	0	0	0	0	0	0	0	0	0	0	0	0	0	0	0	0	0	0	0
dimethyl sulfide biosynthesis from methionine	Group 1	0	0	0	0	0	0	0	0	0	0	0	0	0	0	0	0	0	0	0	0	0	0	0	0	0	0	0	0	0	0	0	0	0	0	0	0	0	0	0	0	0	0	0	0	0	0	0	0
polyethylene terephthalate degradation	Group 1	0	0	0	0	0	0	0	0	0	0	0	0	0	0	0	0	0	0	0	0	0	0	0	0	0	0	0	0	0	0	0	0	0	0	0	0	0	0	0	0	0	0	0	0	0	0	0	0
nocardicin A biosynthesis	Group 1	0	0	0	0	0	0	0	0	0	0	0	0	0	0	0	0	0	0	0	0	0	0	0	0	0	0	0	0	0	0	0	0	0	0	0	0	0	0	0	0	0	0	0	0	0	0	0	0
protein S-nitrosylation and denitrosylation	Group 1	0	0	0	0	0	0	0	0	0	0	0	0	0	0	0	0	0	0	0	0	0	0	0	0	0	0	0	0	0	0	0	0	0	0	0	0	0	0	0	0	0	0	0	0	0	0	0	0
Arg/N-end rule pathway (eukaryotic)	Group 1	0	0	0	0	0	0	0	0	0	0	0	0	0	0	0	0	0	0	0	0	0	0	0	0	0	0	0	0	0	0	0	0	0	0	0	0	0	0	0	0	0	0	0	0	0	0	0	0
Ac/N-end rule pathway	Group 1	0	0	0	0	0	0	0	0	0	0	0	0	0	0	0	0	0	0	0	0	0	0	0	0	0	0	0	0	0	0	0	0	0	0	0	0	0	0	0	0	0	0	0	0	0	0	0	0
tRNA splicing II	Group 1	0	0	0	0	0	0	0	0	0	0	0	0	0	0	0	0	0	0	0	0	0	0	0	0	0	0	0	0	0	0	0	0	0	0	0	0	0	0	0	0	0	0	0	0	0	0	0	0
6-methylpretetramide biosynthesis	Group 1	0	0	0	0	0	0	0	0	0	0	0	0	0	0	0	0	0	0	0	0	0	0	0	0	0	0	0	0	0	0	0	0	0	0	0	0	0	0	0	0	0	0	0	0	0	0	0	0
tetracycline and oxytetracycline biosynthesis	Group 1	0	0	0	0	0	0	0	0	0	0	0	0	0	0	0	0	0	0	0	0	0	0	0	0	0	0	0	0	0	0	0	0	0	0	0	0	0	0	0	0	0	0	0	0	0	0	0	0
dTDP-L-daunosamine biosynthesis	Group 1	0	0	0	0	0	0	0	0	0	0	0	0	0	0	0	0	0	0	0	0	0	0	0	0	0	0	0	0	0	0	0	0	0	0	0	0	0	0	0	0	0	0	0	0	0	0	0	0
poly(ribitol phosphate) wall teichoic acid biosynthesis II (S. aureus)	Group 1	0	0	0	0	0	0	0	0	0	0	0	0	0	0	0	0	0	0	0	0	0	0	0	0	0	0	0	0	0	0	0	0	0	0	0	0	0	0	0	0	0	0	0	0	0	0	0	0
type I lipoteichoic acid biosynthesis (S. aureus)	Group 1	0	0	0	0	0	0	0	0	0	0	0	0	0	0	0	0	0	0	0	0	0	0	0	0	0	0	0	0	0	0	0	0	0	0	0	0	0	0	0	0	0	0	0	0	0	0	0	0
type IV lipoteichoic acid biosynthesis (S. pneumoniae)	Group 1	0	0	0	0	0	0	0	0	0	0	0	0	0	0	0	0	0	0	0	0	0	0	0	0	0	0	0	0	0	0	0	0	0	0	0	0	0	0	0	0	0	0	0	0	0	0	0	0
poly(3-O-beta-D-glucopyranosyl-N-acetylgalactosamine 1-phosphate) wall teichoic acid biosynthesis	Group 1	0	0	0	0	0	0	0	0	0	0	0	0	0	0	0	0	0	0	0	0	0	0	0	0	0	0	0	0	0	0	0	0	0	0	0	0	0	0	0	0	0	0	0	0	0	0	0	0
teichuronic acid biosynthesis (B. subtilis 168)	Group 1	0	0	0	0	0	0	0	0	0	0	0	0	0	0	0	0	0	0	0	0	0	0	0	0	0	0	0	0	0	0	0	0	0	0	0	0	0	0	0	0	0	0	0	0	0	0	0	0
[truncated: 905 more rows]
[truncated: 36 more columns]

## Sheet: Table S4 - Chemotaxis associati
Supplemental Table S4 – Chemotaxis associations
The table shows all significant associations between bacterial metabolic pathways and chemotaxis behavior in P. pacificus nematodes.
MPG	Description	Adjusted p-value
PWY-5669,	phosphatidylserine and phosphatidylethanolamine biosynthesis I	0.00553927
KDOSYN-PWY, PWY-8074, BACTERIOFERRITIN-PWY	Kdo transfer to lipid IVA I (E. coli), Kdo transfer to lipid IVA IV (P. putida), ferroxidase	0.0353493
PWY-5148, PWY-7216, PWY-7292	acyl-CoA hydrolysis, (R)- and (S)-3-hydroxybutanoate biosynthesis (engineered), oleate beta-oxidation (thioesterase-dependent, yeast)	0.000106527
PWY0-1554, PWY-5667	5-(methoxycarbonylmethoxy)uridine biosynthesis, CDP-diacylglycerol biosynthesis I	0.00556523
PWY-6892	thiazole component of thiamine diphosphate biosynthesis I	0.00692279
PWY0-1479,	tRNA processing	3.99047e-05
MQL6-NADH-OXIDO	NADH:menaquinone6 oxidoreductase	0.000252793
PWY0-1567, PWY0-1568	NADH to cytochrome bo oxidase electron transfer II, NADH to cytochrome bd oxidase electron transfer II	0.0264753
PWY-5964, PWY-7639, PWY-8168	MoCo	7.23273e-06
DARABITOLUTIL-PWY	D-arabitol degradation	0.00599123
PWY0-1477	ethanolamine utilization	0.0026506
PWY0-1280	ethylene glycol degradation	0.0158641
PWY3O-1801	palmitoleate biosynthesis	0.0197539
PWY-5329,	L-cysteine degradation III	0.0253482
PWY-5340	sulfate activation for sulfonation	0.0053395
TYRSYN,	L-tyrosine biosynthesis I	0.000252793
PWY-4261	glycerol degradation I	0.00530508
PWY0-1587,	6-L-threonylcarbamoyladenosine37-modified tRNA biosynthesis	0.0255963
RIBOSYN2-PWY	flavin biosynthesis I (bacteria and plants)	1.47735e-05
PROSYN-PWY, PWY-3341	L-proline biosynthesis I, L-proline biosynthesis II	0.00494387
PWY-5489	methyl parathion degradation	0.00289805
PWY1ZNC-1	assimilatory sulfate reduction IV	0.00287187
PWY-5516	D-xylose degradation II	0.0286329
PWY-6123	inosine-5-phosphate biosynthesis I	0.00171755

## Sheet: Tabls S5 - Survival association
Supplemental Table S5 – Survival associations
The table shows all significant associations between bacterial metabolic pathways and survival of P. pacificus nematodes.
MPG	Description	Adjusted p-value
THREONINE-DEG2-PWY	L-threonine degradation II	0.0327286
PWY-6902	chitin degradation II (Vibrio)	0.00632963
ADENOSYLHOMOCYSCAT-PWY,	L-methionine salvage from L-homocysteine	0.0218563
PWY0-1433	tetrahydromonapterin biosynthesis	0.0173674
PWY66-426	hydrogen sulfide biosynthesis II	0.0354146
TRPKYNCAT-PWY	L-tryptophan degradation IV (via indole-3-lactate)	0.0333814
GLUCOSE1PMETAB-PWY	glucose and glucose-1-phosphate degradation	0.0456803
PWY0-1264	biotin-carboxyl carrier protein assembly	0.0283145
PWY-5659,	GDP-mannose biosynthesis	0.0161356
PWY0-1338	polymyxin resistance	0.00206224
PWY0-1321	nitrate reduction III (dissimilatory)	0.0395232
PWY-8130	5-deoxyadenosine degradation I	0.0214166
PWY0-1299	arginine dependent acid resistance	0.047692
PWY-6823,	molybdopterin biosynthesis	0.0312319
PWY-8055, TRIGLSYN-PWY	palmitoyl ethanolamide biosynthesis, diacylglycerol and triacylglycerol biosynthesis	0.0237549
PWY-5389	3-methylthiopropanoate biosynthesis	0.00247694
PWY-7288,	fatty acid beta-oxidation VII	0.0229108
GLUCONSUPER-PWY	D-gluconate degradation	0.00944217
PWY-6961	L-ascorbate degradation II	0.00157407
PWY-6931	seleno-amino acid detoxification and volatilization I	0.00122584
PWY-6531,	mannitol cycle	0.00277112
PWY0-1597	prenylated FMNH2 biosynthesis	0.035941
MANNIDEG-PWY	mannitol degradation I	0.00465116
PWY-8180	acrylate degradation II	0.0256148
RIBOKIN-PWY	ribose phosphorylation	0.0202507
PWY0-1546, PWY-6012	muropeptide degradation,acyl carrier protein metabolism	0.0232652
ASPARAGINE-BIOSYNTHESIS	L-asparagine biosynthesis I	0.00327609
HOMOCYSDEGR-PWY, PWY-801	L-cysteine biosynthesis III (from L-homocysteine),homocysteine and cysteine interconversion	0.0452687
FD-NADH-OXIDO	Removed from MetaCyc	0.0291637
GLYCOLYSIS,	glycolysis I (from glucose 6-phosphate)	0.0228811
PWY-7955, PWY-7960	paerucumarin and rhabduscin biosynthesis	0.0256678
PWY0-1309	chitobiose degradation	0.0427299
ARGSPECAT-PWY, PWY0-1303	spermine and aminopropylcadaverine biosynthesis	0.00580852
PWY-6893, PWY-6894	thiamine diphosphate biosynthesis II (Bacillus), thiamine diphosphate biosynthesis I (E. coli)	0.0463878
PWY0-1296	purine ribonucleosides degradation	0.0437224
BSUBPOLYAMSYN-PWY, PWY-4361	spermidine biosynthesis I, S-methyl-5-thio-alpha-D-ribose 1-phosphate degradation I	0.00193136
PWY-7942	5-oxo-L-proline metabolism	0.044599
GLUAMCAT-PWY	N-acetylglucosamine degradation I	0.00824582
PWY0-1581	nitrate reduction IX (dissimilatory)	0.013163
PWY-5441	S-methyl-L-methionine cycle	0.0462935

## Sheet: Table S6 - Coexpression modules
Supplemental Table S6 – Coexpression modules
The table shows the assignment of P. pacificus genes to different coexpression modules.
Gene ID (El Paco Gene Annotation, version 3 (Athansouli et al. 2020 )	Module Number
PPA17027	1
ppa_stranded_DN8487_c0_g1_i1	1
ppa_stranded_DN25841_c0_g2_i2	1
PPA17014	1
PPA17011	1
PPA31706	1
ppa_stranded_DN22007_c0_g1_i1	1
ppa_stranded_DN20003_c0_g1_i2	1
PPA16998	1
PPA16996	1
ppa_stranded_DN21827_c0_g2_i1	1
PPA16991	1
PPA34316	1
PPA16980	1
PPA16977	1
PPA45824	1
PPA41874	1
PPA41877	1
PPA16943	1
PPA09973	1
PPA41883	1
PPA16925	1
ppa_stranded_DN28677_c1_g1_i1	1
PPA16922	1
PPA41884	1
PPA16908	1
PPA16900	1
PPA16898	1
PPA41905	1
ppa_stranded_DN28263_c0_g1_i1	1
ppa_stranded_DN30335_c1_g2_i4	1
ppa_stranded_DN25305_c0_g1_i1	1
PPA13478	1
Iso_D.106.2	1
PPA13066	1
PPA41968	1
ppa_stranded_DN26929_c2_g1_i1	1
PPA34325	1
Contig64-snapTAU.100	1
ppa_stranded_DN22004_c0_g1_i1	1
PPA12982	1
PPA12973	1
PPA41983	1
PPA12961	1
PPA41982	1
PPA32758	1
ppa_stranded_DN31419_c0_g5_i2	1
ppa_stranded_DN25774_c0_g1_i5	1
ppa_stranded_DN17854_c0_g1_i1	1
PPA12946	1
PPA34327	1
ppa_stranded_DN29095_c0_g1_i9	1
ppa_stranded_DN24717_c0_g1_i1	1
PPA41992	1
PPA41994	1
PPA12914	1
PPA12908	1
PPA29136	1
PPA29122	1
PPA29102	1
PPA29098	1
ppa_stranded_DN29104_c0_g2_i1	1
PPA34331	1
PPA42025	1
PPA29071	1
ppa_stranded_DN31163_c2_g9_i1	1
ppa_stranded_DN26609_c0_g2_i8	1
PPA29049	1
ppa_stranded_DN30926_c0_g3_i15	1
PPA42060	1
PPA42065	1
PPA42062	1
PPA25620	1
ppa_stranded_DN16793_c0_g1_i1	1
PPA25578	1
PPA42079	1
PPA42086	1
PPA42092	1
PPA42094	1
PPA05086	1
PPA42112	1
ppa_stranded_DN30723_c0_g2_i1	1
ppa_stranded_DN30723_c0_g1_i3	1
PPA09546	1
ppa_stranded_DN32660_c0_g1_i1	1
ppa_stranded_DN30790_c0_g1_i2	1
PPA42122	1
ppa_stranded_DN40784_c0_g1_i1	1
PPA09509	1
PPA09506	1
PPA09492	1
PPA09483	1
PPA42143	1
PPA09479	1
Contig9-snapTAU.98	1
PPA30633	1
ppa_stranded_DN23246_c0_g1_i1	1
PPA09447	1
PPA09436	1
PPA42167	1
PPA09425	1
PPA42158	1
PPA09407	1
PPA09404	1
PPA09396	1
PPA12343	1
PPA12342	1
PPA12335	1
ppa_stranded_DN48959_c0_g1_i1	1
PPA42185	1
PPA26864	1
PPA45925	1
PPA26903	1
Iso_D.432.1	1
PPA26887	1
PPA26923	1
ppa_stranded_DN31411_c1_g1_i2	1
PPA03988	1
PPA26949	1
PPA26951	1
PPA26955	1
PPA29764	1
ppa_stranded_DN26382_c0_g2_i2	1
PPA26963	1
PPA26966	1
PPA42233	1
PPA42224	1
PPA02034	1
ppa_stranded_DN26557_c0_g1_i1	1
PPA45938	1
PPA02058	1
PPA02070	1
PPA42254	1
PPA42255	1
PPA02073	1
PPA02077	1
PPA02078	1
PPA02085	1
PPA15673	1
ppa_stranded_DN16596_c0_g2_i1	1
PPA08068	1
PPA03965	1
PPA39220	1
PPA08051	1
ppa_stranded_DN27104_c1_g2_i1	1
PPA08049	1
PPA39217	1
PPA08046	1
PPA08044	1
PPA08043	1
PPA08042	1
PPA08041	1
ppa_stranded_DN26252_c0_g1_i1	1
ppa_stranded_DN25544_c0_g1_i1	1
PPA39211	1
PPA29244	1
PPA29220	1
ppa_stranded_DN22965_c0_g1_i2	1
ppa_stranded_DN26210_c0_g1_i1	1
PPA29209	1
PPA29208	1
Iso_D.577.2	1
PPA29192	1
PPA29188	1
PPA29187	1
PPA29186	1
PPA29183	1
Iso_D.594.1	1
ppa_stranded_DN25231_c0_g1_i1	1
PPA39189	1
ppa_stranded_DN18974_c0_g1_i1	1
PPA29161	1
PPA29145	1
ppa_stranded_DN19835_c0_g1_i1	1
PPA39182	1
PPA11763	1
Contig47-snapTAU.145	1
ppa_stranded_DN28348_c0_g1_i1	1
ppa_stranded_DN48797_c0_g1_i1	1
PPA39181	1
ppa_stranded_DN29633_c0_g2_i1	1
ppa_stranded_DN4787_c0_g1_i1	1
PPA11779	1
ppa_stranded_DN30270_c3_g1_i1	1
PPA29033	1
ppa_stranded_DN26070_c0_g1_i3	1
PPA29024	1
PPA29018	1
PPA29005	1
PPA39171	1
PPA19330	1
PPA28968	1
PPA28961	1
PPA38974	1
PPA38975	1
PPA38978	1
PPA28936	1
PPA20484	1
PPA28934	1
PPA28931	1
PPA28925	1
PPA28923	1
PPA28922	1
ppa_stranded_DN26754_c0_g1_i1	1
ppa_stranded_DN29269_c0_g1_i3	1
ppa_stranded_DN30480_c0_g1_i3	1
PPA01851	1
PPA01857	1
ppa_stranded_DN4240_c0_g1_i1	1
ppa_stranded_DN20124_c0_g1_i1	1
ppa_stranded_DN29071_c3_g1_i1	1
ppa_stranded_DN29767_c0_g2_i1	1
PPA01874	1
PPA39007	1
PPA01885	1
ppa_stranded_DN16532_c0_g1_i1	1
ppa_stranded_DN17888_c0_g1_i1	1
PPA01899	1
ppa_stranded_DN27568_c0_g2_i1	1
ppa_stranded_DN980_c0_g1_i1	1
ppa_stranded_DN29794_c0_g1_i1	1
PPA01914	1
ppa_stranded_DN18997_c0_g1_i2	1
ppa_stranded_DN21895_c0_g1_i3	1
PPA01923	1
PPA01933	1
ppa_stranded_DN21484_c0_g1_i1	1
ppa_stranded_DN21720_c0_g1_i1	1
PPA01930	1
PPA22420	1
PPA32326	1
PPA39024	1
ppa_stranded_DN16575_c0_g2_i1	1
ppa_stranded_DN17623_c0_g1_i1	1
ppa_stranded_DN16077_c0_g3_i1	1
PPA39023	1
PPA39028	1
PPA09877	1
PPA09867	1
PPA39041	1
PPA09858	1
PPA09860	1
PPA39036	1
PPA09845	1
PPA39045	1
PPA28815	1
ppa_stranded_DN27686_c0_g2_i1	1
ppa_stranded_DN29402_c0_g2_i2	1
ppa_stranded_DN4681_c0_g2_i1	1
PPA39049	1
ppa_stranded_DN29121_c0_g1_i6	1
ppa_stranded_DN4396_c0_g1_i1	1
PPA28786	1
ppa_stranded_DN20231_c0_g1_i2	1
PPA39063	1
ppa_stranded_DN8217_c0_g1_i1	1
PPA28806	1
PPA39064	1
PPA28812	1
Iso_D.875.1	1
ppa_stranded_DN25151_c1_g1_i1	1
ppa_stranded_DN9482_c0_g2_i1	1
PPA29765	1
PPA28819	1
PPA39070	1
ppa_stranded_DN31108_c1_g1_i3	1
ppa_stranded_DN24980_c0_g3_i2	1
ppa_stranded_DN28820_c0_g1_i4	1
PPA39073	1
PPA28840	1
PPA28844	1
ppa_stranded_DN25233_c0_g1_i1	1
ppa_stranded_DN31284_c1_g1_i2	1
ppa_stranded_DN23437_c0_g1_i1	1
ppa_stranded_DN30657_c4_g2_i4	1
ppa_stranded_DN30202_c0_g2_i2	1
PPA40244	1
ppa_stranded_DN18616_c0_g1_i1	1
ppa_stranded_DN26396_c0_g2_i1	1
ppa_stranded_DN25059_c0_g1_i2	1
ppa_stranded_DN28646_c0_g1_i3	1
ppa_stranded_DN25398_c0_g2_i2	1
ppa_stranded_DN26410_c0_g4_i1	1
PPA28894	1
ppa_stranded_DN25319_c0_g1_i2	1
PPA30813	1
ppa_stranded_DN28260_c0_g1_i3	1
PPA32674	1
ppa_stranded_DN26422_c1_g1_i1	1
PPA40232	1
ppa_stranded_DN30079_c0_g2_i5	1
isototal.422.1	1
ppa_stranded_DN28785_c0_g1_i4	1
PPA15762	1
PPA10389	1
ppa_stranded_DN27932_c0_g2_i1	1
PPA18612	1
ppa_stranded_DN36133_c0_g1_i1	1
PPA40228	1
Iso_D.1006.1	1
PPA10413	1
PPA40307	1
ppa_stranded_DN29717_c0_g4_i1	1
ppa_stranded_DN24882_c0_g1_i2	1
ppa_stranded_DN23323_c0_g1_i2	1
PPA15751	1
PPA37687	1
PPA37689	1
PPA33851	1
ppa_stranded_DN23423_c0_g1_i2	1
ppa_stranded_DN29749_c0_g2_i1	1
ppa_stranded_DN26389_c0_g1_i1	1
ppa_stranded_DN27850_c1_g2_i2	1
PPA37692	1
ppa_stranded_DN31237_c0_g2_i4	1
ppa_stranded_DN27299_c0_g2_i4	1
PPA10373	1
PPA33852	1
PPA10377	1
ppa_stranded_DN31071_c0_g1_i4	1
PPA37705	1
PPA37707	1
ppa_stranded_DN24763_c0_g1_i2	1
ppa_stranded_DN29210_c0_g3_i1	1
PPA37712	1
ppa_stranded_DN29422_c1_g1_i7	1
PPA37709	1
ppa_stranded_DN23833_c0_g2_i1	1
ppa_stranded_DN20251_c0_g2_i2	1
PPA30351	1
ppa_stranded_DN28716_c0_g2_i2	1
PPA37715	1
PPA37716	1
ppa_stranded_DN26751_c0_g1_i2	1
PPA37720	1
PPA37729	1
PPA44626	1
PPA37721	1
PPA32423	1
PPA31409	1
PPA27660	1
PPA37731	1
PPA27658	1
PPA37724	1
PPA20242	1
PPA37733	1
PPA13915	1
PPA13909	1
ppa_stranded_DN24897_c0_g2_i5	1
ppa_stranded_DN30657_c5_g2_i3	1
ppa_stranded_DN30992_c1_g8_i5	1
ppa_stranded_DN19832_c0_g1_i1	1
PPA27138	1
PPA37748	1
PPA14245	1
ppa_stranded_DN20474_c0_g1_i2	1
ppa_stranded_DN29195_c2_g2_i1	1
PPA14234	1
ppa_stranded_DN30517_c2_g1_i4	1
PPA14219	1
PPA14209	1
ppa_stranded_DN28435_c0_g4_i2	1
ppa_stranded_DN23612_c0_g1_i2	1
PPA14189	1
ppa_stranded_DN15884_c0_g1_i1	1
PPA37766	1
PPA37767	1
ppa_stranded_DN23316_c0_g1_i2	1
PPA14167	1
ppa_stranded_DN27283_c0_g1_i4	1
ppa_stranded_DN26838_c0_g1_i3	1
ppa_stranded_DN29077_c1_g1_i6	1
ppa_stranded_DN29552_c0_g2_i5	1
ppa_stranded_DN21836_c0_g1_i1	1
ppa_stranded_DN27631_c0_g1_i1	1
PPA33858	1
ppa_stranded_DN12886_c0_g1_i1	1
PPA14133	1
PPA14123	1
ppa_stranded_DN26155_c0_g1_i2	1
ppa_stranded_DN28740_c0_g3_i1	1
ppa_stranded_DN18046_c0_g1_i1	1
PPA14098	1
PPA37786	1
PPA14094	1
ppa_stranded_DN29254_c1_g1_i2	1
ppa_stranded_DN23985_c0_g1_i1	1
Contig14-snapTAU.327	1
PPA14065	1
PPA14055	1
ppa_stranded_DN24983_c0_g1_i2	1
ppa_stranded_DN30257_c0_g1_i5	1
ppa_stranded_DN25896_c0_g1_i4	1
PPA14043	1
PPA14041	1
ppa_stranded_DN31584_c0_g2_i4	1
ppa_stranded_DN31287_c1_g3_i1	1
ppa_stranded_DN30491_c0_g1_i4	1
ppa_stranded_DN26237_c0_g3_i1	1
ppa_stranded_DN17766_c0_g1_i1	1
PPA14011	1
PPA14030	1
PPA14027	1
PPA37799	1
PPA18906	1
PPA18907	1
ppa_stranded_DN31239_c1_g1_i3	1
PPA13996	1
ppa_stranded_DN31654_c0_g1_i1	1
PPA13990	1
PPA13978	1
ppa_stranded_DN25848_c0_g1_i2	1
ppa_stranded_DN31382_c0_g3_i1	1
PPA13964	1
PPA37805	1
ppa_stranded_DN21768_c0_g1_i1	1
ppa_stranded_DN18225_c0_g1_i1	1
PPA13953	1
ppa_stranded_DN16580_c0_g1_i1	1
ppa_stranded_DN30058_c1_g1_i2	1
PPA13949	1
PPA37814	1
ppa_stranded_DN29320_c0_g2_i3	1
ppa_stranded_DN27567_c0_g1_i2	1
PPA37820	1
PPA32385	1
PPA18932	1
PPA18938	1
PPA37826	1
ppa_stranded_DN29115_c0_g2_i1	1
ppa_stranded_DN31651_c3_g6_i1	1
ppa_stranded_DN24724_c0_g1_i3	1
PPA44659	1
PPA05290	1
PPA37833	1
PPA05288	1
PPA05286	1
PPA05285	1
PPA05283	1
PPA18972	1
PPA33861	1
PPA18992	1
PPA18993	1
PPA37840	1
ppa_stranded_DN19890_c0_g1_i1	1
ppa_stranded_DN27037_c0_g1_i1	1
PPA19018	1
PPA37843	1
PPA19026	1
PPA19027	1
Iso_D.1405.9	1
ppa_stranded_DN28768_c2_g2_i1	1
PPA19032	1
ppa_stranded_DN23142_c0_g2_i1	1
ppa_stranded_DN16675_c0_g2_i1	1
ppa_stranded_DN25077_c0_g1_i3	1
PPA19051	1
PPA19074	1
PPA19077	1
PPA19082	1
ppa_stranded_DN16638_c0_g1_i1	1
PPA19091	1
Contig70-snapTAU.31	1
PPA19093	1
PPA37864	1
PPA19103	1
PPA19113	1
PPA37868	1
isopolya.912.1	1
ppa_stranded_DN24861_c0_g1_i1	1
PPA37870	1
Iso_D.1457.1	1
PPA12687	1
PPA12656	1
PPA33870	1
PPA12630	1
PPA12629	1
ppa_stranded_DN17375_c0_g2_i1	1
PPA12617	1
PPA12611	1
ppa_stranded_DN21958_c0_g1_i2	1
ppa_stranded_DN16701_c0_g1_i1	1
PPA12603	1
PPA12596	1
PPA12590	1
ppa_stranded_DN29492_c0_g4_i1	1
ppa_stranded_DN31296_c1_g2_i8	1
ppa_stranded_DN31296_c1_g2_i2	1
Contig20-snapTAU.233	1
ppa_stranded_DN41473_c0_g1_i1	1
ppa_stranded_DN23729_c1_g2_i1	1
PPA12569	1
ppa_stranded_DN24704_c0_g1_i1	1
PPA12560	1
Contig20-snapTAU.209	1
PPA12557	1
PPA12544	1
PPA12541	1
PPA12535	1
PPA12533	1
ppa_stranded_DN30008_c0_g2_i1	1
ppa_stranded_DN29376_c0_g2_i1	1
ppa_stranded_DN27652_c0_g2_i1	1
PPA12509	1
PPA33872	1
PPA37911	1
Contig20-snapTAU.141	1
ppa_stranded_DN23834_c0_g1_i1	1
PPA37913	1
ppa_stranded_DN20512_c0_g1_i2	1
PPA12445	1
PPA12444	1
PPA37930	1
PPA40204	1
PPA10331	1
ppa_stranded_DN20442_c0_g1_i2	1
ppa_stranded_DN30196_c0_g1_i2	1
PPA34511	1
PPA34512	1
PPA34518	1
ppa_stranded_DN18867_c0_g1_i1	1
ppa_stranded_DN31223_c3_g1_i1	1
ppa_stranded_DN26085_c0_g1_i2	1
PPA34520	1
PPA34522	1
PPA03909	1
PPA18350	1
PPA34548	1
PPA18346	1
ppa_stranded_DN30724_c0_g2_i2	1
PPA23314	1
PPA18321	1
PPA19417	1
ppa_stranded_DN28067_c0_g1_i1	1
PPA18266	1
PPA18265	1
PPA18264	1
PPA18250	1
PPA18247	1
ppa_stranded_DN21712_c0_g1_i2	1
ppa_stranded_DN30358_c0_g1_i9	1
PPA18239	1
ppa_stranded_DN23347_c0_g1_i1	1
ppa_stranded_DN23768_c0_g1_i2	1
ppa_stranded_DN23827_c0_g1_i1	1
PPA34584	1
ppa_stranded_DN27005_c0_g2_i7	1
ppa_stranded_DN31219_c4_g1_i3	1
PPA34587	1
PPA18198	1
PPA34609	1
PPA34618	1
ppa_stranded_DN26493_c1_g1_i1	1
PPA18139	1
PPA18124	1
ppa_stranded_DN29278_c3_g1_i1	1
PPA33508	1
ppa_stranded_DN25727_c0_g1_i3	1
ppa_stranded_DN19039_c0_g1_i1	1
PPA34634	1
PPA34635	1
PPA43597	1
ppa_stranded_DN16840_c0_g2_i2	1
PPA30652	1
PPA18050	1
PPA18047	1
PPA18045	1
PPA14327	1
PPA34665	1
ppa_stranded_DN23255_c0_g1_i3	1
PPA02656	1
PPA34666	1
PPA31155	1
PPA02663	1
PPA02679	1
PPA02680	1
ppa_stranded_DN26781_c0_g1_i2	1
PPA26693	1
PPA34700	1
PPA34707	1
PPA26684	1
ppa_stranded_DN22983_c0_g1_i1	1
PPA26673	1
PPA21866	1
ppa_stranded_DN15999_c0_g1_i2	1
PPA26642	1
PPA26636	1
PPA34721	1
PPA26630	1
PPA34722	1
ppa_stranded_DN30666_c3_g2_i5	1
PPA33517	1
ppa_stranded_DN31147_c4_g1_i1	1
ppa_stranded_DN41518_c0_g1_i1	1
PPA34738	1
ppa_stranded_DN30695_c0_g1_i1	1
ppa_stranded_DN29051_c0_g1_i1	1
PPA26564	1
PPA34760	1
PPA26546	1
PPA26519	1
PPA34786	1
PPA26453	1
isopolya.1164.1	1
PPA26447	1
PPA26446	1
PPA34808	1
Iso_D.2040.1	1
PPA26427	1
PPA26421	1
PPA34809	1
PPA27343	1
PS312_c11627_g1_i2	1
ppa_stranded_DN31471_c3_g2_i10	1
ppa_stranded_DN19777_c0_g2_i1	1
ppa_stranded_DN31560_c5_g6_i2	1
PPA34816	1
PPA34814	1
PPA34819	1
PPA34821	1
PPA17766	1
Iso_D.2628.1	1
ppa_stranded_DN28887_c0_g1_i1	1
ppa_stranded_DN28269_c2_g2_i1	1
PPA17755	1
ppa_stranded_DN26698_c0_g2_i1	1
ppa_stranded_DN31560_c5_g2_i4	1
ppa_stranded_DN31560_c5_g1_i1	1
PPA17741	1
PPA34822	1
PPA17737	1
Contig18-snapTAU.45	1
Contig18-snapTAU.46	1
ppa_stranded_DN29547_c0_g1_i1	1
PPA27274	1
PPA17712	1
PPA17688	1
PPA17680	1
ppa_stranded_DN17625_c0_g1_i1	1
PPA17668	1
PPA17666	1
PPA34843	1
PPA17651	1
PPA33532	1
PPA17645	1
ppa_stranded_DN18301_c0_g1_i1	1
PPA17636	1
PPA17629	1
PPA17627	1
PPA34850	1
PPA15738	1
PPA34855	1
PPA09936	1
PPA03064	1
PPA03063	1
PPA03060	1
PPA34857	1
PPA31982	1
PPA03044	1
PPA31149	1
PPA03014	1
ppa_stranded_DN20213_c0_g2_i1	1
PPA34879	1
ppa_stranded_DN29342_c3_g4_i1	1
ppa_stranded_DN29342_c3_g2_i1	1
ppa_stranded_DN31370_c1_g2_i4	1
PPA08312	1
PPA34906	1
PPA34907	1
PPA34905	1
PPA34911	1
PPA34913	1
PPA34916	1
PPA34918	1
ppa_stranded_DN31313_c0_g1_i1	1
ppa_stranded_DN31313_c0_g1_i2	1
PPA07339	1
PPA07342	1
PPA07345	1
PPA07347	1
PPA07349	1
ppa_stranded_DN39718_c0_g1_i1	1
PPA31028	1
ppa_stranded_DN27772_c0_g1_i1	1
ppa_stranded_DN30713_c2_g2_i1	1
PPA24021	1
Contig26-snap.68	1
ppa_stranded_DN30770_c6_g6_i1	1
isototal.956.1	1
ppa_stranded_DN30495_c0_g2_i2	1
PPA33543	1
PPA24037	1
PPA34930	1
PPA34931	1
PPA24042	1
PPA20418	1
PPA34938	1
ppa_stranded_DN19011_c0_g2_i1	1
ppa_stranded_DN20635_c0_g1_i1	1
PPA24108	1
ppa_stranded_DN8722_c0_g1_i1	1
PPA04463	1
PPA04475	1
PPA04488	1
Contig26-snapTAU.209	1
ppa_stranded_DN22865_c0_g1_i1	1
ppa_stranded_DN31657_c1_g1_i1	1
PPA04519	1
ppa_stranded_DN26425_c0_g2_i1	1
PPA12356	1
ppa_stranded_DN20555_c0_g3_i1	1
PPA08667	1
PPA34998	1
PPA08682	1
PPA08707	1
PPA43731	1
PPA33555	1
PPA08722	1
PPA35011	1
PPA43735	1
PPA35016	1
ppa_stranded_DN18948_c0_g1_i1	1
PPA08767	1
PPA35023	1
PPA08773	1
PPA08789	1
PPA08793	1
PPA14212	1
PPA08796	1
PPA35031	1
PPA43745	1
PPA08808	1
PPA35039	1
PPA33560	1
PPA35047	1
ppa_stranded_DN21801_c0_g1_i1	1
PPA07102	1
ppa_stranded_DN20717_c0_g2_i1	1
PPA35056	1
PPA35057	1
PPA07077	1
PPA07073	1
PPA07066	1
ppa_stranded_DN28664_c0_g1_i3	1
PPA02254	1
ppa_stranded_DN27869_c0_g1_i1	1
ppa_stranded_DN385_c0_g1_i1	1
ppa_stranded_DN26906_c1_g2_i2	1
PPA38250	1
PPA38249	1
ppa_stranded_DN31246_c0_g1_i1	1
PPA38252	1
PPA07031	1
PPA38248	1
PPA07030	1
PPA07024	1
PPA07022	1
PPA07021	1
PPA38243	1
PPA38239	1
PPA07012	1
PPA07009	1
PPA07007	1
PPA07005	1
PPA38238	1
PPA07001	1
PPA31626	1
PPA06996	1
PPA06995	1
PPA06990	1
ppa_stranded_DN27257_c0_g3_i2	1
ppa_stranded_DN30583_c0_g2_i1	1
ppa_stranded_DN24614_c0_g1_i1	1
ppa_stranded_DN23155_c0_g1_i1	1
PPA06926	1
PPA06925	1
ppa_stranded_DN18802_c0_g1_i1	1
PPA06919	1
ppa_stranded_DN20405_c0_g1_i2	1
ppa_stranded_DN28718_c0_g1_i5	1
PPA06901	1
ppa_stranded_DN21673_c0_g1_i1	1
ppa_stranded_DN30555_c0_g1_i1	1
ppa_stranded_DN21249_c0_g2_i1	1
ppa_stranded_DN22985_c0_g1_i1	1
ppa_stranded_DN21115_c0_g2_i2	1
ppa_stranded_DN30312_c1_g2_i3	1
ppa_stranded_DN26919_c0_g1_i1	1
ppa_stranded_DN30312_c2_g2_i1	1
ppa_stranded_DN30312_c1_g3_i1	1
Contig19-snapTAU.287	1
ppa_stranded_DN26895_c0_g1_i1	1
ppa_stranded_DN16463_c0_g1_i1	1
Contig19-snapTAU.304	1
ppa_stranded_DN17614_c0_g1_i1	1
PPA32710	1
ppa_stranded_DN23402_c0_g1_i3	1
PPA17472	1
ppa_stranded_DN20678_c0_g1_i1	1
Iso_D.2657.1	1
PPA17512	1
ppa_stranded_DN28423_c0_g1_i3	1
ppa_stranded_DN26077_c0_g1_i2	1
PPA17530	1
PPA38206	1
PPA17533	1
ppa_stranded_DN34976_c0_g1_i1	1
ppa_stranded_DN1105_c0_g1_i1	1
ppa_stranded_DN18400_c0_g1_i1	1
ppa_stranded_DN2254_c0_g1_i1	1
ppa_stranded_DN18541_c0_g2_i1	1
PPA17548	1
PPA17555	1
PPA17556	1
Iso_D.2685.1	1
ppa_stranded_DN25880_c0_g1_i3	1
PPA38194	1
PPA13222	1
ppa_stranded_DN25276_c0_g1_i1	1
ppa_stranded_DN30144_c1_g1_i1	1
PPA08413	1
ppa_stranded_DN21373_c0_g1_i1	1
PPA38187	1
PPA08424	1
ppa_stranded_DN15720_c0_g1_i1	1
ppa_stranded_DN15284_c0_g1_i1	1
ppa_stranded_DN28196_c0_g2_i4	1
PPA08444	1
PPA08448	1
PPA08455	1
PPA38178	1
PPA38176	1
ppa_stranded_DN31373_c1_g1_i1	1
PPA31176	1
Iso_D.2941.1	1
ppa_stranded_DN9953_c0_g1_i1	1
ppa_stranded_DN28352_c0_g2_i1	1
ppa_stranded_DN18705_c0_g1_i1	1
PPA20096	1
ppa_stranded_DN30730_c1_g1_i2	1
PPA20102	1
PPA20099	1
PPA20100	1
PPA20109	1
PPA38159	1
ppa_stranded_DN29636_c0_g1_i1	1
ppa_stranded_DN26851_c0_g1_i1	1
Contig84-snapTAU.60	1
PPA31093	1
PPA20178	1
PPA20187	1
ppa_stranded_DN25789_c0_g2_i1	1
PPA20195	1
PPA20196	1
Iso_D.2752.1	1
Iso_D.2753.4	1
PPA10459	1
ppa_stranded_DN18385_c0_g1_i1	1
ppa_stranded_DN20155_c0_g1_i1	1
ppa_stranded_DN30344_c1_g3_i9	1
PPA10471	1
PPA38564	1
PPA10477	1
ppa_stranded_DN4195_c0_g1_i1	1
PPA30629	1
PPA27372	1
ppa_stranded_DN21942_c0_g1_i1	1
PPA38553	1
PPA27353	1
ppa_stranded_DN17912_c0_g2_i1	1
ppa_stranded_DN21986_c0_g1_i2	1
ppa_stranded_DN29342_c3_g5_i1	1
PPA27337	1
PPA27335	1
PPA33937	1
PPA27332	1
PPA27326	1
ppa_stranded_DN40064_c0_g1_i1	1
ppa_stranded_DN15651_c0_g1_i2	1
Contig44-snapTAU.86	1
PPA27311	1
PPA27306	1
ppa_stranded_DN29045_c0_g1_i2	1
PPA27285	1
PPA38534	1
PPA38533	1
ppa_stranded_DN25590_c0_g2_i1	1
ppa_stranded_DN18639_c1_g1_i1	1
ppa_stranded_DN8012_c0_g1_i1	1
ppa_stranded_DN29005_c0_g1_i1	1
PPA27271	1
ppa_stranded_DN20088_c0_g1_i1	1
ppa_stranded_DN29858_c0_g1_i1	1
PPA27261	1
ppa_stranded_DN20415_c0_g2_i1	1
ppa_stranded_DN27485_c0_g1_i6	1
PPA27254	1
PPA27249	1
PPA38525	1
PPA27247	1
PPA17435	1
ppa_stranded_DN30232_c0_g1_i4	1
PPA38520	1
PPA17428	1
PPA18421	1
PPA17420	1
PPA17411	1
PPA17410	1
PPA17407	1
PPA17404	1
ppa_stranded_DN19599_c0_g1_i1	1
ppa_stranded_DN18318_c0_g1_i1	1
ppa_stranded_DN20705_c0_g1_i1	1
ppa_stranded_DN27620_c2_g2_i3	1
ppa_stranded_DN30075_c0_g2_i4	1
PPA17391	1
ppa_stranded_DN25924_c0_g1_i2	1
PPA21830	1
ppa_stranded_DN23795_c0_g1_i1	1
ppa_stranded_DN24999_c0_g1_i2	1
PPA21821	1
ppa_stranded_DN27919_c0_g2_i2	1
ppa_stranded_DN28859_c0_g1_i1	1
PPA33008	1
ppa_stranded_DN24785_c0_g2_i1	1
ppa_stranded_DN27914_c1_g1_i2	1
Iso_D.4045.1	1
PPA21807	1
ppa_stranded_DN26826_c0_g2_i6	1
ppa_stranded_DN26030_c0_g2_i1	1
ppa_stranded_DN31537_c8_g1_i1	1
ppa_stranded_DN31315_c0_g2_i2	1
ppa_stranded_DN30053_c0_g1_i1	1
PPA38500	1
PPA21772	1
isototal.1253.3	1
PPA29266	1
PPA21762	1
PPA21761	1
ppa_stranded_DN31157_c1_g1_i5	1
ppa_stranded_DN29114_c1_g4_i1	1
PPA21750	1
ppa_stranded_DN19847_c0_g1_i2	1
PPA21747	1
PPA21732	1
PPA38497	1
ppa_stranded_DN27029_c0_g1_i4	1
ppa_stranded_DN21648_c0_g1_i2	1
ppa_stranded_DN25799_c1_g2_i2	1
PPA21723	1
PPA21715	1
PPA21714	1
ppa_stranded_DN27145_c0_g2_i2	1
PPA21704	1
PPA38489	1
PPA21700	1
PPA21699	1
PPA21685	1
PPA20515	1
PPA21680	1
ppa_stranded_DN20673_c0_g1_i1	1
PPA21679	1
PPA21673	1
ppa_stranded_DN27382_c2_g1_i3	1
PPA21665	1
ppa_stranded_DN26204_c0_g3_i2	1
PPA21659	1
ppa_stranded_DN30296_c1_g1_i1	1
PPA21650	1
ppa_stranded_DN25780_c0_g1_i1	1
PPA38482	1
PPA21642	1
PPA28749	1
PPA28744	1
PPA28737	1
ppa_stranded_DN1075_c0_g1_i1	1
ppa_stranded_DN24165_c0_g1_i1	1
ppa_stranded_DN24689_c0_g1_i1	1
UMM-S207-4.20-mRNA-1_frag_1	1
ppa_stranded_DN20621_c0_g2_i1	1
ppa_stranded_DN23048_c0_g1_i1	1
PPA28710	1
ppa_stranded_DN29610_c0_g2_i1	1
ppa_stranded_DN24906_c0_g2_i5	1
ppa_stranded_DN27773_c0_g1_i1	1
PPA18468	1
PPA44906	1
PPA28694	1
ppa_stranded_DN28339_c1_g1_i1	1
PPA28675	1
PPA44901	1
PPA38461	1
PPA28661	1
ppa_stranded_DN28368_c0_g2_i3	1
PPA28652	1
ppa_stranded_DN30554_c0_g2_i14	1
ppa_stranded_DN15552_c0_g1_i1	1
ppa_stranded_DN23133_c0_g2_i1	1
PPA33742	1
PPA28639	1
PPA28637	1
PPA28635	1
ppa_stranded_DN31092_c1_g2_i3	1
ppa_stranded_DN26305_c0_g1_i1	1
PPA31567	1
ppa_stranded_DN25314_c0_g1_i1	1
Iso_D.3144.1	1
PPA28603	1
ppa_stranded_DN23884_c0_g1_i1	1
ppa_stranded_DN23045_c1_g1_i1	1
PPA36901	1
ppa_stranded_DN27249_c0_g1_i1	1
isototal.1381.3	1
PPA28597	1
ppa_stranded_DN20754_c0_g1_i1	1
ppa_stranded_DN27801_c0_g1_i3	1
ppa_stranded_DN27385_c0_g2_i2	1
ppa_stranded_DN21196_c0_g1_i1	1
PPA23817	1
Iso_D.3171.3	1
ppa_stranded_DN31364_c6_g1_i1	1
PPA23811	1
ppa_stranded_DN44608_c0_g1_i1	1
ppa_stranded_DN25426_c0_g1_i1	1
ppa_stranded_DN25940_c0_g1_i1	1
ppa_stranded_DN19206_c0_g1_i1	1
ppa_stranded_DN24587_c0_g1_i5	1
ppa_stranded_DN27247_c0_g1_i2	1
PPA23795	1
PPA36908	1
PPA36904	1
ppa_stranded_DN27050_c0_g1_i1	1
ppa_stranded_DN31231_c2_g1_i2	1
seq5	1
ppa_stranded_DN12634_c0_g1_i1	1
Iso_D.3197.1	1
ppa_stranded_DN27059_c0_g1_i4	1
ppa_stranded_DN16542_c0_g2_i1	1
ppa_stranded_DN23943_c0_g1_i1	1
ppa_stranded_DN28224_c0_g1_i3	1
PPA23757	1
PPA23754	1
PPA36912	1
PPA36913	1
ppa_stranded_DN40200_c0_g1_i1	1
Contig37-snapTAU.234	1
PPA23737	1
ppa_stranded_DN29807_c0_g1_i1	1
PPA23732	1
PPA23728	1
PPA36922	1
Iso_D.3383.3	1
Contig37-snapTAU.206	1
PPA23705	1
PPA36927	1
ppa_stranded_DN20764_c0_g1_i1	1
ppa_stranded_DN20255_c0_g1_i1	1
ppa_stranded_DN31094_c6_g1_i1	1
ppa_stranded_DN29416_c0_g1_i1	1
PPA23690	1
Contig37-snapTAU.187	1
PPA23684	1
PPA23682	1
PPA23670	1
PPA26451	1
ppa_stranded_DN31125_c0_g1_i2	1
ppa_stranded_DN30090_c1_g1_i1	1
PPA22414	1
PPA36938	1
PPA17803	1
PPA26268	1
PPA36950	1
ppa_stranded_DN4131_c0_g1_i1	1
PPA26279	1
PPA36955	1
PPA36956	1
PPA26281	1
PPA26291	1
ppa_stranded_DN31388_c0_g10_i1	1
PPA26292	1
ppa_stranded_DN18440_c0_g1_i1	1
ppa_stranded_DN30560_c7_g4_i1	1
ppa_stranded_DN30560_c0_g1_i1	1
ppa_stranded_DN22988_c0_g1_i1	1
ppa_stranded_DN23718_c0_g2_i1	1
ppa_stranded_DN36927_c0_g1_i1	1
PPA36966	1
PPA36969	1
ppa_stranded_DN24199_c0_g1_i1	1
PPA26331	1
ppa_stranded_DN23720_c0_g1_i2	1
PPA26338	1
PPA26344	1
PPA26345	1
PPA36970	1
ppa_stranded_DN21200_c0_g1_i1	1
ppa_stranded_DN23533_c0_g1_i2	1
ppa_stranded_DN15776_c0_g1_i1	1
ppa_stranded_DN15079_c0_g1_i1	1
ppa_stranded_DN24375_c0_g1_i2	1
PPA36973	1
PPA36976	1
PPA36975	1
PPA36977	1
ppa_stranded_DN30570_c0_g2_i1	1
ppa_stranded_DN29822_c0_g2_i1	1
PPA26385	1
PPA26392	1
PPA36981	1
PPA44390	1
PPA19137	1
ppa_stranded_DN24649_c0_g1_i2	1
ppa_stranded_DN24574_c0_g2_i1	1
PPA32429	1
ppa_stranded_DN26457_c0_g1_i1	1
PPA00019	1
PPA00025	1
Contig1-snapTAU.41	1
ppa_stranded_DN31345_c1_g1_i9	1
ppa_stranded_DN24874_c1_g1_i1	1
ppa_stranded_DN31439_c1_g1_i1	1
PPA00042	1
PPA00044	1
ppa_stranded_DN27812_c1_g1_i2	1
PPA00047	1
ppa_stranded_DN25034_c0_g2_i3	1
PPA00063	1
ppa_stranded_DN14648_c0_g1_i1	1
PPA00074	1
PPA00075	1
PPA00076	1
PPA00081	1
PPA37001	1
ppa_stranded_DN28606_c1_g1_i1	1
ppa_stranded_DN29263_c0_g2_i1	1
PPA00098	1
PPA00102	1
PPA37011	1
ppa_stranded_DN29712_c1_g1_i1	1
PPA37007	1
ppa_stranded_DN21755_c0_g1_i1	1
PPA37019	1
PPA00120	1
PPA00128	1
PPA00133	1
PPA00134	1
PPA00142	1
PPA00156	1
PPA00161	1
ppa_stranded_DN3970_c0_g1_i1	1
PPA37031	1
ppa_stranded_DN27574_c0_g2_i1	1
isototal.1523.1	1
PPA44409	1
ppa_stranded_DN1467_c0_g1_i1	1
PPA37033	1
PPA37034	1
PPA31079	1
PPA00188	1
PPA33431	1
PPA00195	1
PPA33764	1
PPA00215	1
PPA00217	1
PPA37042	1
PPA00221	1
PPA00238	1
PPA00242	1
PPA00243	1
PPA00244	1
PPA00251	1
PPA00256	1
PPA00260	1
ppa_stranded_DN24843_c0_g2_i1	1
ppa_stranded_DN27815_c1_g2_i1	1
ppa_stranded_DN25280_c0_g1_i1	1
ppa_stranded_DN23092_c0_g1_i2	1
PPA00279	1
PPA00284	1
PPA00286	1
PPA37059	1
PPA00294	1
PPA37066	1
PPA00309	1
PPA00311	1
PPA37067	1
ppa_stranded_DN18126_c0_g1_i1	1
PPA00326	1
ppa_stranded_DN8724_c0_g1_i1	1
PPA37069	1
PPA00338	1
PPA00346	1
PPA37073	1
Iso_D.3657.2	1
PPA00351	1
PPA37078	1
PPA00367	1
Iso_D.3679.2	1
PPA00381	1
PPA30246	1
PPA00386	1
PPA00394	1
PPA00396	1
PPA00397	1
ppa_stranded_DN23507_c0_g2_i1	1
ppa_stranded_DN27290_c2_g1_i1	1
PPA00412	1
PPA00415	1
PPA00257	1
PPA00422	1
PPA37095	1
PPA37091	1
PPA37093	1
PPA00437	1
PPA00440	1
PPA00443	1
PPA00450	1
PPA37099	1
PPA00457	1
PPA00459	1
ppa_stranded_DN21419_c0_g1_i1	1
PPA00474	1
ppa_stranded_DN23618_c0_g2_i3	1
PPA00483	1
PPA00488	1
PPA00493	1
PPA31681	1
ppa_stranded_DN31239_c0_g1_i2	1
ppa_stranded_DN25849_c0_g3_i1	1
PPA37117	1
PPA37119	1
PPA37120	1
PPA37121	1
PPA00520	1
PPA37126	1
PPA38270	1
PPA38290	1
PPA44847	1
PPA22539	1
PPA38324	1
PPA22534	1
ppa_stranded_DN28806_c0_g2_i1	1
ppa_stranded_DN20637_c0_g1_i3	1
ppa_stranded_DN30364_c1_g2_i2	1
ppa_stranded_DN30476_c0_g2_i1	1
PPA38336	1
PPA22514	1
PPA22503	1
PPA38347	1
PPA38342	1
PPA38349	1
PPA22487	1
PPA22486	1
PPA22483	1
PPA20757	1
PPA38350	1
isototal.1633.1	1
ppa_stranded_DN23081_c0_g1_i1	1
ppa_stranded_DN29003_c0_g1_i5	1
PPA38355	1
PPA38353	1
PPA22454	1
PPA22453	1
ppa_stranded_DN30834_c7_g4_i1	1
PPA22436	1
PPA16789	1
PPA38359	1
PPA33923	1
PPA38364	1
PPA24452	1
ppa_stranded_DN19143_c0_g1_i1	1
PPA24457	1
ppa_stranded_DN27720_c0_g1_i1	1
ppa_stranded_DN23916_c0_g1_i1	1
PPA24512	1
PPA24515	1
PPA24518	1
ppa_stranded_DN9648_c0_g2_i1	1
PPA24528	1
PPA29048	1
PPA38390	1
PPA38395	1
PPA24552	1
Contig15-snapTAU.259	1
ppa_stranded_DN31281_c4_g1_i2	1
PPA38400	1
PPA28172	1
PPA38404	1
PPA38405	1
PPA24998	1
PPA38412	1
PPA24993	1
PPA38413	1
ppa_stranded_DN28938_c1_g1_i1	1
PPA24989	1
PPA24980	1
PPA24974	1
PPA38414	1
ppa_stranded_DN19908_c0_g1_i1	1
ppa_stranded_DN27420_c0_g1_i1	1
PPA24964	1
PPA24947	1
PPA24950	1
ppa_stranded_DN22101_c0_g2_i1	1
ppa_stranded_DN21099_c0_g1_i2	1
PPA38417	1
PPA38416	1
PPA44893	1
ppa_stranded_DN22995_c0_g1_i1	1
ppa_stranded_DN30659_c1_g2_i1	1
PPA33927	1
PPA31717	1
PPA33370	1
PPA24926	1
ppa_stranded_DN20438_c0_g1_i1	1
ppa_stranded_DN7059_c0_g1_i1	1
ppa_stranded_DN19239_c1_g2_i1	1
ppa_stranded_DN29123_c0_g2_i1	1
PPA24915	1
ppa_stranded_DN26016_c0_g1_i1	1
PPA24912	1
ppa_stranded_DN29474_c0_g2_i7	1
ppa_stranded_DN29329_c0_g1_i3	1
PPA44896	1
ppa_stranded_DN30677_c4_g1_i5	1
ppa_stranded_DN30677_c3_g1_i1	1
PPA38436	1
PPA24896	1
PPA24884	1
PPA24882	1
PPA38440	1
ppa_stranded_DN31092_c1_g6_i1	1
Contig102-snapTAU.84	1
PPA38443	1
PPA39481	1
ppa_stranded_DN28649_c0_g1_i1	1
PPA39485	1
PPA39477	1
PPA23430	1
PPA39487	1
UMA-S296-1.10-mRNA-1_ptc	1
PPA23423	1
PPA23420	1
Contig6-snapTAU.412	1
PPA23406	1
ppa_stranded_DN19945_c0_g1_i1	1
ppa_stranded_DN16130_c0_g2_i1	1
PPA23400	1
ppa_stranded_DN27199_c0_g1_i1	1
ppa_stranded_DN26211_c0_g1_i4	1
ppa_stranded_DN24751_c0_g2_i1	1
PPA23389	1
PPA45218	1
PPA39510	1
ppa_stranded_DN32724_c0_g1_i1	1
ppa_stranded_DN25229_c0_g4_i1	1
PPA23380	1
isopolya.2284.1	1
PPA39511	1
ppa_stranded_DN31804_c0_g1_i1	1
PPA23368	1
PPA23363	1
ppa_stranded_DN8664_c0_g1_i1	1
ppa_stranded_DN24333_c0_g2_i1	1
ppa_stranded_DN31595_c4_g1_i1	1
PPA23341	1
PPA23338	1
PPA39526	1
PPA31811	1
PPA39547	1
ppa_stranded_DN28565_c1_g1_i3	1
PPA10093	1
ppa_stranded_DN31157_c1_g2_i2	1
PPA10102	1
PPA10105	1
PPA10131	1
PPA10144	1
PPA32974	1
PPA10150	1
ppa_stranded_DN19220_c0_g2_i1	1
PPA35098	1
PPA10170	1
PPA35105	1
PPA35118	1
PPA35119	1
PPA10234	1
PPA35121	1
ppa_stranded_DN25020_c0_g1_i1	1
ppa_stranded_DN30161_c4_g11_i1	1
PPA19231	1
PPA35144	1
PPA33577	1
ppa_stranded_DN29727_c3_g2_i1	1
Iso_D.4307.2	1
PPA11722	1
PPA19275	1
PPA33578	1
PPA04274	1
PPA32451	1
PPA04304	1
PPA35191	1
PPA04322	1
PPA04336	1
PPA09949	1
PPA35220	1
ppa_stranded_DN28527_c0_g1_i9	1
PPA35225	1
PPA35226	1
PPA07383	1
PPA35235	1
PPA04576	1
ppa_stranded_DN27130_c0_g2_i2	1
ppa_stranded_DN26970_c0_g2_i1	1
PPA04538	1
ppa_stranded_DN23570_c0_g1_i1	1
ppa_stranded_DN30633_c0_g1_i6	1
ppa_stranded_DN30151_c0_g1_i3	1
ppa_stranded_DN26355_c0_g1_i5	1
Contig38-snapTAU.119	1
PPA35285	1
ppa_stranded_DN26818_c0_g1_i2	1
ppa_stranded_DN27824_c0_g6_i1	1
ppa_stranded_DN27824_c0_g5_i2	1
PPA08800	1
PPA10543	1
ppa_stranded_DN30161_c4_g8_i1	1
ppa_stranded_DN30161_c4_g1_i2	1
PPA19375	1
PPA19380	1
ppa_stranded_DN30130_c0_g2_i3	1
ppa_stranded_DN27500_c0_g1_i1	1
PPA19394	1
PPA19396	1
PPA19402	1
PPA19409	1
PPA35323	1
PPA35326	1
PPA35337	1
PPA19480	1
PPA19481	1
PPA19487	1
PPA19488	1
ppa_stranded_DN26757_c0_g1_i3	1
PPA43868	1
PPA09812	1
PPA09826	1
PPA09831	1
PPA09833	1
PPA09834	1
PPA09835	1
PPA09836	1
PPA09837	1
PPA43872	1
PPA33002	1
PPA27575	1
PPA07311	1
PPA21388	1
PPA35380	1
PPA21376	1
PPA21375	1
PPA35387	1
PPA35388	1
PPA21358	1
PPA35391	1
PPA21350	1
PPA35394	1
ppa_stranded_DN31432_c0_g1_i1	1
ppa_stranded_DN27104_c2_g1_i2	1
PPA21334	1
ppa_stranded_DN15819_c0_g1_i2	1
PPA21315	1
ppa_stranded_DN30279_c0_g1_i5	1
ppa_stranded_DN31494_c1_g5_i2	1
Contig65-snapTAU.14	1
PPA35406	1
ppa_stranded_DN27858_c0_g1_i1	1
ppa_stranded_DN31352_c2_g1_i1	1
ppa_stranded_DN31352_c5_g1_i2	1
ppa_stranded_DN21003_c0_g1_i1	1
PPA20905	1
PPA20906	1
PPA35415	1
PPA43890	1
PPA35410	1
ppa_stranded_DN20766_c0_g1_i1	1
PPA20968	1
PPA20971	1
PPA20984	1
PPA20988	1
ppa_stranded_DN10266_c0_g1_i1	1
PPA21011	1
PPA21012	1
PPA21016	1
PPA21018	1
ppa_stranded_DN31594_c3_g4_i3	1
PPA35446	1
PPA21040	1
PPA21043	1
PPA29748	1
ppa_stranded_DN31594_c1_g1_i1	1
PPA35455	1
PPA35456	1
PPA02830	1
PPA02836	1
PPA02841	1
PPA02847	1
ppa_stranded_DN29788_c5_g2_i6	1
isopolya.2546.1	1
ppa_stranded_DN29112_c0_g4_i1	1
ppa_stranded_DN29112_c0_g2_i2	1
ppa_stranded_DN29112_c0_g1_i1	1
ppa_stranded_DN35067_c0_g1_i1	1
ppa_stranded_DN48251_c0_g1_i1	1
ppa_stranded_DN31157_c1_g4_i5	1
ppa_stranded_DN29925_c0_g1_i1	1
PPA28014	1
PPA02897	1
PPA02898	1
PPA19734	1
ppa_stranded_DN26089_c0_g1_i1	1
ppa_stranded_DN19140_c0_g1_i1	1
PPA28025	1
ppa_stranded_DN29789_c0_g1_i19	1
PPA28065	1
PPA35481	1
ppa_stranded_DN29147_c0_g2_i1	1
PPA28066	1
PPA28081	1
PPA28103	1
PPA28110	1
PPA28112	1
PPA28115	1
PPA28118	1
PPA28119	1
PPA28120	1
PPA35494	1
PPA14777	1
ppa_stranded_DN31011_c3_g3_i13	1
PPA19144	1
ppa_stranded_DN31685_c0_g6_i5	1
PPA28155	1
ppa_stranded_DN28955_c0_g1_i5	1
ppa_stranded_DN13778_c0_g2_i1	1
PPA28163	1
PPA28173	1
ppa_stranded_DN10279_c0_g1_i1	1
Contig24-snapTAU.151	1
ppa_stranded_DN28865_c0_g1_i2	1
ppa_stranded_DN8968_c0_g1_i1	1
UMA-S10-75.68-mRNA-1_frag	1
ppa_stranded_DN25823_c0_g2_i1	1
PPA28195	1
PPA28212	1
ppa_stranded_DN27542_c0_g1_i1	1
PPA28235	1
PPA25969	1
ppa_stranded_DN19639_c0_g1_i1	1
ppa_stranded_DN30494_c0_g1_i2	1
ppa_stranded_DN30494_c0_g2_i1	1
ppa_stranded_DN29425_c0_g2_i1	1
ppa_stranded_DN30447_c1_g1_i2	1
ppa_stranded_DN25381_c0_g1_i1	1
ppa_stranded_DN30645_c5_g1_i1	1
ppa_stranded_DN31144_c5_g7_i1	1
PPA24088	1
PPA24441	1
PPA35527	1
PPA35528	1
ppa_stranded_DN278_c0_g2_i1	1
isopolya.2649.1	1
PPA28256	1
PPA35542	1
Contig24-snapTAU.265	1
PPA28290	1
PPA28291	1
PPA35546	1
ppa_stranded_DN30168_c0_g1_i3	1
PPA35551	1
PPA28302	1
ppa_stranded_DN23120_c0_g1_i3	1
PPA28309	1
ppa_stranded_DN27083_c0_g1_i10	1
ppa_stranded_DN30645_c5_g1_i2	1
ppa_stranded_DN29840_c0_g1_i5	1
PPA23307	1
PPA28344	1
PPA28347	1
ppa_stranded_DN31025_c2_g5_i1	1
PPA28356	1
PPA03589	1
PPA03586	1
PPA35563	1
PPA35559	1
PPA35560	1
ppa_stranded_DN30563_c1_g1_i2	1
PPA09125	1
ppa_stranded_DN31265_c1_g10_i1	1
PPA09141	1
PPA09143	1
ppa_stranded_DN30029_c2_g2_i1	1
PPA35573	1
PPA09152	1
PPA09153	1
PPA09159	1
PPA09160	1
ppa_stranded_DN25421_c0_g2_i2	1
ppa_stranded_DN30677_c2_g1_i4	1
PPA35578	1
PPA35575	1
PPA35576	1
ppa_stranded_DN27563_c0_g1_i1	1
ppa_stranded_DN30382_c0_g1_i2	1
ppa_stranded_DN29420_c0_g4_i1	1
ppa_stranded_DN30513_c2_g5_i1	1
PPA08309	1
PPA27636	1
PPA10323	1
PPA22592	1
PPA35586	1
PPA20408	1
PPA22595	1
ppa_stranded_DN24006_c0_g2_i1	1
PPA22607	1
PPA31518	1
PPA22609	1
ppa_stranded_DN25576_c0_g1_i2	1
Iso_D.5045.2	1
ppa_stranded_DN36738_c0_g1_i1	1
ppa_stranded_DN26878_c0_g1_i3	1
PPA22619	1
PPA22622	1
PPA19531	1
ppa_stranded_DN28983_c0_g1_i1	1
ppa_stranded_DN28991_c0_g1_i6	1
ppa_stranded_DN21636_c0_g3_i1	1
PPA22634	1
ppa_stranded_DN20807_c0_g2_i1	1
PPA35591	1
ppa_stranded_DN21714_c0_g2_i2	1
ppa_stranded_DN29458_c0_g1_i1	1
PPA35590	1
PPA22641	1
PPA22643	1
ppa_stranded_DN7028_c0_g1_i1	1
ppa_stranded_DN24109_c0_g1_i1	1
PPA35594	1
ppa_stranded_DN27494_c0_g1_i3	1
PPA22650	1
PPA35596	1
PPA22655	1
ppa_stranded_DN30433_c0_g9_i1	1
PPA22661	1
isototal.2131.1	1
ppa_stranded_DN10043_c0_g1_i1	1
PPA22672	1
Contig31-snapTAU.192	1
ppa_stranded_DN21997_c0_g1_i1	1
PPA22685	1
ppa_stranded_DN27779_c0_g1_i1	1
ppa_stranded_DN39871_c0_g1_i1	1
ppa_stranded_DN21705_c0_g1_i2	1
PPA22691	1
ppa_stranded_DN27195_c0_g1_i1	1
ppa_stranded_DN29420_c0_g1_i3	1
ppa_stranded_DN29420_c0_g3_i1	1
PPA22697	1
PPA22698	1
ppa_stranded_DN31603_c2_g1_i1	1
ppa_stranded_DN28607_c1_g1_i4	1
ppa_stranded_DN18188_c0_g2_i1	1
ppa_stranded_DN16691_c0_g1_i1	1
PPA31461	1
PPA30977	1
ppa_stranded_DN23076_c0_g1_i2	1
ppa_stranded_DN8759_c0_g2_i1	1
ppa_stranded_DN25302_c0_g2_i1	1
ppa_stranded_DN26494_c0_g3_i2	1
PPA22709	1
ppa_stranded_DN1667_c0_g1_i1	1
PPA22720	1
PPA35606	1
PPA22725	1
PPA22726	1
PPA35615	1
PPA35608	1
Contig31-snapTAU.249	1
PPA22737	1
PPA22742	1
ppa_stranded_DN23747_c0_g2_i1	1
PPA40110	1
ppa_stranded_DN28176_c1_g1_i1	1
ppa_stranded_DN27098_c0_g1_i1	1
ppa_stranded_DN25675_c0_g1_i2	1
ppa_stranded_DN31030_c0_g1_i7	1
ppa_stranded_DN26352_c0_g2_i2	1
ppa_stranded_DN23395_c0_g1_i3	1
isopolya.2844.1	1
PPA31661	1
PPA22764	1
isototal.2214.1	1
ppa_stranded_DN16484_c0_g1_i1	1
PPA01940	1
Contig31-snapTAU.282	1
ppa_stranded_DN23497_c0_g1_i3	1
PPA22779	1
PPA22782	1
ppa_stranded_DN23957_c0_g1_i5	1
ppa_stranded_DN33073_c0_g1_i1	1
isototal.2211.3	1
ppa_stranded_DN26864_c0_g1_i6	1
PPA22792	1
ppa_stranded_DN25756_c0_g1_i2	1
PPA22808	1
ppa_stranded_DN27778_c1_g1_i1	1
ppa_stranded_DN45090_c0_g1_i1	1
PPA22812	1
ppa_stranded_DN18747_c0_g1_i1	1
ppa_stranded_DN29440_c0_g2_i1	1
PPA34100	1
ppa_stranded_DN19977_c0_g1_i2	1
ppa_stranded_DN26086_c0_g2_i2	1
PPA40120	1
PPA12806	1
PPA12810	1
ppa_stranded_DN23442_c0_g1_i1	1
ppa_stranded_DN29325_c0_g1_i5	1
ppa_stranded_DN28297_c1_g1_i1	1
PPA30875	1
PPA16026	1
PPA16025	1
ppa_stranded_DN25839_c0_g1_i3	1
PPA12850	1
ppa_stranded_DN31292_c1_g2_i2	1
ppa_stranded_DN25180_c0_g1_i1	1
ppa_stranded_DN18204_c0_g1_i1	1
PPA17809	1
ppa_stranded_DN28565_c0_g2_i2	1
PPA25356	1
ppa_stranded_DN30927_c0_g3_i1	1
ppa_stranded_DN15194_c0_g1_i1	1
ppa_stranded_DN29091_c0_g1_i4	1
ppa_stranded_DN28256_c0_g2_i3	1
PPA39928	1
PPA25336	1
ppa_stranded_DN30250_c0_g2_i17	1
PPA25332	1
ppa_stranded_DN27622_c0_g1_i1	1
PPA22572	1
ppa_stranded_DN29630_c0_g1_i2	1
PPA25312	1
ppa_stranded_DN23692_c0_g1_i5	1
PPA25305	1
ppa_stranded_DN24867_c0_g1_i2	1
Iso_D.5359.1	1
Contig75-snapTAU.45	1
ppa_stranded_DN24737_c0_g1_i1	1
ppa_stranded_DN18923_c0_g1_i1	1
isototal.2303.1	1
PPA25287	1
PPA32671	1
PPA39917	1
ppa_stranded_DN25246_c0_g1_i4	1
ppa_stranded_DN32615_c0_g1_i1	1
ppa_stranded_DN16014_c0_g1_i2	1
ppa_stranded_DN20022_c0_g1_i1	1
PPA39918	1
PPA25270	1
ppa_stranded_DN35744_c0_g1_i1	1
PPA39915	1
PPA39914	1
ppa_stranded_DN25707_c0_g1_i4	1
PPA25257	1
ppa_stranded_DN15864_c0_g2_i1	1
ppa_stranded_DN30265_c3_g2_i1	1
ppa_stranded_DN29448_c0_g1_i1	1
ppa_stranded_DN27253_c0_g2_i4	1
ppa_stranded_DN26910_c0_g3_i1	1
ppa_stranded_DN27415_c0_g1_i5	1
PPA25244	1
ppa_stranded_DN27994_c1_g1_i4	1
isototal.2325.1	1
ppa_stranded_DN29513_c0_g1_i2	1
ppa_stranded_DN80_c0_g2_i1	1
ppa_stranded_DN29853_c0_g1_i1	1
seq12	1
PPA45369	1
PPA25228	1
PPA39912	1
PPA39911	1
ppa_stranded_DN26695_c0_g1_i3	1
ppa_stranded_DN28659_c0_g1_i3	1
PPA25210	1
ppa_stranded_DN24232_c0_g3_i1	1
ppa_stranded_DN18074_c0_g3_i1	1
UMM-S387-0.13-mRNA-1_frag	1
ppa_stranded_DN27816_c0_g1_i2	1
ppa_stranded_DN16773_c0_g1_i1	1
PPA39903	1
PPA40276	1
PPA40270	1
PPA25174	1
ppa_stranded_DN19421_c0_g1_i1	1
ppa_stranded_DN4683_c0_g1_i1	1
ppa_stranded_DN27313_c0_g2_i1	1
ppa_stranded_DN23344_c0_g1_i2	1
ppa_stranded_DN21777_c0_g1_i1	1
Iso_D.5476.7	1
ppa_stranded_DN8573_c0_g1_i1	1
PPA25160	1
ppa_stranded_DN31487_c1_g1_i1	1
ppa_stranded_DN25598_c0_g2_i2	1
ppa_stranded_DN29649_c0_g1_i1	1
PPA40272	1
ppa_stranded_DN20685_c0_g1_i1	1
ppa_stranded_DN23208_c0_g1_i3	1
PPA11881	1
Contig97-snapTAU.21	1
PPA11885	1
ppa_stranded_DN27957_c0_g4_i1	1
ppa_stranded_DN18125_c0_g1_i1	1
ppa_stranded_DN22183_c0_g1_i2	1
ppa_stranded_DN8717_c0_g1_i1	1
PPA34084	1
PPA32883	1
ppa_stranded_DN19377_c0_g1_i1	1
ppa_stranded_DN19230_c0_g1_i2	1
PPA08159	1
ppa_stranded_DN29952_c0_g1_i4	1
ppa_stranded_DN28585_c0_g1_i2	1
PPA08160	1
PPA08161	1
PPA39959	1
PPA39956	1
ppa_stranded_DN23556_c0_g1_i3	1
ppa_stranded_DN26350_c0_g1_i2	1
PPA08175	1
PPA08176	1
ppa_stranded_DN24065_c0_g2_i1	1
ppa_stranded_DN27379_c0_g1_i1	1
PPA39952	1
PPA08185	1
PPA39943	1
PPA39947	1
ppa_stranded_DN25755_c0_g2_i1	1
PPA39949	1
PPA34083	1
PPA14626	1
PPA16819	1
ppa_stranded_DN28750_c1_g2_i1	1
ppa_stranded_DN31432_c1_g1_i1	1
PPA39937	1
PPA08201	1
PPA08208	1
PPA08209	1
PPA08214	1
ppa_stranded_DN30655_c0_g1_i1	1
ppa_stranded_DN27759_c0_g2_i4	1
PPA39940	1
ppa_stranded_DN27630_c0_g1_i5	1
PPA08232	1
ppa_stranded_DN46054_c0_g1_i1	1
Iso_D.6160.1	1
Iso_D.6161.1	1
ppa_stranded_DN23945_c0_g2_i1	1
ppa_stranded_DN18833_c0_g2_i1	1
ppa_stranded_DN23272_c0_g1_i1	1
ppa_stranded_DN24507_c0_g1_i1	1
PPA08244	1
ppa_stranded_DN9331_c0_g2_i1	1
PPA08248	1
PPA11251	1
ppa_stranded_DN29677_c0_g1_i3	1
ppa_stranded_DN20162_c0_g3_i1	1
PPA11255	1
ppa_stranded_DN27802_c0_g1_i2	1
ppa_stranded_DN23516_c0_g2_i1	1
ppa_stranded_DN28364_c0_g2_i2	1
PPA11270	1
ppa_stranded_DN28840_c1_g2_i4	1
PPA11273	1
ppa_stranded_DN30722_c1_g1_i3	1
ppa_stranded_DN27346_c0_g1_i2	1
PPA38869	1
PPA14361	1
ppa_stranded_DN26811_c1_g1_i1	1
ppa_stranded_DN26627_c0_g1_i1	1
PPA14365	1
ppa_stranded_DN28379_c0_g2_i1	1
PPA18597	1
PPA18595	1
PPA18592	1
ppa_stranded_DN26321_c0_g1_i3	1
ppa_stranded_DN25706_c0_g1_i1	1
PPA38861	1
PPA18564	1
PPA08224	1
ppa_stranded_DN28953_c0_g2_i1	1
PPA20403	1
PPA18548	1
PPA38858	1
ppa_stranded_DN35810_c0_g1_i1	1
PPA18529	1
ppa_stranded_DN24825_c0_g1_i1	1
PPA18523	1
ppa_stranded_DN25011_c0_g1_i1	1
ppa_stranded_DN20884_c0_g2_i2	1
ppa_stranded_DN31349_c1_g4_i1	1
ppa_stranded_DN30276_c4_g2_i1	1
ppa_stranded_DN30468_c0_g1_i1	1
PPA18512	1
PPA18511	1
PPA18493	1
UMM-S245-12.34-mRNA-1_frag	1
ppa_stranded_DN28322_c0_g3_i1	1
ppa_stranded_DN10695_c0_g1_i1	1
ppa_stranded_DN25985_c0_g1_i1	1
PPA38845	1
PPA18466	1
ppa_stranded_DN19790_c0_g1_i1	1
ppa_stranded_DN40379_c0_g1_i1	1
PPA18431	1
ppa_stranded_DN26843_c1_g2_i1	1
ppa_stranded_DN26843_c2_g2_i1	1
PPA30492	1
ppa_stranded_DN27398_c2_g2_i1	1
PPA18394	1
PPA18393	1
PPA18386	1
PPA18385	1
PPA33965	1
PPA18382	1
PPA18381	1
PPA18380	1
PPA18379	1
ppa_stranded_DN26875_c0_g1_i1	1
PPA18371	1
PPA18367	1
PPA17524	1
ppa_stranded_DN25109_c0_g1_i1	1
PPA23968	1
PPA23959	1
PPA23952	1
PPA38829	1
PPA23951	1
PPA23944	1
PPA17378	1
PPA38823	1
Contig7-snapTAU.60	1
ppa_stranded_DN29559_c0_g1_i1	1
PPA23881	1
PPA23872	1
ppa_stranded_DN26877_c0_g1_i1	1
PPA23861	1
PPA23850	1
ppa_stranded_DN31399_c1_g7_i1	1
ppa_stranded_DN28243_c0_g5_i1	1
PPA23837	1
PPA23834	1
ppa_stranded_DN21146_c0_g1_i1	1
PPA06793	1
UMM-S41-3.60-mRNA-1_Frag1	1
PPA36103	1
ppa_stranded_DN24554_c0_g1_i3	1
ppa_stranded_DN29054_c0_g1_i1	1
PPA06758	1
PPA06757	1
PPA06756	1
PPA06753	1
PPA23631	1
ppa_stranded_DN28538_c0_g1_i5	1
PPA03085	1
ppa_stranded_DN31540_c0_g1_i1	1
PPA03089	1
PPA33682	1
Iso_D.5946.2	1
PPA36121	1
PPA31131	1
PPA36123	1
PPA07815	1
ppa_stranded_DN8334_c0_g1_i1	1
PPA11929	1
PPA11921	1
PPA36152	1
PPA36159	1
ppa_stranded_DN24799_c0_g4_i1	1
PPA07856	1
ppa_stranded_DN28648_c0_g1_i5	1
PPA07859	1
PPA36165	1
PPA36170	1
PPA36171	1
PPA07915	1
PPA07916	1
PPA36179	1
ppa_stranded_DN28966_c0_g1_i1	1
PPA07935	1
PPA07933	1
[truncated: 12,022 more rows]

## Sheet: Table S7 - Overrepresentation
Supplemental Table S7 – Overrepresentation results
The table shows all significantly enriched gene sets for the different coexpression modules.
Module	Gene set	-log10(adjusted P-value)	Category
1	cel03013	14.8687	KEGG
1	cel03030	13.6725	KEGG
1	cel03420	12.786	KEGG
1	cel04120	11.7117	KEGG
1	cel03440	11.3311	KEGG
1	cel03460	9.25285	KEGG
1	cel03430	7.67465	KEGG
1	cel04150	7.45954	KEGG
1	cel04070	7.13474	KEGG
1	cel03050	7.13474	KEGG
1	cel04141	6.41268	KEGG
1	cel03022	6.41268	KEGG
1	cel04310	6.41268	KEGG
1	cel04330	6.27185	KEGG
1	cel04361	6.07638	KEGG
1	cel03018	5.83745	KEGG
1	cel03410	5.63894	KEGG
1	cel04080	4.79532	KEGG
1	cel03015	4.67182	KEGG
1	cel04350	4.57981	KEGG
1	cel04144	4.34276	KEGG
1	cel00562	3.59962	KEGG
1	cel04068	3.46259	KEGG
1	cel04020	3.42673	KEGG
1	cel00563	3.0086	KEGG
2	cel03015	11.2921	KEGG
3	cel00515	4.79133	KEGG
3	cel00512	3.25826	KEGG
6	cel04350	4.92111	KEGG
6	cel04120	3.48249	KEGG
7	cel00980	39.1757	KEGG
7	cel00982	36.8666	KEGG
7	cel00480	21.8177	KEGG
7	cel00983	21.8177	KEGG
7	cel00053	19.6334	KEGG
7	cel00040	19.4513	KEGG
7	cel00830	19.098	KEGG
7	cel00860	18.508	KEGG
7	cel00590	11.5897	KEGG
9	cel03010	36.2762	KEGG
9	cel00190	21.4002	KEGG
9	cel03013	4.39803	KEGG
10	cel04140	3.28273	KEGG
11	cel03040	17.432	KEGG
11	cel03050	16.6589	KEGG
11	cel03018	5.68878	KEGG
12	cel03050	9.40779	KEGG
12	cel00280	9.40779	KEGG
12	cel00640	7.31792	KEGG
12	cel00020	6.17918	KEGG
12	cel00970	5.68536	KEGG
12	cel03040	5.67907	KEGG
12	cel00620	5.01105	KEGG
12	cel00071	3.8491	KEGG
12	cel00380	3.63339	KEGG
12	cel00310	3.32346	KEGG
14	cel00860	3.44295	KEGG
14	cel00040	3.44295	KEGG
14	cel00982	3.44295	KEGG
14	cel00980	3.44295	KEGG
14	cel00983	3.44295	KEGG
14	cel00053	3.44295	KEGG
14	cel00830	3.42029	KEGG
15	cel00980	6.89632	KEGG
15	cel00982	6.89632	KEGG
15	cel00040	6.29464	KEGG
15	cel00053	6.29464	KEGG
15	cel00860	6.29464	KEGG
15	cel00830	6.24812	KEGG
15	cel00983	5.48074	KEGG
15	cel00400	3.14477	KEGG
17	cel03008	21.8238	KEGG
22	cel02010	3.51113	KEGG
24	cel03010	63.999	KEGG
24	cel00190	4.99178	KEGG
28	cel00190	13.5011	KEGG
28	cel03010	5.41158	KEGG
42	cel00010	13.7724	KEGG
42	cel00620	10.8527	KEGG
42	cel00020	8.50645	KEGG
42	cel00280	7.77841	KEGG
42	cel00410	6.79105	KEGG
42	cel00330	6.62702	KEGG
42	cel00561	4.08804	KEGG
42	cel00071	3.93548	KEGG
42	cel00340	3.65538	KEGG
42	cel00910	3.62227	KEGG
42	cel00051	3.16377	KEGG
43	cel01040	6.41399	KEGG
44	cel04145	10.2309	KEGG
44	cel00190	10.0425	KEGG
44	cel04150	5.17396	KEGG
44	cel04142	3.36405	KEGG
45	cel04141	4.7313	KEGG
45	cel00510	4.21718	KEGG
47	cel04142	7.27572	KEGG
47	cel00600	5.73161	KEGG
47	cel00100	5.30585	KEGG
49	cel03008	3.83121	KEGG
50	cel04020	5.33745	KEGG
50	cel04010	3.43406	KEGG
53	cel04141	16.9444	KEGG
53	cel03060	4.85146	KEGG
53	cel00510	4.85146	KEGG
53	cel00513	3.05509	KEGG
1	neuropeptides	10.0971	Nervous system (Athanasouli et al. 2023)
5	NHRs	3.60859	Nervous system (Athanasouli et al. 2023)
7	NHRs	9.73308	Nervous system (Athanasouli et al. 2023)
10	NHRs	9.77138	Nervous system (Athanasouli et al. 2023)
16	GPCRs	6.46733	Nervous system (Athanasouli et al. 2023)
17	neuropeptides	5.02238	Nervous system (Athanasouli et al. 2023)
32	NHRs	5.91007	Nervous system (Athanasouli et al. 2023)
1	PF00651.33:BTB	13.4943	Pfam
1	PF04851.17:ResIII	10.1494	Pfam
1	PF00271.33:Helicase_C	9.34548	Pfam
1	PF03109.18:ABC1	9.30445	Pfam
1	PF12894.9:ANAPC4_WD40	8.12816	Pfam
1	PF14531.8:Kinase-like	7.97835	Pfam
1	PF07885.18:Ion_trans_2	7.53211	Pfam
1	PF00400.34:WD40	7.25169	Pfam
1	PF07714.19:PK_Tyr_Ser-Thr	6.90373	Pfam
1	PF00443.31:UCH	6.81338	Pfam
1	PF13423.8:UCH_1	6.59994	Pfam
1	PF13245.8:AAA_19	6.38904	Pfam
1	PF00628.31:PHD	6.18239	Pfam
1	PF00134.25:Cyclin_N	5.90807	Pfam
1	PF00917.28:MATH	5.90807	Pfam
1	PF00069.27:Pkinase	5.90807	Pfam
1	PF00520.33:Ion_trans	5.08976	Pfam
1	PF00130.24:C1_1	4.7122	Pfam
1	PF00270.31:DEAD	4.67144	Pfam
1	PF00876.20:Innexin	4.45562	Pfam
1	PF00169.31:PH	4.35466	Pfam
1	PF13637.8:Ank_4	4.35466	Pfam
1	PF00076.24:RRM_1	4.34841	Pfam
1	PF00004.31:AAA	4.31506	Pfam
1	PF00515.30:TPR_1	4.22485	Pfam
1	PF09172.13:DUF1943	4.19564	Pfam
1	PF01347.24:Vitellogenin_N	4.19564	Pfam
1	PF01399.29:PCI	4.18591	Pfam
1	PF00498.28:FHA	4.07048	Pfam
1	PF12796.9:Ank_2	4.05656	Pfam
1	PF07719.19:TPR_2	4.01442	Pfam
1	PF13857.8:Ank_5	3.98833	Pfam
1	PF13424.8:TPR_12	3.9756	Pfam
1	PF17667.3:Pkinase_fungal	3.9756	Pfam
1	PF13401.8:AAA_22	3.88744	Pfam
1	PF00023.32:Ank	3.88744	Pfam
1	PF00176.25:SNF2-rel_dom	3.82143	Pfam
1	PF13606.8:Ank_3	3.64904	Pfam
1	PF14551.8:MCM_N	3.60496	Pfam
1	PF17207.5:MCM_OB	3.60496	Pfam
1	PF17855.3:MCM_lid	3.60496	Pfam
1	PF00397.28:WW	3.53085	Pfam
1	PF13181.8:TPR_8	3.49492	Pfam
1	PF05496.14:RuvB_N	3.49079	Pfam
1	PF01363.23:FYVE	3.46771	Pfam
1	PF00066.19:Notch	3.46771	Pfam
1	PF13086.8:AAA_11	3.25873	Pfam
1	PF02214.24:BTB_2	3.24577	Pfam
1	PF12330.10:Haspin_kinase	3.11538	Pfam
1	PF14559.8:TPR_19	3.03605	Pfam
2	PF00635.28:Motile_Sperm	62.4633	Pfam
2	PF00149.30:Metallophos	29.7371	Pfam
2	PF00102.29:Y_phosphatase	24.7808	Pfam
2	PF00069.27:Pkinase	22.3335	Pfam
2	PF07714.19:PK_Tyr_Ser-Thr	18.8023	Pfam
2	PF00017.26:SH2	8.78445	Pfam
2	PF03057.16:DUF236	5.87798	Pfam
2	PF13350.8:Y_phosphatase3	4.12886	Pfam
2	PF00209.20:SNF	3.44135	Pfam
2	PF16891.7:STPPase_N	3.29884	Pfam
2	PF00782.22:DSPc	3.06023	Pfam
3	PF00100.25:Zona_pellucida	10.1279	Pfam
3	PF01079.22:Hint	10.0627	Pfam
3	PF00024.28:PAN_1	9.30748	Pfam
3	PF14625.8:Lustrin_cystein	9.10876	Pfam
3	PF01391.20:Collagen	7.93438	Pfam
3	PF02460.20:Patched	7.61841	Pfam
3	PF12349.10:Sterol-sensing	7.07669	Pfam
3	PF01681.19:C6	6.52252	Pfam
3	PF00751.20:DM	6.21355	Pfam
3	PF04870.18:Moulting_cycle	6.21355	Pfam
3	PF01484.19:Col_cuticle_N	6.06242	Pfam
3	PF00014.25:Kunitz_BPTI	5.81145	Pfam
3	PF13896.8:Glyco_transf_49	5.21171	Pfam
3	PF03407.18:Nucleotid_trans	4.55187	Pfam
3	PF01682.21:DB	4.51339	Pfam
3	PF01683.20:EB	4.34852	Pfam
3	PF00629.25:MAM	3.83683	Pfam
3	PF03062.21:MBOAT	3.60868	Pfam
3	PF00057.20:Ldl_recept_a	3.49032	Pfam
3	PF00535.28:Glycos_transf_2	3.4306	Pfam
3	PF00028.19:Cadherin	3.25118	Pfam
3	PF13850.8:ERGIC_N	3.21734	Pfam
3	PF07970.14:COPIIcoated_ERV	3.21734	Pfam
3	PF12947.9:EGF_3	3.18357	Pfam
4	PF01391.20:Collagen	43.2522	Pfam
4	PF01484.19:Col_cuticle_N	40.4101	Pfam
4	PF04155.20:Ground-like	11.5708	Pfam
4	PF01400.26:Astacin	10.9126	Pfam
4	PF01549.26:ShK	6.44237	Pfam
4	PF01682.21:DB	6.04396	Pfam
4	PF01683.20:EB	5.96607	Pfam
4	PF02363.21:C_tripleX	4.05717	Pfam
4	PF00100.25:Zona_pellucida	3.30135	Pfam
4	PF01681.19:C6	3.24701	Pfam
5	PF00069.27:Pkinase	14.5218	Pfam
5	PF07714.19:PK_Tyr_Ser-Thr	14.5218	Pfam
5	PF00059.23:Lectin_C	4.13115	Pfam
5	PF09439.12:SRPRB	3.27833	Pfam
6	PF14634.8:zf-RING_5	21.1329	Pfam
6	PF00097.27:zf-C3HC4	20.6695	Pfam
6	PF13445.8:zf-RING_UBOX	20.6284	Pfam
6	PF13639.8:zf-RING_2	20.0948	Pfam
6	PF14447.8:Prok-RING_4	17.3095	Pfam
6	PF13894.8:zf-C2H2_4	14.4181	Pfam
6	PF00096.28:zf-C2H2	14.3683	Pfam
6	PF00595.26:PDZ	14.1118	Pfam
6	PF17820.3:PDZ_6	13.484	Pfam
6	PF13920.8:zf-C3HC4_3	13.1206	Pfam
6	PF13923.8:zf-C3HC4_2	12.5671	Pfam
6	PF03931.17:Skp1_POZ	10.4046	Pfam
6	PF13465.8:zf-H2C2_2	10.1456	Pfam
6	PF01466.21:Skp1	8.05073	Pfam
6	PF12937.9:F-box-like	7.91521	Pfam
6	PF17123.7:zf-RING_11	6.49104	Pfam
6	PF13912.8:zf-C2H2_6	6.2968	Pfam
6	PF00646.35:F-box	6.24416	Pfam
6	PF03299.16:TF_AP-2	5.954	Pfam
6	PF12874.9:zf-met	5.33099	Pfam
6	PF12171.10:zf-C2H2_jaz	5.32815	Pfam
6	PF12678.9:zf-rbx1	5.15157	Pfam
6	PF00856.30:SET	5.08465	Pfam
6	PF00076.24:RRM_1	3.87335	Pfam
6	PF17120.7:Zn_ribbon_17	3.76379	Pfam
6	PF13180.8:PDZ_2	3.30516	Pfam
6	PF00250.20:Forkhead	3.30516	Pfam
6	PF00178.24:Ets	3.23087	Pfam
7	PF00067.24:p450	39.0965	Pfam
7	PF00201.20:UDPGT	25.0264	Pfam
7	PF00043.27:GST_C	23.0176	Pfam
7	PF04101.18:Glyco_tran_28_C	20.7712	Pfam
7	PF13417.8:GST_N_3	19.5097	Pfam
7	PF02798.22:GST_N	17.6783	Pfam
7	PF14497.8:GST_C_3	16.8393	Pfam
7	PF13410.8:GST_C_2	13.016	Pfam
7	PF13409.8:GST_N_2	9.20074	Pfam
7	PF13561.8:adh_short_C2	9.16104	Pfam
7	PF17172.6:GST_N_4	8.96795	Pfam
7	PF00106.27:adh_short	8.96795	Pfam
7	PF00105.20:zf-C4	8.96795	Pfam
7	PF00104.32:Hormone_recep	8.81475	Pfam
7	PF07914.13:DUF1679	8.43329	Pfam
7	PF08659.12:KR	8.12629	Pfam
7	PF02958.22:EcKL	7.68541	Pfam
7	PF17171.6:GST_C_6	6.244	Pfam
7	PF01636.25:APH	4.49201	Pfam
7	PF00135.30:COesterase	4.25703	Pfam
7	PF00248.23:Aldo_ket_red	3.14361	Pfam
7	PF00137.23:ATP-synt_C	3.01002	Pfam
7	PF05822.14:UMPH-1	3.01002	Pfam
8	PF01723.18:Chorion_1	3.5313	Pfam
8	PF06609.15:TRI12	3.07347	Pfam
8	PF01391.20:Collagen	3.07347	Pfam
10	PF00105.20:zf-C4	8.05538	Pfam
10	PF00104.32:Hormone_recep	8.05538	Pfam
11	PF01423.24:LSM	18.1239	Pfam
11	PF02996.19:Prefoldin	3.85422	Pfam
11	PF02953.17:zf-Tim10_DDP	3.6345	Pfam
12	PF00152.22:tRNA-synt_2	5.30923	Pfam
12	PF01336.27:tRNA_anti-codon	5.30923	Pfam
12	PF00364.24:Biotin_lipoyl	5.30923	Pfam
12	PF02771.18:Acyl-CoA_dh_N	4.46812	Pfam
12	PF00198.25:2-oxoacid_dh	4.25192	Pfam
12	PF00441.26:Acyl-CoA_dh_1	4.16859	Pfam
15	PF00059.23:Lectin_C	17.8357	Pfam
15	PF00431.22:CUB	8.69635	Pfam
15	PF13519.8:VWA_2	5.0904	Pfam
15	PF05473.14:UL45	5.0904	Pfam
15	PF00201.20:UDPGT	4.76304	Pfam
15	PF00092.30:VWA	3.80984	Pfam
15	PF00450.24:Peptidase_S10	3.04347	Pfam
17	PF00400.34:WD40	8.45452	Pfam
17	PF12894.9:ANAPC4_WD40	8.45452	Pfam
17	PF00271.33:Helicase_C	4.44641	Pfam
17	PF16529.7:Ge1_WD40	3.43977	Pfam
17	PF08154.14:NLE	3.38045	Pfam
17	PF00270.31:DEAD	3.0504	Pfam
17	PF04003.14:Utp12	3.0504	Pfam
21	PF02520.19:DUF148	4.34069	Pfam
23	PF01484.19:Col_cuticle_N	13.8579	Pfam
23	PF01391.20:Collagen	11.5897	Pfam
23	PF07312.13:DUF1459	5.82716	Pfam
24	PF00181.25:Ribosomal_L2	3.80793	Pfam
24	PF03947.20:Ribosomal_L2_C	3.80793	Pfam
31	PF02244.18:Propep_M14	4.89171	Pfam
31	PF00246.26:Peptidase_M14	4.48726	Pfam
31	PF07312.13:DUF1459	3.34362	Pfam
32	PF01682.21:DB	12.1416	Pfam
32	PF03314.16:DUF273	4.19022	Pfam
33	PF00435.23:Spectrin	7.39797	Pfam
33	PF00307.33:CH	3.57372	Pfam
33	PF17902.3:SH3_10	3.46424	Pfam
36	PF01400.26:Astacin	23.4259	Pfam
36	PF00188.28:CAP	7.94549	Pfam
36	PF01549.26:ShK	3.75992	Pfam
41	PF00104.32:Hormone_recep	4.42577	Pfam
41	PF00105.20:zf-C4	3.41203	Pfam
42	PF00171.24:Aldedh	4.46963	Pfam
42	PF00484.21:Pro_CA	4.35705	Pfam
43	PF08659.12:KR	5.4882	Pfam
43	PF13561.8:adh_short_C2	5.18844	Pfam
43	PF12697.9:Abhydrolase_6	5.18844	Pfam
43	PF00106.27:adh_short	5.18844	Pfam
43	PF08545.12:ACP_syn_III	4.84421	Pfam
43	PF14864.8:Alkyl_sulf_C	3.92432	Pfam
43	PF02803.20:Thiolase_C	3.87348	Pfam
43	PF02036.19:SCP2	3.87348	Pfam
43	PF00108.25:Thiolase_N	3.77881	Pfam
43	PF12831.9:FAD_oxidored	3.40767	Pfam
43	PF12146.10:Hydrolase_4	3.33527	Pfam
43	PF00890.26:FAD_binding_2	3.14958	Pfam
43	PF00155.23:Aminotran_1_2	3.07945	Pfam
45	PF04811.17:Sec23_trunk	3.43827	Pfam
45	PF00928.23:Adap_comp_sub	3.19604	Pfam
45	PF01217.22:Clat_adaptor_s	3.13859	Pfam
46	PF01391.20:Collagen	5.86457	Pfam
46	PF01484.19:Col_cuticle_N	4.94138	Pfam
46	PF17172.6:GST_N_4	3.9469	Pfam
46	PF13417.8:GST_N_3	3.53627	Pfam
46	PF10568.11:Tom37	3.09267	Pfam
47	PF04083.18:Abhydro_lipase	3.96974	Pfam
47	PF00026.25:Asp	3.96974	Pfam
47	PF12146.10:Hydrolase_4	3.20025	Pfam
47	PF00561.22:Abhydrolase_1	3.18004	Pfam
47	PF13472.8:Lipase_GDSL_2	3.02062	Pfam
49	PF00067.24:p450	9.80803	Pfam
51	PF13959.8:DUF4217	4.0222	Pfam
53	PF00059.23:Lectin_C	13.2416	Pfam
53	PF00431.22:CUB	5.67068	Pfam
56	PF00176.25:SNF2-rel_dom	6.77469	Pfam
56	PF04851.17:ResIII	4.86169	Pfam
56	PF16213.7:DCB	4.56427	Pfam
56	PF00271.33:Helicase_C	4.56427	Pfam
56	PF09324.12:DUF1981	4.56427	Pfam
56	PF07529.15:HSA	4.56427	Pfam
56	PF12783.9:Sec7_N	4.56427	Pfam
58	PF13848.8:Thioredoxin_6	7.61862	Pfam
58	PF00085.22:Thioredoxin	5.20926	Pfam
58	PF13899.8:Thioredoxin_7	5.20926	Pfam
58	PF13905.8:Thioredoxin_8	5.20926	Pfam
58	PF13098.8:Thioredoxin_2	5.04517	Pfam
58	PF04756.15:OST3_OST6	3.40509	Pfam
58	PF08534.12:Redoxin	3.40509	Pfam
58	PF00578.23:AhpC-TSA	3.17153	Pfam
59	PF01849.20:NAC	3.7299	Pfam
60	PF00118.26:Cpn60_TCP1	14.8006	Pfam
60	PF01556.20:DnaJ_C	3.98198	Pfam
1	hermaphrodite-biased	288.599	Other, Athanasouli et al. (2023)
1	Lysinibacillus	5.97379	Other, Athanasouli et al. (2023)
1	novosphingobium	4.72578	Other, Athanasouli et al. (2023)
2	male-biased	Inf	Other, Athanasouli et al. (2023)
2	C.albidus	202.99	Other, Athanasouli et al. (2023)
2	Lysinibacillus	13.7084	Other, Athanasouli et al. (2023)
3	oscillating	269.833	Other, Athanasouli et al. (2023)
3	novosphingobium	21.7715	Other, Athanasouli et al. (2023)
3	Lysinibacillus	8.77761	Other, Athanasouli et al. (2023)
3	2yeast	4.73939	Other, Athanasouli et al. (2023)
3	intestine	4.62554	Other, Athanasouli et al. (2023)
4	oscillating	111.638	Other, Athanasouli et al. (2023)
4	novosphingobium	22.0145	Other, Athanasouli et al. (2023)
4	Lysinibacillus	21.6705	Other, Athanasouli et al. (2023)
5	intestine	18.6185	Other, Athanasouli et al. (2023)
5	C.curvatus	9.46206	Other, Athanasouli et al. (2023)
5	novosphingobium	6.49711	Other, Athanasouli et al. (2023)
5	K12	5.38025	Other, Athanasouli et al. (2023)
5	C.albidus	5.09782	Other, Athanasouli et al. (2023)
5	2yeast	4.27647	Other, Athanasouli et al. (2023)
6	C.albidus	241.055	Other, Athanasouli et al. (2023)
6	intestine	14.8959	Other, Athanasouli et al. (2023)
6	2yeast	9.58142	Other, Athanasouli et al. (2023)
7	C.curvatus	19.9489	Other, Athanasouli et al. (2023)
7	C.albidus	14.7665	Other, Athanasouli et al. (2023)
7	male-biased	8.55399	Other, Athanasouli et al. (2023)
7	2yeast	6.25945	Other, Athanasouli et al. (2023)
7	novosphingobium	4.40317	Other, Athanasouli et al. (2023)
8	oscillating	54.8696	Other, Athanasouli et al. (2023)
8	novosphingobium	17.8047	Other, Athanasouli et al. (2023)
8	C.albidus	12.9437	Other, Athanasouli et al. (2023)
8	2yeast	11.0769	Other, Athanasouli et al. (2023)
8	C.curvatus	8.03464	Other, Athanasouli et al. (2023)
9	hermaphrodite-biased	26.3754	Other, Athanasouli et al. (2023)
10	novosphingobium	32.2809	Other, Athanasouli et al. (2023)
10	C.albidus	17.6241	Other, Athanasouli et al. (2023)
10	2yeast	9.2939	Other, Athanasouli et al. (2023)
10	C.curvatus	5.76923	Other, Athanasouli et al. (2023)
10	male-biased	5.71708	Other, Athanasouli et al. (2023)
11	hermaphrodite-biased	12.7887	Other, Athanasouli et al. (2023)
12	Lysinibacillus	7.60883	Other, Athanasouli et al. (2023)
12	hermaphrodite-biased	7.49233	Other, Athanasouli et al. (2023)
13	C.curvatus	3.30849	Other, Athanasouli et al. (2023)
14	K12	36.1757	Other, Athanasouli et al. (2023)
14	C.curvatus	10.019	Other, Athanasouli et al. (2023)
14	2yeast	5.4403	Other, Athanasouli et al. (2023)
14	novosphingobium	4.71445	Other, Athanasouli et al. (2023)
14	intestine	3.96055	Other, Athanasouli et al. (2023)
15	novosphingobium	9.79748	Other, Athanasouli et al. (2023)
15	C.albidus	5.65093	Other, Athanasouli et al. (2023)
15	K12	4.3747	Other, Athanasouli et al. (2023)
15	male-biased	3.64891	Other, Athanasouli et al. (2023)
15	2yeast	3.47359	Other, Athanasouli et al. (2023)
17	hermaphrodite-biased	31.314	Other, Athanasouli et al. (2023)
19	male-biased	6.1148	Other, Athanasouli et al. (2023)
19	2yeast	6.1148	Other, Athanasouli et al. (2023)
19	C.albidus	5.95862	Other, Athanasouli et al. (2023)
21	C.curvatus	8.2151	Other, Athanasouli et al. (2023)
21	2yeast	5.31822	Other, Athanasouli et al. (2023)
21	C.albidus	4.96372	Other, Athanasouli et al. (2023)
22	novosphingobium	28.0185	Other, Athanasouli et al. (2023)
22	C.curvatus	12.8314	Other, Athanasouli et al. (2023)
22	hermaphrodite-biased	11.1268	Other, Athanasouli et al. (2023)
22	K12	9.82616	Other, Athanasouli et al. (2023)
23	oscillating	24.9269	Other, Athanasouli et al. (2023)
23	2yeast	21.6133	Other, Athanasouli et al. (2023)
23	novosphingobium	11.1602	Other, Athanasouli et al. (2023)
23	C.albidus	6.84146	Other, Athanasouli et al. (2023)
23	Lysinibacillus	5.05436	Other, Athanasouli et al. (2023)
23	C.curvatus	3.52127	Other, Athanasouli et al. (2023)
24	hermaphrodite-biased	25.5146	Other, Athanasouli et al. (2023)
24	Lysinibacillus	3.51836	Other, Athanasouli et al. (2023)
24	novosphingobium	3.03214	Other, Athanasouli et al. (2023)
25	hermaphrodite-biased	12.4725	Other, Athanasouli et al. (2023)
26	novosphingobium	15.2988	Other, Athanasouli et al. (2023)
28	Lysinibacillus	4.26699	Other, Athanasouli et al. (2023)
28	hermaphrodite-biased	3.51366	Other, Athanasouli et al. (2023)
30	2yeast	7.72658	Other, Athanasouli et al. (2023)
30	oscillating	7.2146	Other, Athanasouli et al. (2023)
30	C.curvatus	3.58887	Other, Athanasouli et al. (2023)
31	oscillating	11.6128	Other, Athanasouli et al. (2023)
32	K12	7.40018	Other, Athanasouli et al. (2023)
34	C.albidus	3.22466	Other, Athanasouli et al. (2023)
36	2yeast	26.2696	Other, Athanasouli et al. (2023)
36	C.curvatus	18.1306	Other, Athanasouli et al. (2023)
36	C.albidus	4.23522	Other, Athanasouli et al. (2023)
37	hermaphrodite-biased	5.92143	Other, Athanasouli et al. (2023)
38	hermaphrodite-biased	7.17162	Other, Athanasouli et al. (2023)
39	novosphingobium	3.63387	Other, Athanasouli et al. (2023)
39	C.curvatus	3.54242	Other, Athanasouli et al. (2023)
41	C.curvatus	5.05955	Other, Athanasouli et al. (2023)
41	novosphingobium	3.88375	Other, Athanasouli et al. (2023)
41	male-biased	3.4434	Other, Athanasouli et al. (2023)
42	novosphingobium	12.2562	Other, Athanasouli et al. (2023)
42	C.curvatus	9.84343	Other, Athanasouli et al. (2023)
43	novosphingobium	6.85707	Other, Athanasouli et al. (2023)
43	hermaphrodite-biased	6.78129	Other, Athanasouli et al. (2023)
43	C.curvatus	3.6216	Other, Athanasouli et al. (2023)
44	C.albidus	5.15176	Other, Athanasouli et al. (2023)
44	hermaphrodite-biased	5.15176	Other, Athanasouli et al. (2023)
46	oscillating	12.3291	Other, Athanasouli et al. (2023)
47	novosphingobium	11.9019	Other, Athanasouli et al. (2023)
47	2yeast	7.89037	Other, Athanasouli et al. (2023)
47	C.albidus	4.67807	Other, Athanasouli et al. (2023)
47	K12	3.68437	Other, Athanasouli et al. (2023)
48	male-biased	21.8202	Other, Athanasouli et al. (2023)
49	C.albidus	3.83154	Other, Athanasouli et al. (2023)
51	hermaphrodite-biased	11.5191	Other, Athanasouli et al. (2023)
53	K12	3.32866	Other, Athanasouli et al. (2023)
55	novosphingobium	6.48334	Other, Athanasouli et al. (2023)
55	2yeast	4.23866	Other, Athanasouli et al. (2023)
56	Lysinibacillus	3.92609	Other, Athanasouli et al. (2023)
59	hermaphrodite-biased	7.81313	Other, Athanasouli et al. (2023)
60	hermaphrodite-biased	10.8626	Other, Athanasouli et al. (2023)
1	P6	164.368	spatial transcriptome
1	P8	150.396	spatial transcriptome
1	P7	41.3298	spatial transcriptome
1	P2	20.9331	spatial transcriptome
2	P9	Inf	spatial transcriptome
2	P5	Inf	spatial transcriptome
5	P4	6.68969	spatial transcriptome
5	P3	6.68969	spatial transcriptome
8	P2	13.4506	spatial transcriptome
8	P11	12.4548	spatial transcriptome
8	P1	4.99637	spatial transcriptome
8	P3	3.96182	spatial transcriptome
9	P7	16.2448	spatial transcriptome
9	P1	6.125	spatial transcriptome
9	P8	3.2987	spatial transcriptome
10	P2	7.33461	spatial transcriptome
11	P6	5.59791	spatial transcriptome
14	P4	7.41476	spatial transcriptome
14	P10	3.04704	spatial transcriptome
14	P3	3.04704	spatial transcriptome
15	P4	5.60226	spatial transcriptome
17	P7	10.3676	spatial transcriptome
17	P8	5.99897	spatial transcriptome
18	P2	8.06125	spatial transcriptome
18	P3	4.00684	spatial transcriptome
21	P11	4.22009	spatial transcriptome
21	P4	3.03313	spatial transcriptome
23	P7	16.6262	spatial transcriptome
24	P6	11.595	spatial transcriptome
24	P8	3.22127	spatial transcriptome
29	P1	4.77167	spatial transcriptome
32	P2	7.22839	spatial transcriptome
33	P6	3.97916	spatial transcriptome
33	P8	3.3714	spatial transcriptome
36	P4	3.37806	spatial transcriptome
36	P3	3.37806	spatial transcriptome
37	P2	10.249	spatial transcriptome
37	P11	9.38531	spatial transcriptome
39	P4	5.40399	spatial transcriptome
39	P3	3.23968	spatial transcriptome
40	P11	15.689	spatial transcriptome
41	P4	6.13906	spatial transcriptome
48	P11	3.42029	spatial transcriptome
51	P7	8.49165	spatial transcriptome
51	P8	4.21989	spatial transcriptome
51	P6	3.07401	spatial transcriptome

## Sheet: Table S8 - Module labels
Supplemental Table S8 – Module labels
The table shows the coexpression modules together with the assigned biological labels.
Module	Name
1	OOGEN_1
2	SPERM_2
3	GUT_3
4	CUTCL_4
5	GUT_5
6	GUT_6
7	XENBIO_7
8	CUTCL_8
9	HERMPH_9
10	NHR_10
11	HERMPH_11
12	TCA_12
13	LRB7_13
14	GUT_14
15	XENBIO_15
16	GPCR_16
17	HERMPH_17
18	HEAD_18
19	MALE_19
20	UNKNOW_20
21	GUT_21
22	ABC_22
23	OSCI_23
24	HERMPH_24
25	HERMPH_25
26	UNKNOW_26
27	LRB111_27
28	HERMPH_28
29	HEAD_29
30	OSCI_30
31	OSCI_31
32	HEAD_32
33	GONAD_33
34	LRB63_34
35	LRB63_35
36	GLAND_36
37	HERMPH_37
38	HERMPH_38
39	GUT_39
40	TAIL_40
41	GUT_41
42	METABO_42
43	FAT_43
44	PHAGO_44
45	GLYCAN_45
46	OSCI_46
47	FAT_47
48	TAIL_48
49	P450_49
50	MAPK_50
51	HERMPH_51
52	UNKNOW_52
53	XENBIO_53
54	UNKNOW_54
55	COMAMO_55
56	HELIC_56
57	UNKNOW_57
58	THIRDX_58
59	HERMPH_59
60	HERMPH_60

## Sheet: Table S9 - Bipartite interactio
Supplemental Table S9 – Bipartite interactions
The table shows all predicted interactions between the bacterial metabolic pathway groups and nematode coexpression modules..
Module	MPG	Median expression fold change (present/absent)	adjusted p-value
1	L-arginine degradation IX (arginine:pyruvate transaminase pathway), pyoverdine I biosynthesis, 4-aminobutanoate degradation IV, polyhydroxydecanoate biosynthesis, N-acetylglutaminylglutamine amide biosynthesis, phosphatidate biosynthesis (yeast), anhydromuropeptides recycling II	1.28675	3.94913e-226
1	dimethylsulfoniopropanoate degradation I (cleavage)	1.348	3.44419e-166
1	L-lysine degradation V	1.243	1.08692e-127
1	anandamide degradation	1.28361	4.98514e-106
1	uracil degradation I (reductive), thymine degradation	1.2256	4.77506e-101
1	UDP-N-acetyl-&alpha;-D-fucosamine biosynthesis	1.24432	3.55346e-92
1	D-glucarate degradation II	1.11381	4.02624e-87
1	polyhydroxybutanoate biosynthesis	1.11185	2.07861e-76
1	L-arginine degradation X (arginine monooxygenase pathway)	1.2569	2.1467e-67
1	gramicidin S biosynthesis, massetolide A biosynthesis, viscosin biosynthesis	1.2569	2.1467e-67
1	CDP-4-dehydro-3,6-dideoxy-D-glucose biosynthesis	1.2569	2.1467e-67
1	L-proline biosynthesis II (from arginine)	1.2569	2.1467e-67
1	linuron degradation	1.28358	1.36023e-63
1	UDP-N-acetyl-&alpha;-D-quinovosamine biosynthesis	1.22745	1.69775e-61
1	guanosine nucleotides degradation III	1.15273	1.67104e-60
1	phosphatidylethanolamine biosynthesis III, cob(II)yrinate a,c-diamide biosynthesis II (late cobalt incorporation), phosphatidylserine biosynthesis II	1.24366	6.89902e-59
1	beta-alanine degradation III	1.23444	2.66128e-54
1	L-lysine degradation IV	1.22458	3.75796e-52
1	alginate biosynthesis I (algal)	1.24843	9.4469e-48
1	shikimate degradation II	1.24843	9.4469e-48
1	androstenedione degradation I (aerobic)	1.23807	2.31405e-43
1	phenylethanol degradation	1.23402	1.32076e-42
1	C4 photosynthetic carbon assimilation cycle, PEPCK type	1.19087	1.54518e-40
1	L-arginine degradation IV (arginine decarboxylase/agmatine deiminase pathway), putrescine biosynthesis II	1.17162	1.9801e-40
1	glycine betaine degradation I	1.2335	3.8767e-35
1	adenosylcobinamide-GDP biosynthesis from cobyrinate a,c-diamide	1.16728	8.54087e-30
1	guanosine nucleotides degradation II	1.12707	2.2499e-26
1	GDP-D-rhamnose biosynthesis	1.14204	6.45996e-23
1	glyphosate degradation I	1.18293	1.92556e-22
1	oxalate degradation III	1.19155	4.9742e-17
1	beta-alanine degradation I, taurine degradation I, hypotaurine degradation	1.14272	5.28781e-17
1	cytochrome c biogenesis (system III type)	1.13305	2.14278e-15
1	L-ornithine degradation I (L-proline biosynthesis), aerobic respiration I (cytochrome c), aerobic respiration II (cytochrome c) (yeast)	1.2136	2.88849e-15
1	glycolate and glyoxylate degradation I	1.12638	5.72854e-15
1	Entner-Doudoroff shunt	1.08414	8.99984e-14
1	methylamine degradation II	1.20629	1.41228e-09
1	glycogen degradation II	1.09903	8.19155e-08
1	dibenzothiophene desulfurization	1.15749	3.06846e-07
1	taurine degradation III	1.1318	1.32416e-06
1	UDP-N-acetyl-D-glucosamine biosynthesis II	1.18344	1.89323e-05
1	L-arginine degradation XII	1.11009	0.000831051
1	D-galactarate degradation II	1.10254	0.00087903
1	mycothiol oxidation	1.18855	0.00102226
1	L-lysine degradation X	1.1381	0.00124043
1	putrescine degradation I	1.1381	0.00124043
1	malonate decarboxylase activation	1.09341	0.032488
2	beta-alanine degradation III	3.62852	0
2	glycine betaine degradation I	3.4216	0
2	L-lyxonate degradation	3.76584	0
2	shikimate degradation II	3.51184	0
2	L-methionine biosynthesis IV	0.257865	0
2	ethanol degradation IV	0.269821	0
2	alginate biosynthesis I (algal)	3.51184	0
2	linuron degradation	3.9313	0
2	L-ornithine degradation I (L-proline biosynthesis), aerobic respiration I (cytochrome c), aerobic respiration II (cytochrome c) (yeast)	3.90598	0
2	(5Z)-dodecenoate biosynthesis II	3.558	0
2	phosphatidylethanolamine biosynthesis III, cob(II)yrinate a,c-diamide biosynthesis II (late cobalt incorporation), phosphatidylserine biosynthesis II	4.39336	0
2	atrazine degradation I (aerobic)	4.16211	0
2	mycothiol oxidation	3.728	0
2	anandamide degradation	3.55638	1.37103e-305
2	adenosylcobinamide-GDP biosynthesis from cobyrinate a,c-diamide	3.22815	7.57692e-234
2	yersiniabactin biosynthesis	0.303691	8.93675e-207
2	alkylnitronates degradation	2.97406	2.83553e-129
2	GDP-D-rhamnose biosynthesis	3.00121	3.90558e-128
2	androstenedione degradation I (aerobic)	3.87915	8.8985e-108
2	cytochrome c biogenesis (system III type)	2.97459	1.85703e-42
2	(-)-dehydrodiconiferyl alcohol degradation	3.78289	7.88258e-35
2	uracil degradation I (reductive), thymine degradation	3.32688	4.00816e-31
2	polyhydroxybutanoate biosynthesis	2.92945	1.53446e-21
2	catechol degradation to 2-hydroxypentadienoate I, catechol degradation to 2-hydroxypentadienoate II, 3-chlorocatechol degradation III (meta pathway)	4.12737	9.80288e-14
2	UDP-2,3-diacetamido-2,3-dideoxy-&alpha;-D-mannuronate biosynthesis	4.35843	1.84411e-13
2	nylon-6 oligomer degradation, sulfide oxidation II (flavocytochrome c), sulfite oxidation I, thiosulfate oxidation III (multienzyme complex), diethylphosphate degradation, 4-ethylphenol degradation (anaerobic), testosterone and androsterone degradation to androstendione (aerobic), 4-methylphenol degradation to protocatechuate, terephthalate degradation, toluene degradation to 2-hydroxypentadienoa…	4.35843	1.84411e-13
2	glycolate and glyoxylate degradation I	2.89452	3.0134e-12
2	L-arginine degradation IV (arginine decarboxylase/agmatine deiminase pathway), putrescine biosynthesis II	3.19401	5.35964e-05
3	L-arginine degradation IV (arginine decarboxylase/agmatine deiminase pathway), putrescine biosynthesis II	0.301847	0
3	yersiniabactin biosynthesis	2.76988	5.62862e-295
3	linuron degradation	0.156419	3.32771e-260
3	anandamide degradation	0.23013	3.72022e-254
3	L-lyxonate degradation	0.254973	3.38845e-244
3	atrazine degradation I (aerobic)	0.183344	1.20292e-226
3	catechol degradation to 2-hydroxypentadienoate I, catechol degradation to 2-hydroxypentadienoate II, 3-chlorocatechol degradation III (meta pathway)	0.16875	2.441e-203
3	guanine and guanosine salvage	2.12459	6.51677e-173
3	oxalate degradation III	0.314188	6.8781e-151
3	phosphatidylethanolamine biosynthesis III, cob(II)yrinate a,c-diamide biosynthesis II (late cobalt incorporation), phosphatidylserine biosynthesis II	0.238328	5.10349e-142
3	xylitol degradation	1.6033	3.98708e-130
3	dimethylsulfoniopropanoate degradation I (cleavage)	0.169674	1.169e-127
3	L-malate degradation I	2.35936	1.07e-110
3	D-galactonate degradation	1.62431	6.18015e-101
3	L-ornithine degradation I (L-proline biosynthesis), aerobic respiration I (cytochrome c), aerobic respiration II (cytochrome c) (yeast)	0.26547	1.62582e-99
3	D-lactate to cytochrome bo oxidase electron transfer, methylglyoxal degradation I	2.33599	1.75393e-99
3	UDP-N-acetyl-&alpha;-D-fucosamine biosynthesis	0.251868	8.75958e-80
3	L-phenylalanine degradation I (aerobic), L-tyrosine biosynthesis IV	0.298075	4.58008e-74
3	mycothiol oxidation	0.31337	5.75604e-64
3	L-arginine degradation IX (arginine:pyruvate transaminase pathway), pyoverdine I biosynthesis, 4-aminobutanoate degradation IV, polyhydroxydecanoate biosynthesis, N-acetylglutaminylglutamine amide biosynthesis, phosphatidate biosynthesis (yeast), anhydromuropeptides recycling II	0.216284	1.1088e-59
3	L-histidine degradation I	1.58629	9.82804e-55
3	glutaryl-CoA degradation	0.704188	3.06281e-54
3	(5Z)-dodecenoate biosynthesis II	0.428551	6.04833e-52
3	L-methionine biosynthesis IV	2.18885	1.85846e-39
3	nitrobenzene degradation II	1.46613	7.73081e-37
3	2-hydroxypenta-2,4-dienoate degradation	0.313533	4.71519e-34
3	gallate degradation I	0.256606	6.66353e-31
3	5-oxo-L-proline metabolism	1.47202	3.46859e-26
3	UDP-2,3-diacetamido-2,3-dideoxy-&alpha;-D-mannuronate biosynthesis	0.178128	2.08618e-25
3	nylon-6 oligomer degradation, sulfide oxidation II (flavocytochrome c), sulfite oxidation I, thiosulfate oxidation III (multienzyme complex), diethylphosphate degradation, 4-ethylphenol degradation (anaerobic), testosterone and androsterone degradation to androstendione (aerobic), 4-methylphenol degradation to protocatechuate, terephthalate degradation, toluene degradation to 2-hydroxypentadienoa…	0.178128	2.08618e-25
3	L-threonate degradation	1.52739	5.26597e-23
3	glycerol degradation II	1.24659	2.03555e-22
3	2-chloroacrylate degradation I	1.73064	1.22357e-21
3	NAD salvage (plants)	1.68851	1.32643e-20
3	2-oxoisovalerate decarboxylation to isobutanoyl-CoA	0.4776	1.72761e-19
3	phenylethanol degradation	0.19258	3.74765e-19
3	L-tryptophan degradation X (mammalian, via tryptamine)	1.35151	4.5652e-19
3	S-methyl-5'-thioadenosine degradation IV	2.64942	8.914e-18
3	pyruvate fermentation to (S)-acetoin	1.55189	3.69527e-17
3	dTDP-beta-L-rhamnose biosynthesis	0.543469	1.75262e-15
3	myo-inositol degradation I	1.59111	3.56257e-15
3	tRNA-uridine 2-thiolation and selenation (bacteria)	1.31906	7.19072e-12
3	GDP-D-rhamnose biosynthesis	0.488163	1.61046e-11
3	sucrose degradation V (sucrose &alpha;-glucosidase)	1.64932	1.93381e-11
3	uracil degradation I (reductive), thymine degradation	0.314939	3.37719e-10
3	glyphosate degradation III	1.42276	3.72822e-10
3	glucose and glucose-1-phosphate degradation	1.38889	5.1181e-09
3	S-methyl-5'-thioadenosine degradation I, 5'-deoxyadenosine degradation II	1.38889	5.1181e-09
3	2,3-dihydroxybenzoate biosynthesis	1.43691	4.60835e-08
3	tRNA splicing I	0.2407	7.10808e-08
3	1-chloro-2-nitrobenzene degradation	1.40216	3.92842e-07
3	4-oxopentanoate degradation	0.169769	4.30475e-07
3	sulfoquinovose degradation II	0.169769	4.30475e-07
3	dimethylsulfoniopropanoate degradation II (cleavage), manganese oxidation II, L-phenylalanine degradation V	0.169769	4.30475e-07
3	glycolate and glyoxylate degradation II, arsenate reduction (respiratory)	0.169769	4.30475e-07
3	pyruvate fermentation to ethanol II, pyruvate fermentation to acetate VIII, acetaldehyde biosynthesis II, butanol and isobutanol biosynthesis (engineered)	1.1579	1.25028e-06
3	glucosylglycerol biosynthesis, trehalose biosynthesis II, NAD salvage pathway I (PNC VI cycle), trehalose biosynthesis I	1.2915	1.91222e-06
3	cytochrome c biogenesis (system III type)	0.683138	3.42697e-06
3	chlorosalicylate degradation, salicylate degradation I, methylsalicylate degradation	1.67271	3.91646e-06
3	heterolactic fermentation	1.44305	4.52035e-06
3	assimilatory sulfate reduction III	1.36188	7.25926e-06
3	anthranilate degradation IV (aerobic)	1.46219	1.5038e-05
3	L-valine degradation II, L-leucine degradation III, L-isoleucine degradation II, indole-3-acetate biosynthesis VI (bacteria)	1.38591	2.42292e-05
3	cellulose biosynthesis	1.53022	4.12798e-05
3	GDP-6-deoxy-D-talose biosynthesis	0.606951	4.5831e-05
3	L-isoleucine degradation I	0.712936	0.000102292
3	2-O-&alpha;-mannosyl-D-glycerate degradation	1.47331	0.000331057
3	thiazole component of thiamine diphosphate biosynthesis II	0.275429	0.00050703
3	dTDP-4-O-demethyl-beta-L-noviose biosynthesis	0.275429	0.00050703
3	spermidine biosynthesis III, D-cycloserine biosynthesis	0.275429	0.00050703
3	GDP-D-perosamine biosynthesis	0.275429	0.00050703
3	propanoate fermentation to 2-methylbutanoate	0.693672	0.000550721
3	sulfide oxidation I (to sulfur globules)	0.340266	0.000925986
3	volatile esters biosynthesis (during fruit ripening)	0.71373	0.00112287
3	UDP-N-acetyl-&alpha;-D-quinovosamine biosynthesis	0.314883	0.00114842
3	D-fructuronate degradation	1.42767	0.00121041
3	gamma-resorcylate degradation II	1.33724	0.0020694
3	rhizobactin 1021 biosynthesis	1.29838	0.0024788
3	8-oxo-(d)GTP detoxification I	1.2848	0.00324
3	alginate biosynthesis I (algal)	0.318588	0.00345321
3	shikimate degradation II	0.318588	0.00345321
3	serine racemization	0.804083	0.00435832
3	pentose phosphate pathway (oxidative branch) I	1.59614	0.021434
3	Entner-Doudoroff shunt	0.679393	0.024558
3	androstenedione degradation I (aerobic)	0.156853	2.55165700001298e-313
4	gallate degradation I	0.325362	0
4	2-hydroxypenta-2,4-dienoate degradation	0.389748	1.95837e-298
4	linuron degradation	0.212819	4.92883e-185
4	androstenedione degradation I (aerobic)	0.225803	6.09973e-183
4	phenylethanol degradation	0.262144	2.60362e-175
4	catechol degradation to 2-hydroxypentadienoate I, catechol degradation to 2-hydroxypentadienoate II, 3-chlorocatechol degradation III (meta pathway)	0.248784	4.19245e-157
4	dimethylsulfoniopropanoate degradation I (cleavage)	0.211081	7.43166e-138
4	L-lysine degradation I	0.375863	1.3592e-106
4	taurine degradation IV	0.663868	1.73568e-83
4	1,2-propanediol biosynthesis from lactate (engineered)	0.384684	4.88583e-57
4	glycine betaine biosynthesis I (Gram-negative bacteria), choline degradation I, isethionate degradation, choline degradation II	0.700329	3.16881e-35
4	D-xylose degradation I	1.64521	1.61404e-33
4	xylitol degradation	1.50954	1.17822e-32
4	assimilatory sulfate reduction III	1.73474	2.84726e-32
4	melibiose degradation	1.51739	3.84084e-32
4	glyphosate degradation III	1.51075	3.43957e-29
4	L-isoleucine degradation I	0.727995	4.41146e-27
4	sulfate activation for sulfonation	0.62549	9.90943e-24
4	autoinducer AI-1 biosynthesis	1.81839	5.96801e-21
4	dimethylsulfoniopropanoate degradation II (cleavage), manganese oxidation II, L-phenylalanine degradation V	0.234675	1.31125e-19
4	sulfoquinovose degradation II	0.234675	1.31125e-19
4	4-oxopentanoate degradation	0.234675	1.31125e-19
4	glycolate and glyoxylate degradation II, arsenate reduction (respiratory)	0.234675	1.31125e-19
4	atrazine degradation I (aerobic)	0.304542	3.27815e-19
4	4-amino-2-methyl-5-diphosphomethylpyrimidine biosynthesis I	1.60748	1.81964e-17
4	hydroxymethylpyrimidine salvage	1.60748	1.81964e-17
4	sucrose degradation V (sucrose &alpha;-glucosidase)	1.60803	3.05639e-17
4	propanoate fermentation to 2-methylbutanoate	0.693176	4.84561e-17
4	vanillin and vanillate degradation II	0.717078	2.24361e-16
4	myo-inositol degradation I	1.45306	1.19105e-15
4	cellulose biosynthesis	1.43171	5.78946e-15
4	adenosylcobinamide-GDP salvage from cobinamide I	1.20413	6.56723e-15
4	UDP-2,3-diacetamido-2,3-dideoxy-&alpha;-D-mannuronate biosynthesis	0.262911	1.5112e-14
4	nylon-6 oligomer degradation, sulfide oxidation II (flavocytochrome c), sulfite oxidation I, thiosulfate oxidation III (multienzyme complex), diethylphosphate degradation, 4-ethylphenol degradation (anaerobic), testosterone and androsterone degradation to androstendione (aerobic), 4-methylphenol degradation to protocatechuate, terephthalate degradation, toluene degradation to 2-hydroxypentadienoa…	0.262911	1.5112e-14
4	4-hydroxybenzoate biosynthesis III (plants), 4-coumarate degradation (anaerobic), 4-coumarate degradation (aerobic)	0.415499	2.51382e-13
4	catechol degradation to beta-ketoadipate, 4-chlorocatechol degradation	0.711299	6.27378e-13
4	4-methylcatechol degradation (ortho cleavage)	0.711299	6.27378e-13
4	GDP-6-deoxy-D-talose biosynthesis	0.566915	7.36032e-13
4	oxalate degradation III	0.638	3.56338e-12
4	dTDP-beta-L-rhamnose biosynthesis	0.646201	1.58645e-11
4	sucrose degradation III (sucrose invertase)	1.53678	1.28227e-10
4	gallate degradation II	0.287433	2.77926e-09
4	L-carnitine degradation III	0.774399	2.0904e-08
4	Entner-Doudoroff shunt	0.714262	1.34277e-05
4	D-galactonate degradation	1.33425	1.73889e-05
4	ornithine lipid biosynthesis	1.33474	2.93328e-05
4	D-glucarate degradation II	0.69831	0.000158215
4	urea degradation II	0.735783	0.000543716
4	L-asparagine degradation I	0.607973	0.00104654
4	glutathione biosynthesis	0.565135	0.00112344
4	L-glutamate biosynthesis II, L-glutamate degradation X	0.565135	0.00112344
4	L-ornithine biosynthesis II	0.565135	0.00112344
4	NAD(P)/NADPH interconversion, L-serine biosynthesis I	0.565135	0.00112344
4	volatile esters biosynthesis (during fruit ripening)	0.696245	0.0068794
4	2-amino-3-hydroxycyclopent-2-enone biosynthesis	1.78704	0.00911392
4	lactose degradation II	1.68446	0.0136942
4	nitroethane degradation	0.674694	0.0177015
4	L-lysine biosynthesis III	0.841315	0.0195799
5	L-tryptophan degradation to 2-amino-3-carboxymuconate semialdehyde	2.93854	1.24448e-272
5	hentriaconta-3,6,9,12,15,19,22,25,28-nonaene biosynthesis, Kdo transfer to lipid IVA II (Haemophilus), cis-alkene biosynthesis, UDP-N-acetylmuramoyl-pentapeptide biosynthesis III (meso-diaminopimelate containing)	3.28849	6.05079e-172
5	NADH to cytochrome bo oxidase electron transfer II, NADH to cytochrome bd oxidase electron transfer II	0.249255	6.05079e-172
5	L-isoleucine biosynthesis I (from threonine)	0.249255	6.05079e-172
5	mitochondrial NADPH production (yeast)	0.249255	6.05079e-172
5	L-arginine biosynthesis III (via N-acetyl-L-citrulline)	3.28849	6.05079e-172
5	L-ornithine biosynthesis I	0.249255	6.05079e-172
5	L-arginine degradation VI (arginase 2 pathway)	3.28849	6.05079e-172
5	ascorbate recycling (cytosolic)	0.670417	3.76551e-50
5	formate oxidation to CO2	0.677337	3.7326e-49
5	putrescine degradation I	0.353417	1.25996e-47
5	L-lysine degradation X	0.353417	1.25996e-47
5	phosphopantothenate biosynthesis III (archaea)	0.690944	8.23183e-47
5	phosphopantothenate biosynthesis I	0.690944	8.23183e-47
5	glycogen degradation I	0.687704	1.21231e-41
5	TCA cycle VI (Helicobacter)	1.62006	3.24949e-40
5	C4 photosynthetic carbon assimilation cycle, PEPCK type	0.637314	1.54302e-39
5	glycogen degradation II	0.681387	5.54972e-38
5	seleno-amino acid detoxification and volatilization III	0.68947	2.30305e-33
5	guanosine nucleotides degradation III	0.667325	1.0866e-32
5	UDP-N-acetyl-D-glucosamine biosynthesis II	0.660062	2.47462e-31
5	D-galactarate degradation II	0.679285	5.88502e-28
5	L-lysine biosynthesis VI	0.728495	7.99718e-28
5	L-arabinose degradation III, L-arabinose degradation IV	0.628029	2.67468e-27
5	guanosine nucleotides degradation II	0.695111	6.69545e-27
5	tetrapyrrole biosynthesis II (from glycine)	0.757925	7.65899e-27
5	phosphatidylcholine biosynthesis VI	0.660839	9.1276e-27
5	3-oxoadipate degradation	0.751445	7.77073e-25
5	adenosine nucleotides degradation II	0.738439	1.91354e-24
5	inosine 5'-phosphate degradation	0.738439	1.91354e-24
5	glyphosate degradation I	0.6754	2.78321e-24
5	NAD salvage pathway II (PNC IV cycle)	0.750604	2.94742e-24
5	glycolate and glyoxylate degradation I	0.700435	3.64842e-23
5	CDP-diacylglycerol biosynthesis III	0.771707	5.52095e-23
5	adenine and adenosine salvage I	0.771707	5.52095e-23
5	L-cysteine degradation III	0.771707	5.52095e-23
5	5-(methoxycarbonylmethoxy)uridine biosynthesis, CDP-diacylglycerol biosynthesis I	0.771707	5.52095e-23
5	xanthine and xanthosine salvage	0.771707	5.52095e-23
5	NADH:menaquinone6 oxidoreductase	0.396991	6.64617e-23
5	L-tyrosine biosynthesis I	0.493279	1.99847e-22
5	NAD salvage pathway V (PNC V cycle)	1.34195	2.7543e-22
5	nitrate reduction VIIIb (dissimilatory)	1.30004	4.89675e-22
5	L-proline biosynthesis II (from arginine)	0.617032	3.53909e-21
5	L-arginine degradation X (arginine monooxygenase pathway)	0.617032	3.53909e-21
5	CDP-4-dehydro-3,6-dideoxy-D-glucose biosynthesis	0.617032	3.53909e-21
5	gramicidin S biosynthesis, massetolide A biosynthesis, viscosin biosynthesis	0.617032	3.53909e-21
5	GDP-D-perosamine biosynthesis	0.614309	7.61217e-21
5	thiazole component of thiamine diphosphate biosynthesis II	0.614309	7.61217e-21
5	dTDP-4-O-demethyl-beta-L-noviose biosynthesis	0.614309	7.61217e-21
5	spermidine biosynthesis III, D-cycloserine biosynthesis	0.614309	7.61217e-21
5	vancomycin resistance II	1.32606	2.14549e-20
5	oxalate degradation III	0.658444	2.26378e-20
5	glycogen biosynthesis I (from ADP-D-Glucose)	0.763486	3.08744e-20
5	oleate biosynthesis II (animals and fungi)	0.788476	3.27013e-20
5	benzoate degradation II (aerobic and anaerobic)	0.792971	7.34364e-20
5	(5Z)-dodecenoate biosynthesis I	0.739826	5.28877e-19
5	oleate biosynthesis IV (anaerobic)	0.739826	5.28877e-19
5	two-component alkanesulfonate monooxygenase	0.762562	8.02195e-19
5	methylamine degradation II	0.674232	1.17837e-18
5	L-lysine degradation IV	0.641852	2.14187e-18
5	L-arginine biosynthesis II (acetyl cycle)	0.786199	2.40398e-18
5	paraoxon degradation, 8-amino-7-oxononanoate biosynthesis I	1.2454	2.40398e-18
5	N-acetylglucosamine degradation I	1.2454	2.40398e-18
5	methylthiopropanoate degradation I (cleavage)	0.773525	2.40398e-18
5	L-asparagine biosynthesis II	1.2454	2.40398e-18
5	thiosulfate disproportionation IV (rhodanese)	0.756753	2.49409e-18
5	guanylyl molybdenum cofactor biosynthesis, bis(guanylyl molybdenum cofactor) biosynthesis, bis(guanylyl tungstenpterin) cofactor biosynthesis	0.67013	3.18696e-18
5	UDP-N-acetyl-&alpha;-D-quinovosamine biosynthesis	0.641556	4.34991e-18
5	ketolysis	1.50334	4.92475e-18
5	purine nucleobases degradation II (anaerobic)	0.749107	5.47639e-18
5	pyridoxal 5'-phosphate salvage I	0.738658	8.90753e-18
5	glycine betaine degradation I	0.609156	3.62552e-17
5	pyruvate fermentation to (S)-acetoin	1.32942	4.16585e-17
5	starch degradation V	0.809612	5.80811e-17
5	malonate decarboxylase activation	0.751735	2.59961e-16
5	malate/L-aspartate shuttle pathway	1.46664	2.62511e-16
5	C4 photosynthetic carbon assimilation cycle, NAD-ME type	1.46664	2.62511e-16
5	cardiolipin biosynthesis III, cardiolipin biosynthesis I	0.826091	3.58335e-16
5	glycerol degradation I	0.826091	3.58335e-16
5	fructose degradation	0.826091	3.58335e-16
5	phosphatidylserine and phosphatidylethanolamine biosynthesis I	0.826091	3.58335e-16
5	volatile esters biosynthesis (during fruit ripening)	0.773715	9.42026e-16
5	(S,S)-butanediol degradation, (S,S)-butanediol biosynthesis, meso-butanediol biosynthesis I	1.31593	1.01997e-15
5	(-)-dehydrodiconiferyl alcohol degradation	0.691862	1.10447e-15
5	Entner-Doudoroff pathway III (semi-phosphorylative)	0.826261	1.86797e-15
5	protocatechuate degradation II (ortho-cleavage pathway)	1.22142	2.49423e-15
5	L-arginine degradation IX (arginine:pyruvate transaminase pathway), pyoverdine I biosynthesis, 4-aminobutanoate degradation IV, polyhydroxydecanoate biosynthesis, N-acetylglutaminylglutamine amide biosynthesis, phosphatidate biosynthesis (yeast), anhydromuropeptides recycling II	0.604895	7.59716e-15
5	glycine betaine biosynthesis III (plants)	0.78083	7.81775e-15
5	mixed acid fermentation	0.885896	8.3686e-15
5	methylsalicylate degradation	0.830504	1.20231e-14
5	anaerobic energy metabolism (invertebrates, cytosol)	1.18627	1.20231e-14
5	L-lysine degradation V	0.644635	1.54866e-14
5	cyanide detoxification I	0.657372	2.44005e-14
5	D-arginine degradation, urate conversion to allantoin III	0.657372	2.44005e-14
5	acetate and ATP formation from acetyl-CoA II	1.2173	8.65251e-14
5	UDP-N-acetyl-&alpha;-D-fucosamine biosynthesis	0.638595	9.9041e-14
5	Entner-Doudoroff shunt	0.758959	1.92589e-13
5	beta-alanine degradation I, taurine degradation I, hypotaurine degradation	0.714399	2.02809e-13
5	chitin deacetylation	0.76545	2.25142e-13
5	seleno-amino acid detoxification and volatilization I	1.15969	9.40597e-13
5	L-selenocysteine biosynthesis I (bacteria)	0.817958	9.92551e-13
5	chlorogenic acid degradation	1.52543	2.66691e-12
5	glycolysis III (from glucose)	0.814043	7.13783e-12
5	mevalonate degradation	1.28353	8.42272e-12
5	tetrahydrofolate salvage from 5,10-methenyltetrahydrofolate	0.831474	1.33375e-11
5	glutaminyl-tRNAgln biosynthesis via transamidation	0.749678	4.25084e-11
5	spermidine biosynthesis II	0.707623	4.90547e-11
5	L-citrulline degradation	0.904079	5.53227e-11
5	acrylate degradation I	0.816843	5.89677e-11
5	L-threonine biosynthesis, L-methionine biosynthesis II	0.798808	9.83988e-11
5	ethionamide activation	1.2291	9.83988e-11
5	glycine biosynthesis II, glycine cleavage	0.798808	9.83988e-11
5	ribose phosphorylation	0.889933	1.03938e-10
5	putrescine degradation V	0.780862	1.5648e-10
5	4-aminobutanoate degradation I, 4-aminobutanoate degradation III, 4-aminobutanoate degradation II	0.82581	2.00777e-10
5	uracil degradation I (reductive), thymine degradation	0.626599	2.16193e-10
5	dibenzothiophene desulfurization	0.727325	2.95737e-10
5	cytochrome c biogenesis (system III type)	0.714254	3.32295e-10
5	D-glucuronate degradation II	0.69454	4.16114e-10
5	adenosylcobinamide-GDP biosynthesis from cobyrinate a,c-diamide	0.671766	4.51129e-10
5	putrescine degradation II	0.800445	5.38349e-10
5	shikimate degradation II	0.6002	5.741e-10
5	alginate biosynthesis I (algal)	0.6002	5.741e-10
5	vancomycin resistance I	1.22064	8.31478e-10
5	L-alanine degradation II (to D-lactate)	0.879542	1.23511e-09
5	4-hydroxybenzoate biosynthesis I (eukaryotes)	0.879542	1.23511e-09
5	taurine degradation III	0.742092	6.34804e-09
5	D-lactate to cytochrome bo oxidase electron transfer, methylglyoxal degradation I	1.34075	6.54509e-09
5	L-threonine degradation IV	0.889663	9.46941e-09
5	ethanol degradation I	0.889663	9.46941e-09
5	glucose degradation (oxidative)	0.743937	9.88594e-09
5	thiazole component of thiamine diphosphate biosynthesis I	0.910603	1.00636e-08
5	quinate degradation I, shikimate degradation I	0.778952	1.24174e-08
5	D-galactosamine and N-acetyl-D-galactosamine degradation	1.12732	2.28179e-08
5	trehalose degradation I (low osmolarity)	0.838737	2.69499e-08
5	inosine-5'-phosphate biosynthesis I	0.835785	3.33636e-08
5	flavin biosynthesis I (bacteria and plants)	0.835785	3.33636e-08
5	L-tyrosine degradation I	1.09249	7.40542e-08
5	polyhydroxybutanoate biosynthesis	0.750162	1.43329e-07
5	L-histidine biosynthesis	0.85415	1.56969e-07
5	sulfate activation for sulfonation	0.603661	2.30338e-07
5	beta-alanine degradation III	0.612129	2.58964e-07
5	pyruvate fermentation to propanoate I	1.13146	3.42877e-07
5	phenylethanol degradation	0.66579	4.08457e-07
5	nitroethane degradation	0.852615	6.09102e-07
5	spermine biosynthesis, aminopropylcadaverine biosynthesis	0.874963	1.05858e-06
5	L-phenylalanine biosynthesis II	0.802309	1.12755e-06
5	L-arginine degradation I (arginase pathway)	1.09007	1.24764e-06
5	citronellol degradation	1.13474	1.50051e-06
5	ethene biosynthesis I (plants)	0.705038	1.73521e-06
5	tetrahydropteridine recycling	0.672535	1.87935e-06
5	nitrate reduction III (dissimilatory)	1.18879	2.61304e-06
5	nitrate reduction IX (dissimilatory)	1.18879	2.61304e-06
5	adenine and adenosine salvage III, purine deoxyribonucleosides degradation II, purine deoxyribonucleosides degradation I	0.92138	7.23436e-06
5	purine ribonucleosides degradation	0.92138	7.23436e-06
5	S-methyl-5'-thioadenosine degradation II, Agmatine extracellular biosynthesis	0.92138	7.23436e-06
5	L-threonine degradation II	0.92138	7.23436e-06
5	curcumin degradation	0.841542	9.569e-06
5	L-arginine degradation II (AST pathway)	0.803638	1.11706e-05
5	UDP-N-acetyl-D-galactosamine biosynthesis II	1.13125	1.5349e-05
5	ethanolamine utilization	0.75623	2.66167e-05
5	cyclopropane fatty acid (CFA) biosynthesis	1.22691	3.0929e-05
5	2-methyl-branched fatty acid beta-oxidation, valproate beta-oxidation	0.854593	3.19982e-05
5	glutathionylspermidine biosynthesis, trypanothione biosynthesis	1.06542	3.78288e-05
5	ethylene glycol degradation	0.914674	4.27335e-05
5	lipoate biosynthesis and incorporation II	1.14803	7.15874e-05
5	phosphatidylethanolamine biosynthesis III, cob(II)yrinate a,c-diamide biosynthesis II (late cobalt incorporation), phosphatidylserine biosynthesis II	0.587147	7.47068e-05
5	gallate degradation II	0.678816	7.57977e-05
5	biotin-carboxyl carrier protein assembly	0.92362	8.20396e-05
5	fatty acid biosynthesis initiation (type II)	1.14402	9.26657e-05
5	10,13-epoxy-11-methyl-octadecadienoate biosynthesis	0.829716	0.000100446
5	anandamide degradation	0.604703	0.00011239
5	salicylate biosynthesis I	1.13829	0.000126077
5	L-histidine degradation I	1.30738	0.00013721
5	glyphosate degradation II	0.826025	0.000139325
5	fatty acid salvage	0.826025	0.000139325
5	chlorosalicylate degradation, salicylate degradation I, methylsalicylate degradation	1.14989	0.000155
5	formate to trimethylamine N-oxide electron transfer, formate to dimethyl sulfoxide electron transfer	1.1599	0.000155
5	sulfoacetaldehyde degradation III	0.856114	0.000256627
5	2-oxoisovalerate decarboxylation to isobutanoyl-CoA	0.742097	0.000274017
5	aerobactin biosynthesis	1.20136	0.000318258
5	L-glutamate biosynthesis II, L-glutamate degradation X	0.595709	0.000375689
5	L-ornithine biosynthesis II	0.595709	0.000375689
5	glutathione biosynthesis	0.595709	0.000375689
5	NAD(P)/NADPH interconversion, L-serine biosynthesis I	0.595709	0.000375689
5	beta-alanine biosynthesis III	1.27797	0.000459537
5	glycerol-3-phosphate to fumarate electron transfer	1.10001	0.000459757
5	choline degradation III	1.10001	0.000459757
5	pyrimidine ribonucleosides salvage III	0.904672	0.000592556
5	vanchrobactin biosynthesis	0.724767	0.00073687
5	folate transformations III (E. coli), folate transformations II (plants)	0.86083	0.000775098
5	protein N-glycosylation processing phase (plants and animals)	1.35854	0.0007789
5	(R,R)-butanediol degradation, (R,R)-butanediol biosynthesis	0.859576	0.000846708
5	trehalose biosynthesis VII	0.859145	0.000868661
5	L-arginine degradation III (arginine decarboxylase/agmatinase pathway), putrescine biosynthesis I	0.879528	0.000868661
5	trehalose biosynthesis IV	0.859145	0.000868661
5	L-tryptophan degradation IV (via indole-3-lactate)	0.962448	0.000984196
5	dTDP-beta-L-rhamnose biosynthesis	0.766665	0.0012217
5	D-galactarate degradation I	0.823716	0.00139313
5	L-lyxonate degradation	0.63803	0.00154843
5	methylglyoxal degradation III	1.04677	0.00171298
5	alkylnitronates degradation	0.738336	0.00214932
5	4-hydroxyphenylacetate degradation	1.12331	0.00219407
5	polymyxin resistance	0.927239	0.00235058
5	8-oxo-(d)GTP detoxification I	1.19848	0.00257705
5	L-ornithine degradation I (L-proline biosynthesis), aerobic respiration I (cytochrome c), aerobic respiration II (cytochrome c) (yeast)	0.631427	0.00273444
5	indole-3-acetate degradation I	1.1478	0.00284912
5	assimilatory sulfate reduction IV	0.943774	0.00291442
5	glycolate and glyoxylate degradation II, arsenate reduction (respiratory)	0.606893	0.00359977
5	sulfoquinovose degradation II	0.606893	0.00359977
5	4-oxopentanoate degradation	0.606893	0.00359977
5	dimethylsulfoniopropanoate degradation II (cleavage), manganese oxidation II, L-phenylalanine degradation V	0.606893	0.00359977
5	D-glucarate degradation II	0.753789	0.00414144
5	5'-deoxyadenosine degradation I	0.873074	0.00419123
5	sulfide oxidation I (to sulfur globules)	0.742712	0.00699252
5	pyruvate fermentation to acetate II	0.706918	0.00709391
5	sulfoacetaldehyde degradation I	0.706918	0.00709391
5	acetate and ATP formation from acetyl-CoA I	0.706918	0.00709391
5	L-threonine degradation V	0.840946	0.00774199
5	palmitoyl ethanolamide biosynthesis, diacylglycerol and triacylglycerol biosynthesis	1.01422	0.00776986
5	pentose phosphate pathway (non-oxidative branch) II	1.05213	0.00836881
5	assimilatory sulfate reduction II	0.875171	0.0129232
5	L-arginine degradation XIII (reductive Stickland reaction)	0.843997	0.0129232
5	octane oxidation	1.14067	0.0133756
5	mycothiol oxidation	0.656466	0.0143636
5	ornithine lipid biosynthesis	0.904847	0.01551
5	N-methylpyrrolidone degradation	0.690936	0.0157797
5	ubiquinol-8 biosynthesis (late decarboxylation)	0.969443	0.0203599
5	propanoyl-CoA degradation II	1.01029	0.0206216
5	4-deoxy-L-threo-hex-4-enopyranuronate degradation	1.14089	0.0211768
5	sulfoacetaldehyde degradation IV	1.0593	0.0231232
5	mannosylglycerate biosynthesis I	0.9315	0.0231678
5	anhydromuropeptides recycling I, 2-deoxy-&alpha;-D-ribose 1-phosphate degradation, adenosine deoxyribonucleotides de novo biosynthesis II, guanosine deoxyribonucleotides de novo biosynthesis II, sucrose degradation I (sucrose phosphotransferase)	1.06546	0.0255479
5	D-galactose detoxification, D-galactose degradation I (Leloir pathway)	1.06546	0.0255479
5	UDP-N-acetyl-&alpha;-D-mannosaminouronate biosynthesis	1.06546	0.0255479
5	N-end rule pathway II (prokaryotic)	0.926692	0.0255479
5	S-adenosyl-L-methionine salvage II	0.926692	0.0255479
5	preQ0 biosynthesis	1.06546	0.0255479
5	pyrimidine ribonucleosides salvage I	1.06546	0.0255479
5	L-threonine degradation I, pyruvate fermentation to ethanol I	1.06546	0.0255479
5	glycerophosphodiester degradation	1.06546	0.0255479
5	menaquinol-7 biosynthesis, demethylmenaquinol-9 biosynthesis, demethylmenaquinol-8 biosynthesis I, demethylmenaquinol-6 biosynthesis I, menaquinol-10 biosynthesis, menaquinol-11 biosynthesis, menaquinol-12 biosynthesis, menaquinol-13 biosynthesis, pyrimidine deoxyribonucleosides salvage, demethylmenaquinol-4 biosynthesis	1.06546	0.0255479
5	L-isoleucine biosynthesis II	1.06546	0.0255479
5	sedoheptulose bisphosphate bypass	1.06546	0.0255479
5	2-carboxy-1,4-naphthoquinol biosynthesis, S-adenosyl-L-methionine salvage I, autoinducer AI-2 biosynthesis I, adenine and adenosine salvage II, S-adenosyl-L-methionine cycle I	1.06546	0.0255479
5	pyrimidine ribonucleosides degradation, pyrimidine ribonucleosides salvage II, pyrimidine deoxyribonucleosides degradation	1.06546	0.0255479
5	phospholipid remodeling (phosphatidate, yeast)	1.06546	0.0255479
5	(Kdo)2-lipid A biosynthesis I (E. coli), CDP-diacylglycerol biosynthesis II, folate transformations I, NAD salvage pathway IV (from nicotinamide riboside), acyl-[acyl-carrier protein] thioesterase pathway, cis-vaccenate biosynthesis, palmitoleate biosynthesis I (from (5Z)-dodec-5-enoate), adenine and adenosine salvage V, guanine and guanosine salvage III, pyrimidine deoxyribonucleotides de novo b…	1.06546	0.0255479
5	L-valine degradation I	0.926692	0.0255479
5	sulfate reduction I (assimilatory)	1.06546	0.0255479
5	L-glutamate degradation V (via hydroxyglutarate), L-glutamate degradation XI (reductive Stickland reaction)	0.960858	0.0287517
5	ethanol degradation IV	1.39896	0.0296533
5	ubiquinol-9 biosynthesis (early decarboxylation), ubiquinol-10 biosynthesis (early decarboxylation), ubiquinol-8 biosynthesis (early decarboxylation)	0.948742	0.0340543
5	aerobic respiration III (alternative oxidase pathway)	1.22038	0.0447914
5	Ferredoxin:NAD+ oxidoreductase	0.900513	0.0447914
5	glycolysis IV	1.02936	0.0447914
5	pyruvate decarboxylation to acetyl CoA II, Pyruvate-ferredoxin oxidorectase to acetyl-CoA	1.02936	0.0447914
5	nitrate reduction X (dissimilatory, periplasmic)	0.794572	0.0479719
6	pyruvate fermentation to butanol II (engineered)	1.30537	0.0118008
7	vancomycin resistance I	1.26523	9.73333e-14
7	urea degradation I	0.91853	9.44639e-12
7	L-tryptophan degradation II (via pyruvate)	1.29376	1.00927e-10
7	gamma-resorcylate degradation II	0.888619	1.93172e-09
7	pyruvate fermentation to ethanol II, pyruvate fermentation to acetate VIII, acetaldehyde biosynthesis II, butanol and isobutanol biosynthesis (engineered)	1.24399	1.57572e-07
7	8-amino-7-oxononanoate biosynthesis III	3.06385	2.47235e-07
7	Agmatine Transport	1.08619	2.27821e-06
7	N-acetylneuraminate and N-acetylmannosamine degradation I	1.26859	2.60049e-06
7	vancomycin resistance II	1.27347	1.18934e-05
7	phosphatidylserine and phosphatidylethanolamine biosynthesis I	0.99886	1.53491e-05
7	fructose degradation	0.99886	1.53491e-05
7	cardiolipin biosynthesis III, cardiolipin biosynthesis I	0.99886	1.53491e-05
7	glycerol degradation I	0.99886	1.53491e-05
7	glycerol degradation II	1.24503	2.5776e-05
7	acetate and ATP formation from acetyl-CoA I	0.895583	5.547e-05
7	pyruvate fermentation to acetate II	0.895583	5.547e-05
7	sulfoacetaldehyde degradation I	0.895583	5.547e-05
7	dimethyl sulfide degradation II (oxidation)	0.891336	9.14338e-05
7	L-citrulline degradation	1.04432	0.000119029
7	alkylnitronates degradation	0.766048	0.000119333
7	ubiquinol-8 biosynthesis (late decarboxylation)	1.07688	0.000193037
7	(-)-dehydrodiconiferyl alcohol degradation	0.767546	0.000242937
7	2-methylcitrate cycle I	1.1057	0.000271134
7	assimilatory sulfate reduction III	0.873871	0.000321259
7	xanthine and xanthosine salvage	0.981804	0.000672451
7	5-(methoxycarbonylmethoxy)uridine biosynthesis, CDP-diacylglycerol biosynthesis I	0.981804	0.000672451
7	adenine and adenosine salvage I	0.981804	0.000672451
7	CDP-diacylglycerol biosynthesis III	0.981804	0.000672451
7	L-cysteine degradation III	0.981804	0.000672451
7	resorcinol degradation	0.909902	0.000772708
7	chlorinated phenols degradation	0.925891	0.00109092
7	L-histidine degradation I	1.22386	0.00144925
7	4-hydroxybenzoate biosynthesis I (eukaryotes)	0.990671	0.00176839
7	L-alanine degradation II (to D-lactate)	0.990671	0.00176839
7	assimilatory sulfate reduction IV	1.05918	0.00243983
7	chlorosalicylate degradation, salicylate degradation I, methylsalicylate degradation	0.915771	0.00246262
7	glutathione biosynthesis	0.99939	0.00273632
7	L-ornithine biosynthesis II	0.99939	0.00273632
7	NAD(P)/NADPH interconversion, L-serine biosynthesis I	0.99939	0.00273632
7	L-glutamate biosynthesis II, L-glutamate degradation X	0.99939	0.00273632
7	acetate and ATP formation from acetyl-CoA II	1.17089	0.00489025
7	glutathionylspermidine biosynthesis, trypanothione biosynthesis	1.11108	0.00544333
7	L-valine degradation II, L-leucine degradation III, L-isoleucine degradation II, indole-3-acetate biosynthesis VI (bacteria)	1.22603	0.0062193
7	D-galactarate degradation I	0.854568	0.00779357
7	phospholipases	0.889023	0.00826462
7	thiosulfate disproportionation IV (rhodanese)	0.962468	0.00857681
7	tetrapyrrole biosynthesis II (from glycine)	0.961921	0.00857681
7	anaerobic energy metabolism (invertebrates, cytosol)	1.02997	0.00888821
7	methylsalicylate degradation	0.961603	0.00888821
7	thiosulfate disproportionation II (cytochrome), thiosulfate disproportionation III (quinone)	1.33359	0.00944579
7	trehalose biosynthesis V	1.06615	0.0111904
7	arginine deiminase test	1.03112	0.0112165
7	starch degradation V	0.990559	0.0125137
7	pyrimidine ribonucleosides salvage III	1.04033	0.0129816
7	thiazole component of thiamine diphosphate biosynthesis I	0.987802	0.0149633
7	nitrate reduction VIIIb (dissimilatory)	1.21003	0.0158415
7	beta-alanine degradation II, beta-alanine biosynthesis II	0.895373	0.0160052
7	chitin degradation II (Vibrio)	1.09383	0.0171811
7	trehalose biosynthesis IV	1.02668	0.0171811
7	L-arginine degradation III (arginine decarboxylase/agmatinase pathway), putrescine biosynthesis I	1.03494	0.0171811
7	trehalose biosynthesis VII	1.02668	0.0171811
7	methylamine degradation II	0.728626	0.0178313
7	D-galactarate degradation II	0.797757	0.0192872
7	biotin-carboxyl carrier protein assembly	1.06209	0.0196552
7	ethanol degradation III, salidroside biosynthesis, L-Tyrosine degradation to 4-hydroxyphenylacetate via tyramine	1.3809	0.0214324
7	di-trans,poly-cis-undecaprenyl phosphate biosynthesis	0.644145	0.0214324
7	taurine degradation III	0.785072	0.0218078
7	glycine betaine biosynthesis I (Gram-negative bacteria), choline degradation I, isethionate degradation, choline degradation II	1.25163	0.022531
7	4-hydroxybenzoate biosynthesis III (plants), 4-coumarate degradation (anaerobic), 4-coumarate degradation (aerobic)	1.07762	0.0234416
7	Entner-Doudoroff pathway III (semi-phosphorylative)	0.981743	0.0343554
7	gentisate degradation I	0.867222	0.0366575
7	Entner-Doudoroff shunt	0.991323	0.0369051
7	putrescine degradation V	0.960072	0.0389625
7	L-tryptophan degradation IV (via indole-3-lactate)	1.04529	0.0389625
7	trehalose degradation II (cytosolic)	1.03461	0.0451
7	thiamine diphosphate biosynthesis II (Bacillus), thiamine diphosphate biosynthesis I (E. coli)	1.03793	0.0456376
7	ferulate degradation	1.03117	0.0473727
7	phenylethylamine degradation II	1.03117	0.0473727
7	volatile esters biosynthesis (during fruit ripening)	0.98706	0.0482392
7	L-ascorbate biosynthesis III (D-sorbitol pathway)	1.01635	0.0491062
8	D-apionate degradation I (xylose isomerase family decarboxylase)	0.551314	1.02341e-31
8	serine racemization	1.29579	8.80142e-18
8	senecionine N-oxide biosynthesis	1.39083	6.70688e-17
8	glutaryl-CoA degradation	1.27147	9.00088e-17
8	NAD salvage pathway III (to nicotinamide riboside)	0.669014	6.28146e-16
8	glucosylglycerol biosynthesis, trehalose biosynthesis II, NAD salvage pathway I (PNC VI cycle), trehalose biosynthesis I	0.803869	3.85677e-13
8	2-O-&alpha;-mannosyl-D-glycerate degradation	0.764724	1.53368e-12
8	L-lysine biosynthesis III	1.43022	4.014e-12
8	cyanophycin metabolism	1.43487	3.01686e-11
8	taurine degradation II, benzoyl-CoA degradation I (aerobic), L-rhamnose degradation III	1.43487	3.01686e-11
8	nylon-6 oligomer degradation, sulfide oxidation II (flavocytochrome c), sulfite oxidation I, thiosulfate oxidation III (multienzyme complex), diethylphosphate degradation, 4-ethylphenol degradation (anaerobic), testosterone and androsterone degradation to androstendione (aerobic), 4-methylphenol degradation to protocatechuate, terephthalate degradation, toluene degradation to 2-hydroxypentadienoa…	1.39273	1.3231e-10
8	UDP-2,3-diacetamido-2,3-dideoxy-&alpha;-D-mannuronate biosynthesis	1.39273	1.3231e-10
8	acetoacetate degradation (to acetyl CoA)	0.757809	4.4833e-09
8	mimosine biosynthesis, terminal olefins biosynthesis II	0.518391	2.61076e-08
8	L-arginine degradation I (arginase pathway)	1.20588	7.67382e-08
8	putrescine degradation I	0.732617	9.75982e-08
8	L-lysine degradation X	0.732617	9.75982e-08
8	flavin biosynthesis I (bacteria and plants)	0.833583	1.32287e-07
8	inosine-5'-phosphate biosynthesis I	0.833583	1.32287e-07
8	tRNA-uridine 2-thiolation and selenation (bacteria)	0.809082	6.0938e-07
8	1,2-propanediol biosynthesis from lactate (engineered)	0.863997	8.8066e-07
8	myo-inositol degradation I	0.767472	2.20639e-06
8	TCA cycle VI (Helicobacter)	1.33977	3.85703e-06
8	8-oxo-(d)GTP detoxification I	0.81232	4.01498e-05
8	chlorosalicylate degradation, salicylate degradation I, methylsalicylate degradation	0.762967	5.27955e-05
8	acyl-CoA hydrolysis, (R)- and (S)-3-hydroxybutanoate biosynthesis (engineered), oleate beta-oxidation (thioesterase-dependent, yeast)	0.75709	6.32106e-05
8	gluconeogenesis III	1.32085	6.32106e-05
8	lathyrine biosynthesis	1.32085	6.32106e-05
8	salicylate degradation II	1.32085	6.32106e-05
8	tRNA processing	0.75709	6.32106e-05
8	4-methylcatechol degradation (ortho cleavage)	0.929681	0.000291946
8	catechol degradation to beta-ketoadipate, 4-chlorocatechol degradation	0.929681	0.000291946
8	D-galactonate degradation	0.738424	0.000429004
8	(aminomethyl)phosphonate degradation	0.8025	0.000529482
8	serotonin degradation	0.845716	0.000857229
8	S-methyl-5-thio-&alpha;-D-ribose 1-phosphate degradation III	0.78167	0.00221311
8	formate to nitrite electron transfer	0.78167	0.00221311
8	5-oxo-L-proline metabolism	0.755644	0.00243533
8	methyl parathion degradation	0.879774	0.00297501
8	thiamine diphosphate salvage I, dTDP-N-acetylthomosamine biosynthesis	0.824139	0.00455069
8	coenzyme A biosynthesis II (eukaryotic)	0.788072	0.00749183
8	methylgallate degradation, protocatechuate degradation I (meta-cleavage pathway), 3-chlorobenzoate degradation II (via protocatechuate), 3,4-dichlorobenzoate degradation	1.26893	0.00749183
8	adenosylcobinamide-GDP salvage from cobinamide I	0.788873	0.010314
8	adeninyl adenosylcobamide biosynthesis from adenosylcobinamide-GDP, 2-methyladeninyl adenosylcobamide biosynthesis from adenosylcobinamide-GDP, 5-methoxy-6-methylbenzimidazolyl adenosylcobamide biosynthesis from adenosylcobinamide-GDP, 5-methoxybenzimidazolyl adenosylcobamide biosynthesis from adenosylcobinamide-GDP, 5-methylbenzimidazolyl adenosylcobamide biosynthesis from adenosylcobinamide-GDP…	0.74028	0.0121222
8	xylitol degradation	0.736521	0.0137932
8	taurine degradation IV	0.806784	0.0153423
8	gallate degradation I	1.21197	0.0154686
8	urea degradation II	0.837173	0.0358652
8	L-phenylalanine biosynthesis I	1.28749	0.0390452
8	trans-3-hydroxy-L-proline degradation	0.776721	0.0390452
8	D-arabinose degradation III, mannosylfructose biosynthesis, L-tyrosine biosynthesis III, D-galacturonate degradation II, icosapentaenoate biosynthesis IV (bacteria), docosahexaenoate biosynthesis II (bacteria), gamma-resorcylate degradation I, D-altritol and galactitol degradation, pseudomonine biosynthesis, homospermidine biosynthesis II, ribitol degradation	0.776721	0.0390452
8	flavin salvage	1.28749	0.0390452
8	pyridoxal 5'-phosphate biosynthesis I	1.28749	0.0390452
8	L-homocysteine biosynthesis	0.776721	0.0390452
8	homospermidine biosynthesis I	0.776721	0.0390452
8	diphenylamine degradation	0.776721	0.0390452
8	partial TCA cycle (obligate autotrophs)	1.28749	0.0390452
8	lipid IVA biosynthesis (E. coli), lipid IVA biosynthesis (P. putida)	1.28749	0.0390452
8	pyrimidine deoxyribonucleotides biosynthesis from CTP	0.776721	0.0390452
8	L-valine biosynthesis	1.28749	0.0390452
8	ubiquinol-7 biosynthesis (early decarboxylation), polyphosphate metabolism	1.28749	0.0390452
8	tetrapyrrole biosynthesis I (from glutamate)	1.28749	0.0390452
8	folate polyglutamylation	1.28749	0.0390452
8	heme a biosynthesis	0.776721	0.0390452
8	catechol degradation to 2-hydroxypentadienoate I, catechol degradation to 2-hydroxypentadienoate II, 3-chlorocatechol degradation III (meta pathway)	1.2163	0.0402796
8	assimilatory sulfate reduction IV	0.837934	0.0483702
9	phenylethylamine degradation II	0.797083	6.71194e-23
9	ferulate degradation	0.797083	6.71194e-23
9	benzoate degradation I (aerobic), anthranilate degradation I (aerobic), 2-chlorobenzoate degradation	0.850977	3.6391e-11
9	N-methylpyrrolidone degradation	0.810928	2.16848e-10
9	fatty acid salvage	0.849415	4.18615e-09
9	glyphosate degradation II	0.849415	4.18615e-09
9	2-aminoethylphosphonate degradation I	0.848657	8.20882e-08
9	(R,R)-butanediol degradation, (R,R)-butanediol biosynthesis	0.88019	4.5246e-07
9	sulfoquinovose degradation II	0.806793	5.21213e-06
9	4-oxopentanoate degradation	0.806793	5.21213e-06
9	glycolate and glyoxylate degradation II, arsenate reduction (respiratory)	0.806793	5.21213e-06
9	dimethylsulfoniopropanoate degradation II (cleavage), manganese oxidation II, L-phenylalanine degradation V	0.806793	5.21213e-06
9	cyclopropane fatty acid (CFA) biosynthesis	1.13134	8.41692e-05
9	L-threonine degradation V	0.877799	0.00081672
9	dibenzothiophene desulfurization	0.820642	0.00413619
9	CDP-4-dehydro-3,6-dideoxy-D-glucose biosynthesis	0.826064	0.0115632
9	L-arginine degradation X (arginine monooxygenase pathway)	0.826064	0.0115632
9	L-proline biosynthesis II (from arginine)	0.826064	0.0115632
9	gramicidin S biosynthesis, massetolide A biosynthesis, viscosin biosynthesis	0.826064	0.0115632
9	cyanide degradation	0.938906	0.0233022
9	acyl carrier protein activation	1.17644	0.0233022
9	spermidine biosynthesis II	0.848802	0.0371158
9	2-methyl-branched fatty acid beta-oxidation, valproate beta-oxidation	0.912202	0.0491541
10	GDP-D-perosamine biosynthesis	0.561592	1.36962e-39
10	thiazole component of thiamine diphosphate biosynthesis II	0.561592	1.36962e-39
10	spermidine biosynthesis III, D-cycloserine biosynthesis	0.561592	1.36962e-39
10	dTDP-4-O-demethyl-beta-L-noviose biosynthesis	0.561592	1.36962e-39
10	L-arabinose degradation III, L-arabinose degradation IV	0.621602	4.80719e-27
10	oxalate degradation III	0.651455	3.25182e-23
10	taurine degradation III	0.6839	5.38569e-23
10	pectin degradation I	2.08395	5.53854e-23
10	vancomycin resistance I	1.43998	2.08279e-21
10	putrescine degradation I	0.593548	7.76382e-20
10	L-lysine degradation X	0.593548	7.76382e-20
10	ascorbate recycling (cytosolic)	0.656788	3.86321e-18
10	aerobactin biosynthesis	1.40764	1.37352e-16
10	methylamine degradation II	0.650705	3.58699e-16
10	vancomycin resistance II	1.51049	5.83208e-16
10	dibenzothiophene desulfurization	0.681193	2.34212e-15
10	beta-alanine degradation I, taurine degradation I, hypotaurine degradation	0.681051	9.17163e-15
10	L-arginine degradation IX (arginine:pyruvate transaminase pathway), pyoverdine I biosynthesis, 4-aminobutanoate degradation IV, polyhydroxydecanoate biosynthesis, N-acetylglutaminylglutamine amide biosynthesis, phosphatidate biosynthesis (yeast), anhydromuropeptides recycling II	0.573154	1.13465e-14
10	UDP-N-acetyl-D-glucosamine biosynthesis II	0.634303	1.22665e-13
10	glycine betaine degradation I	0.606197	2.7421e-12
10	glyphosate degradation I	0.663143	4.69227e-11
10	catechol degradation to 2-hydroxypentadienoate I, catechol degradation to 2-hydroxypentadienoate II, 3-chlorocatechol degradation III (meta pathway)	0.596653	4.98832e-11
10	3-oxoadipate degradation	0.703337	1.5914e-10
10	L-lysine degradation V	0.639367	2.33453e-10
10	L-arginine degradation X (arginine monooxygenase pathway)	0.620023	3.3151e-10
10	L-proline biosynthesis II (from arginine)	0.620023	3.3151e-10
10	gramicidin S biosynthesis, massetolide A biosynthesis, viscosin biosynthesis	0.620023	3.3151e-10
10	CDP-4-dehydro-3,6-dideoxy-D-glucose biosynthesis	0.620023	3.3151e-10
10	8-oxo-(d)GTP detoxification I	1.35915	4.51103e-10
10	(-)-dehydrodiconiferyl alcohol degradation	0.632522	4.52264e-10
10	D-glucuronate degradation II	0.655216	6.336e-10
10	glycerol degradation II	1.37465	7.35032e-10
10	nitrate reduction VIIIb (dissimilatory)	1.37431	1.62476e-09
10	C4 photosynthetic carbon assimilation cycle, PEPCK type	0.65002	1.76201e-09
10	guanosine nucleotides degradation III	0.662276	2.68889e-09
10	L-valine degradation II, L-leucine degradation III, L-isoleucine degradation II, indole-3-acetate biosynthesis VI (bacteria)	1.39359	3.30656e-09
10	C4 photosynthetic carbon assimilation cycle, NAD-ME type	1.62098	4.40015e-09
10	malate/L-aspartate shuttle pathway	1.62098	4.40015e-09
10	seleno-amino acid detoxification and volatilization III	0.682197	5.05362e-09
10	phosphatidylethanolamine biosynthesis III, cob(II)yrinate a,c-diamide biosynthesis II (late cobalt incorporation), phosphatidylserine biosynthesis II	0.584014	8.70568e-09
10	shikimate degradation II	0.592391	1.16695e-08
10	alginate biosynthesis I (algal)	0.592391	1.16695e-08
10	phenylethanol degradation	0.643209	1.52564e-08
10	glycine betaine degradation II (mammalian)	0.717725	5.45339e-08
10	anandamide degradation	0.595631	7.64182e-08
10	dimethylsulfoniopropanoate degradation I (cleavage)	0.589265	9.36863e-08
10	2-aminoethylphosphonate degradation I	0.7733	1.18039e-07
10	UDP-N-acetyl-&alpha;-D-quinovosamine biosynthesis	0.637022	2.28002e-07
10	tRNA-uridine 2-thiolation and selenation (bacteria)	1.32156	2.78774e-07
10	gallate degradation I	0.722134	3.08217e-07
10	glycine betaine biosynthesis III (plants)	0.712852	3.10431e-07
10	linuron degradation	0.587757	4.29637e-07
10	cytochrome c biogenesis (system III type)	0.683722	2.42699e-06
10	guanosine nucleotides degradation II	0.693526	2.56018e-06
10	L-ornithine degradation I (L-proline biosynthesis), aerobic respiration I (cytochrome c), aerobic respiration II (cytochrome c) (yeast)	0.604644	2.85661e-06
[truncated: 2,152 more rows]
